# Supplementary material for: Extreme wet seasons – their definition and relationship with synoptic-scale weather systems
Source: Copernicus journal article supplement (doi:10.5194/wcd-2-71-2021), 2021-02-01
Supplement: Supplementary file 1 [file wcd-2-71-2021-supplement.zip]

To increase clarity, the following figures present four different versions of Fig. 11. Each version shows only patches with a central date of their core period taking place in boreal winter (DJF), spring (MAM), summer (JJA) and autumn (SON).

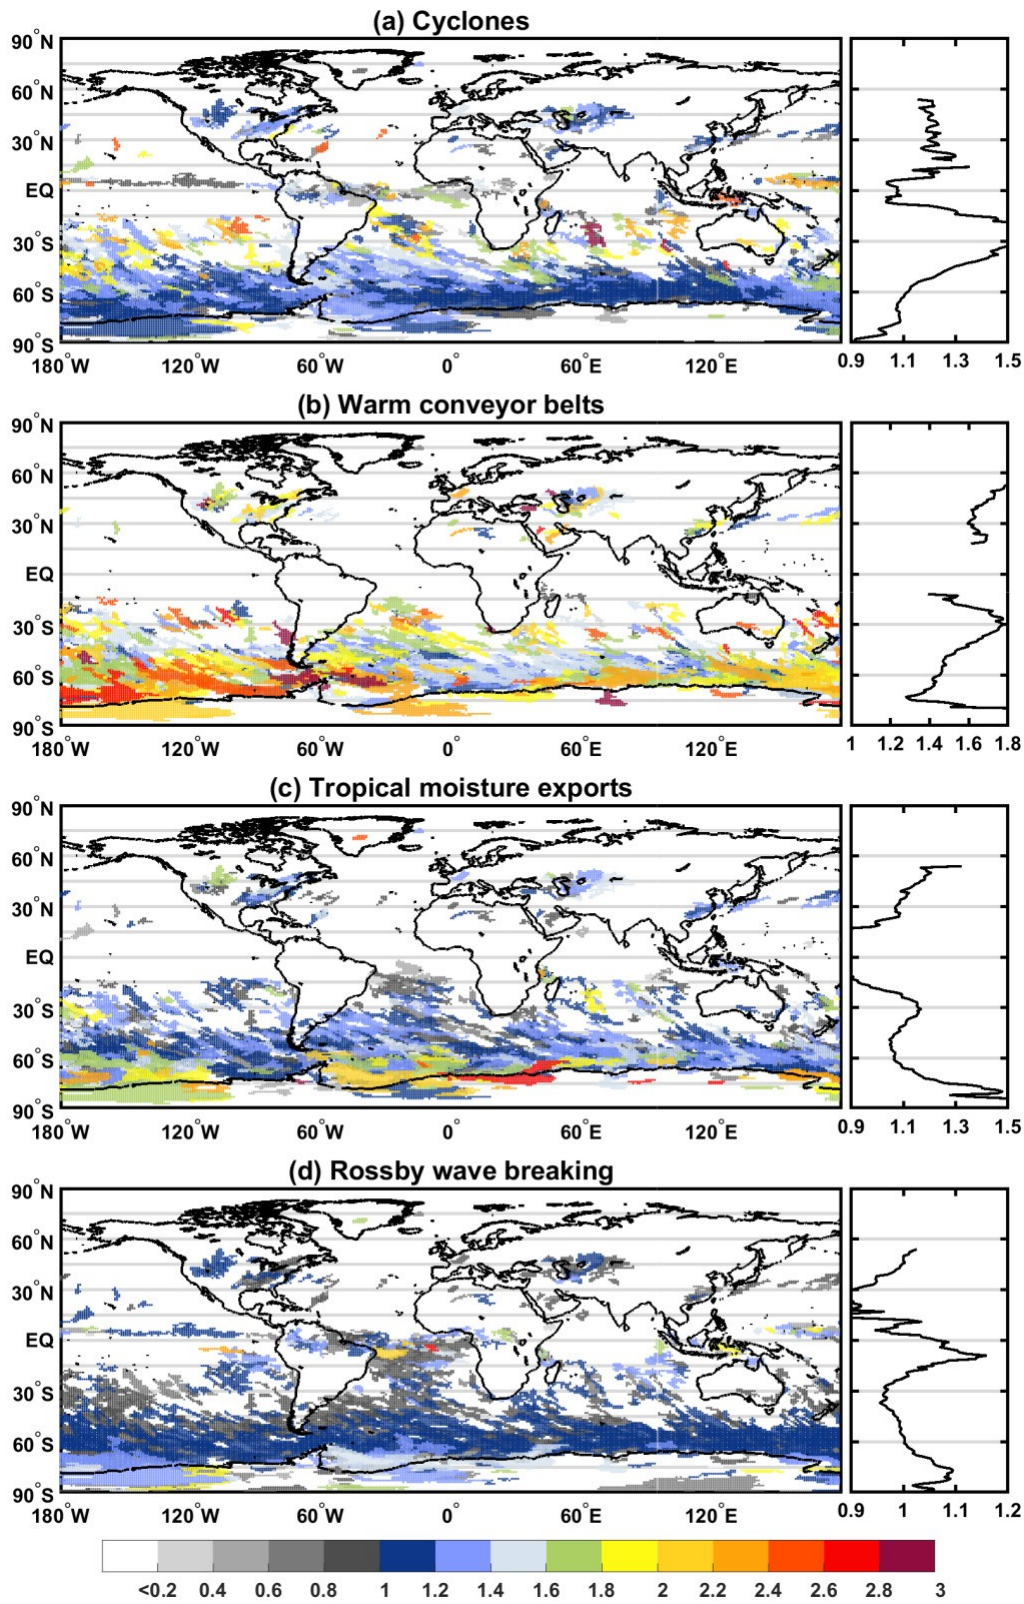

**Figure S1 :**As Fig. 11 in the paper, but here only for patches with a central date in MAM.

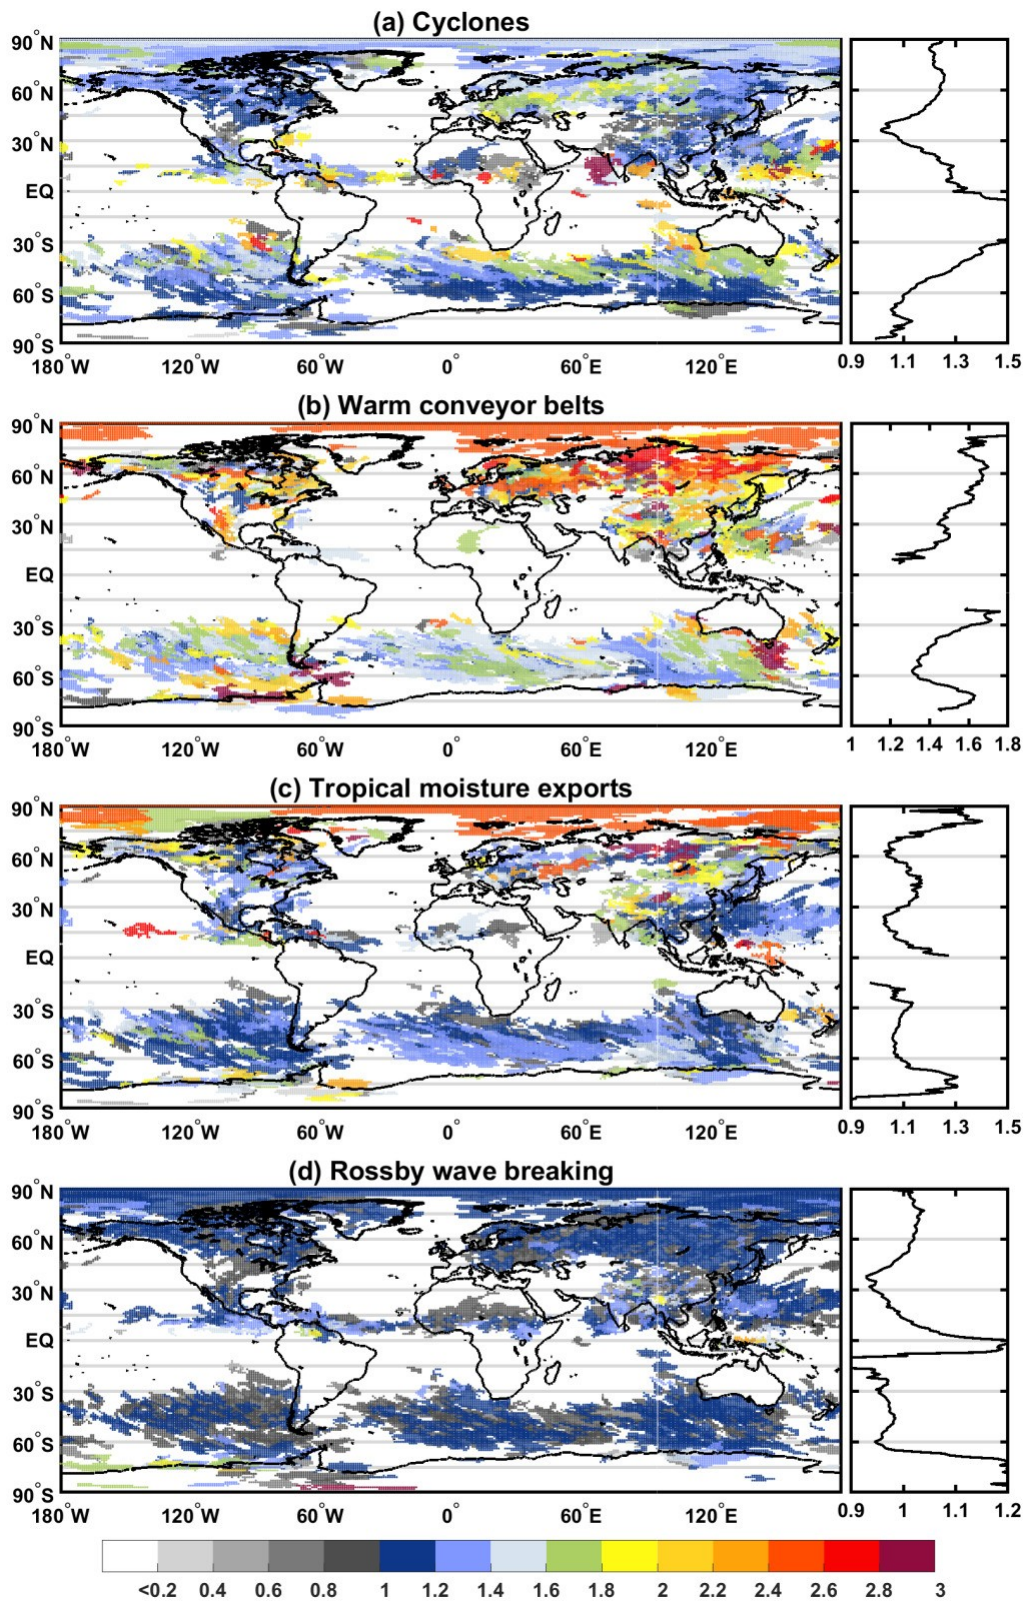

**Figure S2 :** As Fig. 11 in the paper, but here only for patches with a central date in JJA.

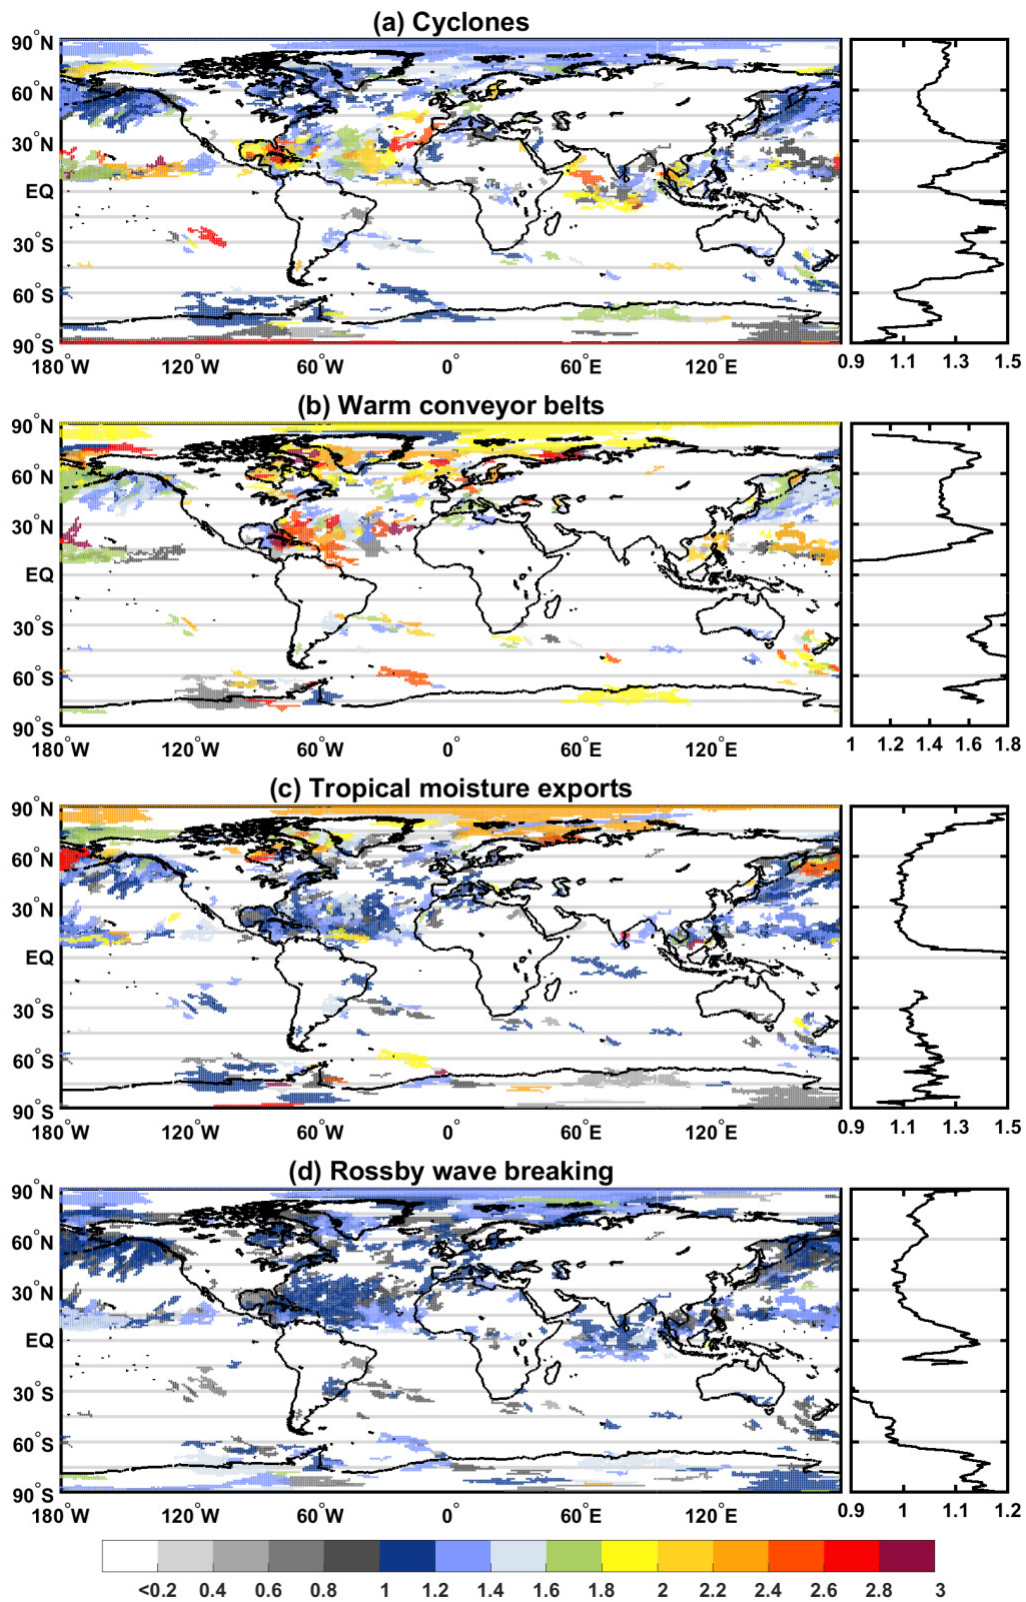

**Figure S3** : As Fig. 11 in the paper, but here only for patches with a central date in SON.

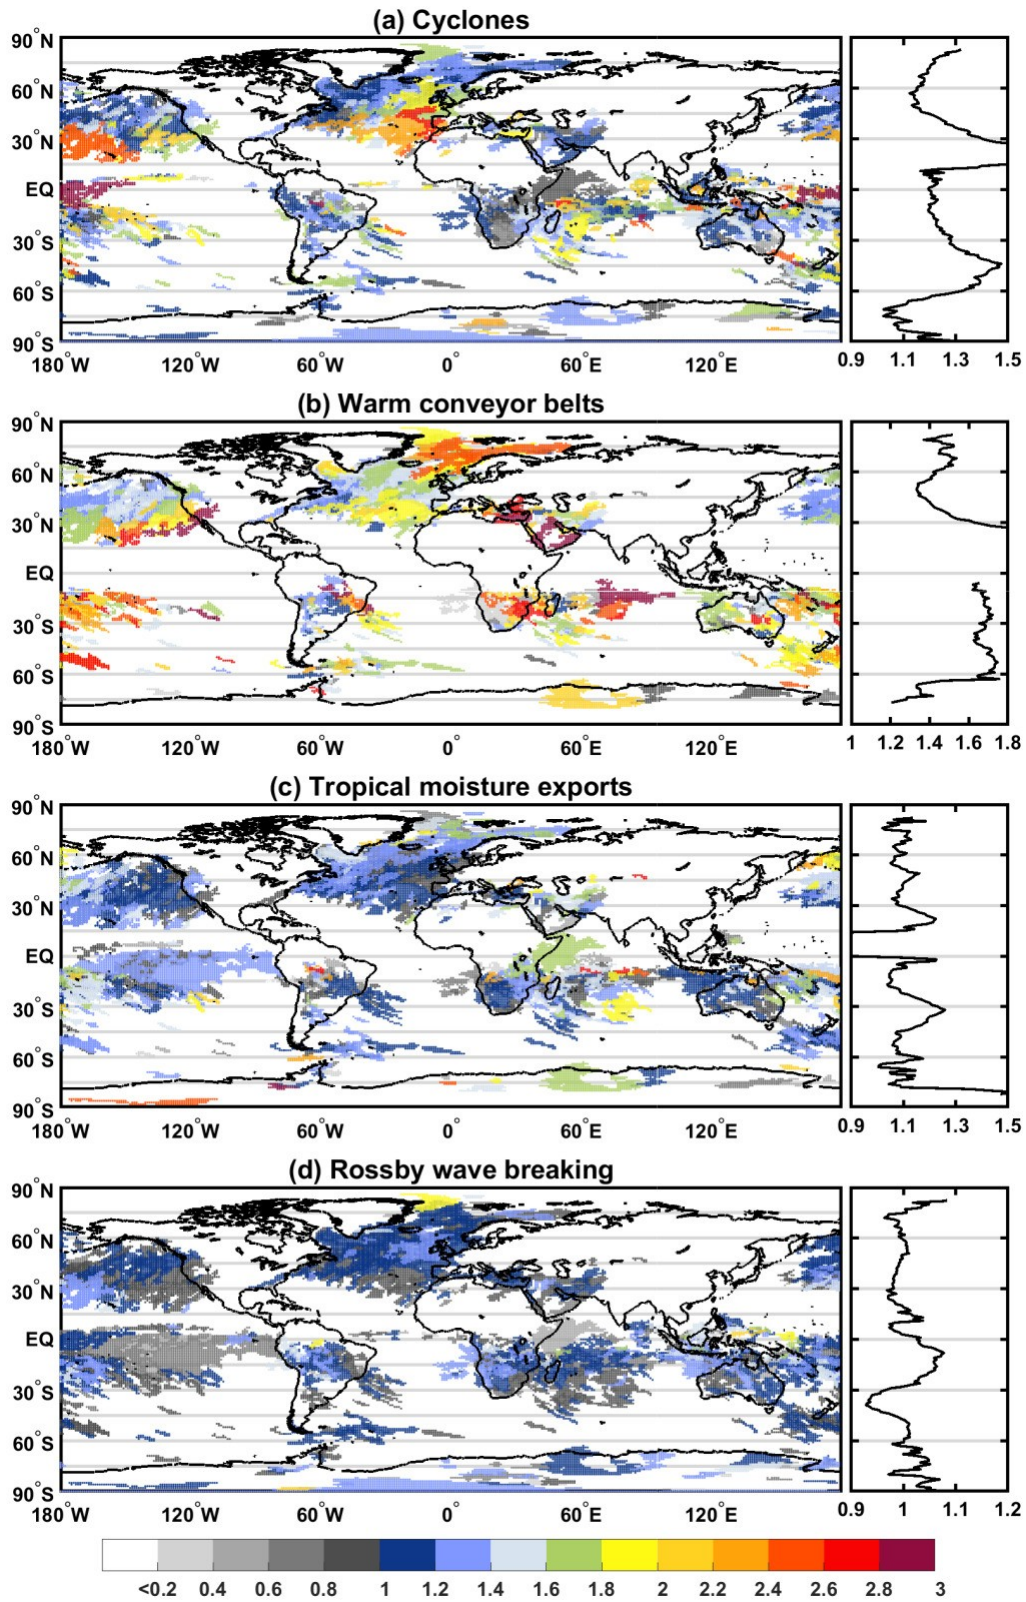

**Figure S4:** As Fig. 11 in the paper, but here only for patches with a central date in DJF.
