# Supplementary material for: Extreme wet seasons – their definition and relationship with synoptic-scale weather systems
Source: Copernicus journal article supplement (doi:10.5194/wcd-2-71-2021), 2021-02-01
Supplement: Supplementary file 2 [file wcd-2-71-2021-supplement.zip]

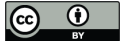

## *Supplement of*

# **Extreme wet seasons – their definition and relationship with synoptic-scale weather systems**

**Emmanouil Flaounas et al.**

*Correspondence to:* Emmanouil Flaounas ([emmanouil.flounas@env.ethz.ch](mailto:emmanouil.flounas@env.ethz.ch))

- [wcd-2-71-2021-supplement-title-page.pdf](#)
- [PATCHES.txt](#)
- [supp2.pdf](#)

The copyright of individual parts of the supplement might differ from the CC BY 4.0 License.
