# Supplementary material for: Extreme wet seasons – their definition and relationship with synoptic-scale weather systems
Source: Copernicus journal article supplement (doi:10.5194/wcd-2-71-2021), 2021-02-01
Supplement: Supplementary file 3 [file wcd-2-71-2021-supplement.zip]

Archive with 3 entries (3 files):
- PATCHES.txt
- wcd-2-71-2021-supplement-title-page.pdf
- supp2.pdf
