# Supplementary material for: Extreme wet seasons – their definition and relationship with synoptic-scale weather systems
Source: Copernicus journal article supplement (doi:10.5194/wcd-2-71-2021), 2021-02-01
Supplement: Supplementary file 3 [file wcd-2-71-2021-supplement.zip › PATCHES.txt]

Columns below represent:
(1) patch number where a grid point belongs to (2-3) longitude and latitude of the grid point (4-5) the beginning and end dates of its extreme season

Patch 1 of 3734, Core period: 19820803-19821031
1 -180.00 -90.00 19820802 19821030
1 -179.00 -90.00 19820802 19821030
1 -178.00 -90.00 19820802 19821030
1 -177.00 -90.00 19820802 19821030
1 -176.00 -90.00 19820802 19821030
1 -175.00 -90.00 19820802 19821030
1 -174.00 -90.00 19820802 19821030
1 -173.00 -90.00 19820802 19821030
1 -172.00 -90.00 19820802 19821030
1 -171.00 -90.00 19820802 19821030
1 -170.00 -90.00 19820802 19821030
1 -169.00 -90.00 19820802 19821030
1 -168.00 -90.00 19820802 19821030
1 -167.00 -90.00 19820802 19821030
1 -166.00 -90.00 19820802 19821030
1 -165.00 -90.00 19820802 19821030
1 -164.00 -90.00 19820802 19821030
1 -163.00 -90.00 19820802 19821030
1 -162.00 -90.00 19820802 19821030
1 -161.00 -90.00 19820802 19821030
1 -160.00 -90.00 19820802 19821030
1 -159.00 -90.00 19820802 19821030
1 -158.00 -90.00 19820802 19821030
1 -157.00 -90.00 19820802 19821030
1 -156.00 -90.00 19820802 19821030
1 -155.00 -90.00 19820802 19821030
1 -154.00 -90.00 19820802 19821030
1 -153.00 -90.00 19820802 19821030
1 -152.00 -90.00 19820802 19821030
1 -151.00 -90.00 19820802 19821030
1 -150.00 -90.00 19820802 19821030
1 -149.00 -90.00 19820802 19821030
1 -148.00 -90.00 19820802 19821030
1 -147.00 -90.00 19820802 19821030
1 -146.00 -90.00 19820802 19821030
1 -145.00 -90.00 19820802 19821030
1 -144.00 -90.00 19820802 19821030
1 -143.00 -90.00 19820802 19821030
1 -142.00 -90.00 19820802 19821030
1 -141.00 -90.00 19820802 19821030
1 -140.00 -90.00 19820802 19821030
1 -139.00 -90.00 19820802 19821030
1 -138.00 -90.00 19820802 19821030
1 -137.00 -90.00 19820802 19821030
1 -136.00 -90.00 19820802 19821030
1 -135.00 -90.00 19820802 19821030
1 -134.00 -90.00 19820802 19821030
1 -133.00 -90.00 19820802 19821030
1 -132.00 -90.00 19820802 19821030
1 -131.00 -90.00 19820802 19821030
1 -130.00 -90.00 19820802 19821030
1 -129.00 -90.00 19820802 19821030
1 -128.00 -90.00 19820802 19821030
1 -127.00 -90.00 19820802 19821030
1 -126.00 -90.00 19820802 19821030
1 -125.00 -90.00 19820802 19821030
1 -124.00 -90.00 19820802 19821030
1 -123.00 -90.00 19820802 19821030
1 -122.00 -90.00 19820802 19821030
1 -121.00 -90.00 19820802 19821030
1 -120.00 -90.00 19820802 19821030
1 -119.00 -90.00 19820802 19821030
1 -118.00 -90.00 19820802 19821030
1 -117.00 -90.00 19820802 19821030
1 -116.00 -90.00 19820802 19821030
1 -115.00 -90.00 19820802 19821030
1 -114.00 -90.00 19820802 19821030
1 -113.00 -90.00 19820802 19821030
1 -112.00 -90.00 19820802 19821030
1 -111.00 -90.00 19820802 19821030
1 -110.00 -90.00 19820802 19821030
1 -109.00 -90.00 19820802 19821030
1 -108.00 -90.00 19820802 19821030
1 -107.00 -90.00 19820802 19821030
1 -106.00 -90.00 19820802 19821030
1 -105.00 -90.00 19820802 19821030
1 -104.00 -90.00 19820802 19821030
1 -103.00 -90.00 19820802 19821030
1 -102.00 -90.00 19820802 19821030
1 -101.00 -90.00 19820802 19821030
1 -100.00 -90.00 19820802 19821030
1 -99.00 -90.00 19820802 19821030
1 -98.00 -90.00 19820802 19821030
1 -97.00 -90.00 19820802 19821030
1 -96.00 -90.00 19820802 19821030
1 -95.00 -90.00 19820802 19821030
1 -94.00 -90.00 19820802 19821030
1 -93.00 -90.00 19820802 19821030
1 -92.00 -90.00 19820802 19821030
1 -91.00 -90.00 19820802 19821030
1 -90.00 -90.00 19820802 19821030
1 -89.00 -90.00 19820802 19821030
1 -88.00 -90.00 19820802 19821030
1 -87.00 -90.00 19820802 19821030
1 -86.00 -90.00 19820802 19821030
1 -85.00 -90.00 19820802 19821030
1 -84.00 -90.00 19820802 19821030
1 -83.00 -90.00 19820802 19821030
1 -82.00 -90.00 19820802 19821030
1 -81.00 -90.00 19820802 19821030
1 -80.00 -90.00 19820802 19821030
1 -79.00 -90.00 19820802 19821030
1 -78.00 -90.00 19820802 19821030
1 -77.00 -90.00 19820802 19821030
1 -76.00 -90.00 19820802 19821030
1 -75.00 -90.00 19820802 19821030
1 -74.00 -90.00 19820802 19821030
1 -73.00 -90.00 19820802 19821030
1 -72.00 -90.00 19820802 19821030
1 -71.00 -90.00 19820802 19821030
1 -70.00 -90.00 19820802 19821030
1 -69.00 -90.00 19820802 19821030
1 -68.00 -90.00 19820802 19821030
1 -67.00 -90.00 19820802 19821030
1 -66.00 -90.00 19820802 19821030
1 -65.00 -90.00 19820802 19821030
1 -64.00 -90.00 19820802 19821030
1 -63.00 -90.00 19820802 19821030
1 -62.00 -90.00 19820802 19821030
1 -61.00 -90.00 19820802 19821030
1 -60.00 -90.00 19820802 19821030
1 -59.00 -90.00 19820802 19821030
1 -58.00 -90.00 19820802 19821030
1 -57.00 -90.00 19820802 19821030
1 -56.00 -90.00 19820802 19821030
1 -55.00 -90.00 19820802 19821030
1 -54.00 -90.00 19820802 19821030
1 -53.00 -90.00 19820802 19821030
1 -52.00 -90.00 19820802 19821030
1 -51.00 -90.00 19820802 19821030
1 -50.00 -90.00 19820802 19821030
1 -49.00 -90.00 19820802 19821030
1 -48.00 -90.00 19820802 19821030
1 -47.00 -90.00 19820802 19821030
1 -46.00 -90.00 19820802 19821030
1 -45.00 -90.00 19820802 19821030
1 -44.00 -90.00 19820802 19821030
1 -43.00 -90.00 19820802 19821030
1 -42.00 -90.00 19820802 19821030
1 -41.00 -90.00 19820802 19821030
1 -40.00 -90.00 19820802 19821030
1 -39.00 -90.00 19820802 19821030
1 -38.00 -90.00 19820802 19821030
1 -37.00 -90.00 19820802 19821030
1 -36.00 -90.00 19820802 19821030
1 -35.00 -90.00 19820802 19821030
1 -34.00 -90.00 19820802 19821030
1 -33.00 -90.00 19820802 19821030
1 -32.00 -90.00 19820802 19821030
1 -31.00 -90.00 19820802 19821030
1 -30.00 -90.00 19820802 19821030
1 -29.00 -90.00 19820802 19821030
1 -28.00 -90.00 19820802 19821030
1 -27.00 -90.00 19820802 19821030
1 -26.00 -90.00 19820802 19821030
1 -25.00 -90.00 19820802 19821030
1 -24.00 -90.00 19820802 19821030
1 -23.00 -90.00 19820802 19821030
1 -22.00 -90.00 19820802 19821030
1 -21.00 -90.00 19820802 19821030
1 -20.00 -90.00 19820802 19821030
1 -19.00 -90.00 19820802 19821030
1 -18.00 -90.00 19820802 19821030
1 -17.00 -90.00 19820802 19821030
1 -16.00 -90.00 19820802 19821030
1 -15.00 -90.00 19820802 19821030
1 -14.00 -90.00 19820802 19821030
1 -13.00 -90.00 19820802 19821030
1 -12.00 -90.00 19820802 19821030
1 -11.00 -90.00 19820802 19821030
1 -10.00 -90.00 19820802 19821030
1 -9.00 -90.00 19820802 19821030
1 -8.00 -90.00 19820802 19821030
1 -7.00 -90.00 19820802 19821030
1 -6.00 -90.00 19820802 19821030
1 -5.00 -90.00 19820802 19821030
1 -4.00 -90.00 19820802 19821030
1 -3.00 -90.00 19820802 19821030
1 -2.00 -90.00 19820802 19821030
1 -1.00 -90.00 19820802 19821030
1 0.00 -90.00 19820802 19821030
1 1.00 -90.00 19820802 19821030
1 2.00 -90.00 19820802 19821030
1 3.00 -90.00 19820802 19821030
1 4.00 -90.00 19820802 19821030
1 5.00 -90.00 19820802 19821030
1 6.00 -90.00 19820802 19821030
1 7.00 -90.00 19820802 19821030
1 8.00 -90.00 19820802 19821030
1 9.00 -90.00 19820802 19821030
1 10.00 -90.00 19820802 19821030
1 11.00 -90.00 19820802 19821030
1 12.00 -90.00 19820802 19821030
1 13.00 -90.00 19820802 19821030
1 14.00 -90.00 19820802 19821030
1 15.00 -90.00 19820802 19821030
1 16.00 -90.00 19820802 19821030
1 17.00 -90.00 19820802 19821030
1 18.00 -90.00 19820802 19821030
1 19.00 -90.00 19820802 19821030
1 20.00 -90.00 19820802 19821030
1 21.00 -90.00 19820802 19821030
1 22.00 -90.00 19820802 19821030
1 23.00 -90.00 19820802 19821030
1 24.00 -90.00 19820802 19821030
1 25.00 -90.00 19820802 19821030
1 26.00 -90.00 19820802 19821030
1 27.00 -90.00 19820802 19821030
1 28.00 -90.00 19820802 19821030
1 29.00 -90.00 19820802 19821030
1 30.00 -90.00 19820802 19821030
1 31.00 -90.00 19820802 19821030
1 32.00 -90.00 19820802 19821030
1 33.00 -90.00 19820802 19821030
1 34.00 -90.00 19820802 19821030
1 35.00 -90.00 19820802 19821030
1 36.00 -90.00 19820802 19821030
1 37.00 -90.00 19820802 19821030
1 38.00 -90.00 19820802 19821030
1 39.00 -90.00 19820802 19821030
1 40.00 -90.00 19820802 19821030
1 41.00 -90.00 19820802 19821030
1 42.00 -90.00 19820802 19821030
1 43.00 -90.00 19820802 19821030
1 44.00 -90.00 19820802 19821030
1 45.00 -90.00 19820802 19821030
1 46.00 -90.00 19820802 19821030
1 47.00 -90.00 19820802 19821030
1 48.00 -90.00 19820802 19821030
1 49.00 -90.00 19820802 19821030
1 50.00 -90.00 19820802 19821030
1 51.00 -90.00 19820802 19821030
1 52.00 -90.00 19820802 19821030
1 53.00 -90.00 19820802 19821030
1 54.00 -90.00 19820802 19821030
1 55.00 -90.00 19820802 19821030
1 56.00 -90.00 19820802 19821030
1 57.00 -90.00 19820802 19821030
1 58.00 -90.00 19820802 19821030
1 59.00 -90.00 19820802 19821030
1 60.00 -90.00 19820802 19821030
1 61.00 -90.00 19820802 19821030
1 62.00 -90.00 19820802 19821030
1 63.00 -90.00 19820802 19821030
1 64.00 -90.00 19820802 19821030
1 65.00 -90.00 19820802 19821030
1 66.00 -90.00 19820802 19821030
1 67.00 -90.00 19820802 19821030
1 68.00 -90.00 19820802 19821030
1 69.00 -90.00 19820802 19821030
1 70.00 -90.00 19820802 19821030
1 71.00 -90.00 19820802 19821030
1 72.00 -90.00 19820802 19821030
1 73.00 -90.00 19820802 19821030
1 74.00 -90.00 19820802 19821030
1 75.00 -90.00 19820802 19821030
1 76.00 -90.00 19820802 19821030
1 77.00 -90.00 19820802 19821030
1 78.00 -90.00 19820802 19821030
1 79.00 -90.00 19820802 19821030
1 80.00 -90.00 19820802 19821030
1 81.00 -90.00 19820802 19821030
1 82.00 -90.00 19820802 19821030
1 83.00 -90.00 19820802 19821030
1 84.00 -90.00 19820802 19821030
1 85.00 -90.00 19820802 19821030
1 86.00 -90.00 19820802 19821030
1 87.00 -90.00 19820802 19821030
1 88.00 -90.00 19820802 19821030
1 89.00 -90.00 19820802 19821030
1 90.00 -90.00 19820802 19821030
1 91.00 -90.00 19820802 19821030
1 92.00 -90.00 19820802 19821030
1 93.00 -90.00 19820802 19821030
1 94.00 -90.00 19820802 19821030
1 95.00 -90.00 19820802 19821030
1 96.00 -90.00 19820802 19821030
1 97.00 -90.00 19820802 19821030
1 98.00 -90.00 19820802 19821030
1 99.00 -90.00 19820802 19821030
1 100.00 -90.00 19820802 19821030
1 101.00 -90.00 19820802 19821030
1 102.00 -90.00 19820802 19821030
1 103.00 -90.00 19820802 19821030
1 104.00 -90.00 19820802 19821030
1 105.00 -90.00 19820802 19821030
1 106.00 -90.00 19820802 19821030
1 107.00 -90.00 19820802 19821030
1 108.00 -90.00 19820802 19821030
1 109.00 -90.00 19820802 19821030
1 110.00 -90.00 19820802 19821030
1 111.00 -90.00 19820802 19821030
1 112.00 -90.00 19820802 19821030
1 113.00 -90.00 19820802 19821030
1 114.00 -90.00 19820802 19821030
1 115.00 -90.00 19820802 19821030
1 116.00 -90.00 19820802 19821030
1 117.00 -90.00 19820802 19821030
1 118.00 -90.00 19820802 19821030
1 119.00 -90.00 19820802 19821030
1 120.00 -90.00 19820802 19821030
1 121.00 -90.00 19820802 19821030
1 122.00 -90.00 19820802 19821030
1 123.00 -90.00 19820802 19821030
1 124.00 -90.00 19820802 19821030
1 125.00 -90.00 19820802 19821030
1 126.00 -90.00 19820802 19821030
1 127.00 -90.00 19820802 19821030
1 128.00 -90.00 19820802 19821030
1 129.00 -90.00 19820802 19821030
1 130.00 -90.00 19820802 19821030
1 131.00 -90.00 19820802 19821030
1 132.00 -90.00 19820802 19821030
1 133.00 -90.00 19820802 19821030
1 134.00 -90.00 19820802 19821030
1 135.00 -90.00 19820802 19821030
1 136.00 -90.00 19820802 19821030
1 137.00 -90.00 19820802 19821030
1 138.00 -90.00 19820802 19821030
1 139.00 -90.00 19820802 19821030
1 140.00 -90.00 19820802 19821030
1 141.00 -90.00 19820802 19821030
1 142.00 -90.00 19820802 19821030
1 143.00 -90.00 19820802 19821030
1 144.00 -90.00 19820802 19821030
1 145.00 -90.00 19820802 19821030
1 146.00 -90.00 19820802 19821030
1 147.00 -90.00 19820802 19821030
1 148.00 -90.00 19820802 19821030
1 149.00 -90.00 19820802 19821030
1 150.00 -90.00 19820802 19821030
1 151.00 -90.00 19820802 19821030
1 152.00 -90.00 19820802 19821030
1 153.00 -90.00 19820802 19821030
1 154.00 -90.00 19820802 19821030
1 155.00 -90.00 19820802 19821030
1 156.00 -90.00 19820802 19821030
1 157.00 -90.00 19820802 19821030
1 158.00 -90.00 19820802 19821030
1 159.00 -90.00 19820802 19821030
1 160.00 -90.00 19820802 19821030
1 161.00 -90.00 19820802 19821030
1 162.00 -90.00 19820802 19821030
1 163.00 -90.00 19820802 19821030
1 164.00 -90.00 19820802 19821030
1 165.00 -90.00 19820802 19821030
1 166.00 -90.00 19820802 19821030
1 167.00 -90.00 19820802 19821030
1 168.00 -90.00 19820802 19821030
1 169.00 -90.00 19820802 19821030
1 170.00 -90.00 19820802 19821030
1 171.00 -90.00 19820802 19821030
1 172.00 -90.00 19820802 19821030
1 173.00 -90.00 19820802 19821030
1 174.00 -90.00 19820802 19821030
1 175.00 -90.00 19820802 19821030
1 176.00 -90.00 19820802 19821030
1 177.00 -90.00 19820802 19821030
1 178.00 -90.00 19820802 19821030
1 179.00 -90.00 19820802 19821030
1 -148.00 -89.00 19820802 19821030
1 -147.00 -89.00 19820802 19821030
1 -146.00 -89.00 19820802 19821030
1 -145.00 -89.00 19820802 19821030
1 -144.00 -89.00 19820802 19821030
1 -143.00 -89.00 19820802 19821030
1 -142.00 -89.00 19820802 19821030
1 -141.00 -89.00 19820802 19821030
1 -140.00 -89.00 19820802 19821030
1 -139.00 -89.00 19820802 19821030
1 -138.00 -89.00 19820802 19821030
1 -137.00 -89.00 19820802 19821030
1 -136.00 -89.00 19820802 19821030
1 -135.00 -89.00 19820802 19821030
1 -134.00 -89.00 19820802 19821030
1 -133.00 -89.00 19820802 19821030
1 -132.00 -89.00 19820802 19821030
1 -131.00 -89.00 19820802 19821030
1 -130.00 -89.00 19820802 19821030
1 -129.00 -89.00 19820802 19821030
1 -128.00 -89.00 19820802 19821030
1 -127.00 -89.00 19820802 19821030
1 -126.00 -89.00 19820802 19821030
1 -125.00 -89.00 19820802 19821030
1 -124.00 -89.00 19820802 19821030
1 -123.00 -89.00 19820802 19821030
1 -122.00 -89.00 19820802 19821030
1 -121.00 -89.00 19820802 19821030
1 -120.00 -89.00 19820802 19821030
1 -119.00 -89.00 19820802 19821030
1 -118.00 -89.00 19820802 19821030
1 -117.00 -89.00 19820802 19821030
1 -116.00 -89.00 19820802 19821030
1 -115.00 -89.00 19820802 19821030
1 -114.00 -89.00 19820802 19821030
1 -113.00 -89.00 19820802 19821030
1 -112.00 -89.00 19820802 19821030
1 -111.00 -89.00 19820802 19821030
1 -110.00 -89.00 19820802 19821030
1 -109.00 -89.00 19820802 19821030
1 -108.00 -89.00 19820802 19821030
1 -107.00 -89.00 19820802 19821030
1 -106.00 -89.00 19820802 19821030
1 -105.00 -89.00 19820802 19821030
1 -104.00 -89.00 19820802 19821030
1 -103.00 -89.00 19820802 19821030
1 -102.00 -89.00 19820802 19821030
1 -101.00 -89.00 19820802 19821030
1 -100.00 -89.00 19820802 19821030
1 -99.00 -89.00 19820802 19821030
1 -98.00 -89.00 19820802 19821030
1 -97.00 -89.00 19820802 19821030
1 -96.00 -89.00 19820802 19821030
1 -95.00 -89.00 19820802 19821030
1 -94.00 -89.00 19820802 19821030
1 -93.00 -89.00 19820802 19821030
1 -92.00 -89.00 19820802 19821030
1 -91.00 -89.00 19820802 19821030
1 -90.00 -89.00 19820802 19821030
1 -89.00 -89.00 19820802 19821030
1 -88.00 -89.00 19820802 19821030
1 -87.00 -89.00 19820802 19821030
1 -86.00 -89.00 19820802 19821030
1 -85.00 -89.00 19820802 19821030
1 -84.00 -89.00 19820802 19821030
1 -83.00 -89.00 19820802 19821030
1 -82.00 -89.00 19820802 19821030
1 -81.00 -89.00 19820802 19821030
1 -80.00 -89.00 19820802 19821030
1 -79.00 -89.00 19820802 19821030
1 -78.00 -89.00 19820802 19821030
1 -77.00 -89.00 19820802 19821030
1 -76.00 -89.00 19820802 19821030
1 -75.00 -89.00 19820802 19821030
1 -74.00 -89.00 19820802 19821030
1 -73.00 -89.00 19820802 19821030
1 -72.00 -89.00 19820802 19821030
1 -71.00 -89.00 19820802 19821030
1 -70.00 -89.00 19820802 19821030
1 -69.00 -89.00 19820802 19821030
1 -68.00 -89.00 19820802 19821030
1 -67.00 -89.00 19820802 19821030
1 -66.00 -89.00 19820802 19821030
1 -46.00 -89.00 19820802 19821030
1 -45.00 -89.00 19820802 19821030
1 -44.00 -89.00 19820802 19821030
1 -43.00 -89.00 19820802 19821030
1 -42.00 -89.00 19820802 19821030
1 -41.00 -89.00 19820802 19821030
1 -40.00 -89.00 19820802 19821030
1 -39.00 -89.00 19820802 19821030
1 -38.00 -89.00 19820802 19821030
1 -37.00 -89.00 19820802 19821030
1 -36.00 -89.00 19820802 19821030
1 -35.00 -89.00 19820802 19821030
1 -34.00 -89.00 19820802 19821030
1 -33.00 -89.00 19820802 19821030
1 -32.00 -89.00 19820802 19821030
1 -31.00 -89.00 19820802 19821030
1 -30.00 -89.00 19820802 19821030
1 -29.00 -89.00 19820802 19821030
1 -28.00 -89.00 19820802 19821030
1 -27.00 -89.00 19820802 19821030
1 -26.00 -89.00 19820802 19821030
1 -116.00 -88.00 19820802 19821030
1 -115.00 -88.00 19820802 19821030
1 -114.00 -88.00 19820802 19821030
1 -113.00 -88.00 19820802 19821030
1 -112.00 -88.00 19820802 19821030
1 -111.00 -88.00 19820802 19821030
1 -110.00 -88.00 19820802 19821030
1 -109.00 -88.00 19820802 19821030
1 -108.00 -88.00 19820802 19821030
1 -107.00 -88.00 19820802 19821030
1 -106.00 -88.00 19820802 19821030
1 -105.00 -88.00 19820802 19821030
1 -104.00 -88.00 19820802 19821030
1 -103.00 -88.00 19820802 19821030
1 -102.00 -88.00 19820802 19821030
1 -101.00 -88.00 19820802 19821030
1 -100.00 -88.00 19820802 19821030
1 -99.00 -88.00 19820802 19821030
1 -98.00 -88.00 19820802 19821030
1 -97.00 -88.00 19820802 19821030
1 -96.00 -88.00 19820802 19821030
1 -95.00 -88.00 19820802 19821030
1 -94.00 -88.00 19820802 19821030
1 -93.00 -88.00 19820802 19821030
1 -92.00 -88.00 19820802 19821030
1 -91.00 -88.00 19820802 19821030
1 -90.00 -88.00 19820802 19821030
1 -89.00 -88.00 19820802 19821030
1 -88.00 -88.00 19820802 19821030
1 -87.00 -88.00 19820802 19821030
1 -86.00 -88.00 19820802 19821030
1 -85.00 -88.00 19820802 19821030
1 -83.00 -88.00 19820802 19821030
1 -82.00 -88.00 19820802 19821030
1 -81.00 -88.00 19820802 19821030
1 -80.00 -88.00 19820802 19821030
1 -79.00 -88.00 19820802 19821030
1 -78.00 -88.00 19820802 19821030
1 -77.00 -88.00 19820802 19821030
1 -76.00 -88.00 19820802 19821030
1 -75.00 -88.00 19820802 19821030
1 -74.00 -88.00 19820802 19821030
1 -69.00 -88.00 19820802 19821030
1 -68.00 -88.00 19820802 19821030
1 -67.00 -88.00 19820802 19821030
1 -66.00 -88.00 19820802 19821030
1 -65.00 -88.00 19820802 19821030
1 -64.00 -88.00 19820802 19821030
1 -112.00 -87.00 19820802 19821030
1 -84.00 -87.00 19820802 19821030
1 -179.00 -89.00 19820803 19821031
1 -178.00 -89.00 19820803 19821031
1 -177.00 -89.00 19820803 19821031
1 -176.00 -89.00 19820803 19821031
1 -174.00 -89.00 19820803 19821031
1 -173.00 -89.00 19820803 19821031
1 -172.00 -89.00 19820803 19821031
1 -171.00 -89.00 19820803 19821031
1 -170.00 -89.00 19820803 19821031
1 -169.00 -89.00 19820803 19821031
1 -168.00 -89.00 19820803 19821031
1 -167.00 -89.00 19820803 19821031
1 -166.00 -89.00 19820803 19821031
1 -165.00 -89.00 19820803 19821031
1 -164.00 -89.00 19820803 19821031
1 -163.00 -89.00 19820803 19821031
1 -162.00 -89.00 19820803 19821031
1 -161.00 -89.00 19820803 19821031
1 -160.00 -89.00 19820803 19821031
1 -159.00 -89.00 19820803 19821031
1 -158.00 -89.00 19820803 19821031
1 -157.00 -89.00 19820803 19821031
1 -156.00 -89.00 19820803 19821031
1 -155.00 -89.00 19820803 19821031
1 -154.00 -89.00 19820803 19821031
1 -153.00 -89.00 19820803 19821031
1 -152.00 -89.00 19820803 19821031
1 -151.00 -89.00 19820803 19821031
1 -150.00 -89.00 19820803 19821031
1 -149.00 -89.00 19820803 19821031
1 -169.00 -88.00 19820803 19821031
1 -168.00 -88.00 19820803 19821031
1 -167.00 -88.00 19820803 19821031
1 -166.00 -88.00 19820803 19821031
1 -165.00 -88.00 19820803 19821031
1 -73.00 -88.00 19820922 19821220
1 -72.00 -88.00 19820922 19821220
1 -71.00 -88.00 19820922 19821220
1 -70.00 -88.00 19820922 19821220

Patch 2 of 3734, Core period: 20011230-20020330
2 -37.00 -83.00 20011228 20020327
2 -36.00 -83.00 20011228 20020327
2 -35.00 -83.00 20011228 20020327
2 -34.00 -83.00 20011228 20020327
2 -33.00 -83.00 20011228 20020327
2 -32.00 -83.00 20011228 20020327
2 -31.00 -83.00 20011228 20020327
2 -30.00 -83.00 20011228 20020327
2 -29.00 -83.00 20011228 20020327
2 -28.00 -83.00 20011228 20020327
2 -27.00 -83.00 20011228 20020327
2 -26.00 -83.00 20011228 20020327
2 -25.00 -83.00 20011228 20020327
2 -24.00 -83.00 20011228 20020327
2 -23.00 -83.00 20011228 20020327
2 -22.00 -83.00 20011228 20020327
2 -21.00 -83.00 20011228 20020327
2 -20.00 -83.00 20011228 20020327
2 -19.00 -83.00 20011228 20020327
2 -78.00 -89.00 20011229 20020328
2 -77.00 -89.00 20011229 20020328
2 -70.00 -88.00 20011229 20020328
2 -69.00 -88.00 20011229 20020328
2 -68.00 -88.00 20011229 20020328
2 -67.00 -88.00 20011229 20020328
2 -66.00 -88.00 20011229 20020328
2 -65.00 -88.00 20011229 20020328
2 -64.00 -88.00 20011229 20020328
2 -63.00 -88.00 20011229 20020328
2 -62.00 -88.00 20011229 20020328
2 -61.00 -88.00 20011229 20020328
2 -60.00 -88.00 20011229 20020328
2 -59.00 -88.00 20011229 20020328
2 -58.00 -88.00 20011229 20020328
2 -57.00 -88.00 20011229 20020328
2 -56.00 -88.00 20011229 20020328
2 -55.00 -88.00 20011229 20020328
2 -54.00 -88.00 20011229 20020328
2 -53.00 -88.00 20011229 20020328
2 -52.00 -88.00 20011229 20020328
2 -51.00 -88.00 20011229 20020328
2 -50.00 -88.00 20011229 20020328
2 -49.00 -88.00 20011229 20020328
2 -48.00 -88.00 20011229 20020328
2 -47.00 -88.00 20011229 20020328
2 -46.00 -88.00 20011229 20020328
2 -45.00 -88.00 20011229 20020328
2 -44.00 -88.00 20011229 20020328
2 -43.00 -88.00 20011229 20020328
2 -42.00 -88.00 20011229 20020328
2 -41.00 -88.00 20011229 20020328
2 -40.00 -88.00 20011229 20020328
2 -39.00 -88.00 20011229 20020328
2 -38.00 -88.00 20011229 20020328
2 -37.00 -88.00 20011229 20020328
2 -36.00 -88.00 20011229 20020328
2 -35.00 -88.00 20011229 20020328
2 -34.00 -88.00 20011229 20020328
2 -33.00 -88.00 20011229 20020328
2 -32.00 -88.00 20011229 20020328
2 -31.00 -88.00 20011229 20020328
2 -30.00 -88.00 20011229 20020328
2 -29.00 -88.00 20011229 20020328
2 -28.00 -88.00 20011229 20020328
2 -27.00 -88.00 20011229 20020328
2 -26.00 -88.00 20011229 20020328
2 -25.00 -88.00 20011229 20020328
2 -24.00 -88.00 20011229 20020328
2 -23.00 -88.00 20011229 20020328
2 -22.00 -88.00 20011229 20020328
2 -21.00 -88.00 20011229 20020328
2 -20.00 -88.00 20011229 20020328
2 -19.00 -88.00 20011229 20020328
2 -18.00 -88.00 20011229 20020328
2 -17.00 -88.00 20011229 20020328
2 -52.00 -87.00 20011229 20020328
2 -50.00 -87.00 20011229 20020328
2 -49.00 -87.00 20011229 20020328
2 -48.00 -87.00 20011229 20020328
2 -47.00 -87.00 20011229 20020328
2 -46.00 -87.00 20011229 20020328
2 -45.00 -87.00 20011229 20020328
2 -44.00 -87.00 20011229 20020328
2 -43.00 -87.00 20011229 20020328
2 -42.00 -87.00 20011229 20020328
2 -41.00 -87.00 20011229 20020328
2 -40.00 -87.00 20011229 20020328
2 -39.00 -87.00 20011229 20020328
2 -38.00 -87.00 20011229 20020328
2 -37.00 -87.00 20011229 20020328
2 -36.00 -87.00 20011229 20020328
2 -35.00 -87.00 20011229 20020328
2 -34.00 -87.00 20011229 20020328
2 -33.00 -87.00 20011229 20020328
2 -32.00 -87.00 20011229 20020328
2 -31.00 -87.00 20011229 20020328
2 -30.00 -87.00 20011229 20020328
2 -29.00 -87.00 20011229 20020328
2 -28.00 -87.00 20011229 20020328
2 -27.00 -87.00 20011229 20020328
2 -26.00 -87.00 20011229 20020328
2 -25.00 -87.00 20011229 20020328
2 -24.00 -87.00 20011229 20020328
2 -23.00 -87.00 20011229 20020328
2 -22.00 -87.00 20011229 20020328
2 -21.00 -87.00 20011229 20020328
2 -20.00 -87.00 20011229 20020328
2 -19.00 -87.00 20011229 20020328
2 -18.00 -87.00 20011229 20020328
2 -17.00 -87.00 20011229 20020328
2 -16.00 -87.00 20011229 20020328
2 -15.00 -87.00 20011229 20020328
2 -14.00 -87.00 20011229 20020328
2 -13.00 -87.00 20011229 20020328
2 -12.00 -87.00 20011229 20020328
2 -11.00 -87.00 20011229 20020328
2 -10.00 -87.00 20011229 20020328
2 -9.00 -87.00 20011229 20020328
2 -8.00 -87.00 20011229 20020328
2 -7.00 -87.00 20011229 20020328
2 -6.00 -87.00 20011229 20020328
2 -5.00 -87.00 20011229 20020328
2 -4.00 -87.00 20011229 20020328
2 -54.00 -86.00 20011229 20020328
2 -53.00 -86.00 20011229 20020328
2 -52.00 -86.00 20011229 20020328
2 -51.00 -86.00 20011229 20020328
2 -50.00 -86.00 20011229 20020328
2 -49.00 -86.00 20011229 20020328
2 -48.00 -86.00 20011229 20020328
2 -47.00 -86.00 20011229 20020328
2 -46.00 -86.00 20011229 20020328
2 -45.00 -86.00 20011229 20020328
2 -44.00 -86.00 20011229 20020328
2 -43.00 -86.00 20011229 20020328
2 -42.00 -86.00 20011229 20020328
2 -41.00 -86.00 20011229 20020328
2 -40.00 -86.00 20011229 20020328
2 -39.00 -86.00 20011229 20020328
2 -38.00 -86.00 20011229 20020328
2 -37.00 -86.00 20011229 20020328
2 -36.00 -86.00 20011229 20020328
2 -35.00 -86.00 20011229 20020328
2 -34.00 -86.00 20011229 20020328
2 -33.00 -86.00 20011229 20020328
2 -32.00 -86.00 20011229 20020328
2 -31.00 -86.00 20011229 20020328
2 -30.00 -86.00 20011229 20020328
2 -29.00 -86.00 20011229 20020328
2 -28.00 -86.00 20011229 20020328
2 -27.00 -86.00 20011229 20020328
2 -26.00 -86.00 20011229 20020328
2 -25.00 -86.00 20011229 20020328
2 -24.00 -86.00 20011229 20020328
2 -23.00 -86.00 20011229 20020328
2 -22.00 -86.00 20011229 20020328
2 -21.00 -86.00 20011229 20020328
2 -20.00 -86.00 20011229 20020328
2 -19.00 -86.00 20011229 20020328
2 -18.00 -86.00 20011229 20020328
2 -17.00 -86.00 20011229 20020328
2 -16.00 -86.00 20011229 20020328
2 -15.00 -86.00 20011229 20020328
2 -14.00 -86.00 20011229 20020328
2 -13.00 -86.00 20011229 20020328
2 -12.00 -86.00 20011229 20020328
2 -11.00 -86.00 20011229 20020328
2 -10.00 -86.00 20011229 20020328
2 -9.00 -86.00 20011229 20020328
2 -8.00 -86.00 20011229 20020328
2 -7.00 -86.00 20011229 20020328
2 -6.00 -86.00 20011229 20020328
2 -5.00 -86.00 20011229 20020328
2 -4.00 -86.00 20011229 20020328
2 -3.00 -86.00 20011229 20020328
2 -2.00 -86.00 20011229 20020328
2 -1.00 -86.00 20011229 20020328
2 0.00 -86.00 20011229 20020328
2 1.00 -86.00 20011229 20020328
2 2.00 -86.00 20011229 20020328
2 3.00 -86.00 20011229 20020328
2 4.00 -86.00 20011229 20020328
2 5.00 -86.00 20011229 20020328
2 6.00 -86.00 20011229 20020328
2 7.00 -86.00 20011229 20020328
2 8.00 -86.00 20011229 20020328
2 9.00 -86.00 20011229 20020328
2 10.00 -86.00 20011229 20020328
2 11.00 -86.00 20011229 20020328
2 12.00 -86.00 20011229 20020328
2 13.00 -86.00 20011229 20020328
2 14.00 -86.00 20011229 20020328
2 15.00 -86.00 20011229 20020328
2 16.00 -86.00 20011229 20020328
2 17.00 -86.00 20011229 20020328
2 -51.00 -85.00 20011229 20020328
2 -50.00 -85.00 20011229 20020328
2 -49.00 -85.00 20011229 20020328
2 -48.00 -85.00 20011229 20020328
2 -47.00 -85.00 20011229 20020328
2 -46.00 -85.00 20011229 20020328
2 -45.00 -85.00 20011229 20020328
2 -44.00 -85.00 20011229 20020328
2 -43.00 -85.00 20011229 20020328
2 -42.00 -85.00 20011229 20020328
2 -41.00 -85.00 20011229 20020328
2 -40.00 -85.00 20011229 20020328
2 -39.00 -85.00 20011229 20020328
2 -38.00 -85.00 20011229 20020328
2 -37.00 -85.00 20011229 20020328
2 -36.00 -85.00 20011229 20020328
2 -35.00 -85.00 20011229 20020328
2 -34.00 -85.00 20011229 20020328
2 -33.00 -85.00 20011229 20020328
2 -32.00 -85.00 20011229 20020328
2 -31.00 -85.00 20011229 20020328
2 -30.00 -85.00 20011229 20020328
2 -29.00 -85.00 20011229 20020328
2 -28.00 -85.00 20011229 20020328
2 -27.00 -85.00 20011229 20020328
2 -26.00 -85.00 20011229 20020328
2 -25.00 -85.00 20011229 20020328
2 -24.00 -85.00 20011229 20020328
2 -23.00 -85.00 20011229 20020328
2 -22.00 -85.00 20011229 20020328
2 -21.00 -85.00 20011229 20020328
2 -20.00 -85.00 20011229 20020328
2 -19.00 -85.00 20011229 20020328
2 -18.00 -85.00 20011229 20020328
2 -17.00 -85.00 20011229 20020328
2 -16.00 -85.00 20011229 20020328
2 -15.00 -85.00 20011229 20020328
2 -14.00 -85.00 20011229 20020328
2 -13.00 -85.00 20011229 20020328
2 -12.00 -85.00 20011229 20020328
2 -11.00 -85.00 20011229 20020328
2 -10.00 -85.00 20011229 20020328
2 -9.00 -85.00 20011229 20020328
2 -8.00 -85.00 20011229 20020328
2 -7.00 -85.00 20011229 20020328
2 -6.00 -85.00 20011229 20020328
2 -5.00 -85.00 20011229 20020328
2 -4.00 -85.00 20011229 20020328
2 -3.00 -85.00 20011229 20020328
2 -2.00 -85.00 20011229 20020328
2 -1.00 -85.00 20011229 20020328
2 0.00 -85.00 20011229 20020328
2 1.00 -85.00 20011229 20020328
2 2.00 -85.00 20011229 20020328
2 3.00 -85.00 20011229 20020328
2 4.00 -85.00 20011229 20020328
2 5.00 -85.00 20011229 20020328
2 6.00 -85.00 20011229 20020328
2 7.00 -85.00 20011229 20020328
2 8.00 -85.00 20011229 20020328
2 9.00 -85.00 20011229 20020328
2 10.00 -85.00 20011229 20020328
2 11.00 -85.00 20011229 20020328
2 12.00 -85.00 20011229 20020328
2 -54.00 -84.00 20011229 20020328
2 -53.00 -84.00 20011229 20020328
2 -52.00 -84.00 20011229 20020328
2 -51.00 -84.00 20011229 20020328
2 -50.00 -84.00 20011229 20020328
2 -49.00 -84.00 20011229 20020328
2 -48.00 -84.00 20011229 20020328
2 -47.00 -84.00 20011229 20020328
2 -46.00 -84.00 20011229 20020328
2 -45.00 -84.00 20011229 20020328
2 -44.00 -84.00 20011229 20020328
2 -43.00 -84.00 20011229 20020328
2 -42.00 -84.00 20011229 20020328
2 -41.00 -84.00 20011229 20020328
2 -40.00 -84.00 20011229 20020328
2 -39.00 -84.00 20011229 20020328
2 -38.00 -84.00 20011229 20020328
2 -37.00 -84.00 20011229 20020328
2 -36.00 -84.00 20011229 20020328
2 -35.00 -84.00 20011229 20020328
2 -34.00 -84.00 20011229 20020328
2 -33.00 -84.00 20011229 20020328
2 -32.00 -84.00 20011229 20020328
2 -31.00 -84.00 20011229 20020328
2 -30.00 -84.00 20011229 20020328
2 -29.00 -84.00 20011229 20020328
2 -28.00 -84.00 20011229 20020328
2 -27.00 -84.00 20011229 20020328
2 -26.00 -84.00 20011229 20020328
2 -25.00 -84.00 20011229 20020328
2 -24.00 -84.00 20011229 20020328
2 -23.00 -84.00 20011229 20020328
2 -22.00 -84.00 20011229 20020328
2 -21.00 -84.00 20011229 20020328
2 -20.00 -84.00 20011229 20020328
2 -19.00 -84.00 20011229 20020328
2 -18.00 -84.00 20011229 20020328
2 -17.00 -84.00 20011229 20020328
2 -16.00 -84.00 20011229 20020328
2 -15.00 -84.00 20011229 20020328
2 -14.00 -84.00 20011229 20020328
2 -13.00 -84.00 20011229 20020328
2 -12.00 -84.00 20011229 20020328
2 -11.00 -84.00 20011229 20020328
2 -10.00 -84.00 20011229 20020328
2 -9.00 -84.00 20011229 20020328
2 -8.00 -84.00 20011229 20020328
2 -7.00 -84.00 20011229 20020328
2 -6.00 -84.00 20011229 20020328
2 -5.00 -84.00 20011229 20020328
2 -4.00 -84.00 20011229 20020328
2 -3.00 -84.00 20011229 20020328
2 -2.00 -84.00 20011229 20020328
2 -1.00 -84.00 20011229 20020328
2 0.00 -84.00 20011229 20020328
2 -54.00 -83.00 20011229 20020328
2 -53.00 -83.00 20011229 20020328
2 -52.00 -83.00 20011229 20020328
2 -51.00 -83.00 20011229 20020328
2 -50.00 -83.00 20011229 20020328
2 -49.00 -83.00 20011229 20020328
2 -48.00 -83.00 20011229 20020328
2 -47.00 -83.00 20011229 20020328
2 -46.00 -83.00 20011229 20020328
2 -45.00 -83.00 20011229 20020328
2 -44.00 -83.00 20011229 20020328
2 -43.00 -83.00 20011229 20020328
2 -42.00 -83.00 20011229 20020328
2 -41.00 -83.00 20011229 20020328
2 -40.00 -83.00 20011229 20020328
2 -39.00 -83.00 20011229 20020328
2 -38.00 -83.00 20011229 20020328
2 -44.00 -82.00 20011229 20020328
2 -43.00 -82.00 20011229 20020328
2 -180.00 -90.00 20011230 20020329
2 -179.00 -90.00 20011230 20020329
2 -178.00 -90.00 20011230 20020329
2 -177.00 -90.00 20011230 20020329
2 -176.00 -90.00 20011230 20020329
2 -175.00 -90.00 20011230 20020329
2 -174.00 -90.00 20011230 20020329
2 -173.00 -90.00 20011230 20020329
2 -172.00 -90.00 20011230 20020329
2 -171.00 -90.00 20011230 20020329
2 -170.00 -90.00 20011230 20020329
2 -169.00 -90.00 20011230 20020329
2 -168.00 -90.00 20011230 20020329
2 -167.00 -90.00 20011230 20020329
2 -166.00 -90.00 20011230 20020329
2 -165.00 -90.00 20011230 20020329
2 -164.00 -90.00 20011230 20020329
2 -163.00 -90.00 20011230 20020329
2 -162.00 -90.00 20011230 20020329
2 -161.00 -90.00 20011230 20020329
2 -160.00 -90.00 20011230 20020329
2 -159.00 -90.00 20011230 20020329
2 -158.00 -90.00 20011230 20020329
2 -157.00 -90.00 20011230 20020329
2 -156.00 -90.00 20011230 20020329
2 -155.00 -90.00 20011230 20020329
2 -154.00 -90.00 20011230 20020329
2 -153.00 -90.00 20011230 20020329
2 -152.00 -90.00 20011230 20020329
2 -151.00 -90.00 20011230 20020329
2 -150.00 -90.00 20011230 20020329
2 -149.00 -90.00 20011230 20020329
2 -148.00 -90.00 20011230 20020329
2 -147.00 -90.00 20011230 20020329
2 -146.00 -90.00 20011230 20020329
2 -145.00 -90.00 20011230 20020329
2 -144.00 -90.00 20011230 20020329
2 -143.00 -90.00 20011230 20020329
2 -142.00 -90.00 20011230 20020329
2 -141.00 -90.00 20011230 20020329
2 -140.00 -90.00 20011230 20020329
2 -139.00 -90.00 20011230 20020329
2 -138.00 -90.00 20011230 20020329
2 -137.00 -90.00 20011230 20020329
2 -136.00 -90.00 20011230 20020329
2 -135.00 -90.00 20011230 20020329
2 -134.00 -90.00 20011230 20020329
2 -133.00 -90.00 20011230 20020329
2 -132.00 -90.00 20011230 20020329
2 -131.00 -90.00 20011230 20020329
2 -130.00 -90.00 20011230 20020329
2 -129.00 -90.00 20011230 20020329
2 -128.00 -90.00 20011230 20020329
2 -127.00 -90.00 20011230 20020329
2 -126.00 -90.00 20011230 20020329
2 -125.00 -90.00 20011230 20020329
2 -124.00 -90.00 20011230 20020329
2 -123.00 -90.00 20011230 20020329
2 -122.00 -90.00 20011230 20020329
2 -121.00 -90.00 20011230 20020329
2 -120.00 -90.00 20011230 20020329
2 -119.00 -90.00 20011230 20020329
2 -118.00 -90.00 20011230 20020329
2 -117.00 -90.00 20011230 20020329
2 -116.00 -90.00 20011230 20020329
2 -115.00 -90.00 20011230 20020329
2 -114.00 -90.00 20011230 20020329
2 -113.00 -90.00 20011230 20020329
2 -112.00 -90.00 20011230 20020329
2 -111.00 -90.00 20011230 20020329
2 -110.00 -90.00 20011230 20020329
2 -109.00 -90.00 20011230 20020329
2 -108.00 -90.00 20011230 20020329
2 -107.00 -90.00 20011230 20020329
2 -106.00 -90.00 20011230 20020329
2 -105.00 -90.00 20011230 20020329
2 -104.00 -90.00 20011230 20020329
2 -103.00 -90.00 20011230 20020329
2 -102.00 -90.00 20011230 20020329
2 -101.00 -90.00 20011230 20020329
2 -100.00 -90.00 20011230 20020329
2 -99.00 -90.00 20011230 20020329
2 -98.00 -90.00 20011230 20020329
2 -97.00 -90.00 20011230 20020329
2 -96.00 -90.00 20011230 20020329
2 -95.00 -90.00 20011230 20020329
2 -94.00 -90.00 20011230 20020329
2 -93.00 -90.00 20011230 20020329
2 -92.00 -90.00 20011230 20020329
2 -91.00 -90.00 20011230 20020329
2 -90.00 -90.00 20011230 20020329
2 -89.00 -90.00 20011230 20020329
2 -88.00 -90.00 20011230 20020329
2 -87.00 -90.00 20011230 20020329
2 -86.00 -90.00 20011230 20020329
2 -85.00 -90.00 20011230 20020329
2 -84.00 -90.00 20011230 20020329
2 -83.00 -90.00 20011230 20020329
2 -82.00 -90.00 20011230 20020329
2 -81.00 -90.00 20011230 20020329
2 -80.00 -90.00 20011230 20020329
2 -79.00 -90.00 20011230 20020329
2 -78.00 -90.00 20011230 20020329
2 -77.00 -90.00 20011230 20020329
2 -76.00 -90.00 20011230 20020329
2 -75.00 -90.00 20011230 20020329
2 -74.00 -90.00 20011230 20020329
2 -73.00 -90.00 20011230 20020329
2 -72.00 -90.00 20011230 20020329
2 -71.00 -90.00 20011230 20020329
2 -70.00 -90.00 20011230 20020329
2 -69.00 -90.00 20011230 20020329
2 -68.00 -90.00 20011230 20020329
2 -67.00 -90.00 20011230 20020329
2 -66.00 -90.00 20011230 20020329
2 -65.00 -90.00 20011230 20020329
2 -64.00 -90.00 20011230 20020329
2 -63.00 -90.00 20011230 20020329
2 -62.00 -90.00 20011230 20020329
2 -61.00 -90.00 20011230 20020329
2 -60.00 -90.00 20011230 20020329
2 -59.00 -90.00 20011230 20020329
2 -58.00 -90.00 20011230 20020329
2 -57.00 -90.00 20011230 20020329
2 -56.00 -90.00 20011230 20020329
2 -55.00 -90.00 20011230 20020329
2 -54.00 -90.00 20011230 20020329
2 -53.00 -90.00 20011230 20020329
2 -52.00 -90.00 20011230 20020329
2 -51.00 -90.00 20011230 20020329
2 -50.00 -90.00 20011230 20020329
2 -49.00 -90.00 20011230 20020329
2 -48.00 -90.00 20011230 20020329
2 -47.00 -90.00 20011230 20020329
2 -46.00 -90.00 20011230 20020329
2 -45.00 -90.00 20011230 20020329
2 -44.00 -90.00 20011230 20020329
2 -43.00 -90.00 20011230 20020329
2 -42.00 -90.00 20011230 20020329
2 -41.00 -90.00 20011230 20020329
2 -40.00 -90.00 20011230 20020329
2 -39.00 -90.00 20011230 20020329
2 -38.00 -90.00 20011230 20020329
2 -37.00 -90.00 20011230 20020329
2 -36.00 -90.00 20011230 20020329
2 -35.00 -90.00 20011230 20020329
2 -34.00 -90.00 20011230 20020329
2 -33.00 -90.00 20011230 20020329
2 -32.00 -90.00 20011230 20020329
2 -31.00 -90.00 20011230 20020329
2 -30.00 -90.00 20011230 20020329
2 -29.00 -90.00 20011230 20020329
2 -28.00 -90.00 20011230 20020329
2 -27.00 -90.00 20011230 20020329
2 -26.00 -90.00 20011230 20020329
2 -25.00 -90.00 20011230 20020329
2 -24.00 -90.00 20011230 20020329
2 -23.00 -90.00 20011230 20020329
2 -22.00 -90.00 20011230 20020329
2 -21.00 -90.00 20011230 20020329
2 -20.00 -90.00 20011230 20020329
2 -19.00 -90.00 20011230 20020329
2 -18.00 -90.00 20011230 20020329
2 -17.00 -90.00 20011230 20020329
2 -16.00 -90.00 20011230 20020329
2 -15.00 -90.00 20011230 20020329
2 -14.00 -90.00 20011230 20020329
2 -13.00 -90.00 20011230 20020329
2 -12.00 -90.00 20011230 20020329
2 -11.00 -90.00 20011230 20020329
2 -10.00 -90.00 20011230 20020329
2 -9.00 -90.00 20011230 20020329
2 -8.00 -90.00 20011230 20020329
2 -7.00 -90.00 20011230 20020329
2 -6.00 -90.00 20011230 20020329
2 -5.00 -90.00 20011230 20020329
2 -4.00 -90.00 20011230 20020329
2 -3.00 -90.00 20011230 20020329
2 -2.00 -90.00 20011230 20020329
2 -1.00 -90.00 20011230 20020329
2 0.00 -90.00 20011230 20020329
2 1.00 -90.00 20011230 20020329
2 2.00 -90.00 20011230 20020329
2 3.00 -90.00 20011230 20020329
2 4.00 -90.00 20011230 20020329
2 5.00 -90.00 20011230 20020329
2 6.00 -90.00 20011230 20020329
2 7.00 -90.00 20011230 20020329
2 8.00 -90.00 20011230 20020329
2 9.00 -90.00 20011230 20020329
2 10.00 -90.00 20011230 20020329
2 11.00 -90.00 20011230 20020329
2 12.00 -90.00 20011230 20020329
2 13.00 -90.00 20011230 20020329
2 14.00 -90.00 20011230 20020329
2 15.00 -90.00 20011230 20020329
2 16.00 -90.00 20011230 20020329
2 17.00 -90.00 20011230 20020329
2 18.00 -90.00 20011230 20020329
2 19.00 -90.00 20011230 20020329
2 20.00 -90.00 20011230 20020329
2 21.00 -90.00 20011230 20020329
2 22.00 -90.00 20011230 20020329
2 23.00 -90.00 20011230 20020329
2 24.00 -90.00 20011230 20020329
2 25.00 -90.00 20011230 20020329
2 26.00 -90.00 20011230 20020329
2 27.00 -90.00 20011230 20020329
2 28.00 -90.00 20011230 20020329
2 29.00 -90.00 20011230 20020329
2 30.00 -90.00 20011230 20020329
2 31.00 -90.00 20011230 20020329
2 32.00 -90.00 20011230 20020329
2 33.00 -90.00 20011230 20020329
2 34.00 -90.00 20011230 20020329
2 35.00 -90.00 20011230 20020329
2 36.00 -90.00 20011230 20020329
2 37.00 -90.00 20011230 20020329
2 38.00 -90.00 20011230 20020329
2 39.00 -90.00 20011230 20020329
2 40.00 -90.00 20011230 20020329
2 41.00 -90.00 20011230 20020329
2 42.00 -90.00 20011230 20020329
2 43.00 -90.00 20011230 20020329
2 44.00 -90.00 20011230 20020329
2 45.00 -90.00 20011230 20020329
2 46.00 -90.00 20011230 20020329
2 47.00 -90.00 20011230 20020329
2 48.00 -90.00 20011230 20020329
2 49.00 -90.00 20011230 20020329
2 50.00 -90.00 20011230 20020329
2 51.00 -90.00 20011230 20020329
2 52.00 -90.00 20011230 20020329
2 53.00 -90.00 20011230 20020329
2 54.00 -90.00 20011230 20020329
2 55.00 -90.00 20011230 20020329
2 56.00 -90.00 20011230 20020329
2 57.00 -90.00 20011230 20020329
2 58.00 -90.00 20011230 20020329
2 59.00 -90.00 20011230 20020329
2 60.00 -90.00 20011230 20020329
2 61.00 -90.00 20011230 20020329
2 62.00 -90.00 20011230 20020329
2 63.00 -90.00 20011230 20020329
2 64.00 -90.00 20011230 20020329
2 65.00 -90.00 20011230 20020329
2 66.00 -90.00 20011230 20020329
2 67.00 -90.00 20011230 20020329
2 68.00 -90.00 20011230 20020329
2 69.00 -90.00 20011230 20020329
2 70.00 -90.00 20011230 20020329
2 71.00 -90.00 20011230 20020329
2 72.00 -90.00 20011230 20020329
2 73.00 -90.00 20011230 20020329
2 74.00 -90.00 20011230 20020329
2 75.00 -90.00 20011230 20020329
2 76.00 -90.00 20011230 20020329
2 77.00 -90.00 20011230 20020329
2 78.00 -90.00 20011230 20020329
2 79.00 -90.00 20011230 20020329
2 80.00 -90.00 20011230 20020329
2 81.00 -90.00 20011230 20020329
2 82.00 -90.00 20011230 20020329
2 83.00 -90.00 20011230 20020329
2 84.00 -90.00 20011230 20020329
2 85.00 -90.00 20011230 20020329
2 86.00 -90.00 20011230 20020329
2 87.00 -90.00 20011230 20020329
2 88.00 -90.00 20011230 20020329
2 89.00 -90.00 20011230 20020329
2 90.00 -90.00 20011230 20020329
2 91.00 -90.00 20011230 20020329
2 92.00 -90.00 20011230 20020329
2 93.00 -90.00 20011230 20020329
2 94.00 -90.00 20011230 20020329
2 95.00 -90.00 20011230 20020329
2 96.00 -90.00 20011230 20020329
2 97.00 -90.00 20011230 20020329
2 98.00 -90.00 20011230 20020329
2 99.00 -90.00 20011230 20020329
2 100.00 -90.00 20011230 20020329
2 101.00 -90.00 20011230 20020329
2 102.00 -90.00 20011230 20020329
2 103.00 -90.00 20011230 20020329
2 104.00 -90.00 20011230 20020329
2 105.00 -90.00 20011230 20020329
2 106.00 -90.00 20011230 20020329
2 107.00 -90.00 20011230 20020329
2 108.00 -90.00 20011230 20020329
2 109.00 -90.00 20011230 20020329
2 110.00 -90.00 20011230 20020329
2 111.00 -90.00 20011230 20020329
2 112.00 -90.00 20011230 20020329
2 113.00 -90.00 20011230 20020329
2 114.00 -90.00 20011230 20020329
2 115.00 -90.00 20011230 20020329
2 116.00 -90.00 20011230 20020329
2 117.00 -90.00 20011230 20020329
2 118.00 -90.00 20011230 20020329
2 119.00 -90.00 20011230 20020329
2 120.00 -90.00 20011230 20020329
2 121.00 -90.00 20011230 20020329
2 122.00 -90.00 20011230 20020329
2 123.00 -90.00 20011230 20020329
2 124.00 -90.00 20011230 20020329
2 125.00 -90.00 20011230 20020329
2 126.00 -90.00 20011230 20020329
2 127.00 -90.00 20011230 20020329
2 128.00 -90.00 20011230 20020329
2 129.00 -90.00 20011230 20020329
2 130.00 -90.00 20011230 20020329
2 131.00 -90.00 20011230 20020329
2 132.00 -90.00 20011230 20020329
2 133.00 -90.00 20011230 20020329
2 134.00 -90.00 20011230 20020329
2 135.00 -90.00 20011230 20020329
2 136.00 -90.00 20011230 20020329
2 137.00 -90.00 20011230 20020329
2 138.00 -90.00 20011230 20020329
2 139.00 -90.00 20011230 20020329
2 140.00 -90.00 20011230 20020329
2 141.00 -90.00 20011230 20020329
2 142.00 -90.00 20011230 20020329
2 143.00 -90.00 20011230 20020329
2 144.00 -90.00 20011230 20020329
2 145.00 -90.00 20011230 20020329
2 146.00 -90.00 20011230 20020329
2 147.00 -90.00 20011230 20020329
2 148.00 -90.00 20011230 20020329
2 149.00 -90.00 20011230 20020329
2 150.00 -90.00 20011230 20020329
2 151.00 -90.00 20011230 20020329
2 152.00 -90.00 20011230 20020329
2 153.00 -90.00 20011230 20020329
2 154.00 -90.00 20011230 20020329
2 155.00 -90.00 20011230 20020329
2 156.00 -90.00 20011230 20020329
2 157.00 -90.00 20011230 20020329
2 158.00 -90.00 20011230 20020329
2 159.00 -90.00 20011230 20020329
2 160.00 -90.00 20011230 20020329
2 161.00 -90.00 20011230 20020329
2 162.00 -90.00 20011230 20020329
2 163.00 -90.00 20011230 20020329
2 164.00 -90.00 20011230 20020329
2 165.00 -90.00 20011230 20020329
2 166.00 -90.00 20011230 20020329
2 167.00 -90.00 20011230 20020329
2 168.00 -90.00 20011230 20020329
2 169.00 -90.00 20011230 20020329
2 170.00 -90.00 20011230 20020329
2 171.00 -90.00 20011230 20020329
2 172.00 -90.00 20011230 20020329
2 173.00 -90.00 20011230 20020329
2 174.00 -90.00 20011230 20020329
2 175.00 -90.00 20011230 20020329
2 176.00 -90.00 20011230 20020329
2 177.00 -90.00 20011230 20020329
2 178.00 -90.00 20011230 20020329
2 179.00 -90.00 20011230 20020329
2 -76.00 -89.00 20011230 20020329
2 -75.00 -89.00 20011230 20020329
2 -74.00 -89.00 20011230 20020329
2 -73.00 -89.00 20011230 20020329
2 -72.00 -89.00 20011230 20020329
2 -71.00 -89.00 20011230 20020329
2 -70.00 -89.00 20011230 20020329
2 -69.00 -89.00 20011230 20020329
2 -68.00 -89.00 20011230 20020329
2 -67.00 -89.00 20011230 20020329
2 -66.00 -89.00 20011230 20020329
2 -65.00 -89.00 20011230 20020329
2 -64.00 -89.00 20011230 20020329
2 -63.00 -89.00 20011230 20020329
2 -62.00 -89.00 20011230 20020329
2 -61.00 -89.00 20011230 20020329
2 -60.00 -89.00 20011230 20020329
2 -59.00 -89.00 20011230 20020329
2 -58.00 -89.00 20011230 20020329
2 -57.00 -89.00 20011230 20020329
2 -56.00 -89.00 20011230 20020329
2 -55.00 -89.00 20011230 20020329
2 -54.00 -89.00 20011230 20020329
2 -53.00 -89.00 20011230 20020329
2 -52.00 -89.00 20011230 20020329
2 -51.00 -89.00 20011230 20020329
2 -50.00 -89.00 20011230 20020329
2 -49.00 -89.00 20011230 20020329
2 -48.00 -89.00 20011230 20020329
2 -47.00 -89.00 20011230 20020329
2 -46.00 -89.00 20011230 20020329
2 -45.00 -89.00 20011230 20020329
2 -44.00 -89.00 20011230 20020329
2 -43.00 -89.00 20011230 20020329
2 -42.00 -89.00 20011230 20020329
2 -41.00 -89.00 20011230 20020329
2 -40.00 -89.00 20011230 20020329
2 -39.00 -89.00 20011230 20020329
2 -38.00 -89.00 20011230 20020329
2 -37.00 -89.00 20011230 20020329
2 -36.00 -89.00 20011230 20020329
2 -35.00 -89.00 20011230 20020329
2 -34.00 -89.00 20011230 20020329
2 -33.00 -89.00 20011230 20020329
2 -32.00 -89.00 20011230 20020329
2 -31.00 -89.00 20011230 20020329
2 -30.00 -89.00 20011230 20020329
2 -29.00 -89.00 20011230 20020329
2 -28.00 -89.00 20011230 20020329
2 -27.00 -89.00 20011230 20020329
2 -26.00 -89.00 20011230 20020329
2 -25.00 -89.00 20011230 20020329
2 -24.00 -89.00 20011230 20020329
2 -23.00 -89.00 20011230 20020329
2 -22.00 -89.00 20011230 20020329
2 -21.00 -89.00 20011230 20020329
2 -20.00 -89.00 20011230 20020329
2 -19.00 -89.00 20011230 20020329
2 -18.00 -89.00 20011230 20020329
2 -17.00 -89.00 20011230 20020329
2 -16.00 -89.00 20011230 20020329
2 -15.00 -89.00 20011230 20020329
2 -14.00 -89.00 20011230 20020329
2 -13.00 -89.00 20011230 20020329
2 -12.00 -89.00 20011230 20020329
2 -11.00 -89.00 20011230 20020329
2 -10.00 -89.00 20011230 20020329
2 -9.00 -89.00 20011230 20020329
2 -8.00 -89.00 20011230 20020329
2 -7.00 -89.00 20011230 20020329
2 -6.00 -89.00 20011230 20020329
2 -5.00 -89.00 20011230 20020329
2 -4.00 -89.00 20011230 20020329
2 -3.00 -89.00 20011230 20020329
2 -2.00 -89.00 20011230 20020329
2 -1.00 -89.00 20011230 20020329
2 0.00 -89.00 20011230 20020329
2 1.00 -89.00 20011230 20020329
2 2.00 -89.00 20011230 20020329
2 3.00 -89.00 20011230 20020329
2 4.00 -89.00 20011230 20020329
2 5.00 -89.00 20011230 20020329
2 6.00 -89.00 20011230 20020329
2 7.00 -89.00 20011230 20020329
2 8.00 -89.00 20011230 20020329
2 9.00 -89.00 20011230 20020329
2 10.00 -89.00 20011230 20020329
2 11.00 -89.00 20011230 20020329
2 12.00 -89.00 20011230 20020329
2 13.00 -89.00 20011230 20020329
2 14.00 -89.00 20011230 20020329
2 15.00 -89.00 20011230 20020329
2 16.00 -89.00 20011230 20020329
2 17.00 -89.00 20011230 20020329
2 18.00 -89.00 20011230 20020329
2 19.00 -89.00 20011230 20020329
2 20.00 -89.00 20011230 20020329
2 21.00 -89.00 20011230 20020329
2 22.00 -89.00 20011230 20020329
2 23.00 -89.00 20011230 20020329
2 24.00 -89.00 20011230 20020329
2 25.00 -89.00 20011230 20020329
2 26.00 -89.00 20011230 20020329
2 27.00 -89.00 20011230 20020329
2 28.00 -89.00 20011230 20020329
2 29.00 -89.00 20011230 20020329
2 30.00 -89.00 20011230 20020329
2 31.00 -89.00 20011230 20020329
2 32.00 -89.00 20011230 20020329
2 33.00 -89.00 20011230 20020329
2 34.00 -89.00 20011230 20020329
2 35.00 -89.00 20011230 20020329
2 36.00 -89.00 20011230 20020329
2 37.00 -89.00 20011230 20020329
2 38.00 -89.00 20011230 20020329
2 39.00 -89.00 20011230 20020329
2 40.00 -89.00 20011230 20020329
2 41.00 -89.00 20011230 20020329
2 42.00 -89.00 20011230 20020329
2 43.00 -89.00 20011230 20020329
2 44.00 -89.00 20011230 20020329
2 45.00 -89.00 20011230 20020329
2 46.00 -89.00 20011230 20020329
2 47.00 -89.00 20011230 20020329
2 48.00 -89.00 20011230 20020329
2 49.00 -89.00 20011230 20020329
2 50.00 -89.00 20011230 20020329
2 51.00 -89.00 20011230 20020329
2 52.00 -89.00 20011230 20020329
2 -16.00 -88.00 20011230 20020329
2 -15.00 -88.00 20011230 20020329
2 -14.00 -88.00 20011230 20020329
2 -13.00 -88.00 20011230 20020329
2 -12.00 -88.00 20011230 20020329
2 -11.00 -88.00 20011230 20020329
2 -10.00 -88.00 20011230 20020329
2 -9.00 -88.00 20011230 20020329
2 -8.00 -88.00 20011230 20020329
2 -7.00 -88.00 20011230 20020329
2 -6.00 -88.00 20011230 20020329
2 -5.00 -88.00 20011230 20020329
2 -4.00 -88.00 20011230 20020329
2 -3.00 -88.00 20011230 20020329
2 -2.00 -88.00 20011230 20020329
2 -1.00 -88.00 20011230 20020329
2 0.00 -88.00 20011230 20020329
2 1.00 -88.00 20011230 20020329
2 2.00 -88.00 20011230 20020329
2 3.00 -88.00 20011230 20020329
2 4.00 -88.00 20011230 20020329
2 5.00 -88.00 20011230 20020329
2 6.00 -88.00 20011230 20020329
2 7.00 -88.00 20011230 20020329
2 8.00 -88.00 20011230 20020329
2 9.00 -88.00 20011230 20020329
2 10.00 -88.00 20011230 20020329
2 11.00 -88.00 20011230 20020329
2 12.00 -88.00 20011230 20020329
2 13.00 -88.00 20011230 20020329
2 14.00 -88.00 20011230 20020329
2 15.00 -88.00 20011230 20020329
2 16.00 -88.00 20011230 20020329
2 17.00 -88.00 20011230 20020329
2 18.00 -88.00 20011230 20020329
2 19.00 -88.00 20011230 20020329
2 20.00 -88.00 20011230 20020329
2 21.00 -88.00 20011230 20020329
2 22.00 -88.00 20011230 20020329
2 23.00 -88.00 20011230 20020329
2 24.00 -88.00 20011230 20020329
2 25.00 -88.00 20011230 20020329
2 26.00 -88.00 20011230 20020329
2 27.00 -88.00 20011230 20020329
2 28.00 -88.00 20011230 20020329
2 29.00 -88.00 20011230 20020329
2 30.00 -88.00 20011230 20020329
2 31.00 -88.00 20011230 20020329
2 32.00 -88.00 20011230 20020329
2 33.00 -88.00 20011230 20020329
2 34.00 -88.00 20011230 20020329
2 35.00 -88.00 20011230 20020329
2 36.00 -88.00 20011230 20020329
2 37.00 -88.00 20011230 20020329
2 38.00 -88.00 20011230 20020329
2 39.00 -88.00 20011230 20020329
2 40.00 -88.00 20011230 20020329
2 41.00 -88.00 20011230 20020329
2 42.00 -88.00 20011230 20020329
2 43.00 -88.00 20011230 20020329
2 53.00 -88.00 20011230 20020329
2 54.00 -88.00 20011230 20020329
2 55.00 -88.00 20011230 20020329
2 56.00 -88.00 20011230 20020329
2 57.00 -88.00 20011230 20020329
2 58.00 -88.00 20011230 20020329
2 59.00 -88.00 20011230 20020329
2 60.00 -88.00 20011230 20020329
2 -3.00 -87.00 20011230 20020329
2 -2.00 -87.00 20011230 20020329
2 -1.00 -87.00 20011230 20020329
2 0.00 -87.00 20011230 20020329
2 1.00 -87.00 20011230 20020329
2 2.00 -87.00 20011230 20020329
2 3.00 -87.00 20011230 20020329
2 4.00 -87.00 20011230 20020329
2 5.00 -87.00 20011230 20020329
2 6.00 -87.00 20011230 20020329
2 7.00 -87.00 20011230 20020329
2 8.00 -87.00 20011230 20020329
2 9.00 -87.00 20011230 20020329
2 10.00 -87.00 20011230 20020329
2 11.00 -87.00 20011230 20020329
2 12.00 -87.00 20011230 20020329
2 13.00 -87.00 20011230 20020329
2 14.00 -87.00 20011230 20020329
2 15.00 -87.00 20011230 20020329
2 16.00 -87.00 20011230 20020329
2 17.00 -87.00 20011230 20020329
2 18.00 -87.00 20011230 20020329
2 19.00 -87.00 20011230 20020329
2 20.00 -87.00 20011230 20020329
2 21.00 -87.00 20011230 20020329
2 22.00 -87.00 20011230 20020329
2 23.00 -87.00 20011230 20020329
2 24.00 -87.00 20011230 20020329
2 25.00 -87.00 20011230 20020329
2 26.00 -87.00 20011230 20020329
2 27.00 -87.00 20011230 20020329
2 28.00 -87.00 20011230 20020329
2 29.00 -87.00 20011230 20020329
2 30.00 -87.00 20011230 20020329
2 31.00 -87.00 20011230 20020329
2 32.00 -87.00 20011230 20020329
2 33.00 -87.00 20011230 20020329
2 34.00 -87.00 20011230 20020329
2 35.00 -87.00 20011230 20020329
2 36.00 -87.00 20011230 20020329
2 37.00 -87.00 20011230 20020329
2 38.00 -87.00 20011230 20020329
2 -82.00 -89.00 20020118 20020417
2 -81.00 -89.00 20020118 20020417
2 -80.00 -89.00 20020118 20020417

Patch 3 of 3734, Core period: 19850809-19851106
3 -180.00 -90.00 19850808 19851105
3 -179.00 -90.00 19850808 19851105
3 -178.00 -90.00 19850808 19851105
3 -177.00 -90.00 19850808 19851105
3 -176.00 -90.00 19850808 19851105
3 -175.00 -90.00 19850808 19851105
3 -174.00 -90.00 19850808 19851105
3 -173.00 -90.00 19850808 19851105
3 -172.00 -90.00 19850808 19851105
3 -171.00 -90.00 19850808 19851105
3 -170.00 -90.00 19850808 19851105
3 -169.00 -90.00 19850808 19851105
3 -168.00 -90.00 19850808 19851105
3 -167.00 -90.00 19850808 19851105
3 -166.00 -90.00 19850808 19851105
3 -165.00 -90.00 19850808 19851105
3 -164.00 -90.00 19850808 19851105
3 -163.00 -90.00 19850808 19851105
3 -162.00 -90.00 19850808 19851105
3 -161.00 -90.00 19850808 19851105
3 -160.00 -90.00 19850808 19851105
3 -159.00 -90.00 19850808 19851105
3 -158.00 -90.00 19850808 19851105
3 -157.00 -90.00 19850808 19851105
3 -156.00 -90.00 19850808 19851105
3 -155.00 -90.00 19850808 19851105
3 -154.00 -90.00 19850808 19851105
3 -153.00 -90.00 19850808 19851105
3 -152.00 -90.00 19850808 19851105
3 -151.00 -90.00 19850808 19851105
3 -150.00 -90.00 19850808 19851105
3 -149.00 -90.00 19850808 19851105
3 -148.00 -90.00 19850808 19851105
3 -147.00 -90.00 19850808 19851105
3 -146.00 -90.00 19850808 19851105
3 -145.00 -90.00 19850808 19851105
3 -144.00 -90.00 19850808 19851105
3 -143.00 -90.00 19850808 19851105
3 -142.00 -90.00 19850808 19851105
3 -141.00 -90.00 19850808 19851105
3 -140.00 -90.00 19850808 19851105
3 -139.00 -90.00 19850808 19851105
3 -138.00 -90.00 19850808 19851105
3 -137.00 -90.00 19850808 19851105
3 -136.00 -90.00 19850808 19851105
3 -135.00 -90.00 19850808 19851105
3 -134.00 -90.00 19850808 19851105
3 -133.00 -90.00 19850808 19851105
3 -132.00 -90.00 19850808 19851105
3 -131.00 -90.00 19850808 19851105
3 -130.00 -90.00 19850808 19851105
3 -129.00 -90.00 19850808 19851105
3 -128.00 -90.00 19850808 19851105
3 -127.00 -90.00 19850808 19851105
3 -126.00 -90.00 19850808 19851105
3 -125.00 -90.00 19850808 19851105
3 -124.00 -90.00 19850808 19851105
3 -123.00 -90.00 19850808 19851105
3 -122.00 -90.00 19850808 19851105
3 -121.00 -90.00 19850808 19851105
3 -120.00 -90.00 19850808 19851105
3 -119.00 -90.00 19850808 19851105
3 -118.00 -90.00 19850808 19851105
3 -117.00 -90.00 19850808 19851105
3 -116.00 -90.00 19850808 19851105
3 -115.00 -90.00 19850808 19851105
3 -114.00 -90.00 19850808 19851105
3 -113.00 -90.00 19850808 19851105
3 -112.00 -90.00 19850808 19851105
3 -111.00 -90.00 19850808 19851105
3 -110.00 -90.00 19850808 19851105
3 -109.00 -90.00 19850808 19851105
3 -108.00 -90.00 19850808 19851105
3 -107.00 -90.00 19850808 19851105
3 -106.00 -90.00 19850808 19851105
3 -105.00 -90.00 19850808 19851105
3 -104.00 -90.00 19850808 19851105
3 -103.00 -90.00 19850808 19851105
3 -102.00 -90.00 19850808 19851105
3 -101.00 -90.00 19850808 19851105
3 -100.00 -90.00 19850808 19851105
3 -99.00 -90.00 19850808 19851105
3 -98.00 -90.00 19850808 19851105
3 -97.00 -90.00 19850808 19851105
3 -96.00 -90.00 19850808 19851105
3 -95.00 -90.00 19850808 19851105
3 -94.00 -90.00 19850808 19851105
3 -93.00 -90.00 19850808 19851105
3 -92.00 -90.00 19850808 19851105
3 -91.00 -90.00 19850808 19851105
3 -90.00 -90.00 19850808 19851105
3 -89.00 -90.00 19850808 19851105
3 -88.00 -90.00 19850808 19851105
3 -87.00 -90.00 19850808 19851105
3 -86.00 -90.00 19850808 19851105
3 -85.00 -90.00 19850808 19851105
3 -84.00 -90.00 19850808 19851105
3 -83.00 -90.00 19850808 19851105
3 -82.00 -90.00 19850808 19851105
3 -81.00 -90.00 19850808 19851105
3 -80.00 -90.00 19850808 19851105
3 -79.00 -90.00 19850808 19851105
3 -78.00 -90.00 19850808 19851105
3 -77.00 -90.00 19850808 19851105
3 -76.00 -90.00 19850808 19851105
3 -75.00 -90.00 19850808 19851105
3 -74.00 -90.00 19850808 19851105
3 -73.00 -90.00 19850808 19851105
3 -72.00 -90.00 19850808 19851105
3 -71.00 -90.00 19850808 19851105
3 -70.00 -90.00 19850808 19851105
3 -69.00 -90.00 19850808 19851105
3 -68.00 -90.00 19850808 19851105
3 -67.00 -90.00 19850808 19851105
3 -66.00 -90.00 19850808 19851105
3 -65.00 -90.00 19850808 19851105
3 -64.00 -90.00 19850808 19851105
3 -63.00 -90.00 19850808 19851105
3 -62.00 -90.00 19850808 19851105
3 -61.00 -90.00 19850808 19851105
3 -60.00 -90.00 19850808 19851105
3 -59.00 -90.00 19850808 19851105
3 -58.00 -90.00 19850808 19851105
3 -57.00 -90.00 19850808 19851105
3 -56.00 -90.00 19850808 19851105
3 -55.00 -90.00 19850808 19851105
3 -54.00 -90.00 19850808 19851105
3 -53.00 -90.00 19850808 19851105
3 -52.00 -90.00 19850808 19851105
3 -51.00 -90.00 19850808 19851105
3 -50.00 -90.00 19850808 19851105
3 -49.00 -90.00 19850808 19851105
3 -48.00 -90.00 19850808 19851105
3 -47.00 -90.00 19850808 19851105
3 -46.00 -90.00 19850808 19851105
3 -45.00 -90.00 19850808 19851105
3 -44.00 -90.00 19850808 19851105
3 -43.00 -90.00 19850808 19851105
3 -42.00 -90.00 19850808 19851105
3 -41.00 -90.00 19850808 19851105
3 -40.00 -90.00 19850808 19851105
3 -39.00 -90.00 19850808 19851105
3 -38.00 -90.00 19850808 19851105
3 -37.00 -90.00 19850808 19851105
3 -36.00 -90.00 19850808 19851105
3 -35.00 -90.00 19850808 19851105
3 -34.00 -90.00 19850808 19851105
3 -33.00 -90.00 19850808 19851105
3 -32.00 -90.00 19850808 19851105
3 -31.00 -90.00 19850808 19851105
3 -30.00 -90.00 19850808 19851105
3 -29.00 -90.00 19850808 19851105
3 -28.00 -90.00 19850808 19851105
3 -27.00 -90.00 19850808 19851105
3 -26.00 -90.00 19850808 19851105
3 -25.00 -90.00 19850808 19851105
3 -24.00 -90.00 19850808 19851105
3 -23.00 -90.00 19850808 19851105
3 -22.00 -90.00 19850808 19851105
3 -21.00 -90.00 19850808 19851105
3 -20.00 -90.00 19850808 19851105
3 -19.00 -90.00 19850808 19851105
3 -18.00 -90.00 19850808 19851105
3 -17.00 -90.00 19850808 19851105
3 -16.00 -90.00 19850808 19851105
3 -15.00 -90.00 19850808 19851105
3 -14.00 -90.00 19850808 19851105
3 -13.00 -90.00 19850808 19851105
3 -12.00 -90.00 19850808 19851105
3 -11.00 -90.00 19850808 19851105
3 -10.00 -90.00 19850808 19851105
3 -9.00 -90.00 19850808 19851105
3 -8.00 -90.00 19850808 19851105
3 -7.00 -90.00 19850808 19851105
3 -6.00 -90.00 19850808 19851105
3 -5.00 -90.00 19850808 19851105
3 -4.00 -90.00 19850808 19851105
3 -3.00 -90.00 19850808 19851105
3 -2.00 -90.00 19850808 19851105
3 -1.00 -90.00 19850808 19851105
3 0.00 -90.00 19850808 19851105
3 1.00 -90.00 19850808 19851105
3 2.00 -90.00 19850808 19851105
3 3.00 -90.00 19850808 19851105
3 4.00 -90.00 19850808 19851105
3 5.00 -90.00 19850808 19851105
3 6.00 -90.00 19850808 19851105
3 7.00 -90.00 19850808 19851105
3 8.00 -90.00 19850808 19851105
3 9.00 -90.00 19850808 19851105
3 10.00 -90.00 19850808 19851105
3 11.00 -90.00 19850808 19851105
3 12.00 -90.00 19850808 19851105
3 13.00 -90.00 19850808 19851105
3 14.00 -90.00 19850808 19851105
3 15.00 -90.00 19850808 19851105
3 16.00 -90.00 19850808 19851105
3 17.00 -90.00 19850808 19851105
3 18.00 -90.00 19850808 19851105
3 19.00 -90.00 19850808 19851105
3 20.00 -90.00 19850808 19851105
3 21.00 -90.00 19850808 19851105
3 22.00 -90.00 19850808 19851105
3 23.00 -90.00 19850808 19851105
3 24.00 -90.00 19850808 19851105
3 25.00 -90.00 19850808 19851105
3 26.00 -90.00 19850808 19851105
3 27.00 -90.00 19850808 19851105
3 28.00 -90.00 19850808 19851105
3 29.00 -90.00 19850808 19851105
3 30.00 -90.00 19850808 19851105
3 31.00 -90.00 19850808 19851105
3 32.00 -90.00 19850808 19851105
3 33.00 -90.00 19850808 19851105
3 34.00 -90.00 19850808 19851105
3 35.00 -90.00 19850808 19851105
3 36.00 -90.00 19850808 19851105
3 37.00 -90.00 19850808 19851105
3 38.00 -90.00 19850808 19851105
3 39.00 -90.00 19850808 19851105
3 40.00 -90.00 19850808 19851105
3 41.00 -90.00 19850808 19851105
3 42.00 -90.00 19850808 19851105
3 43.00 -90.00 19850808 19851105
3 44.00 -90.00 19850808 19851105
3 45.00 -90.00 19850808 19851105
3 46.00 -90.00 19850808 19851105
3 47.00 -90.00 19850808 19851105
3 48.00 -90.00 19850808 19851105
3 49.00 -90.00 19850808 19851105
3 50.00 -90.00 19850808 19851105
3 51.00 -90.00 19850808 19851105
3 52.00 -90.00 19850808 19851105
3 53.00 -90.00 19850808 19851105
3 54.00 -90.00 19850808 19851105
3 55.00 -90.00 19850808 19851105
3 56.00 -90.00 19850808 19851105
3 57.00 -90.00 19850808 19851105
3 58.00 -90.00 19850808 19851105
3 59.00 -90.00 19850808 19851105
3 60.00 -90.00 19850808 19851105
3 61.00 -90.00 19850808 19851105
3 62.00 -90.00 19850808 19851105
3 63.00 -90.00 19850808 19851105
3 64.00 -90.00 19850808 19851105
3 65.00 -90.00 19850808 19851105
3 66.00 -90.00 19850808 19851105
3 67.00 -90.00 19850808 19851105
3 68.00 -90.00 19850808 19851105
3 69.00 -90.00 19850808 19851105
3 70.00 -90.00 19850808 19851105
3 71.00 -90.00 19850808 19851105
3 72.00 -90.00 19850808 19851105
3 73.00 -90.00 19850808 19851105
3 74.00 -90.00 19850808 19851105
3 75.00 -90.00 19850808 19851105
3 76.00 -90.00 19850808 19851105
3 77.00 -90.00 19850808 19851105
3 78.00 -90.00 19850808 19851105
3 79.00 -90.00 19850808 19851105
3 80.00 -90.00 19850808 19851105
3 81.00 -90.00 19850808 19851105
3 82.00 -90.00 19850808 19851105
3 83.00 -90.00 19850808 19851105
3 84.00 -90.00 19850808 19851105
3 85.00 -90.00 19850808 19851105
3 86.00 -90.00 19850808 19851105
3 87.00 -90.00 19850808 19851105
3 88.00 -90.00 19850808 19851105
3 89.00 -90.00 19850808 19851105
3 90.00 -90.00 19850808 19851105
3 91.00 -90.00 19850808 19851105
3 92.00 -90.00 19850808 19851105
3 93.00 -90.00 19850808 19851105
3 94.00 -90.00 19850808 19851105
3 95.00 -90.00 19850808 19851105
3 96.00 -90.00 19850808 19851105
3 97.00 -90.00 19850808 19851105
3 98.00 -90.00 19850808 19851105
3 99.00 -90.00 19850808 19851105
3 100.00 -90.00 19850808 19851105
3 101.00 -90.00 19850808 19851105
3 102.00 -90.00 19850808 19851105
3 103.00 -90.00 19850808 19851105
3 104.00 -90.00 19850808 19851105
3 105.00 -90.00 19850808 19851105
3 106.00 -90.00 19850808 19851105
3 107.00 -90.00 19850808 19851105
3 108.00 -90.00 19850808 19851105
3 109.00 -90.00 19850808 19851105
3 110.00 -90.00 19850808 19851105
3 111.00 -90.00 19850808 19851105
3 112.00 -90.00 19850808 19851105
3 113.00 -90.00 19850808 19851105
3 114.00 -90.00 19850808 19851105
3 115.00 -90.00 19850808 19851105
3 116.00 -90.00 19850808 19851105
3 117.00 -90.00 19850808 19851105
3 118.00 -90.00 19850808 19851105
3 119.00 -90.00 19850808 19851105
3 120.00 -90.00 19850808 19851105
3 121.00 -90.00 19850808 19851105
3 122.00 -90.00 19850808 19851105
3 123.00 -90.00 19850808 19851105
3 124.00 -90.00 19850808 19851105
3 125.00 -90.00 19850808 19851105
3 126.00 -90.00 19850808 19851105
3 127.00 -90.00 19850808 19851105
3 128.00 -90.00 19850808 19851105
3 129.00 -90.00 19850808 19851105
3 130.00 -90.00 19850808 19851105
3 131.00 -90.00 19850808 19851105
3 132.00 -90.00 19850808 19851105
3 133.00 -90.00 19850808 19851105
3 134.00 -90.00 19850808 19851105
3 135.00 -90.00 19850808 19851105
3 136.00 -90.00 19850808 19851105
3 137.00 -90.00 19850808 19851105
3 138.00 -90.00 19850808 19851105
3 139.00 -90.00 19850808 19851105
3 140.00 -90.00 19850808 19851105
3 141.00 -90.00 19850808 19851105
3 142.00 -90.00 19850808 19851105
3 143.00 -90.00 19850808 19851105
3 144.00 -90.00 19850808 19851105
3 145.00 -90.00 19850808 19851105
3 146.00 -90.00 19850808 19851105
3 147.00 -90.00 19850808 19851105
3 148.00 -90.00 19850808 19851105
3 149.00 -90.00 19850808 19851105
3 150.00 -90.00 19850808 19851105
3 151.00 -90.00 19850808 19851105
3 152.00 -90.00 19850808 19851105
3 153.00 -90.00 19850808 19851105
3 154.00 -90.00 19850808 19851105
3 155.00 -90.00 19850808 19851105
3 156.00 -90.00 19850808 19851105
3 157.00 -90.00 19850808 19851105
3 158.00 -90.00 19850808 19851105
3 159.00 -90.00 19850808 19851105
3 160.00 -90.00 19850808 19851105
3 161.00 -90.00 19850808 19851105
3 162.00 -90.00 19850808 19851105
3 163.00 -90.00 19850808 19851105
3 164.00 -90.00 19850808 19851105
3 165.00 -90.00 19850808 19851105
3 166.00 -90.00 19850808 19851105
3 167.00 -90.00 19850808 19851105
3 168.00 -90.00 19850808 19851105
3 169.00 -90.00 19850808 19851105
3 170.00 -90.00 19850808 19851105
3 171.00 -90.00 19850808 19851105
3 172.00 -90.00 19850808 19851105
3 173.00 -90.00 19850808 19851105
3 174.00 -90.00 19850808 19851105
3 175.00 -90.00 19850808 19851105
3 176.00 -90.00 19850808 19851105
3 177.00 -90.00 19850808 19851105
3 178.00 -90.00 19850808 19851105
3 179.00 -90.00 19850808 19851105
3 -148.00 -89.00 19850808 19851105
3 -147.00 -89.00 19850808 19851105
3 -146.00 -89.00 19850808 19851105
3 -133.00 -89.00 19850808 19851105
3 -132.00 -89.00 19850808 19851105
3 -131.00 -89.00 19850808 19851105
3 -130.00 -89.00 19850808 19851105
3 -156.00 -88.00 19850808 19851105
3 -155.00 -88.00 19850808 19851105
3 -154.00 -88.00 19850809 19851106
3 -153.00 -88.00 19850809 19851106
3 -152.00 -88.00 19850809 19851106
3 -151.00 -88.00 19850809 19851106
3 -150.00 -88.00 19850809 19851106
3 -149.00 -88.00 19850809 19851106
3 -148.00 -88.00 19850809 19851106
3 -147.00 -88.00 19850809 19851106
3 -146.00 -88.00 19850809 19851106
3 -145.00 -88.00 19850809 19851106
3 -144.00 -88.00 19850809 19851106
3 -143.00 -88.00 19850809 19851106
3 -142.00 -88.00 19850809 19851106
3 -141.00 -88.00 19850809 19851106
3 -140.00 -88.00 19850809 19851106
3 -139.00 -88.00 19850809 19851106
3 -138.00 -88.00 19850809 19851106
3 -137.00 -88.00 19850809 19851106
3 -136.00 -88.00 19850809 19851106
3 -135.00 -88.00 19850809 19851106
3 -134.00 -88.00 19850809 19851106
3 -133.00 -88.00 19850809 19851106
3 -132.00 -88.00 19850809 19851106
3 -131.00 -88.00 19850809 19851106
3 -130.00 -88.00 19850809 19851106
3 52.00 -89.00 19851005 19860102
3 53.00 -89.00 19851005 19860102
3 54.00 -89.00 19851005 19860102
3 55.00 -89.00 19851005 19860102
3 70.00 -89.00 19851005 19860102
3 71.00 -89.00 19851005 19860102
3 72.00 -89.00 19851005 19860102
3 53.00 -88.00 19851005 19860102
3 54.00 -88.00 19851005 19860102
3 55.00 -88.00 19851005 19860102
3 56.00 -88.00 19851005 19860102
3 57.00 -88.00 19851005 19860102
3 61.00 -88.00 19851005 19860102
3 62.00 -88.00 19851005 19860102
3 63.00 -88.00 19851005 19860102
3 64.00 -88.00 19851005 19860102
3 65.00 -88.00 19851005 19860102
3 66.00 -88.00 19851005 19860102
3 67.00 -88.00 19851005 19860102
3 68.00 -88.00 19851005 19860102
3 69.00 -88.00 19851005 19860102
3 70.00 -88.00 19851005 19860102
3 71.00 -88.00 19851005 19860102
3 72.00 -88.00 19851005 19860102
3 47.00 -87.00 19851005 19860102
3 48.00 -87.00 19851005 19860102
3 49.00 -87.00 19851005 19860102
3 50.00 -87.00 19851005 19860102
3 51.00 -87.00 19851005 19860102
3 52.00 -87.00 19851005 19860102
3 53.00 -87.00 19851005 19860102
3 54.00 -87.00 19851005 19860102
3 55.00 -87.00 19851005 19860102
3 56.00 -87.00 19851005 19860102
3 57.00 -87.00 19851005 19860102
3 58.00 -87.00 19851005 19860102
3 59.00 -87.00 19851005 19860102
3 60.00 -87.00 19851005 19860102
3 61.00 -87.00 19851005 19860102
3 62.00 -87.00 19851005 19860102
3 63.00 -87.00 19851005 19860102
3 64.00 -87.00 19851005 19860102
3 65.00 -87.00 19851005 19860102
3 66.00 -87.00 19851005 19860102
3 67.00 -87.00 19851005 19860102
3 68.00 -87.00 19851005 19860102
3 69.00 -87.00 19851005 19860102
3 70.00 -87.00 19851005 19860102
3 71.00 -87.00 19851005 19860102
3 72.00 -87.00 19851005 19860102
3 73.00 -87.00 19851005 19860102
3 74.00 -87.00 19851005 19860102
3 75.00 -87.00 19851005 19860102
3 76.00 -87.00 19851005 19860102
3 77.00 -87.00 19851005 19860102
3 78.00 -87.00 19851005 19860102
3 79.00 -87.00 19851005 19860102
3 63.00 -86.00 19851005 19860102
3 64.00 -86.00 19851005 19860102
3 65.00 -86.00 19851005 19860102
3 66.00 -86.00 19851005 19860102
3 67.00 -86.00 19851005 19860102
3 68.00 -86.00 19851005 19860102
3 69.00 -86.00 19851005 19860102
3 70.00 -86.00 19851005 19860102
3 71.00 -86.00 19851005 19860102
3 72.00 -86.00 19851005 19860102
3 73.00 -86.00 19851005 19860102
3 74.00 -86.00 19851005 19860102
3 75.00 -86.00 19851005 19860102
3 55.00 -86.00 19851028 19860125
3 56.00 -86.00 19851028 19860125

Patch 4 of 3734, Core period: 20040323-20040620
4 -180.00 -89.00 20040322 20040619
4 -179.00 -89.00 20040322 20040619
4 -178.00 -89.00 20040322 20040619
4 -177.00 -89.00 20040322 20040619
4 -176.00 -89.00 20040322 20040619
4 -175.00 -89.00 20040322 20040619
4 -174.00 -89.00 20040322 20040619
4 -173.00 -89.00 20040322 20040619
4 -172.00 -89.00 20040322 20040619
4 -171.00 -89.00 20040322 20040619
4 -170.00 -89.00 20040322 20040619
4 -169.00 -89.00 20040322 20040619
4 -168.00 -89.00 20040322 20040619
4 -167.00 -89.00 20040322 20040619
4 167.00 -89.00 20040322 20040619
4 168.00 -89.00 20040322 20040619
4 169.00 -89.00 20040322 20040619
4 170.00 -89.00 20040322 20040619
4 171.00 -89.00 20040322 20040619
4 172.00 -89.00 20040322 20040619
4 173.00 -89.00 20040322 20040619
4 174.00 -89.00 20040322 20040619
4 175.00 -89.00 20040322 20040619
4 176.00 -89.00 20040322 20040619
4 177.00 -89.00 20040322 20040619
4 178.00 -89.00 20040322 20040619
4 179.00 -89.00 20040322 20040619
4 -168.00 -88.00 20040322 20040619
4 -167.00 -88.00 20040322 20040619

Patch 5 of 3734, Core period: 20110708-20120306
5 149.00 -77.00 20110612 20110909
5 150.00 -77.00 20110612 20110909
5 151.00 -77.00 20110612 20110909
5 157.00 -77.00 20110613 20110910
5 130.00 -79.00 20110706 20111003
5 131.00 -79.00 20110706 20111003
5 132.00 -79.00 20110706 20111003
5 130.00 -78.00 20110706 20111003
5 131.00 -78.00 20110706 20111003
5 134.00 -78.00 20110706 20111003
5 147.00 -78.00 20110706 20111003
5 148.00 -78.00 20110706 20111003
5 151.00 -78.00 20110706 20111003
5 152.00 -78.00 20110706 20111003
5 153.00 -78.00 20110706 20111003
5 165.00 -84.00 20110707 20111004
5 166.00 -84.00 20110707 20111004
5 167.00 -84.00 20110707 20111004
5 168.00 -84.00 20110707 20111004
5 169.00 -84.00 20110707 20111004
5 170.00 -84.00 20110707 20111004
5 171.00 -84.00 20110707 20111004
5 172.00 -84.00 20110707 20111004
5 173.00 -84.00 20110707 20111004
5 174.00 -84.00 20110707 20111004
5 175.00 -84.00 20110707 20111004
5 176.00 -84.00 20110707 20111004
5 177.00 -84.00 20110707 20111004
5 178.00 -84.00 20110707 20111004
5 161.00 -83.00 20110707 20111004
5 162.00 -83.00 20110707 20111004
5 163.00 -83.00 20110707 20111004
5 164.00 -83.00 20110707 20111004
5 165.00 -83.00 20110707 20111004
5 166.00 -83.00 20110707 20111004
5 167.00 -83.00 20110707 20111004
5 168.00 -83.00 20110707 20111004
5 170.00 -83.00 20110707 20111004
5 171.00 -83.00 20110707 20111004
5 172.00 -83.00 20110707 20111004
5 173.00 -83.00 20110707 20111004
5 174.00 -83.00 20110707 20111004
5 175.00 -83.00 20110707 20111004
5 176.00 -83.00 20110707 20111004
5 177.00 -83.00 20110707 20111004
5 178.00 -83.00 20110707 20111004
5 179.00 -83.00 20110707 20111004
5 147.00 -82.00 20110707 20111004
5 148.00 -82.00 20110707 20111004
5 149.00 -82.00 20110707 20111004
5 155.00 -82.00 20110707 20111004
5 156.00 -82.00 20110707 20111004
5 157.00 -82.00 20110707 20111004
5 158.00 -82.00 20110707 20111004
5 159.00 -82.00 20110707 20111004
5 160.00 -82.00 20110707 20111004
5 161.00 -82.00 20110707 20111004
5 162.00 -82.00 20110707 20111004
5 163.00 -82.00 20110707 20111004
5 164.00 -82.00 20110707 20111004
5 135.00 -81.00 20110707 20111004
5 137.00 -81.00 20110707 20111004
5 141.00 -81.00 20110707 20111004
5 142.00 -81.00 20110707 20111004
5 143.00 -81.00 20110707 20111004
5 144.00 -81.00 20110707 20111004
5 145.00 -81.00 20110707 20111004
5 146.00 -81.00 20110707 20111004
5 147.00 -81.00 20110707 20111004
5 148.00 -81.00 20110707 20111004
5 149.00 -81.00 20110707 20111004
5 153.00 -81.00 20110707 20111004
5 154.00 -81.00 20110707 20111004
5 155.00 -81.00 20110707 20111004
5 156.00 -81.00 20110707 20111004
5 157.00 -81.00 20110707 20111004
5 158.00 -81.00 20110707 20111004
5 159.00 -81.00 20110707 20111004
5 130.00 -80.00 20110707 20111004
5 131.00 -80.00 20110707 20111004
5 132.00 -80.00 20110707 20111004
5 133.00 -80.00 20110707 20111004
5 134.00 -80.00 20110707 20111004
5 135.00 -80.00 20110707 20111004
5 136.00 -80.00 20110707 20111004
5 137.00 -80.00 20110707 20111004
5 138.00 -80.00 20110707 20111004
5 139.00 -80.00 20110707 20111004
5 140.00 -80.00 20110707 20111004
5 141.00 -80.00 20110707 20111004
5 142.00 -80.00 20110707 20111004
5 143.00 -80.00 20110707 20111004
5 144.00 -80.00 20110707 20111004
5 145.00 -80.00 20110707 20111004
5 146.00 -80.00 20110707 20111004
5 147.00 -80.00 20110707 20111004
5 148.00 -80.00 20110707 20111004
5 149.00 -80.00 20110707 20111004
5 150.00 -80.00 20110707 20111004
5 151.00 -80.00 20110707 20111004
5 152.00 -80.00 20110707 20111004
5 153.00 -80.00 20110707 20111004
5 154.00 -80.00 20110707 20111004
5 155.00 -80.00 20110707 20111004
5 156.00 -80.00 20110707 20111004
5 157.00 -80.00 20110707 20111004
5 158.00 -80.00 20110707 20111004
5 159.00 -80.00 20110707 20111004
5 133.00 -79.00 20110707 20111004
5 134.00 -79.00 20110707 20111004
5 135.00 -79.00 20110707 20111004
5 136.00 -79.00 20110707 20111004
5 137.00 -79.00 20110707 20111004
5 138.00 -79.00 20110707 20111004
5 139.00 -79.00 20110707 20111004
5 140.00 -79.00 20110707 20111004
5 141.00 -79.00 20110707 20111004
5 142.00 -79.00 20110707 20111004
5 143.00 -79.00 20110707 20111004
5 144.00 -79.00 20110707 20111004
5 145.00 -79.00 20110707 20111004
5 146.00 -79.00 20110707 20111004
5 147.00 -79.00 20110707 20111004
5 148.00 -79.00 20110707 20111004
5 149.00 -79.00 20110707 20111004
5 150.00 -79.00 20110707 20111004
5 151.00 -79.00 20110707 20111004
5 152.00 -79.00 20110707 20111004
5 153.00 -79.00 20110707 20111004
5 154.00 -79.00 20110707 20111004
5 155.00 -79.00 20110707 20111004
5 156.00 -79.00 20110707 20111004
5 157.00 -79.00 20110707 20111004
5 160.00 -81.00 20110708 20111005
5 161.00 -81.00 20110708 20111005
5 162.00 -81.00 20110708 20111005
5 163.00 -81.00 20110708 20111005
5 164.00 -81.00 20110708 20111005
5 165.00 -81.00 20110708 20111005
5 166.00 -81.00 20110708 20111005
5 167.00 -81.00 20110708 20111005
5 168.00 -81.00 20110708 20111005
5 169.00 -81.00 20110708 20111005
5 170.00 -81.00 20110708 20111005
5 171.00 -81.00 20110708 20111005
5 172.00 -81.00 20110708 20111005
5 160.00 -80.00 20110708 20111005
5 161.00 -80.00 20110708 20111005
5 162.00 -80.00 20110708 20111005
5 163.00 -80.00 20110708 20111005
5 164.00 -80.00 20110708 20111005
5 165.00 -80.00 20110708 20111005
5 166.00 -80.00 20110708 20111005
5 167.00 -80.00 20110708 20111005
5 158.00 -79.00 20110708 20111005
5 159.00 -79.00 20110708 20111005
5 160.00 -79.00 20110708 20111005
5 161.00 -79.00 20110708 20111005
5 168.00 -80.00 20110712 20111009
5 169.00 -80.00 20110712 20111009
5 170.00 -80.00 20110712 20111009
5 171.00 -80.00 20110712 20111009
5 162.00 -79.00 20110712 20111009
5 163.00 -79.00 20110712 20111009
5 164.00 -79.00 20110712 20111009
5 165.00 -79.00 20110712 20111009
5 166.00 -79.00 20110712 20111009
5 167.00 -79.00 20110712 20111009
5 168.00 -79.00 20110712 20111009
5 169.00 -79.00 20110712 20111009
5 143.00 -78.00 20110712 20111009
5 144.00 -78.00 20110712 20111009
5 145.00 -78.00 20110712 20111009
5 146.00 -78.00 20110712 20111009
5 149.00 -78.00 20110712 20111009
5 150.00 -78.00 20110712 20111009
5 154.00 -78.00 20110712 20111009
5 155.00 -78.00 20110712 20111009
5 156.00 -78.00 20110712 20111009
5 157.00 -78.00 20110712 20111009
5 158.00 -78.00 20110712 20111009
5 159.00 -78.00 20110712 20111009
5 160.00 -78.00 20110712 20111009
5 161.00 -78.00 20110712 20111009
5 162.00 -78.00 20110712 20111009
5 163.00 -78.00 20110712 20111009
5 164.00 -78.00 20110712 20111009
5 165.00 -78.00 20110712 20111009
5 166.00 -78.00 20110712 20111009
5 167.00 -78.00 20110712 20111009
5 168.00 -78.00 20110712 20111009
5 169.00 -78.00 20110712 20111009
5 158.00 -77.00 20110712 20111009
5 159.00 -77.00 20110712 20111009
5 160.00 -77.00 20110712 20111009
5 156.00 -76.00 20110712 20111009
5 158.00 -76.00 20110712 20111009
5 173.00 -81.00 20110713 20111010
5 174.00 -81.00 20110713 20111010
5 175.00 -81.00 20110713 20111010
5 176.00 -81.00 20110713 20111010
5 177.00 -81.00 20110713 20111010
5 178.00 -81.00 20110713 20111010
5 164.00 -84.00 20110723 20111020
5 156.00 -83.00 20110724 20111021
5 157.00 -83.00 20110724 20111021
5 158.00 -83.00 20110724 20111021
5 159.00 -83.00 20110724 20111021
5 160.00 -83.00 20110724 20111021
5 151.00 -82.00 20110724 20111021
5 152.00 -82.00 20110724 20111021
5 153.00 -82.00 20110724 20111021
5 154.00 -82.00 20110724 20111021
5 150.00 -81.00 20110724 20111021
5 151.00 -81.00 20110724 20111021
5 152.00 -81.00 20110724 20111021
5 166.00 -86.00 20110926 20111224
5 167.00 -86.00 20110926 20111224
5 168.00 -86.00 20110926 20111224
5 169.00 -86.00 20110926 20111224
5 170.00 -86.00 20110926 20111224
5 171.00 -86.00 20110926 20111224
5 172.00 -86.00 20110926 20111224
5 173.00 -86.00 20110926 20111224
5 174.00 -86.00 20110926 20111224
5 175.00 -86.00 20110926 20111224
5 166.00 -85.00 20110926 20111224
5 167.00 -85.00 20110926 20111224
5 168.00 -85.00 20110926 20111224
5 169.00 -85.00 20110926 20111224
5 170.00 -85.00 20110926 20111224
5 171.00 -85.00 20110926 20111224
5 172.00 -85.00 20110926 20111224
5 173.00 -85.00 20110926 20111224
5 174.00 -85.00 20110926 20111224
5 175.00 -85.00 20110926 20111224
5 176.00 -85.00 20110926 20111224
5 177.00 -85.00 20110926 20111224
5 160.00 -84.00 20110928 20111226
5 162.00 -84.00 20110928 20111226
5 163.00 -84.00 20110928 20111226
5 142.00 -86.00 20111120 20120217
5 143.00 -86.00 20111120 20120217
5 144.00 -86.00 20111120 20120217
5 145.00 -86.00 20111120 20120217
5 146.00 -86.00 20111120 20120217
5 147.00 -86.00 20111120 20120217
5 148.00 -86.00 20111120 20120217
5 149.00 -86.00 20111120 20120217
5 150.00 -86.00 20111120 20120217
5 151.00 -86.00 20111120 20120217
5 152.00 -86.00 20111120 20120217
5 153.00 -86.00 20111120 20120217
5 154.00 -86.00 20111120 20120217
5 155.00 -86.00 20111120 20120217
5 156.00 -86.00 20111120 20120217
5 157.00 -86.00 20111120 20120217
5 158.00 -86.00 20111120 20120217
5 159.00 -86.00 20111120 20120217
5 160.00 -86.00 20111120 20120217
5 161.00 -86.00 20111120 20120217
5 162.00 -86.00 20111120 20120217
5 163.00 -86.00 20111120 20120217
5 164.00 -86.00 20111120 20120217
5 165.00 -86.00 20111120 20120217
5 149.00 -85.00 20111120 20120217
5 150.00 -85.00 20111120 20120217
5 151.00 -85.00 20111120 20120217
5 152.00 -85.00 20111120 20120217
5 153.00 -85.00 20111120 20120217
5 154.00 -85.00 20111120 20120217
5 155.00 -85.00 20111120 20120217
5 156.00 -85.00 20111120 20120217
5 157.00 -85.00 20111120 20120217
5 158.00 -85.00 20111120 20120217
5 159.00 -85.00 20111120 20120217
5 160.00 -85.00 20111120 20120217
5 161.00 -85.00 20111120 20120217
5 162.00 -85.00 20111120 20120217
5 163.00 -85.00 20111120 20120217
5 164.00 -85.00 20111120 20120217
5 165.00 -85.00 20111120 20120217
5 154.00 -84.00 20111120 20120217
5 155.00 -84.00 20111120 20120217
5 139.00 -85.00 20111127 20120224
5 140.00 -85.00 20111127 20120224
5 141.00 -85.00 20111127 20120224
5 142.00 -85.00 20111127 20120224
5 143.00 -85.00 20111127 20120224
5 144.00 -85.00 20111127 20120224
5 145.00 -85.00 20111127 20120224
5 146.00 -85.00 20111127 20120224
5 147.00 -85.00 20111127 20120224
5 148.00 -85.00 20111127 20120224
5 138.00 -84.00 20111127 20120224
5 139.00 -84.00 20111127 20120224
5 140.00 -84.00 20111127 20120224
5 141.00 -84.00 20111127 20120224
5 142.00 -84.00 20111127 20120224
5 143.00 -84.00 20111127 20120224
5 144.00 -84.00 20111127 20120224
5 145.00 -84.00 20111127 20120224
5 146.00 -84.00 20111127 20120224
5 147.00 -84.00 20111127 20120224
5 148.00 -84.00 20111127 20120224
5 149.00 -84.00 20111127 20120224
5 150.00 -84.00 20111127 20120224
5 151.00 -84.00 20111127 20120224
5 152.00 -84.00 20111127 20120224
5 153.00 -84.00 20111127 20120224
5 156.00 -84.00 20111127 20120224
5 157.00 -84.00 20111127 20120224
5 158.00 -84.00 20111127 20120224
5 159.00 -84.00 20111127 20120224
5 142.00 -83.00 20111127 20120224
5 144.00 -83.00 20111127 20120224
5 145.00 -83.00 20111127 20120224
5 146.00 -83.00 20111127 20120224
5 147.00 -83.00 20111127 20120224
5 148.00 -83.00 20111127 20120224
5 149.00 -83.00 20111127 20120224
5 150.00 -83.00 20111127 20120224
5 151.00 -83.00 20111127 20120224
5 152.00 -83.00 20111127 20120224
5 153.00 -83.00 20111127 20120224
5 -180.00 -87.00 20111207 20120305
5 137.00 -87.00 20111207 20120305
5 138.00 -87.00 20111207 20120305
5 139.00 -87.00 20111207 20120305
5 140.00 -87.00 20111207 20120305
5 141.00 -87.00 20111207 20120305
5 142.00 -87.00 20111207 20120305
5 143.00 -87.00 20111207 20120305
5 144.00 -87.00 20111207 20120305
5 145.00 -87.00 20111207 20120305
5 146.00 -87.00 20111207 20120305
5 147.00 -87.00 20111207 20120305
5 148.00 -87.00 20111207 20120305
5 149.00 -87.00 20111207 20120305
5 150.00 -87.00 20111207 20120305
5 151.00 -87.00 20111207 20120305
5 152.00 -87.00 20111207 20120305
5 153.00 -87.00 20111207 20120305
5 154.00 -87.00 20111207 20120305
5 155.00 -87.00 20111207 20120305
5 156.00 -87.00 20111207 20120305
5 157.00 -87.00 20111207 20120305
5 158.00 -87.00 20111207 20120305
5 159.00 -87.00 20111207 20120305
5 160.00 -87.00 20111207 20120305
5 161.00 -87.00 20111207 20120305
5 162.00 -87.00 20111207 20120305
5 163.00 -87.00 20111207 20120305
5 164.00 -87.00 20111207 20120305
5 165.00 -87.00 20111207 20120305
5 166.00 -87.00 20111207 20120305
5 167.00 -87.00 20111207 20120305
5 168.00 -87.00 20111207 20120305
5 169.00 -87.00 20111207 20120305
5 170.00 -87.00 20111207 20120305
5 171.00 -87.00 20111207 20120305
5 172.00 -87.00 20111207 20120305
5 173.00 -87.00 20111207 20120305
5 174.00 -87.00 20111207 20120305
5 175.00 -87.00 20111207 20120305
5 176.00 -87.00 20111207 20120305
5 177.00 -87.00 20111207 20120305
5 178.00 -87.00 20111207 20120305
5 179.00 -87.00 20111207 20120305
5 176.00 -86.00 20111207 20120305
5 177.00 -86.00 20111207 20120305
5 178.00 -86.00 20111207 20120305
5 179.00 -86.00 20111207 20120305
5 140.00 -89.00 20111208 20120306
5 141.00 -89.00 20111208 20120306
5 142.00 -89.00 20111208 20120306
5 143.00 -89.00 20111208 20120306
5 144.00 -89.00 20111208 20120306
5 145.00 -89.00 20111208 20120306
5 146.00 -89.00 20111208 20120306
5 147.00 -89.00 20111208 20120306
5 148.00 -89.00 20111208 20120306
5 149.00 -89.00 20111208 20120306
5 150.00 -89.00 20111208 20120306
5 151.00 -89.00 20111208 20120306
5 152.00 -89.00 20111208 20120306
5 153.00 -89.00 20111208 20120306
5 154.00 -89.00 20111208 20120306
5 155.00 -89.00 20111208 20120306
5 156.00 -89.00 20111208 20120306
5 157.00 -89.00 20111208 20120306
5 158.00 -89.00 20111208 20120306
5 159.00 -89.00 20111208 20120306
5 160.00 -89.00 20111208 20120306
5 161.00 -89.00 20111208 20120306
5 162.00 -89.00 20111208 20120306
5 163.00 -89.00 20111208 20120306
5 164.00 -89.00 20111208 20120306
5 165.00 -89.00 20111208 20120306
5 166.00 -89.00 20111208 20120306
5 167.00 -89.00 20111208 20120306
5 168.00 -89.00 20111208 20120306
5 169.00 -89.00 20111208 20120306
5 170.00 -89.00 20111208 20120306
5 171.00 -89.00 20111208 20120306
5 172.00 -89.00 20111208 20120306
5 173.00 -89.00 20111208 20120306
5 174.00 -89.00 20111208 20120306
5 -180.00 -88.00 20111208 20120306
5 -179.00 -88.00 20111208 20120306
5 -178.00 -88.00 20111208 20120306
5 -177.00 -88.00 20111208 20120306
5 133.00 -88.00 20111208 20120306
5 134.00 -88.00 20111208 20120306
5 135.00 -88.00 20111208 20120306
5 136.00 -88.00 20111208 20120306
5 137.00 -88.00 20111208 20120306
5 138.00 -88.00 20111208 20120306
5 139.00 -88.00 20111208 20120306
5 140.00 -88.00 20111208 20120306
5 141.00 -88.00 20111208 20120306
5 142.00 -88.00 20111208 20120306
5 143.00 -88.00 20111208 20120306
5 144.00 -88.00 20111208 20120306
5 145.00 -88.00 20111208 20120306
5 146.00 -88.00 20111208 20120306
5 147.00 -88.00 20111208 20120306
5 148.00 -88.00 20111208 20120306
5 149.00 -88.00 20111208 20120306
5 150.00 -88.00 20111208 20120306
5 151.00 -88.00 20111208 20120306
5 152.00 -88.00 20111208 20120306
5 153.00 -88.00 20111208 20120306
5 154.00 -88.00 20111208 20120306
5 155.00 -88.00 20111208 20120306
5 156.00 -88.00 20111208 20120306
5 157.00 -88.00 20111208 20120306
5 158.00 -88.00 20111208 20120306
5 159.00 -88.00 20111208 20120306
5 160.00 -88.00 20111208 20120306
5 161.00 -88.00 20111208 20120306
5 162.00 -88.00 20111208 20120306
5 163.00 -88.00 20111208 20120306
5 164.00 -88.00 20111208 20120306
5 165.00 -88.00 20111208 20120306
5 166.00 -88.00 20111208 20120306
5 167.00 -88.00 20111208 20120306
5 168.00 -88.00 20111208 20120306
5 169.00 -88.00 20111208 20120306
5 170.00 -88.00 20111208 20120306
5 171.00 -88.00 20111208 20120306
5 172.00 -88.00 20111208 20120306
5 173.00 -88.00 20111208 20120306
5 174.00 -88.00 20111208 20120306
5 175.00 -88.00 20111208 20120306
5 176.00 -88.00 20111208 20120306
5 177.00 -88.00 20111208 20120306
5 178.00 -88.00 20111208 20120306
5 179.00 -88.00 20111208 20120306
5 161.00 -84.00 20111213 20120311

Patch 6 of 3734, Core period: 20050814-20051118
6 -178.00 -87.00 20050718 20051015
6 -177.00 -87.00 20050718 20051015
6 -176.00 -87.00 20050718 20051015
6 -175.00 -87.00 20050718 20051015
6 -174.00 -87.00 20050718 20051015
6 -173.00 -87.00 20050718 20051015
6 -172.00 -87.00 20050719 20051016
6 -171.00 -87.00 20050719 20051016
6 -170.00 -87.00 20050719 20051016
6 -156.00 -88.00 20050812 20051109
6 -155.00 -88.00 20050812 20051109
6 -152.00 -88.00 20050812 20051109
6 -151.00 -88.00 20050812 20051109
6 -150.00 -88.00 20050812 20051109
6 -107.00 -88.00 20050812 20051109
6 -106.00 -88.00 20050812 20051109
6 -169.00 -87.00 20050812 20051109
6 -168.00 -87.00 20050812 20051109
6 -127.00 -87.00 20050812 20051109
6 -126.00 -87.00 20050812 20051109
6 -125.00 -87.00 20050812 20051109
6 -124.00 -87.00 20050812 20051109
6 -123.00 -87.00 20050812 20051109
6 -122.00 -87.00 20050812 20051109
6 -118.00 -87.00 20050812 20051109
6 -117.00 -87.00 20050812 20051109
6 -116.00 -87.00 20050812 20051109
6 -115.00 -87.00 20050812 20051109
6 -114.00 -87.00 20050812 20051109
6 -113.00 -87.00 20050812 20051109
6 -112.00 -87.00 20050812 20051109
6 -111.00 -87.00 20050812 20051109
6 -110.00 -87.00 20050812 20051109
6 -109.00 -87.00 20050812 20051109
6 -149.00 -88.00 20050813 20051110
6 -148.00 -88.00 20050813 20051110
6 -147.00 -88.00 20050813 20051110
6 -146.00 -88.00 20050813 20051110
6 -145.00 -88.00 20050813 20051110
6 -144.00 -88.00 20050813 20051110
6 -143.00 -88.00 20050813 20051110
6 -142.00 -88.00 20050813 20051110
6 -141.00 -88.00 20050813 20051110
6 -140.00 -88.00 20050813 20051110
6 -139.00 -88.00 20050813 20051110
6 -138.00 -88.00 20050813 20051110
6 -137.00 -88.00 20050813 20051110
6 -136.00 -88.00 20050813 20051110
6 -135.00 -88.00 20050813 20051110
6 -134.00 -88.00 20050813 20051110
6 -133.00 -88.00 20050813 20051110
6 -132.00 -88.00 20050813 20051110
6 -131.00 -88.00 20050813 20051110
6 -130.00 -88.00 20050813 20051110
6 -129.00 -88.00 20050813 20051110
6 -128.00 -88.00 20050813 20051110
6 -127.00 -88.00 20050813 20051110
6 -126.00 -88.00 20050813 20051110
6 -125.00 -88.00 20050813 20051110
6 -124.00 -88.00 20050813 20051110
6 -123.00 -88.00 20050813 20051110
6 -122.00 -88.00 20050813 20051110
6 -121.00 -88.00 20050813 20051110
6 -120.00 -88.00 20050813 20051110
6 -119.00 -88.00 20050813 20051110
6 -118.00 -88.00 20050813 20051110
6 -117.00 -88.00 20050813 20051110
6 -116.00 -88.00 20050813 20051110
6 -115.00 -88.00 20050813 20051110
6 -114.00 -88.00 20050813 20051110
6 -113.00 -88.00 20050813 20051110
6 -112.00 -88.00 20050813 20051110
6 -111.00 -88.00 20050813 20051110
6 -110.00 -88.00 20050813 20051110
6 -109.00 -88.00 20050813 20051110
6 -108.00 -88.00 20050813 20051110
6 -138.00 -87.00 20050813 20051110
6 -137.00 -87.00 20050813 20051110
6 -135.00 -87.00 20050813 20051110
6 -133.00 -87.00 20050813 20051110
6 -132.00 -87.00 20050813 20051110
6 -131.00 -87.00 20050813 20051110
6 -130.00 -87.00 20050813 20051110
6 -129.00 -87.00 20050813 20051110
6 -128.00 -87.00 20050813 20051110
6 -108.00 -87.00 20050813 20051110
6 -107.00 -87.00 20050813 20051110
6 -106.00 -87.00 20050813 20051110
6 -105.00 -87.00 20050813 20051110
6 -104.00 -87.00 20050813 20051110
6 -103.00 -87.00 20050813 20051110
6 -102.00 -87.00 20050813 20051110
6 -101.00 -87.00 20050813 20051110
6 -117.00 -86.00 20050813 20051110
6 -116.00 -86.00 20050813 20051110
6 -115.00 -86.00 20050813 20051110
6 -114.00 -86.00 20050813 20051110
6 -113.00 -86.00 20050813 20051110
6 -112.00 -86.00 20050813 20051110
6 -111.00 -86.00 20050813 20051110
6 -110.00 -86.00 20050813 20051110
6 -109.00 -86.00 20050813 20051110
6 -108.00 -86.00 20050813 20051110
6 -107.00 -86.00 20050813 20051110
6 -106.00 -86.00 20050813 20051110
6 -105.00 -86.00 20050813 20051110
6 -104.00 -86.00 20050813 20051110
6 -103.00 -86.00 20050813 20051110
6 -102.00 -86.00 20050813 20051110
6 -105.00 -85.00 20050813 20051110
6 -104.00 -85.00 20050813 20051110
6 -103.00 -85.00 20050813 20051110
6 -102.00 -85.00 20050813 20051110
6 -101.00 -85.00 20050813 20051110
6 -100.00 -85.00 20050813 20051110
6 -99.00 -85.00 20050813 20051110
6 -98.00 -85.00 20050813 20051110
6 -97.00 -85.00 20050813 20051110
6 -96.00 -85.00 20050813 20051110
6 -95.00 -85.00 20050813 20051110
6 -103.00 -84.00 20050813 20051110
6 -102.00 -84.00 20050813 20051110
6 -101.00 -84.00 20050813 20051110
6 -100.00 -84.00 20050813 20051110
6 -99.00 -84.00 20050813 20051110
6 -98.00 -84.00 20050813 20051110
6 -97.00 -84.00 20050813 20051110
6 -96.00 -84.00 20050813 20051110
6 -95.00 -84.00 20050813 20051110
6 -94.00 -84.00 20050813 20051110
6 -93.00 -84.00 20050813 20051110
6 -100.00 -83.00 20050813 20051110
6 -99.00 -83.00 20050813 20051110
6 -98.00 -83.00 20050813 20051110
6 -97.00 -83.00 20050813 20051110
6 -96.00 -83.00 20050813 20051110
6 -95.00 -83.00 20050813 20051110
6 -178.00 -88.00 20050820 20051117
6 -177.00 -88.00 20050820 20051117
6 -176.00 -88.00 20050820 20051117
6 -175.00 -88.00 20050820 20051117
6 -174.00 -88.00 20050820 20051117
6 -173.00 -88.00 20050820 20051117
6 -172.00 -88.00 20050820 20051117
6 -171.00 -88.00 20050820 20051117
6 -170.00 -88.00 20050820 20051117
6 -169.00 -88.00 20050820 20051117
6 -168.00 -88.00 20050820 20051117
6 -167.00 -88.00 20050820 20051117
6 -166.00 -88.00 20050820 20051117
6 -165.00 -88.00 20050820 20051117
6 -164.00 -88.00 20050820 20051117
6 -163.00 -88.00 20050820 20051117
6 -162.00 -88.00 20050820 20051117
6 -161.00 -88.00 20050820 20051117
6 -160.00 -88.00 20050820 20051117
6 -159.00 -88.00 20050820 20051117
6 -158.00 -88.00 20050820 20051117
6 -157.00 -88.00 20050820 20051117
6 -154.00 -88.00 20050820 20051117
6 -153.00 -88.00 20050820 20051117
6 -167.00 -87.00 20050820 20051117
6 -166.00 -87.00 20050820 20051117
6 -165.00 -87.00 20050820 20051117
6 -164.00 -87.00 20050820 20051117
6 -163.00 -87.00 20050820 20051117
6 -162.00 -87.00 20050820 20051117
6 -161.00 -87.00 20050820 20051117
6 -160.00 -87.00 20050820 20051117
6 -159.00 -87.00 20050820 20051117
6 -158.00 -87.00 20050820 20051117
6 -157.00 -87.00 20050820 20051117
6 -156.00 -87.00 20050820 20051117
6 -173.00 -86.00 20050820 20051117
6 -172.00 -86.00 20050820 20051117
6 -171.00 -86.00 20050820 20051117
6 -121.00 -86.00 20050825 20051122
6 -120.00 -86.00 20050825 20051122
6 -119.00 -86.00 20050825 20051122
6 -118.00 -86.00 20050825 20051122
6 -180.00 -87.00 20050916 20051214
6 -179.00 -87.00 20050916 20051214
6 178.00 -87.00 20050916 20051214
6 179.00 -87.00 20050916 20051214

Patch 7 of 3734, Core period: 20170217-20170518
7 -125.00 -85.00 20170203 20170503
7 -124.00 -85.00 20170203 20170503
7 -123.00 -85.00 20170203 20170503
7 -122.00 -85.00 20170203 20170503
7 -121.00 -85.00 20170203 20170503
7 -120.00 -85.00 20170203 20170503
7 -119.00 -85.00 20170203 20170503
7 -118.00 -85.00 20170203 20170503
7 -117.00 -85.00 20170203 20170503
7 -116.00 -85.00 20170203 20170503
7 -115.00 -85.00 20170203 20170503
7 -114.00 -85.00 20170203 20170503
7 -113.00 -85.00 20170203 20170503
7 -112.00 -85.00 20170203 20170503
7 -111.00 -85.00 20170203 20170503
7 174.00 -85.00 20170214 20170514
7 -148.00 -87.00 20170216 20170516
7 -147.00 -87.00 20170216 20170516
7 -146.00 -87.00 20170216 20170516
7 -145.00 -87.00 20170216 20170516
7 -144.00 -87.00 20170216 20170516
7 -143.00 -87.00 20170216 20170516
7 -142.00 -87.00 20170216 20170516
7 -141.00 -87.00 20170216 20170516
7 -140.00 -87.00 20170216 20170516
7 -139.00 -87.00 20170216 20170516
7 -138.00 -87.00 20170216 20170516
7 -137.00 -87.00 20170216 20170516
7 -136.00 -87.00 20170216 20170516
7 -135.00 -87.00 20170216 20170516
7 -134.00 -87.00 20170216 20170516
7 -133.00 -87.00 20170216 20170516
7 -132.00 -87.00 20170216 20170516
7 -131.00 -87.00 20170216 20170516
7 -130.00 -87.00 20170216 20170516
7 -129.00 -87.00 20170216 20170516
7 -128.00 -87.00 20170216 20170516
7 -127.00 -87.00 20170216 20170516
7 -140.00 -86.00 20170216 20170516
7 -139.00 -86.00 20170216 20170516
7 -138.00 -86.00 20170216 20170516
7 -137.00 -86.00 20170216 20170516
7 -136.00 -86.00 20170216 20170516
7 -135.00 -86.00 20170216 20170516
7 -134.00 -86.00 20170216 20170516
7 -133.00 -86.00 20170216 20170516
7 -132.00 -86.00 20170216 20170516
7 -131.00 -86.00 20170216 20170516
7 -130.00 -86.00 20170216 20170516
7 -129.00 -86.00 20170216 20170516
7 -128.00 -86.00 20170216 20170516
7 -127.00 -86.00 20170216 20170516
7 -126.00 -86.00 20170216 20170516
7 -125.00 -86.00 20170216 20170516
7 -124.00 -86.00 20170216 20170516
7 -123.00 -86.00 20170216 20170516
7 -122.00 -86.00 20170216 20170516
7 -121.00 -86.00 20170216 20170516
7 -120.00 -86.00 20170216 20170516
7 -119.00 -86.00 20170216 20170516
7 -118.00 -86.00 20170216 20170516
7 -175.00 -86.00 20170217 20170517
7 -173.00 -86.00 20170217 20170517
7 -172.00 -86.00 20170217 20170517
7 -171.00 -86.00 20170217 20170517
7 -170.00 -86.00 20170217 20170517
7 -169.00 -86.00 20170217 20170517
7 -168.00 -86.00 20170217 20170517
7 -167.00 -86.00 20170217 20170517
7 -166.00 -86.00 20170217 20170517
7 -165.00 -86.00 20170217 20170517
7 -164.00 -86.00 20170217 20170517
7 -163.00 -86.00 20170217 20170517
7 -162.00 -86.00 20170217 20170517
7 -161.00 -86.00 20170217 20170517
7 -160.00 -86.00 20170217 20170517
7 -159.00 -86.00 20170217 20170517
7 -158.00 -86.00 20170217 20170517
7 -157.00 -86.00 20170217 20170517
7 -156.00 -86.00 20170217 20170517
7 -155.00 -86.00 20170217 20170517
7 -154.00 -86.00 20170217 20170517
7 -153.00 -86.00 20170217 20170517
7 -152.00 -86.00 20170217 20170517
7 -151.00 -86.00 20170217 20170517
7 -150.00 -86.00 20170217 20170517
7 -149.00 -86.00 20170217 20170517
7 -148.00 -86.00 20170217 20170517
7 -147.00 -86.00 20170217 20170517
7 -146.00 -86.00 20170217 20170517
7 -145.00 -86.00 20170217 20170517
7 -144.00 -86.00 20170217 20170517
7 -143.00 -86.00 20170217 20170517
7 -142.00 -86.00 20170217 20170517
7 -141.00 -86.00 20170217 20170517
7 -180.00 -85.00 20170217 20170517
7 -179.00 -85.00 20170217 20170517
7 -178.00 -85.00 20170217 20170517
7 -177.00 -85.00 20170217 20170517
7 -176.00 -85.00 20170217 20170517
7 -175.00 -85.00 20170217 20170517
7 -174.00 -85.00 20170217 20170517
7 -173.00 -85.00 20170217 20170517
7 -172.00 -85.00 20170217 20170517
7 -171.00 -85.00 20170217 20170517
7 -170.00 -85.00 20170217 20170517
7 -169.00 -85.00 20170217 20170517
7 -168.00 -85.00 20170217 20170517
7 -167.00 -85.00 20170217 20170517
7 -166.00 -85.00 20170217 20170517
7 175.00 -85.00 20170217 20170517
7 176.00 -85.00 20170217 20170517
7 177.00 -85.00 20170217 20170517
7 178.00 -85.00 20170217 20170517
7 179.00 -85.00 20170217 20170517
7 175.00 -84.00 20170217 20170517
7 176.00 -84.00 20170217 20170517
7 177.00 -84.00 20170217 20170517

Patch 8 of 3734, Core period: 19800204-19800627
8 -159.00 -78.00 19791201 19800228
8 -158.00 -78.00 19791201 19800228
8 -157.00 -78.00 19791201 19800228
8 -130.00 -81.00 19791202 19800229
8 -129.00 -81.00 19791202 19800229
8 -128.00 -81.00 19791202 19800229
8 -127.00 -81.00 19791202 19800229
8 -150.00 -79.00 19791202 19800229
8 -133.00 -77.00 19791221 19800319
8 -132.00 -77.00 19791221 19800319
8 -131.00 -77.00 19791221 19800319
8 -126.00 -81.00 19791223 19800321
8 -125.00 -81.00 19791223 19800321
8 -124.00 -81.00 19791223 19800321
8 -123.00 -81.00 19791223 19800321
8 -122.00 -81.00 19791223 19800321
8 -121.00 -81.00 19791223 19800321
8 -148.00 -79.00 19791223 19800321
8 -147.00 -79.00 19791223 19800321
8 -136.00 -82.00 19800107 19800405
8 -135.00 -82.00 19800107 19800405
8 -175.00 -75.00 19800107 19800405
8 -134.00 -82.00 19800108 19800406
8 -133.00 -82.00 19800108 19800406
8 -136.00 -81.00 19800108 19800406
8 -132.00 -82.00 19800109 19800407
8 -131.00 -82.00 19800109 19800407
8 -130.00 -82.00 19800109 19800407
8 -129.00 -82.00 19800109 19800407
8 -128.00 -82.00 19800109 19800407
8 -127.00 -82.00 19800109 19800407
8 -126.00 -82.00 19800109 19800407
8 -125.00 -82.00 19800109 19800407
8 -124.00 -82.00 19800109 19800407
8 -123.00 -82.00 19800109 19800407
8 -122.00 -82.00 19800109 19800407
8 -121.00 -82.00 19800109 19800407
8 -120.00 -82.00 19800109 19800407
8 -119.00 -82.00 19800109 19800407
8 -135.00 -81.00 19800109 19800407
8 -134.00 -81.00 19800109 19800407
8 -133.00 -81.00 19800109 19800407
8 -132.00 -81.00 19800109 19800407
8 -131.00 -81.00 19800109 19800407
8 -120.00 -81.00 19800109 19800407
8 -119.00 -81.00 19800110 19800408
8 -118.00 -81.00 19800110 19800408
8 -117.00 -81.00 19800110 19800408
8 -116.00 -81.00 19800110 19800408
8 -115.00 -81.00 19800110 19800408
8 -124.00 -80.00 19800111 19800409
8 -123.00 -80.00 19800111 19800409
8 -122.00 -80.00 19800111 19800409
8 -121.00 -80.00 19800111 19800409
8 -120.00 -80.00 19800111 19800409
8 -119.00 -80.00 19800111 19800409
8 -118.00 -80.00 19800111 19800409
8 -117.00 -80.00 19800111 19800409
8 -116.00 -80.00 19800111 19800409
8 -115.00 -80.00 19800111 19800409
8 -114.00 -80.00 19800111 19800409
8 -134.00 -77.00 19800113 19800411
8 -124.00 -77.00 19800113 19800411
8 -118.00 -82.00 19800123 19800421
8 -137.00 -77.00 19800124 19800422
8 -114.00 -81.00 19800125 19800423
8 -143.00 -77.00 19800125 19800423
8 -138.00 -77.00 19800125 19800423
8 -117.00 -82.00 19800126 19800424
8 -146.00 -79.00 19800127 19800425
8 -136.00 -77.00 19800127 19800425
8 -135.00 -77.00 19800127 19800425
8 -130.00 -77.00 19800127 19800425
8 -129.00 -77.00 19800127 19800425
8 -128.00 -77.00 19800127 19800425
8 -127.00 -77.00 19800127 19800425
8 -126.00 -77.00 19800127 19800425
8 -125.00 -77.00 19800127 19800425
8 -145.00 -79.00 19800128 19800426
8 -144.00 -79.00 19800128 19800426
8 -143.00 -79.00 19800128 19800426
8 -152.00 -76.00 19800131 19800429
8 -151.00 -76.00 19800131 19800429
8 -150.00 -76.00 19800131 19800429
8 -152.00 -75.00 19800131 19800429
8 -151.00 -75.00 19800131 19800429
8 -150.00 -75.00 19800131 19800429
8 -149.00 -75.00 19800131 19800429
8 -150.00 -74.00 19800131 19800429
8 -149.00 -74.00 19800131 19800429
8 -148.00 -74.00 19800131 19800429
8 -147.00 -74.00 19800131 19800429
8 -146.00 -74.00 19800131 19800429
8 -150.00 -73.00 19800131 19800429
8 -149.00 -73.00 19800131 19800429
8 -142.00 -79.00 19800201 19800430
8 -150.00 -78.00 19800201 19800430
8 -149.00 -78.00 19800201 19800430
8 -148.00 -78.00 19800201 19800430
8 -147.00 -78.00 19800201 19800430
8 -146.00 -78.00 19800201 19800430
8 -145.00 -78.00 19800201 19800430
8 -144.00 -78.00 19800201 19800430
8 -143.00 -78.00 19800201 19800430
8 -142.00 -78.00 19800201 19800430
8 -141.00 -78.00 19800201 19800430
8 -151.00 -77.00 19800201 19800430
8 -150.00 -77.00 19800201 19800430
8 -149.00 -77.00 19800201 19800430
8 -148.00 -77.00 19800201 19800430
8 -147.00 -77.00 19800201 19800430
8 -146.00 -77.00 19800201 19800430
8 -145.00 -77.00 19800201 19800430
8 -144.00 -77.00 19800201 19800430
8 -142.00 -77.00 19800201 19800430
8 -141.00 -77.00 19800201 19800430
8 -140.00 -77.00 19800201 19800430
8 -139.00 -77.00 19800201 19800430
8 -149.00 -76.00 19800201 19800430
8 -148.00 -76.00 19800201 19800430
8 -147.00 -76.00 19800201 19800430
8 -148.00 -75.00 19800201 19800430
8 -147.00 -75.00 19800201 19800430
8 -146.00 -75.00 19800201 19800430
8 -145.00 -75.00 19800201 19800430
8 -148.00 -73.00 19800201 19800430
8 -147.00 -73.00 19800201 19800430
8 -146.00 -73.00 19800201 19800430
8 -145.00 -73.00 19800201 19800430
8 -149.00 -72.00 19800201 19800430
8 -148.00 -72.00 19800201 19800430
8 -147.00 -72.00 19800201 19800430
8 -146.00 -72.00 19800201 19800430
8 -145.00 -72.00 19800201 19800430
8 -148.00 -71.00 19800201 19800430
8 -116.00 -82.00 19800202 19800501
8 -115.00 -82.00 19800202 19800501
8 -114.00 -82.00 19800202 19800501
8 -141.00 -79.00 19800202 19800501
8 -140.00 -79.00 19800202 19800501
8 -139.00 -79.00 19800202 19800501
8 -138.00 -79.00 19800202 19800501
8 -137.00 -79.00 19800202 19800501
8 -140.00 -78.00 19800202 19800501
8 -139.00 -78.00 19800202 19800501
8 -138.00 -78.00 19800202 19800501
8 -137.00 -78.00 19800202 19800501
8 -136.00 -78.00 19800202 19800501
8 -135.00 -78.00 19800202 19800501
8 -134.00 -78.00 19800202 19800501
8 -133.00 -78.00 19800202 19800501
8 -132.00 -78.00 19800202 19800501
8 -131.00 -78.00 19800202 19800501
8 -130.00 -78.00 19800202 19800501
8 -129.00 -78.00 19800202 19800501
8 -146.00 -76.00 19800202 19800501
8 -145.00 -76.00 19800202 19800501
8 -144.00 -76.00 19800202 19800501
8 -143.00 -76.00 19800202 19800501
8 -142.00 -76.00 19800202 19800501
8 -141.00 -76.00 19800202 19800501
8 -140.00 -76.00 19800202 19800501
8 -139.00 -76.00 19800202 19800501
8 -138.00 -76.00 19800202 19800501
8 -133.00 -76.00 19800202 19800501
8 -144.00 -75.00 19800202 19800501
8 -143.00 -75.00 19800202 19800501
8 -142.00 -75.00 19800202 19800501
8 -141.00 -75.00 19800202 19800501
8 -140.00 -75.00 19800202 19800501
8 -139.00 -75.00 19800202 19800501
8 -138.00 -75.00 19800202 19800501
8 -137.00 -75.00 19800202 19800501
8 -136.00 -75.00 19800202 19800501
8 -132.00 -75.00 19800202 19800501
8 -131.00 -75.00 19800202 19800501
8 -145.00 -74.00 19800202 19800501
8 -144.00 -74.00 19800202 19800501
8 -143.00 -74.00 19800202 19800501
8 -142.00 -74.00 19800202 19800501
8 -141.00 -74.00 19800202 19800501
8 -140.00 -74.00 19800202 19800501
8 -139.00 -74.00 19800202 19800501
8 -138.00 -74.00 19800202 19800501
8 -137.00 -74.00 19800202 19800501
8 -136.00 -74.00 19800202 19800501
8 -144.00 -73.00 19800202 19800501
8 -143.00 -73.00 19800202 19800501
8 -142.00 -73.00 19800202 19800501
8 -141.00 -73.00 19800202 19800501
8 -140.00 -73.00 19800202 19800501
8 -139.00 -73.00 19800202 19800501
8 -149.00 -71.00 19800202 19800501
8 -130.00 -87.00 19800203 19800502
8 -111.00 -84.00 19800203 19800502
8 -110.00 -84.00 19800203 19800502
8 -109.00 -84.00 19800203 19800502
8 -108.00 -84.00 19800203 19800502
8 -107.00 -84.00 19800203 19800502
8 -106.00 -84.00 19800203 19800502
8 -105.00 -84.00 19800203 19800502
8 -104.00 -84.00 19800203 19800502
8 -103.00 -84.00 19800203 19800502
8 -114.00 -83.00 19800203 19800502
8 -113.00 -83.00 19800203 19800502
8 -112.00 -83.00 19800203 19800502
8 -111.00 -83.00 19800203 19800502
8 -110.00 -83.00 19800203 19800502
8 -109.00 -83.00 19800203 19800502
8 -108.00 -83.00 19800203 19800502
8 -107.00 -83.00 19800203 19800502
8 -106.00 -83.00 19800203 19800502
8 -105.00 -83.00 19800203 19800502
8 -104.00 -83.00 19800203 19800502
8 -103.00 -83.00 19800203 19800502
8 -102.00 -83.00 19800203 19800502
8 -101.00 -83.00 19800203 19800502
8 -100.00 -83.00 19800203 19800502
8 -113.00 -82.00 19800203 19800502
8 -112.00 -82.00 19800203 19800502
8 -111.00 -82.00 19800203 19800502
8 -110.00 -82.00 19800203 19800502
8 -109.00 -82.00 19800203 19800502
8 -108.00 -82.00 19800203 19800502
8 -107.00 -82.00 19800203 19800502
8 -106.00 -82.00 19800203 19800502
8 -105.00 -82.00 19800203 19800502
8 -104.00 -82.00 19800203 19800502
8 -103.00 -82.00 19800203 19800502
8 -102.00 -82.00 19800203 19800502
8 -113.00 -81.00 19800203 19800502
8 -112.00 -81.00 19800203 19800502
8 -111.00 -81.00 19800203 19800502
8 -110.00 -81.00 19800203 19800502
8 -109.00 -81.00 19800203 19800502
8 -108.00 -81.00 19800203 19800502
8 -107.00 -81.00 19800203 19800502
8 -106.00 -81.00 19800203 19800502
8 -105.00 -81.00 19800203 19800502
8 -136.00 -79.00 19800203 19800502
8 -135.00 -79.00 19800203 19800502
8 -134.00 -79.00 19800203 19800502
8 -128.00 -78.00 19800203 19800502
8 -127.00 -78.00 19800203 19800502
8 -126.00 -78.00 19800203 19800502
8 -125.00 -78.00 19800203 19800502
8 -124.00 -78.00 19800203 19800502
8 -123.00 -78.00 19800203 19800502
8 -122.00 -78.00 19800203 19800502
8 -121.00 -78.00 19800203 19800502
8 -120.00 -78.00 19800203 19800502
8 -119.00 -78.00 19800203 19800502
8 -123.00 -77.00 19800203 19800502
8 -148.00 -80.00 19800205 19800504
8 -137.00 -87.00 19800206 19800505
8 -136.00 -87.00 19800206 19800505
8 -135.00 -87.00 19800206 19800505
8 -134.00 -87.00 19800206 19800505
8 -133.00 -87.00 19800206 19800505
8 -132.00 -87.00 19800206 19800505
8 -131.00 -87.00 19800206 19800505
8 -134.00 -86.00 19800206 19800505
8 -133.00 -86.00 19800206 19800505
8 -122.00 -85.00 19800206 19800505
8 -121.00 -85.00 19800206 19800505
8 -120.00 -85.00 19800206 19800505
8 -119.00 -85.00 19800206 19800505
8 -118.00 -85.00 19800206 19800505
8 -117.00 -85.00 19800206 19800505
8 -116.00 -85.00 19800206 19800505
8 -115.00 -85.00 19800206 19800505
8 -114.00 -85.00 19800206 19800505
8 -113.00 -85.00 19800206 19800505
8 -112.00 -85.00 19800206 19800505
8 -118.00 -84.00 19800206 19800505
8 -117.00 -84.00 19800206 19800505
8 -116.00 -84.00 19800206 19800505
8 -115.00 -84.00 19800206 19800505
8 -114.00 -84.00 19800206 19800505
8 -113.00 -84.00 19800206 19800505
8 -112.00 -84.00 19800206 19800505
8 -156.00 -78.00 19800206 19800505
8 -154.00 -78.00 19800206 19800505
8 -153.00 -78.00 19800206 19800505
8 -152.00 -78.00 19800206 19800505
8 -151.00 -78.00 19800206 19800505
8 -153.00 -77.00 19800206 19800505
8 -152.00 -77.00 19800206 19800505
8 -154.00 -77.00 19800207 19800506
8 -159.00 -76.00 19800207 19800506
8 -154.00 -75.00 19800207 19800506
8 -153.00 -75.00 19800207 19800506
8 -151.00 -74.00 19800207 19800506
8 -151.00 -73.00 19800207 19800506
8 -151.00 -71.00 19800207 19800506
8 -150.00 -71.00 19800207 19800506
8 -161.00 -81.00 19800208 19800507
8 -160.00 -81.00 19800208 19800507
8 -159.00 -81.00 19800208 19800507
8 -173.00 -80.00 19800208 19800507
8 -172.00 -80.00 19800208 19800507
8 -171.00 -80.00 19800208 19800507
8 -170.00 -80.00 19800208 19800507
8 -169.00 -80.00 19800208 19800507
8 -168.00 -80.00 19800208 19800507
8 -167.00 -80.00 19800208 19800507
8 -166.00 -80.00 19800208 19800507
8 -165.00 -80.00 19800208 19800507
8 -164.00 -80.00 19800208 19800507
8 -162.00 -80.00 19800208 19800507
8 -151.00 -80.00 19800208 19800507
8 -150.00 -80.00 19800208 19800507
8 -149.00 -80.00 19800208 19800507
8 -170.00 -79.00 19800208 19800507
8 -169.00 -79.00 19800208 19800507
8 -168.00 -79.00 19800208 19800507
8 -159.00 -79.00 19800208 19800507
8 -158.00 -79.00 19800208 19800507
8 -157.00 -79.00 19800208 19800507
8 -156.00 -79.00 19800208 19800507
8 -155.00 -79.00 19800208 19800507
8 -154.00 -79.00 19800208 19800507
8 -153.00 -79.00 19800208 19800507
8 -152.00 -79.00 19800208 19800507
8 -151.00 -79.00 19800208 19800507
8 -149.00 -79.00 19800208 19800507
8 -162.00 -78.00 19800208 19800507
8 -161.00 -78.00 19800208 19800507
8 -160.00 -78.00 19800208 19800507
8 -155.00 -78.00 19800208 19800507
8 -167.00 -77.00 19800208 19800507
8 -166.00 -77.00 19800208 19800507
8 -165.00 -77.00 19800208 19800507
8 -164.00 -77.00 19800208 19800507
8 -163.00 -77.00 19800208 19800507
8 -162.00 -77.00 19800208 19800507
8 -161.00 -77.00 19800208 19800507
8 -160.00 -77.00 19800208 19800507
8 -159.00 -77.00 19800208 19800507
8 -158.00 -77.00 19800208 19800507
8 -157.00 -77.00 19800208 19800507
8 -156.00 -77.00 19800208 19800507
8 -155.00 -77.00 19800208 19800507
8 -158.00 -76.00 19800208 19800507
8 -157.00 -76.00 19800208 19800507
8 -156.00 -76.00 19800208 19800507
8 -155.00 -76.00 19800208 19800507
8 -154.00 -76.00 19800208 19800507
8 -153.00 -76.00 19800208 19800507
8 -135.00 -83.00 19800209 19800508
8 -134.00 -83.00 19800209 19800508
8 -133.00 -83.00 19800209 19800508
8 -132.00 -83.00 19800209 19800508
8 -131.00 -83.00 19800209 19800508
8 -130.00 -83.00 19800209 19800508
8 -129.00 -83.00 19800209 19800508
8 -128.00 -83.00 19800209 19800508
8 -127.00 -83.00 19800209 19800508
8 -126.00 -83.00 19800209 19800508
8 -125.00 -83.00 19800209 19800508
8 -124.00 -83.00 19800209 19800508
8 -123.00 -83.00 19800209 19800508
8 -122.00 -83.00 19800209 19800508
8 -121.00 -83.00 19800209 19800508
8 -120.00 -83.00 19800209 19800508
8 -119.00 -83.00 19800209 19800508
8 -118.00 -83.00 19800209 19800508
8 -117.00 -83.00 19800209 19800508
8 -115.00 -83.00 19800209 19800508
8 -143.00 -82.00 19800209 19800508
8 -142.00 -82.00 19800209 19800508
8 -141.00 -82.00 19800209 19800508
8 -140.00 -82.00 19800209 19800508
8 -139.00 -82.00 19800209 19800508
8 -138.00 -82.00 19800209 19800508
8 -137.00 -82.00 19800209 19800508
8 170.00 -80.00 19800217 19800516
8 -170.00 -78.00 19800224 19800523
8 -169.00 -78.00 19800224 19800523
8 -168.00 -78.00 19800224 19800523
8 -167.00 -78.00 19800224 19800523
8 -173.00 -77.00 19800224 19800523
8 -172.00 -77.00 19800224 19800523
8 -171.00 -77.00 19800224 19800523
8 -176.00 -76.00 19800224 19800523
8 -175.00 -76.00 19800224 19800523
8 -176.00 -83.00 19800225 19800524
8 -175.00 -83.00 19800225 19800524
8 -174.00 -83.00 19800225 19800524
8 -173.00 -83.00 19800225 19800524
8 -172.00 -83.00 19800225 19800524
8 -171.00 -83.00 19800225 19800524
8 -170.00 -83.00 19800225 19800524
8 -169.00 -83.00 19800225 19800524
8 -168.00 -83.00 19800225 19800524
8 -167.00 -83.00 19800225 19800524
8 -166.00 -83.00 19800225 19800524
8 -165.00 -83.00 19800225 19800524
8 -164.00 -83.00 19800225 19800524
8 -163.00 -83.00 19800225 19800524
8 -162.00 -83.00 19800225 19800524
8 -161.00 -83.00 19800225 19800524
8 -160.00 -83.00 19800225 19800524
8 -154.00 -83.00 19800225 19800524
8 -153.00 -83.00 19800225 19800524
8 -152.00 -83.00 19800225 19800524
8 -151.00 -83.00 19800225 19800524
8 -150.00 -83.00 19800225 19800524
8 -149.00 -83.00 19800225 19800524
8 -148.00 -83.00 19800225 19800524
8 -147.00 -83.00 19800225 19800524
8 -146.00 -83.00 19800225 19800524
8 -145.00 -83.00 19800225 19800524
8 -144.00 -83.00 19800225 19800524
8 -143.00 -83.00 19800225 19800524
8 -142.00 -83.00 19800225 19800524
8 -141.00 -83.00 19800225 19800524
8 -140.00 -83.00 19800225 19800524
8 -139.00 -83.00 19800225 19800524
8 -138.00 -83.00 19800225 19800524
8 -137.00 -83.00 19800225 19800524
8 -136.00 -83.00 19800225 19800524
8 -180.00 -82.00 19800225 19800524
8 -179.00 -82.00 19800225 19800524
8 -178.00 -82.00 19800225 19800524
8 -177.00 -82.00 19800225 19800524
8 -176.00 -82.00 19800225 19800524
8 -175.00 -82.00 19800225 19800524
8 -167.00 -82.00 19800225 19800524
8 -166.00 -82.00 19800225 19800524
8 -165.00 -82.00 19800225 19800524
8 -164.00 -82.00 19800225 19800524
8 -163.00 -82.00 19800225 19800524
8 -162.00 -82.00 19800225 19800524
8 -161.00 -82.00 19800225 19800524
8 -160.00 -82.00 19800225 19800524
8 -159.00 -82.00 19800225 19800524
8 -158.00 -82.00 19800225 19800524
8 -157.00 -82.00 19800225 19800524
8 -156.00 -82.00 19800225 19800524
8 -155.00 -82.00 19800225 19800524
8 -154.00 -82.00 19800225 19800524
8 -153.00 -82.00 19800225 19800524
8 -152.00 -82.00 19800225 19800524
8 -151.00 -82.00 19800225 19800524
8 -150.00 -82.00 19800225 19800524
8 -149.00 -82.00 19800225 19800524
8 -148.00 -82.00 19800225 19800524
8 -147.00 -82.00 19800225 19800524
8 -146.00 -82.00 19800225 19800524
8 -145.00 -82.00 19800225 19800524
8 -144.00 -82.00 19800225 19800524
8 175.00 -82.00 19800225 19800524
8 176.00 -82.00 19800225 19800524
8 177.00 -82.00 19800225 19800524
8 178.00 -82.00 19800225 19800524
8 179.00 -82.00 19800225 19800524
8 -179.00 -81.00 19800225 19800524
8 -157.00 -81.00 19800225 19800524
8 -156.00 -81.00 19800225 19800524
8 -155.00 -81.00 19800225 19800524
8 -154.00 -81.00 19800225 19800524
8 -153.00 -81.00 19800225 19800524
8 -152.00 -81.00 19800225 19800524
8 -151.00 -81.00 19800225 19800524
8 -150.00 -81.00 19800225 19800524
8 -149.00 -81.00 19800225 19800524
8 -148.00 -81.00 19800225 19800524
8 -147.00 -81.00 19800225 19800524
8 -146.00 -81.00 19800225 19800524
8 -145.00 -81.00 19800225 19800524
8 -144.00 -81.00 19800225 19800524
8 -143.00 -81.00 19800225 19800524
8 -142.00 -81.00 19800225 19800524
8 -141.00 -81.00 19800225 19800524
8 -140.00 -81.00 19800225 19800524
8 -139.00 -81.00 19800225 19800524
8 -138.00 -81.00 19800225 19800524
8 -137.00 -81.00 19800225 19800524
8 169.00 -81.00 19800225 19800524
8 170.00 -81.00 19800225 19800524
8 171.00 -81.00 19800225 19800524
8 172.00 -81.00 19800225 19800524
8 173.00 -81.00 19800225 19800524
8 174.00 -81.00 19800225 19800524
8 175.00 -81.00 19800225 19800524
8 176.00 -81.00 19800225 19800524
8 177.00 -81.00 19800225 19800524
8 178.00 -81.00 19800225 19800524
8 -180.00 -80.00 19800225 19800524
8 -179.00 -80.00 19800225 19800524
8 -178.00 -80.00 19800225 19800524
8 -177.00 -80.00 19800225 19800524
8 -176.00 -80.00 19800225 19800524
8 -175.00 -80.00 19800225 19800524
8 -174.00 -80.00 19800225 19800524
8 -156.00 -80.00 19800225 19800524
8 -155.00 -80.00 19800225 19800524
8 -154.00 -80.00 19800225 19800524
8 -153.00 -80.00 19800225 19800524
8 -152.00 -80.00 19800225 19800524
8 -147.00 -80.00 19800225 19800524
8 -146.00 -80.00 19800225 19800524
8 -180.00 -79.00 19800225 19800524
8 -179.00 -79.00 19800225 19800524
8 -178.00 -79.00 19800225 19800524
8 -177.00 -79.00 19800225 19800524
8 -176.00 -79.00 19800225 19800524
8 -175.00 -79.00 19800225 19800524
8 -174.00 -79.00 19800225 19800524
8 -173.00 -79.00 19800225 19800524
8 -172.00 -79.00 19800225 19800524
8 -171.00 -79.00 19800225 19800524
8 -179.00 -78.00 19800225 19800524
8 -178.00 -78.00 19800225 19800524
8 -177.00 -78.00 19800225 19800524
8 -176.00 -78.00 19800225 19800524
8 -175.00 -78.00 19800225 19800524
8 -174.00 -78.00 19800225 19800524
8 -173.00 -78.00 19800225 19800524
8 -172.00 -78.00 19800225 19800524
8 -171.00 -78.00 19800225 19800524
8 -178.00 -77.00 19800225 19800524
8 -177.00 -77.00 19800225 19800524
8 -176.00 -77.00 19800225 19800524
8 -175.00 -77.00 19800225 19800524
8 -174.00 -77.00 19800225 19800524
8 -170.00 -77.00 19800225 19800524
8 -169.00 -77.00 19800225 19800524
8 -168.00 -77.00 19800225 19800524
8 -159.00 -83.00 19800226 19800525
8 -158.00 -83.00 19800226 19800525
8 -157.00 -83.00 19800226 19800525
8 -156.00 -83.00 19800226 19800525
8 -155.00 -83.00 19800226 19800525
8 -174.00 -82.00 19800226 19800525
8 -173.00 -82.00 19800226 19800525
8 -172.00 -82.00 19800226 19800525
8 -171.00 -82.00 19800226 19800525
8 -170.00 -82.00 19800226 19800525
8 -169.00 -82.00 19800226 19800525
8 -168.00 -82.00 19800226 19800525
8 -145.00 -80.00 19800226 19800525
8 -144.00 -80.00 19800226 19800525
8 -143.00 -80.00 19800226 19800525
8 -142.00 -80.00 19800226 19800525
8 -141.00 -80.00 19800226 19800525
8 -140.00 -80.00 19800226 19800525
8 -139.00 -80.00 19800226 19800525
8 -138.00 -80.00 19800226 19800525
8 -137.00 -80.00 19800226 19800525
8 -136.00 -80.00 19800226 19800525
8 -135.00 -80.00 19800226 19800525
8 -134.00 -80.00 19800226 19800525
8 -133.00 -80.00 19800226 19800525
8 -132.00 -80.00 19800226 19800525
8 -131.00 -80.00 19800226 19800525
8 -130.00 -80.00 19800226 19800525
8 -128.00 -80.00 19800226 19800525
8 -127.00 -80.00 19800226 19800525
8 -133.00 -79.00 19800226 19800525
8 -132.00 -79.00 19800226 19800525
8 -131.00 -79.00 19800226 19800525
8 -130.00 -79.00 19800226 19800525
8 -129.00 -79.00 19800226 19800525
8 -128.00 -79.00 19800226 19800525
8 -127.00 -79.00 19800226 19800525
8 -126.00 -80.00 19800227 19800526
8 -125.00 -80.00 19800227 19800526
8 173.00 -85.00 19800228 19800527
8 -152.00 -84.00 19800228 19800527
8 -151.00 -84.00 19800228 19800527
8 -150.00 -84.00 19800228 19800527
8 -177.00 -83.00 19800228 19800527
8 -140.00 -72.00 19800302 19800530
8 -140.00 -71.00 19800302 19800530
8 -104.00 -81.00 19800303 19800531
8 -103.00 -81.00 19800303 19800531
8 -102.00 -81.00 19800303 19800531
8 -113.00 -80.00 19800303 19800531
8 -112.00 -80.00 19800303 19800531
8 -111.00 -80.00 19800303 19800531
8 -110.00 -80.00 19800303 19800531
8 -109.00 -80.00 19800303 19800531
8 -108.00 -80.00 19800303 19800531
8 -107.00 -80.00 19800303 19800531
8 -120.00 -79.00 19800303 19800531
8 -119.00 -79.00 19800303 19800531
8 -118.00 -79.00 19800303 19800531
8 -117.00 -79.00 19800303 19800531
8 -137.00 -76.00 19800303 19800531
8 -136.00 -76.00 19800303 19800531
8 -135.00 -76.00 19800303 19800531
8 -134.00 -76.00 19800303 19800531
8 -134.00 -75.00 19800303 19800531
8 -133.00 -75.00 19800303 19800531
8 175.00 -85.00 19800304 19800601
8 176.00 -85.00 19800304 19800601
8 -166.00 -78.00 19800305 19800602
8 -165.00 -81.00 19800306 19800603
8 -164.00 -81.00 19800306 19800603
8 -163.00 -81.00 19800306 19800603
8 -162.00 -81.00 19800306 19800603
8 -158.00 -81.00 19800306 19800603
8 -163.00 -80.00 19800306 19800603
8 -161.00 -80.00 19800306 19800603
8 -160.00 -80.00 19800306 19800603
8 -159.00 -80.00 19800306 19800603
8 -158.00 -80.00 19800306 19800603
8 -157.00 -80.00 19800306 19800603
8 -167.00 -79.00 19800306 19800603
8 -166.00 -79.00 19800306 19800603
8 -165.00 -79.00 19800306 19800603
8 -164.00 -79.00 19800306 19800603
8 -163.00 -79.00 19800306 19800603
8 -162.00 -79.00 19800306 19800603
8 -161.00 -79.00 19800306 19800603
8 -160.00 -79.00 19800306 19800603
8 -165.00 -78.00 19800306 19800603
8 -164.00 -78.00 19800306 19800603
8 -163.00 -78.00 19800306 19800603
8 -135.00 -75.00 19800306 19800603
8 -136.00 -84.00 19800312 19800609
8 -135.00 -84.00 19800312 19800609
8 -134.00 -84.00 19800312 19800609
8 -133.00 -84.00 19800312 19800609
8 -132.00 -84.00 19800312 19800609
8 -131.00 -84.00 19800312 19800609
8 -130.00 -84.00 19800312 19800609
8 -129.00 -84.00 19800312 19800609
8 -128.00 -84.00 19800313 19800610
8 -127.00 -84.00 19800313 19800610
8 -126.00 -84.00 19800313 19800610
8 -125.00 -84.00 19800313 19800610
8 -124.00 -84.00 19800313 19800610
8 -123.00 -84.00 19800313 19800610
8 -122.00 -84.00 19800313 19800610
8 -180.00 -83.00 19800313 19800610
8 -179.00 -83.00 19800313 19800610
8 -178.00 -83.00 19800313 19800610
8 -116.00 -83.00 19800313 19800610
8 179.00 -83.00 19800313 19800610
8 -180.00 -84.00 19800314 19800611
8 -179.00 -84.00 19800314 19800611
8 173.00 -84.00 19800314 19800611
8 174.00 -84.00 19800314 19800611
8 175.00 -84.00 19800314 19800611
8 176.00 -84.00 19800314 19800611
8 177.00 -84.00 19800314 19800611
8 178.00 -84.00 19800314 19800611
8 179.00 -84.00 19800314 19800611
8 175.00 -83.00 19800314 19800611
8 176.00 -83.00 19800314 19800611
8 177.00 -83.00 19800314 19800611
8 178.00 -83.00 19800314 19800611
8 -121.00 -84.00 19800315 19800612
8 -120.00 -84.00 19800315 19800612
8 -119.00 -84.00 19800315 19800612
8 -129.00 -80.00 19800315 19800612
8 -126.00 -79.00 19800315 19800612
8 -125.00 -79.00 19800315 19800612
8 -124.00 -79.00 19800315 19800612
8 -123.00 -79.00 19800315 19800612
8 -122.00 -79.00 19800315 19800612
8 -121.00 -79.00 19800315 19800612
8 -143.00 -70.00 19800327 19800624
8 -142.00 -70.00 19800327 19800624
8 -141.00 -70.00 19800327 19800624
8 -140.00 -70.00 19800327 19800624
8 -139.00 -70.00 19800327 19800624
8 -138.00 -70.00 19800327 19800624
8 -137.00 -70.00 19800327 19800624
8 -136.00 -70.00 19800327 19800624
8 -143.00 -69.00 19800327 19800624
8 -142.00 -69.00 19800327 19800624
8 -141.00 -69.00 19800327 19800624
8 -140.00 -69.00 19800327 19800624
8 -139.00 -69.00 19800327 19800624
8 -143.00 -68.00 19800327 19800624
8 -142.00 -68.00 19800327 19800624
8 -145.00 -67.00 19800327 19800624
8 -144.00 -67.00 19800327 19800624
8 -144.00 -72.00 19800328 19800625
8 -143.00 -72.00 19800328 19800625
8 -142.00 -72.00 19800328 19800625
8 -141.00 -72.00 19800328 19800625
8 -139.00 -72.00 19800328 19800625
8 -147.00 -71.00 19800328 19800625
8 -146.00 -71.00 19800328 19800625
8 -145.00 -71.00 19800328 19800625
8 -144.00 -71.00 19800328 19800625
8 -143.00 -71.00 19800328 19800625
8 -142.00 -71.00 19800328 19800625
8 -141.00 -71.00 19800328 19800625
8 -139.00 -71.00 19800328 19800625
8 -138.00 -71.00 19800328 19800625
8 -137.00 -71.00 19800328 19800625
8 -136.00 -71.00 19800328 19800625
8 -135.00 -71.00 19800328 19800625
8 -144.00 -70.00 19800328 19800625
8 -144.00 -68.00 19800328 19800625
8 -135.00 -74.00 19800329 19800626
8 -134.00 -74.00 19800329 19800626
8 -133.00 -74.00 19800329 19800626
8 -132.00 -74.00 19800329 19800626
8 -131.00 -74.00 19800329 19800626
8 -130.00 -74.00 19800329 19800626
8 -138.00 -73.00 19800329 19800626
8 -137.00 -73.00 19800329 19800626
8 -136.00 -73.00 19800329 19800626
8 -135.00 -73.00 19800329 19800626
8 -134.00 -73.00 19800329 19800626
8 -133.00 -73.00 19800329 19800626
8 -132.00 -73.00 19800329 19800626
8 -131.00 -73.00 19800329 19800626
8 -130.00 -73.00 19800329 19800626
8 -129.00 -73.00 19800329 19800626
8 -128.00 -73.00 19800329 19800626
8 -138.00 -72.00 19800329 19800626
8 -137.00 -72.00 19800329 19800626
8 -136.00 -72.00 19800329 19800626
8 -135.00 -72.00 19800329 19800626
8 -134.00 -72.00 19800329 19800626
8 -133.00 -72.00 19800329 19800626
8 -132.00 -72.00 19800329 19800626
8 -146.00 -68.00 19800329 19800626
8 -145.00 -68.00 19800329 19800626
8 -146.00 -67.00 19800329 19800626
8 -146.00 -66.00 19800329 19800626
8 -154.00 -86.00 19800330 19800627
8 -153.00 -86.00 19800330 19800627
8 -152.00 -86.00 19800330 19800627
8 -151.00 -86.00 19800330 19800627
8 -150.00 -86.00 19800330 19800627
8 -149.00 -86.00 19800330 19800627
8 -148.00 -86.00 19800330 19800627
8 -147.00 -86.00 19800330 19800627
8 -146.00 -86.00 19800330 19800627
8 -145.00 -86.00 19800330 19800627
8 -144.00 -86.00 19800330 19800627
8 -143.00 -86.00 19800330 19800627
8 -142.00 -86.00 19800330 19800627
8 -141.00 -86.00 19800330 19800627
8 -140.00 -86.00 19800330 19800627
8 -139.00 -86.00 19800330 19800627
8 -138.00 -86.00 19800330 19800627
8 -137.00 -86.00 19800330 19800627
8 -136.00 -86.00 19800330 19800627
8 -135.00 -86.00 19800330 19800627
8 -180.00 -85.00 19800330 19800627
8 -179.00 -85.00 19800330 19800627
8 -178.00 -85.00 19800330 19800627
8 -177.00 -85.00 19800330 19800627
8 -176.00 -85.00 19800330 19800627
8 -175.00 -85.00 19800330 19800627
8 -174.00 -85.00 19800330 19800627
8 -173.00 -85.00 19800330 19800627
8 -172.00 -85.00 19800330 19800627
8 -171.00 -85.00 19800330 19800627
8 -170.00 -85.00 19800330 19800627
8 -169.00 -85.00 19800330 19800627
8 -168.00 -85.00 19800330 19800627
8 -167.00 -85.00 19800330 19800627
8 -166.00 -85.00 19800330 19800627
8 -165.00 -85.00 19800330 19800627
8 -164.00 -85.00 19800330 19800627
8 -163.00 -85.00 19800330 19800627
8 -162.00 -85.00 19800330 19800627
8 -161.00 -85.00 19800330 19800627
8 -160.00 -85.00 19800330 19800627
8 -159.00 -85.00 19800330 19800627
8 -158.00 -85.00 19800330 19800627
8 -157.00 -85.00 19800330 19800627
8 -156.00 -85.00 19800330 19800627
8 -155.00 -85.00 19800330 19800627
8 -154.00 -85.00 19800330 19800627
8 -153.00 -85.00 19800330 19800627
8 -152.00 -85.00 19800330 19800627
8 -151.00 -85.00 19800330 19800627
8 -150.00 -85.00 19800330 19800627
8 -149.00 -85.00 19800330 19800627
8 -148.00 -85.00 19800330 19800627
8 -147.00 -85.00 19800330 19800627
8 -146.00 -85.00 19800330 19800627
8 -145.00 -85.00 19800330 19800627
8 -144.00 -85.00 19800330 19800627
8 -143.00 -85.00 19800330 19800627
8 -142.00 -85.00 19800330 19800627
8 -141.00 -85.00 19800330 19800627
8 -140.00 -85.00 19800330 19800627
8 -139.00 -85.00 19800330 19800627
8 -138.00 -85.00 19800330 19800627
8 -137.00 -85.00 19800330 19800627
8 -136.00 -85.00 19800330 19800627
8 -135.00 -85.00 19800330 19800627
8 -134.00 -85.00 19800330 19800627
8 -133.00 -85.00 19800330 19800627
8 -132.00 -85.00 19800330 19800627
8 -131.00 -85.00 19800330 19800627
8 -130.00 -85.00 19800330 19800627
8 -129.00 -85.00 19800330 19800627
8 -128.00 -85.00 19800330 19800627
8 -127.00 -85.00 19800330 19800627
8 -126.00 -85.00 19800330 19800627
8 -125.00 -85.00 19800330 19800627
8 -124.00 -85.00 19800330 19800627
8 -123.00 -85.00 19800330 19800627
8 177.00 -85.00 19800330 19800627
8 178.00 -85.00 19800330 19800627
8 179.00 -85.00 19800330 19800627
8 -178.00 -84.00 19800330 19800627
8 -177.00 -84.00 19800330 19800627
8 -176.00 -84.00 19800330 19800627
8 -175.00 -84.00 19800330 19800627
8 -174.00 -84.00 19800330 19800627
8 -173.00 -84.00 19800330 19800627
8 -172.00 -84.00 19800330 19800627
8 -171.00 -84.00 19800330 19800627
8 -170.00 -84.00 19800330 19800627
8 -169.00 -84.00 19800330 19800627
8 -168.00 -84.00 19800330 19800627
8 -167.00 -84.00 19800330 19800627
8 -166.00 -84.00 19800330 19800627
8 -165.00 -84.00 19800330 19800627
8 -164.00 -84.00 19800330 19800627
8 -163.00 -84.00 19800330 19800627
8 -162.00 -84.00 19800330 19800627
8 -161.00 -84.00 19800330 19800627
8 -160.00 -84.00 19800330 19800627
8 -159.00 -84.00 19800330 19800627
8 -158.00 -84.00 19800330 19800627
8 -157.00 -84.00 19800330 19800627
8 -156.00 -84.00 19800330 19800627
8 -155.00 -84.00 19800330 19800627
8 -154.00 -84.00 19800330 19800627
8 -153.00 -84.00 19800330 19800627
8 -149.00 -84.00 19800330 19800627
8 -148.00 -84.00 19800330 19800627
8 -147.00 -84.00 19800330 19800627
8 -146.00 -84.00 19800330 19800627
8 -145.00 -84.00 19800330 19800627
8 -144.00 -84.00 19800330 19800627
8 -143.00 -84.00 19800330 19800627
8 -142.00 -84.00 19800330 19800627
8 -141.00 -84.00 19800330 19800627
8 -140.00 -84.00 19800330 19800627
8 -139.00 -84.00 19800330 19800627
8 -138.00 -84.00 19800330 19800627
8 -137.00 -84.00 19800330 19800627
8 -138.00 -69.00 19800330 19800627
8 -137.00 -69.00 19800330 19800627
8 -136.00 -69.00 19800330 19800627
8 -141.00 -68.00 19800330 19800627
8 -140.00 -68.00 19800330 19800627
8 -143.00 -67.00 19800330 19800627
8 -142.00 -67.00 19800330 19800627
8 -145.00 -66.00 19800330 19800627
8 -144.00 -66.00 19800330 19800627
8 -143.00 -66.00 19800330 19800627
8 -131.00 -72.00 19800331 19800628
8 -130.00 -72.00 19800331 19800628
8 -129.00 -72.00 19800331 19800628
8 -134.00 -71.00 19800331 19800628
8 -133.00 -71.00 19800331 19800628
8 -132.00 -71.00 19800331 19800628
8 -135.00 -70.00 19800331 19800628
8 -134.00 -70.00 19800331 19800628
8 -133.00 -70.00 19800331 19800628
8 -132.00 -70.00 19800331 19800628
8 -148.00 -66.00 19800426 19800724
8 -147.00 -66.00 19800426 19800724
8 -127.00 -72.00 19800517 19800814
8 -126.00 -72.00 19800517 19800814
8 -125.00 -72.00 19800517 19800814
8 -124.00 -72.00 19800517 19800814
8 -123.00 -72.00 19800517 19800814
8 -122.00 -72.00 19800517 19800814
8 -122.00 -75.00 19800518 19800815
8 -121.00 -75.00 19800518 19800815
8 -120.00 -75.00 19800518 19800815
8 -119.00 -75.00 19800518 19800815
8 -118.00 -75.00 19800518 19800815
8 -122.00 -74.00 19800518 19800815
8 -121.00 -74.00 19800518 19800815
8 -120.00 -74.00 19800518 19800815
8 -119.00 -74.00 19800518 19800815
8 -118.00 -74.00 19800518 19800815
8 -122.00 -73.00 19800518 19800815
8 -121.00 -73.00 19800518 19800815
8 -120.00 -73.00 19800518 19800815
8 -119.00 -73.00 19800518 19800815
8 -118.00 -73.00 19800518 19800815
8 -122.00 -85.00 19800519 19800816
8 -121.00 -85.00 19800519 19800816
8 -120.00 -85.00 19800519 19800816
8 -119.00 -85.00 19800519 19800816
8 -118.00 -85.00 19800519 19800816
8 -117.00 -85.00 19800519 19800816
8 -116.00 -85.00 19800519 19800816
8 -115.00 -85.00 19800519 19800816
8 -114.00 -85.00 19800519 19800816
8 -113.00 -85.00 19800519 19800816
8 -112.00 -85.00 19800519 19800816
8 -111.00 -85.00 19800519 19800816
8 -110.00 -85.00 19800519 19800816
8 -117.00 -84.00 19800519 19800816
8 -116.00 -84.00 19800519 19800816
8 -115.00 -84.00 19800519 19800816
8 -114.00 -84.00 19800519 19800816
8 -113.00 -84.00 19800519 19800816
8 -112.00 -84.00 19800519 19800816
8 -111.00 -84.00 19800519 19800816
8 -110.00 -84.00 19800519 19800816
8 -109.00 -84.00 19800519 19800816
8 -108.00 -84.00 19800519 19800816
8 -107.00 -84.00 19800519 19800816
8 -106.00 -84.00 19800519 19800816
8 -105.00 -84.00 19800519 19800816
8 -104.00 -84.00 19800519 19800816
8 -103.00 -84.00 19800519 19800816
8 -102.00 -84.00 19800519 19800816
8 -131.00 -76.00 19800519 19800816
8 -130.00 -76.00 19800519 19800816
8 -129.00 -76.00 19800519 19800816
8 -128.00 -76.00 19800519 19800816
8 -127.00 -76.00 19800519 19800816
8 -126.00 -76.00 19800519 19800816
8 -125.00 -76.00 19800519 19800816
8 -124.00 -76.00 19800519 19800816
8 -123.00 -76.00 19800519 19800816
8 -130.00 -75.00 19800519 19800816
8 -129.00 -75.00 19800519 19800816
8 -128.00 -75.00 19800519 19800816
8 -127.00 -75.00 19800519 19800816
8 -126.00 -75.00 19800519 19800816
8 -125.00 -75.00 19800519 19800816
8 -124.00 -75.00 19800519 19800816
8 -123.00 -75.00 19800519 19800816
8 -129.00 -74.00 19800519 19800816
8 -128.00 -74.00 19800519 19800816
8 -127.00 -74.00 19800519 19800816
8 -126.00 -74.00 19800519 19800816
8 -125.00 -74.00 19800519 19800816
8 -124.00 -74.00 19800519 19800816
8 -123.00 -74.00 19800519 19800816
8 -127.00 -73.00 19800519 19800816
8 -126.00 -73.00 19800519 19800816
8 -125.00 -73.00 19800519 19800816
8 -124.00 -73.00 19800519 19800816
8 -123.00 -73.00 19800519 19800816
8 -118.00 -84.00 19800520 19800817
8 -133.00 -76.00 19800523 19800820
8 -132.00 -76.00 19800523 19800820
8 -132.00 -75.00 19800523 19800820
8 -131.00 -75.00 19800523 19800820

Patch 9 of 3734, Core period: 19840407-19840706
9 174.00 -85.00 19840224 19840523
9 175.00 -85.00 19840224 19840523
9 176.00 -85.00 19840224 19840523
9 177.00 -85.00 19840224 19840523
9 175.00 -84.00 19840224 19840523
9 176.00 -84.00 19840225 19840524
9 177.00 -84.00 19840225 19840524
9 -178.00 -83.00 19840225 19840524
9 169.00 -81.00 19840402 19840630
9 170.00 -81.00 19840402 19840630
9 171.00 -81.00 19840402 19840630
9 172.00 -81.00 19840402 19840630
9 173.00 -81.00 19840402 19840630
9 174.00 -81.00 19840402 19840630
9 168.00 -81.00 19840403 19840701
9 -180.00 -83.00 19840406 19840704
9 -179.00 -83.00 19840406 19840704
9 174.00 -83.00 19840406 19840704
9 175.00 -83.00 19840406 19840704
9 176.00 -83.00 19840406 19840704
9 177.00 -83.00 19840406 19840704
9 178.00 -83.00 19840406 19840704
9 179.00 -83.00 19840406 19840704
9 171.00 -82.00 19840406 19840704
9 172.00 -82.00 19840406 19840704
9 173.00 -82.00 19840406 19840704
9 174.00 -82.00 19840406 19840704
9 175.00 -82.00 19840406 19840704
9 176.00 -82.00 19840406 19840704
9 177.00 -82.00 19840406 19840704
9 178.00 -82.00 19840406 19840704
9 179.00 -82.00 19840406 19840704
9 169.00 -84.00 19840407 19840705
9 170.00 -84.00 19840407 19840705
9 171.00 -84.00 19840407 19840705
9 172.00 -84.00 19840407 19840705
9 173.00 -84.00 19840407 19840705
9 174.00 -84.00 19840407 19840705
9 163.00 -83.00 19840407 19840705
9 164.00 -83.00 19840407 19840705
9 165.00 -83.00 19840407 19840705
9 166.00 -83.00 19840407 19840705
9 167.00 -83.00 19840407 19840705
9 168.00 -83.00 19840407 19840705
9 169.00 -83.00 19840407 19840705
9 170.00 -83.00 19840407 19840705
9 171.00 -83.00 19840407 19840705
9 172.00 -83.00 19840407 19840705
9 173.00 -83.00 19840407 19840705
9 159.00 -82.00 19840407 19840705
9 160.00 -82.00 19840407 19840705
9 161.00 -82.00 19840407 19840705
9 162.00 -82.00 19840407 19840705
9 163.00 -82.00 19840407 19840705
9 164.00 -82.00 19840407 19840705
9 165.00 -82.00 19840407 19840705
9 166.00 -82.00 19840407 19840705
9 167.00 -82.00 19840407 19840705
9 168.00 -82.00 19840407 19840705
9 169.00 -82.00 19840407 19840705
9 170.00 -82.00 19840407 19840705
9 160.00 -81.00 19840407 19840705
9 161.00 -81.00 19840407 19840705
9 162.00 -81.00 19840407 19840705
9 163.00 -81.00 19840407 19840705
9 164.00 -81.00 19840407 19840705
9 165.00 -81.00 19840407 19840705
9 166.00 -81.00 19840407 19840705
9 167.00 -81.00 19840407 19840705
9 161.00 -80.00 19840407 19840705

Patch 10 of 3734, Core period: 20020818-20021117
10 -180.00 -81.00 20020817 20021114
10 -179.00 -81.00 20020817 20021114
10 -178.00 -81.00 20020817 20021114
10 -177.00 -81.00 20020817 20021114
10 -176.00 -81.00 20020817 20021114
10 -175.00 -81.00 20020817 20021114
10 -174.00 -81.00 20020817 20021114
10 -173.00 -81.00 20020817 20021114
10 -172.00 -81.00 20020817 20021114
10 177.00 -81.00 20020817 20021114
10 178.00 -81.00 20020817 20021114
10 179.00 -81.00 20020817 20021114
10 -180.00 -80.00 20020817 20021114
10 -179.00 -80.00 20020817 20021114
10 -178.00 -80.00 20020817 20021114
10 -177.00 -80.00 20020817 20021114
10 -176.00 -80.00 20020817 20021114
10 -175.00 -80.00 20020817 20021114
10 179.00 -80.00 20020817 20021114
10 -174.00 -82.00 20020818 20021115
10 -173.00 -82.00 20020818 20021115
10 -171.00 -81.00 20020818 20021115
10 -170.00 -81.00 20020818 20021115
10 -169.00 -81.00 20020818 20021115
10 -168.00 -81.00 20020818 20021115
10 -167.00 -81.00 20020818 20021115
10 -174.00 -80.00 20020818 20021115
10 -173.00 -80.00 20020818 20021115
10 -172.00 -80.00 20020818 20021115
10 -171.00 -80.00 20020818 20021115
10 -170.00 -80.00 20020818 20021115
10 -169.00 -80.00 20020818 20021115
10 -168.00 -80.00 20020818 20021115
10 -163.00 -80.00 20020818 20021115
10 -173.00 -79.00 20020818 20021115
10 -172.00 -79.00 20020818 20021115
10 -170.00 -82.00 20020819 20021116
10 -169.00 -82.00 20020819 20021116
10 -168.00 -82.00 20020819 20021116
10 -167.00 -82.00 20020819 20021116
10 -166.00 -82.00 20020819 20021116
10 -165.00 -82.00 20020819 20021116
10 -164.00 -82.00 20020819 20021116
10 -163.00 -82.00 20020819 20021116
10 -162.00 -82.00 20020819 20021116
10 -161.00 -82.00 20020819 20021116
10 -160.00 -82.00 20020819 20021116
10 -159.00 -82.00 20020819 20021116
10 -166.00 -81.00 20020819 20021116
10 -165.00 -81.00 20020819 20021116
10 -164.00 -81.00 20020819 20021116
10 -163.00 -81.00 20020819 20021116
10 -162.00 -81.00 20020819 20021116
10 -161.00 -81.00 20020819 20021116
10 -160.00 -81.00 20020819 20021116

Patch 11 of 3734, Core period: 19840730-19841104
11 -180.00 -81.00 19840729 19841026
11 -179.00 -81.00 19840729 19841026
11 179.00 -81.00 19840729 19841026
11 175.00 -81.00 19840730 19841027
11 176.00 -81.00 19840730 19841027
11 177.00 -81.00 19840730 19841027
11 172.00 -81.00 19840806 19841103
11 173.00 -81.00 19840806 19841103
11 174.00 -81.00 19840806 19841103
11 171.00 -81.00 19840808 19841105
11 178.00 -81.00 19841004 19850101

Patch 12 of 3734, Core period: 19860310-19860727
12 172.00 -78.00 19860308 19860605
12 173.00 -78.00 19860308 19860605
12 174.00 -78.00 19860308 19860605
12 175.00 -78.00 19860308 19860605
12 176.00 -78.00 19860308 19860605
12 177.00 -78.00 19860308 19860605
12 172.00 -77.00 19860308 19860605
12 173.00 -77.00 19860308 19860605
12 -180.00 -80.00 19860309 19860606
12 169.00 -80.00 19860309 19860606
12 170.00 -80.00 19860309 19860606
12 171.00 -80.00 19860309 19860606
12 172.00 -80.00 19860309 19860606
12 173.00 -80.00 19860309 19860606
12 174.00 -80.00 19860309 19860606
12 175.00 -80.00 19860309 19860606
12 176.00 -80.00 19860309 19860606
12 177.00 -80.00 19860309 19860606
12 178.00 -80.00 19860309 19860606
12 179.00 -80.00 19860309 19860606
12 170.00 -79.00 19860309 19860606
12 171.00 -79.00 19860309 19860606
12 172.00 -79.00 19860309 19860606
12 173.00 -79.00 19860309 19860606
12 174.00 -79.00 19860309 19860606
12 168.00 -78.00 19860309 19860606
12 169.00 -78.00 19860309 19860606
12 170.00 -78.00 19860309 19860606
12 171.00 -78.00 19860309 19860606
12 -180.00 -79.00 19860310 19860607
12 -179.00 -79.00 19860310 19860607
12 168.00 -79.00 19860310 19860607
12 169.00 -79.00 19860310 19860607
12 175.00 -79.00 19860310 19860607
12 176.00 -79.00 19860310 19860607
12 177.00 -79.00 19860310 19860607
12 178.00 -79.00 19860310 19860607
12 179.00 -79.00 19860310 19860607
12 -180.00 -78.00 19860310 19860607
12 -179.00 -78.00 19860310 19860607
12 178.00 -78.00 19860310 19860607
12 179.00 -78.00 19860310 19860607
12 -179.00 -80.00 19860311 19860608
12 -178.00 -79.00 19860315 19860612
12 176.00 -81.00 19860317 19860614
12 177.00 -81.00 19860317 19860614
12 178.00 -81.00 19860317 19860614
12 -178.00 -78.00 19860317 19860614
12 174.00 -77.00 19860414 19860712
12 175.00 -77.00 19860414 19860712
12 176.00 -77.00 19860428 19860726
12 177.00 -77.00 19860428 19860726
12 178.00 -77.00 19860428 19860726
12 173.00 -76.00 19860428 19860726
12 174.00 -76.00 19860428 19860726
12 175.00 -76.00 19860428 19860726
12 -180.00 -77.00 19860429 19860727
12 -179.00 -77.00 19860429 19860727
12 -178.00 -77.00 19860429 19860727
12 179.00 -77.00 19860429 19860727
12 -180.00 -76.00 19860429 19860727
12 176.00 -76.00 19860429 19860727
12 177.00 -76.00 19860429 19860727
12 178.00 -76.00 19860429 19860727
12 179.00 -76.00 19860429 19860727
12 173.00 -75.00 19860429 19860727
12 174.00 -75.00 19860429 19860727
12 175.00 -75.00 19860429 19860727
12 177.00 -75.00 19860429 19860727

Patch 13 of 3734, Core period: 20110205-20110521
13 161.00 -77.00 20101125 20110222
13 162.00 -77.00 20101125 20110222
13 163.00 -77.00 20101221 20110320
13 164.00 -76.00 20110115 20110414
13 165.00 -76.00 20110115 20110414
13 166.00 -76.00 20110115 20110414
13 167.00 -76.00 20110115 20110414
13 -180.00 -76.00 20110203 20110503
13 -174.00 -76.00 20110203 20110503
13 -173.00 -76.00 20110203 20110503
13 -171.00 -76.00 20110203 20110503
13 -172.00 -76.00 20110204 20110504
13 -177.00 -75.00 20110204 20110504
13 -176.00 -75.00 20110204 20110504
13 -175.00 -75.00 20110204 20110504
13 -174.00 -75.00 20110204 20110504
13 -173.00 -75.00 20110204 20110504
13 -172.00 -75.00 20110204 20110504
13 -175.00 -73.00 20110204 20110504
13 -174.00 -73.00 20110204 20110504
13 -173.00 -73.00 20110204 20110504
13 -171.00 -75.00 20110205 20110505
13 -170.00 -75.00 20110205 20110505
13 -173.00 -74.00 20110205 20110505
13 -172.00 -74.00 20110205 20110505
13 -171.00 -74.00 20110205 20110505
13 -170.00 -74.00 20110205 20110505
13 -169.00 -74.00 20110205 20110505
13 -168.00 -74.00 20110205 20110505
13 -167.00 -74.00 20110205 20110505
13 -172.00 -73.00 20110205 20110505
13 166.00 -77.00 20110217 20110517
13 167.00 -77.00 20110218 20110518
13 -177.00 -73.00 20110218 20110518
13 -176.00 -73.00 20110218 20110518
13 -180.00 -77.00 20110219 20110519
13 -179.00 -77.00 20110219 20110519
13 -178.00 -77.00 20110219 20110519
13 -177.00 -77.00 20110219 20110519
13 -176.00 -77.00 20110219 20110519
13 -175.00 -77.00 20110219 20110519
13 179.00 -77.00 20110219 20110519
13 179.00 -76.00 20110219 20110519
13 -169.00 -75.00 20110219 20110519
13 -168.00 -75.00 20110219 20110519
13 -167.00 -75.00 20110219 20110519
13 -166.00 -74.00 20110219 20110519
13 -165.00 -74.00 20110219 20110519
13 170.00 -77.00 20110220 20110520
13 171.00 -77.00 20110220 20110520
13 172.00 -77.00 20110220 20110520
13 173.00 -77.00 20110220 20110520
13 176.00 -77.00 20110220 20110520
13 177.00 -77.00 20110220 20110520
13 178.00 -77.00 20110220 20110520
13 -179.00 -76.00 20110220 20110520
13 -178.00 -76.00 20110220 20110520
13 -177.00 -76.00 20110220 20110520
13 -176.00 -76.00 20110220 20110520
13 -175.00 -76.00 20110220 20110520
13 168.00 -76.00 20110220 20110520
13 169.00 -76.00 20110220 20110520
13 170.00 -76.00 20110220 20110520
13 171.00 -76.00 20110220 20110520
13 172.00 -76.00 20110220 20110520
13 173.00 -76.00 20110220 20110520
13 174.00 -76.00 20110220 20110520
13 175.00 -76.00 20110220 20110520
13 176.00 -76.00 20110220 20110520
13 177.00 -76.00 20110220 20110520
13 178.00 -76.00 20110220 20110520
13 -163.00 -75.00 20110313 20110610
13 -164.00 -74.00 20110313 20110610
13 -163.00 -74.00 20110313 20110610

Patch 14 of 3734, Core period: 19911221-19920321
14 166.00 -76.00 19911219 19920317
14 167.00 -76.00 19911219 19920317
14 168.00 -76.00 19911219 19920317
14 164.00 -75.00 19911219 19920317
14 165.00 -75.00 19911219 19920317
14 166.00 -75.00 19911219 19920317
14 167.00 -75.00 19911219 19920317
14 168.00 -75.00 19911219 19920317
14 163.00 -74.00 19911219 19920317
14 164.00 -74.00 19911219 19920317
14 165.00 -74.00 19911219 19920317
14 166.00 -74.00 19911219 19920317
14 167.00 -74.00 19911219 19920317
14 168.00 -74.00 19911219 19920317
14 169.00 -74.00 19911219 19920317
14 165.00 -73.00 19911219 19920317
14 166.00 -73.00 19911219 19920317
14 167.00 -73.00 19911219 19920317
14 168.00 -73.00 19911219 19920317
14 169.00 -73.00 19911219 19920317
14 -178.00 -75.00 19911220 19920318
14 169.00 -75.00 19911220 19920318
14 170.00 -75.00 19911220 19920318
14 171.00 -75.00 19911220 19920318
14 172.00 -75.00 19911220 19920318
14 173.00 -75.00 19911220 19920318
14 174.00 -75.00 19911220 19920318
14 175.00 -75.00 19911220 19920318
14 176.00 -75.00 19911220 19920318
14 177.00 -75.00 19911220 19920318
14 170.00 -74.00 19911220 19920318
14 171.00 -74.00 19911220 19920318
14 172.00 -74.00 19911220 19920318
14 173.00 -74.00 19911220 19920318
14 174.00 -74.00 19911220 19920318
14 175.00 -74.00 19911220 19920318
14 176.00 -74.00 19911220 19920318
14 177.00 -74.00 19911220 19920318
14 170.00 -73.00 19911220 19920318
14 171.00 -73.00 19911220 19920318
14 172.00 -73.00 19911220 19920318
14 173.00 -73.00 19911220 19920318
14 174.00 -73.00 19911220 19920318
14 175.00 -73.00 19911220 19920318
14 176.00 -73.00 19911220 19920318
14 177.00 -73.00 19911220 19920318
14 178.00 -73.00 19911220 19920318
14 175.00 -72.00 19911220 19920318
14 176.00 -72.00 19911220 19920318
14 177.00 -72.00 19911220 19920318
14 -180.00 -76.00 19911221 19920319
14 169.00 -76.00 19911221 19920319
14 170.00 -76.00 19911221 19920319
14 171.00 -76.00 19911221 19920319
14 172.00 -76.00 19911221 19920319
14 173.00 -76.00 19911221 19920319
14 174.00 -76.00 19911221 19920319
14 -180.00 -75.00 19911221 19920319
14 -179.00 -75.00 19911221 19920319
14 178.00 -75.00 19911221 19920319
14 179.00 -75.00 19911221 19920319
14 164.00 -76.00 19911222 19920320
14 165.00 -76.00 19911222 19920320
14 -180.00 -74.00 19911223 19920321
14 -179.00 -74.00 19911223 19920321
14 178.00 -74.00 19911223 19920321
14 179.00 -74.00 19911223 19920321
14 -180.00 -73.00 19911223 19920321
14 179.00 -73.00 19911223 19920321
14 165.00 -77.00 19920121 19920419
14 166.00 -77.00 19920121 19920419
14 171.00 -72.00 19920121 19920419
14 172.00 -72.00 19920121 19920419
14 173.00 -72.00 19920121 19920419
14 174.00 -72.00 19920121 19920419
14 172.00 -71.00 19920121 19920419
14 172.00 -70.00 19920121 19920419
14 173.00 -70.00 19920121 19920419
14 174.00 -70.00 19920121 19920419
14 173.00 -71.00 19920122 19920420
14 174.00 -71.00 19920122 19920420
14 175.00 -71.00 19920122 19920420
14 176.00 -71.00 19920122 19920420

Patch 15 of 3734, Core period: 19790208-19790511
15 -176.00 -76.00 19790101 19790331
15 -175.00 -76.00 19790101 19790331
15 -176.00 -75.00 19790205 19790505
15 -175.00 -75.00 19790205 19790505
15 -174.00 -75.00 19790205 19790505
15 175.00 -75.00 19790207 19790507
15 176.00 -75.00 19790207 19790507
15 177.00 -75.00 19790207 19790507
15 178.00 -75.00 19790207 19790507
15 179.00 -75.00 19790207 19790507
15 177.00 -74.00 19790207 19790507
15 178.00 -74.00 19790207 19790507
15 179.00 -74.00 19790207 19790507
15 176.00 -74.00 19790208 19790508
15 178.00 -73.00 19790208 19790508
15 179.00 -73.00 19790208 19790508
15 -180.00 -75.00 19790210 19790510
15 -179.00 -75.00 19790210 19790510
15 -178.00 -75.00 19790210 19790510
15 -177.00 -75.00 19790210 19790510
15 -180.00 -74.00 19790210 19790510
15 -179.00 -74.00 19790210 19790510
15 -178.00 -74.00 19790213 19790513
15 -177.00 -74.00 19790213 19790513
15 -176.00 -74.00 19790213 19790513
15 -180.00 -73.00 19790213 19790513
15 -179.00 -73.00 19790213 19790513
15 -178.00 -73.00 19790213 19790513
15 -177.00 -73.00 19790213 19790513

Patch 16 of 3734, Core period: 19910214-19910527
16 -171.00 -70.00 19910104 19910403
16 -170.00 -70.00 19910104 19910403
16 -169.00 -70.00 19910104 19910403
16 -168.00 -70.00 19910104 19910403
16 159.00 -73.00 19910204 19910504
16 160.00 -73.00 19910204 19910504
16 161.00 -73.00 19910204 19910504
16 157.00 -72.00 19910207 19910507
16 158.00 -72.00 19910207 19910507
16 160.00 -72.00 19910207 19910507
16 163.00 -72.00 19910207 19910507
16 164.00 -72.00 19910207 19910507
16 165.00 -72.00 19910207 19910507
16 158.00 -71.00 19910207 19910507
16 159.00 -71.00 19910208 19910508
16 160.00 -71.00 19910208 19910508
16 161.00 -71.00 19910208 19910508
16 162.00 -71.00 19910208 19910508
16 162.00 -70.00 19910208 19910508
16 166.00 -70.00 19910208 19910508
16 161.00 -70.00 19910209 19910509
16 159.00 -69.00 19910209 19910509
16 160.00 -69.00 19910209 19910509
16 161.00 -69.00 19910209 19910509
16 162.00 -69.00 19910209 19910509
16 163.00 -69.00 19910209 19910509
16 164.00 -69.00 19910209 19910509
16 165.00 -69.00 19910209 19910509
16 166.00 -69.00 19910209 19910509
16 167.00 -69.00 19910209 19910509
16 159.00 -68.00 19910209 19910509
16 160.00 -68.00 19910209 19910509
16 161.00 -68.00 19910209 19910509
16 162.00 -68.00 19910209 19910509
16 152.00 -71.00 19910210 19910510
16 153.00 -71.00 19910210 19910510
16 154.00 -71.00 19910210 19910510
16 155.00 -71.00 19910210 19910510
16 157.00 -71.00 19910210 19910510
16 163.00 -71.00 19910210 19910510
16 157.00 -70.00 19910210 19910510
16 158.00 -70.00 19910210 19910510
16 159.00 -70.00 19910210 19910510
16 160.00 -70.00 19910210 19910510
16 163.00 -70.00 19910210 19910510
16 164.00 -70.00 19910210 19910510
16 165.00 -70.00 19910210 19910510
16 -161.00 -69.00 19910210 19910510
16 -160.00 -69.00 19910210 19910510
16 -159.00 -69.00 19910210 19910510
16 -158.00 -69.00 19910210 19910510
16 151.00 -70.00 19910211 19910511
16 152.00 -70.00 19910211 19910511
16 153.00 -70.00 19910211 19910511
16 154.00 -70.00 19910211 19910511
16 155.00 -70.00 19910211 19910511
16 156.00 -70.00 19910211 19910511
16 152.00 -69.00 19910211 19910511
16 153.00 -69.00 19910211 19910511
16 154.00 -69.00 19910213 19910513
16 155.00 -69.00 19910213 19910513
16 156.00 -69.00 19910213 19910513
16 157.00 -69.00 19910213 19910513
16 158.00 -69.00 19910213 19910513
16 154.00 -68.00 19910213 19910513
16 155.00 -68.00 19910213 19910513
16 156.00 -68.00 19910213 19910513
16 157.00 -68.00 19910213 19910513
16 158.00 -68.00 19910213 19910513
16 157.00 -67.00 19910213 19910513
16 -159.00 -73.00 19910214 19910514
16 -159.00 -72.00 19910214 19910514
16 -158.00 -72.00 19910214 19910514
16 -159.00 -71.00 19910214 19910514
16 -158.00 -71.00 19910214 19910514
16 -157.00 -71.00 19910214 19910514
16 -160.00 -70.00 19910214 19910514
16 -159.00 -70.00 19910214 19910514
16 -158.00 -70.00 19910214 19910514
16 163.00 -68.00 19910214 19910514
16 164.00 -68.00 19910214 19910514
16 -160.00 -72.00 19910216 19910516
16 -160.00 -71.00 19910216 19910516
16 164.00 -71.00 19910216 19910516
16 -173.00 -70.00 19910216 19910516
16 -172.00 -70.00 19910216 19910516
16 166.00 -72.00 19910217 19910517
16 165.00 -71.00 19910217 19910517
16 166.00 -71.00 19910217 19910517
16 -173.00 -69.00 19910217 19910517
16 167.00 -70.00 19910218 19910518
16 168.00 -70.00 19910218 19910518
16 169.00 -70.00 19910218 19910518
16 168.00 -69.00 19910218 19910518
16 169.00 -69.00 19910218 19910518
16 -172.00 -69.00 19910219 19910519
16 -171.00 -69.00 19910219 19910519
16 -170.00 -69.00 19910219 19910519
16 167.00 -72.00 19910220 19910520
16 167.00 -71.00 19910220 19910520
16 168.00 -71.00 19910220 19910520
16 170.00 -70.00 19910220 19910520
16 170.00 -69.00 19910220 19910520
16 -160.00 -73.00 19910221 19910521
16 -162.00 -72.00 19910221 19910521
16 -161.00 -72.00 19910221 19910521
16 159.00 -72.00 19910221 19910521
16 161.00 -72.00 19910221 19910521
16 162.00 -72.00 19910221 19910521
16 168.00 -72.00 19910221 19910521
16 -161.00 -71.00 19910221 19910521
16 169.00 -71.00 19910221 19910521
16 170.00 -71.00 19910221 19910521
16 171.00 -71.00 19910221 19910521
16 172.00 -71.00 19910221 19910521
16 173.00 -71.00 19910221 19910521
16 171.00 -70.00 19910221 19910521
16 172.00 -70.00 19910221 19910521
16 -167.00 -72.00 19910222 19910522
16 -166.00 -72.00 19910222 19910522
16 -165.00 -72.00 19910222 19910522
16 -164.00 -72.00 19910222 19910522
16 -163.00 -72.00 19910222 19910522
16 -170.00 -71.00 19910222 19910522
16 -169.00 -71.00 19910222 19910522
16 -168.00 -71.00 19910222 19910522
16 -167.00 -71.00 19910222 19910522
16 -166.00 -71.00 19910222 19910522
16 -165.00 -71.00 19910222 19910522
16 -164.00 -71.00 19910222 19910522
16 -163.00 -71.00 19910222 19910522
16 -162.00 -71.00 19910222 19910522
16 -167.00 -70.00 19910222 19910522
16 -166.00 -70.00 19910222 19910522
16 -165.00 -70.00 19910222 19910522
16 -164.00 -70.00 19910222 19910522
16 -163.00 -70.00 19910222 19910522
16 -168.00 -69.00 19910222 19910522
16 -167.00 -69.00 19910222 19910522
16 -176.00 -74.00 19910223 19910523
16 -175.00 -74.00 19910223 19910523
16 -174.00 -74.00 19910223 19910523
16 -173.00 -74.00 19910223 19910523
16 -172.00 -74.00 19910223 19910523
16 -171.00 -74.00 19910223 19910523
16 -170.00 -74.00 19910223 19910523
16 -169.00 -74.00 19910223 19910523
16 -168.00 -74.00 19910223 19910523
16 -167.00 -74.00 19910223 19910523
16 -166.00 -74.00 19910223 19910523
16 -165.00 -74.00 19910223 19910523
16 -164.00 -74.00 19910223 19910523
16 -163.00 -74.00 19910223 19910523
16 -176.00 -73.00 19910223 19910523
16 -175.00 -73.00 19910223 19910523
16 -174.00 -73.00 19910223 19910523
16 -173.00 -73.00 19910223 19910523
16 -172.00 -73.00 19910223 19910523
16 -171.00 -73.00 19910223 19910523
16 -170.00 -73.00 19910223 19910523
16 -169.00 -73.00 19910223 19910523
16 -168.00 -73.00 19910223 19910523
16 -167.00 -73.00 19910223 19910523
16 -166.00 -73.00 19910223 19910523
16 -165.00 -73.00 19910223 19910523
16 -164.00 -73.00 19910223 19910523
16 -163.00 -73.00 19910223 19910523
16 -162.00 -73.00 19910223 19910523
16 -161.00 -73.00 19910223 19910523
16 -175.00 -72.00 19910223 19910523
16 -174.00 -72.00 19910223 19910523
16 -173.00 -72.00 19910223 19910523
16 -172.00 -72.00 19910223 19910523
16 -171.00 -72.00 19910223 19910523
16 -170.00 -72.00 19910223 19910523
16 -169.00 -72.00 19910223 19910523
16 -168.00 -72.00 19910223 19910523
16 -162.00 -70.00 19910223 19910523
16 -161.00 -70.00 19910223 19910523
16 -176.00 -75.00 19910224 19910524
16 -175.00 -75.00 19910224 19910524
16 -174.00 -75.00 19910224 19910524
16 158.00 -67.00 19910226 19910526
16 159.00 -67.00 19910226 19910526
16 160.00 -67.00 19910226 19910526
16 161.00 -67.00 19910226 19910526
16 156.00 -71.00 19910305 19910602
16 177.00 -72.00 19910306 19910603
16 178.00 -72.00 19910306 19910603
16 179.00 -72.00 19910306 19910603
16 174.00 -71.00 19910306 19910603
16 175.00 -71.00 19910306 19910603
16 176.00 -71.00 19910306 19910603
16 177.00 -71.00 19910306 19910603
16 178.00 -71.00 19910306 19910603
16 173.00 -70.00 19910306 19910603
16 174.00 -70.00 19910306 19910603
16 175.00 -70.00 19910306 19910603
16 176.00 -70.00 19910306 19910603
16 171.00 -69.00 19910306 19910603
16 172.00 -69.00 19910306 19910603
16 173.00 -69.00 19910306 19910603
16 174.00 -69.00 19910306 19910603
16 -178.00 -73.00 19910307 19910604
16 -177.00 -73.00 19910307 19910604
16 -180.00 -72.00 19910307 19910604
16 -176.00 -69.00 19910307 19910604
16 -175.00 -69.00 19910307 19910604
16 -174.00 -69.00 19910307 19910604
16 -166.00 -69.00 19910307 19910604
16 -165.00 -69.00 19910307 19910604
16 -164.00 -69.00 19910307 19910604
16 -163.00 -69.00 19910307 19910604
16 -162.00 -69.00 19910307 19910604
16 -176.00 -68.00 19910307 19910604
16 -175.00 -68.00 19910307 19910604
16 -177.00 -75.00 19910317 19910614
16 164.00 -73.00 19910318 19910615
16 175.00 -72.00 19910318 19910615
16 176.00 -72.00 19910318 19910615
16 -180.00 -74.00 19910319 19910616
16 -179.00 -74.00 19910319 19910616
16 -178.00 -74.00 19910319 19910616
16 -177.00 -74.00 19910319 19910616
16 176.00 -74.00 19910319 19910616
16 177.00 -74.00 19910319 19910616
16 178.00 -74.00 19910319 19910616
16 179.00 -74.00 19910319 19910616
16 -180.00 -73.00 19910319 19910616
16 -179.00 -73.00 19910319 19910616
16 176.00 -73.00 19910319 19910616
16 177.00 -73.00 19910319 19910616
16 178.00 -73.00 19910319 19910616
16 179.00 -73.00 19910319 19910616
16 155.00 -73.00 19910326 19910623
16 156.00 -73.00 19910326 19910623
16 157.00 -73.00 19910326 19910623
16 158.00 -73.00 19910326 19910623
16 162.00 -73.00 19910326 19910623
16 163.00 -73.00 19910326 19910623
16 152.00 -72.00 19910326 19910623
16 153.00 -72.00 19910326 19910623
16 154.00 -72.00 19910326 19910623
16 155.00 -72.00 19910326 19910623
16 156.00 -72.00 19910326 19910623

Patch 17 of 3734, Core period: 19860307-19860723
17 139.00 -54.00 19860111 19860410
17 148.00 -67.00 19860121 19860420
17 149.00 -67.00 19860121 19860420
17 132.00 -54.00 19860121 19860420
17 133.00 -54.00 19860121 19860420
17 146.00 -67.00 19860122 19860421
17 147.00 -67.00 19860122 19860421
17 150.00 -67.00 19860122 19860421
17 145.00 -66.00 19860124 19860423
17 146.00 -66.00 19860124 19860423
17 147.00 -66.00 19860124 19860423
17 148.00 -66.00 19860124 19860423
17 149.00 -66.00 19860124 19860423
17 150.00 -66.00 19860124 19860423
17 151.00 -66.00 19860124 19860423
17 143.00 -65.00 19860124 19860423
17 144.00 -65.00 19860124 19860423
17 145.00 -65.00 19860124 19860423
17 146.00 -65.00 19860124 19860423
17 135.00 -49.00 19860126 19860425
17 136.00 -49.00 19860126 19860425
17 152.00 -66.00 19860127 19860426
17 153.00 -66.00 19860127 19860426
17 154.00 -66.00 19860127 19860426
17 147.00 -65.00 19860127 19860426
17 148.00 -65.00 19860127 19860426
17 149.00 -65.00 19860127 19860426
17 150.00 -65.00 19860127 19860426
17 151.00 -65.00 19860127 19860426
17 152.00 -65.00 19860127 19860426
17 153.00 -65.00 19860127 19860426
17 154.00 -65.00 19860127 19860426
17 151.00 -64.00 19860127 19860426
17 140.00 -53.00 19860127 19860426
17 138.00 -52.00 19860127 19860426
17 139.00 -52.00 19860127 19860426
17 140.00 -52.00 19860127 19860426
17 141.00 -52.00 19860127 19860426
17 142.00 -52.00 19860127 19860426
17 137.00 -51.00 19860127 19860426
17 138.00 -51.00 19860127 19860426
17 139.00 -51.00 19860127 19860426
17 140.00 -51.00 19860127 19860426
17 141.00 -51.00 19860127 19860426
17 136.00 -50.00 19860127 19860426
17 151.00 -67.00 19860128 19860427
17 152.00 -67.00 19860128 19860427
17 153.00 -67.00 19860128 19860427
17 154.00 -67.00 19860128 19860427
17 144.00 -55.00 19860130 19860429
17 143.00 -54.00 19860130 19860429
17 144.00 -54.00 19860130 19860429
17 147.00 -64.00 19860131 19860430
17 148.00 -64.00 19860131 19860430
17 146.00 -63.00 19860131 19860430
17 147.00 -63.00 19860131 19860430
17 152.00 -50.00 19860131 19860430
17 149.00 -64.00 19860201 19860501
17 150.00 -64.00 19860201 19860501
17 151.00 -51.00 19860201 19860501
17 -151.00 -60.00 19860202 19860502
17 132.00 -53.00 19860210 19860510
17 155.00 -66.00 19860211 19860511
17 156.00 -66.00 19860211 19860511
17 157.00 -66.00 19860211 19860511
17 155.00 -65.00 19860211 19860511
17 156.00 -65.00 19860211 19860511
17 154.00 -64.00 19860211 19860511
17 155.00 -64.00 19860211 19860511
17 133.00 -53.00 19860211 19860511
17 135.00 -53.00 19860211 19860511
17 138.00 -53.00 19860211 19860511
17 139.00 -53.00 19860211 19860511
17 137.00 -52.00 19860211 19860511
17 136.00 -51.00 19860211 19860511
17 135.00 -50.00 19860211 19860511
17 134.00 -49.00 19860211 19860511
17 133.00 -48.00 19860211 19860511
17 155.00 -67.00 19860212 19860512
17 156.00 -67.00 19860212 19860512
17 157.00 -67.00 19860212 19860512
17 158.00 -67.00 19860213 19860513
17 159.00 -67.00 19860213 19860513
17 160.00 -67.00 19860213 19860513
17 156.00 -64.00 19860213 19860513
17 157.00 -64.00 19860213 19860513
17 170.00 -65.00 19860218 19860518
17 158.00 -66.00 19860226 19860526
17 159.00 -66.00 19860226 19860526
17 160.00 -66.00 19860226 19860526
17 161.00 -66.00 19860226 19860526
17 162.00 -66.00 19860226 19860526
17 163.00 -66.00 19860226 19860526
17 164.00 -66.00 19860226 19860526
17 165.00 -66.00 19860226 19860526
17 157.00 -65.00 19860226 19860526
17 158.00 -65.00 19860226 19860526
17 159.00 -65.00 19860226 19860526
17 160.00 -65.00 19860226 19860526
17 161.00 -65.00 19860226 19860526
17 166.00 -65.00 19860226 19860526
17 158.00 -64.00 19860226 19860526
17 159.00 -64.00 19860226 19860526
17 160.00 -64.00 19860226 19860526
17 161.00 -64.00 19860226 19860526
17 166.00 -64.00 19860226 19860526
17 167.00 -64.00 19860226 19860526
17 153.00 -63.00 19860226 19860526
17 154.00 -63.00 19860226 19860526
17 155.00 -63.00 19860226 19860526
17 156.00 -63.00 19860226 19860526
17 157.00 -63.00 19860226 19860526
17 158.00 -63.00 19860226 19860526
17 159.00 -63.00 19860226 19860526
17 160.00 -63.00 19860226 19860526
17 161.00 -63.00 19860226 19860526
17 153.00 -62.00 19860226 19860526
17 154.00 -62.00 19860226 19860526
17 155.00 -62.00 19860226 19860526
17 156.00 -62.00 19860226 19860526
17 157.00 -62.00 19860226 19860526
17 158.00 -62.00 19860226 19860526
17 153.00 -61.00 19860226 19860526
17 154.00 -61.00 19860226 19860526
17 155.00 -61.00 19860226 19860526
17 -154.00 -62.00 19860227 19860527
17 -155.00 -61.00 19860227 19860527
17 -154.00 -61.00 19860227 19860527
17 150.00 -61.00 19860227 19860527
17 151.00 -61.00 19860227 19860527
17 152.00 -61.00 19860227 19860527
17 156.00 -61.00 19860227 19860527
17 155.00 -60.00 19860227 19860527
17 156.00 -60.00 19860227 19860527
17 153.00 -59.00 19860227 19860527
17 -155.00 -58.00 19860227 19860527
17 -153.00 -61.00 19860228 19860528
17 -153.00 -60.00 19860228 19860528
17 -153.00 -59.00 19860228 19860528
17 -152.00 -59.00 19860228 19860528
17 -151.00 -59.00 19860228 19860528
17 -154.00 -58.00 19860228 19860528
17 -153.00 -58.00 19860228 19860528
17 157.00 -61.00 19860302 19860530
17 154.00 -59.00 19860302 19860530
17 155.00 -59.00 19860302 19860530
17 168.00 -65.00 19860303 19860531
17 169.00 -65.00 19860303 19860531
17 -156.00 -63.00 19860303 19860531
17 -158.00 -62.00 19860303 19860531
17 -157.00 -62.00 19860303 19860531
17 -156.00 -62.00 19860303 19860531
17 -155.00 -62.00 19860303 19860531
17 -156.00 -61.00 19860303 19860531
17 156.00 -59.00 19860305 19860602
17 155.00 -58.00 19860305 19860602
17 156.00 -58.00 19860305 19860602
17 156.00 -57.00 19860305 19860602
17 134.00 -54.00 19860305 19860602
17 162.00 -65.00 19860306 19860603
17 163.00 -65.00 19860306 19860603
17 164.00 -65.00 19860306 19860603
17 165.00 -65.00 19860306 19860603
17 162.00 -64.00 19860306 19860603
17 163.00 -64.00 19860306 19860603
17 164.00 -64.00 19860306 19860603
17 165.00 -64.00 19860306 19860603
17 162.00 -63.00 19860306 19860603
17 163.00 -63.00 19860306 19860603
17 164.00 -63.00 19860306 19860603
17 165.00 -63.00 19860306 19860603
17 166.00 -63.00 19860306 19860603
17 162.00 -62.00 19860306 19860603
17 163.00 -62.00 19860306 19860603
17 130.00 -53.00 19860309 19860606
17 138.00 -56.00 19860310 19860607
17 139.00 -56.00 19860310 19860607
17 134.00 -55.00 19860310 19860607
17 135.00 -55.00 19860310 19860607
17 136.00 -55.00 19860310 19860607
17 137.00 -55.00 19860310 19860607
17 138.00 -55.00 19860310 19860607
17 139.00 -55.00 19860310 19860607
17 140.00 -55.00 19860310 19860607
17 135.00 -54.00 19860310 19860607
17 136.00 -54.00 19860310 19860607
17 137.00 -54.00 19860310 19860607
17 138.00 -54.00 19860310 19860607
17 140.00 -54.00 19860310 19860607
17 131.00 -53.00 19860310 19860607
17 134.00 -53.00 19860310 19860607
17 164.00 -62.00 19860311 19860608
17 152.00 -58.00 19860311 19860608
17 153.00 -58.00 19860311 19860608
17 154.00 -58.00 19860311 19860608
17 144.00 -56.00 19860311 19860608
17 145.00 -56.00 19860311 19860608
17 146.00 -56.00 19860311 19860608
17 141.00 -55.00 19860311 19860608
17 143.00 -55.00 19860311 19860608
17 141.00 -54.00 19860311 19860608
17 142.00 -54.00 19860311 19860608
17 141.00 -53.00 19860311 19860608
17 142.00 -53.00 19860311 19860608
17 143.00 -53.00 19860311 19860608
17 144.00 -53.00 19860311 19860608
17 143.00 -52.00 19860311 19860608
17 161.00 -67.00 19860312 19860609
17 162.00 -67.00 19860312 19860609
17 163.00 -67.00 19860312 19860609
17 164.00 -67.00 19860312 19860609
17 165.00 -67.00 19860312 19860609
17 166.00 -67.00 19860312 19860609
17 167.00 -67.00 19860312 19860609
17 168.00 -67.00 19860312 19860609
17 169.00 -67.00 19860312 19860609
17 170.00 -67.00 19860312 19860609
17 166.00 -66.00 19860312 19860609
17 167.00 -66.00 19860312 19860609
17 168.00 -66.00 19860312 19860609
17 169.00 -66.00 19860312 19860609
17 170.00 -66.00 19860312 19860609
17 147.00 -56.00 19860312 19860609
17 145.00 -55.00 19860312 19860609
17 146.00 -55.00 19860312 19860609
17 145.00 -54.00 19860312 19860609
17 151.00 -57.00 19860313 19860610
17 152.00 -57.00 19860313 19860610
17 153.00 -57.00 19860313 19860610
17 154.00 -57.00 19860313 19860610
17 155.00 -57.00 19860313 19860610
17 148.00 -56.00 19860313 19860610
17 149.00 -56.00 19860313 19860610
17 150.00 -56.00 19860313 19860610
17 154.00 -56.00 19860313 19860610
17 155.00 -56.00 19860313 19860610
17 147.00 -55.00 19860313 19860610
17 148.00 -55.00 19860313 19860610
17 149.00 -55.00 19860313 19860610
17 150.00 -55.00 19860313 19860610
17 146.00 -54.00 19860313 19860610
17 147.00 -54.00 19860313 19860610
17 145.00 -53.00 19860313 19860610
17 173.00 -71.00 19860314 19860611
17 174.00 -71.00 19860314 19860611
17 175.00 -71.00 19860314 19860611
17 172.00 -70.00 19860314 19860611
17 173.00 -70.00 19860314 19860611
17 174.00 -70.00 19860314 19860611
17 175.00 -70.00 19860314 19860611
17 167.00 -69.00 19860314 19860611
17 168.00 -69.00 19860314 19860611
17 169.00 -69.00 19860314 19860611
17 170.00 -69.00 19860314 19860611
17 171.00 -69.00 19860314 19860611
17 165.00 -68.00 19860314 19860611
17 166.00 -68.00 19860314 19860611
17 167.00 -68.00 19860314 19860611
17 168.00 -68.00 19860314 19860611
17 169.00 -68.00 19860314 19860611
17 175.00 -67.00 19860314 19860611
17 -153.00 -74.00 19860316 19860613
17 176.00 -71.00 19860316 19860613
17 -158.00 -76.00 19860317 19860614
17 -157.00 -76.00 19860317 19860614
17 -156.00 -76.00 19860317 19860614
17 -155.00 -76.00 19860317 19860614
17 -154.00 -76.00 19860317 19860614
17 -153.00 -76.00 19860317 19860614
17 -156.00 -75.00 19860317 19860614
17 -155.00 -75.00 19860317 19860614
17 -154.00 -75.00 19860317 19860614
17 -153.00 -75.00 19860317 19860614
17 -152.00 -75.00 19860317 19860614
17 -151.00 -75.00 19860317 19860614
17 -150.00 -75.00 19860317 19860614
17 -151.00 -74.00 19860317 19860614
17 163.00 -68.00 19860320 19860617
17 164.00 -68.00 19860320 19860617
17 -156.00 -60.00 19860320 19860617
17 -155.00 -60.00 19860320 19860617
17 -154.00 -60.00 19860320 19860617
17 -157.00 -59.00 19860320 19860617
17 -156.00 -59.00 19860320 19860617
17 -155.00 -59.00 19860320 19860617
17 -154.00 -59.00 19860320 19860617
17 -158.00 -58.00 19860320 19860617
17 -157.00 -58.00 19860320 19860617
17 -156.00 -58.00 19860320 19860617
17 -158.00 -57.00 19860320 19860617
17 -157.00 -57.00 19860320 19860617
17 176.00 -72.00 19860321 19860618
17 -158.00 -67.00 19860321 19860618
17 157.00 -57.00 19860321 19860618
17 -178.00 -74.00 19860322 19860619
17 -177.00 -74.00 19860322 19860619
17 -176.00 -74.00 19860322 19860619
17 -161.00 -74.00 19860322 19860619
17 -180.00 -73.00 19860322 19860619
17 -179.00 -73.00 19860322 19860619
17 176.00 -73.00 19860322 19860619
17 177.00 -73.00 19860322 19860619
17 178.00 -73.00 19860322 19860619
17 179.00 -73.00 19860322 19860619
17 -162.00 -77.00 19860323 19860620
17 -160.00 -76.00 19860323 19860620
17 -159.00 -76.00 19860323 19860620
17 -160.00 -75.00 19860323 19860620
17 -159.00 -75.00 19860323 19860620
17 -158.00 -75.00 19860323 19860620
17 -157.00 -75.00 19860323 19860620
17 -160.00 -74.00 19860323 19860620
17 -159.00 -74.00 19860323 19860620
17 -157.00 -67.00 19860323 19860620
17 161.00 -62.00 19860324 19860621
17 160.00 -60.00 19860324 19860621
17 161.00 -60.00 19860324 19860621
17 157.00 -58.00 19860324 19860621
17 158.00 -58.00 19860324 19860621
17 151.00 -56.00 19860324 19860621
17 152.00 -56.00 19860324 19860621
17 153.00 -56.00 19860324 19860621
17 151.00 -55.00 19860324 19860621
17 152.00 -55.00 19860324 19860621
17 153.00 -55.00 19860324 19860621
17 153.00 -54.00 19860324 19860621
17 172.00 -69.00 19860325 19860622
17 173.00 -69.00 19860325 19860622
17 174.00 -69.00 19860325 19860622
17 170.00 -68.00 19860325 19860622
17 171.00 -68.00 19860325 19860622
17 172.00 -68.00 19860325 19860622
17 173.00 -68.00 19860325 19860622
17 174.00 -68.00 19860325 19860622
17 171.00 -67.00 19860325 19860622
17 172.00 -67.00 19860325 19860622
17 173.00 -67.00 19860325 19860622
17 174.00 -67.00 19860325 19860622
17 176.00 -67.00 19860325 19860622
17 171.00 -66.00 19860325 19860622
17 172.00 -66.00 19860325 19860622
17 173.00 -66.00 19860325 19860622
17 174.00 -66.00 19860325 19860622
17 175.00 -66.00 19860325 19860622
17 176.00 -66.00 19860325 19860622
17 167.00 -65.00 19860325 19860622
17 -178.00 -73.00 19860326 19860623
17 -177.00 -73.00 19860326 19860623
17 -176.00 -73.00 19860326 19860623
17 -175.00 -73.00 19860326 19860623
17 -174.00 -73.00 19860326 19860623
17 -173.00 -73.00 19860326 19860623
17 -172.00 -73.00 19860326 19860623
17 -163.00 -73.00 19860326 19860623
17 -162.00 -73.00 19860326 19860623
17 -180.00 -72.00 19860326 19860623
17 -179.00 -72.00 19860326 19860623
17 -178.00 -72.00 19860326 19860623
17 -177.00 -72.00 19860326 19860623
17 -176.00 -72.00 19860326 19860623
17 -175.00 -72.00 19860326 19860623
17 -174.00 -72.00 19860326 19860623
17 -173.00 -72.00 19860326 19860623
17 -172.00 -72.00 19860326 19860623
17 -171.00 -72.00 19860326 19860623
17 -170.00 -72.00 19860326 19860623
17 -169.00 -72.00 19860326 19860623
17 177.00 -72.00 19860326 19860623
17 178.00 -72.00 19860326 19860623
17 179.00 -72.00 19860326 19860623
17 -180.00 -71.00 19860326 19860623
17 -179.00 -71.00 19860326 19860623
17 -178.00 -71.00 19860326 19860623
17 -177.00 -71.00 19860326 19860623
17 -176.00 -71.00 19860326 19860623
17 -175.00 -71.00 19860326 19860623
17 -174.00 -71.00 19860326 19860623
17 -173.00 -71.00 19860326 19860623
17 -172.00 -71.00 19860326 19860623
17 -171.00 -71.00 19860326 19860623
17 -170.00 -71.00 19860326 19860623
17 177.00 -71.00 19860326 19860623
17 178.00 -71.00 19860326 19860623
17 179.00 -71.00 19860326 19860623
17 -180.00 -70.00 19860326 19860623
17 -179.00 -70.00 19860326 19860623
17 -178.00 -70.00 19860326 19860623
17 -177.00 -70.00 19860326 19860623
17 -176.00 -70.00 19860326 19860623
17 -175.00 -70.00 19860326 19860623
17 -174.00 -70.00 19860326 19860623
17 -173.00 -70.00 19860326 19860623
17 176.00 -70.00 19860326 19860623
17 177.00 -70.00 19860326 19860623
17 178.00 -70.00 19860326 19860623
17 179.00 -70.00 19860326 19860623
17 -180.00 -69.00 19860326 19860623
17 175.00 -69.00 19860326 19860623
17 176.00 -69.00 19860326 19860623
17 177.00 -69.00 19860326 19860623
17 178.00 -69.00 19860326 19860623
17 179.00 -69.00 19860326 19860623
17 175.00 -68.00 19860326 19860623
17 176.00 -68.00 19860326 19860623
17 177.00 -68.00 19860326 19860623
17 178.00 -68.00 19860326 19860623
17 179.00 -68.00 19860326 19860623
17 -180.00 -67.00 19860326 19860623
17 177.00 -67.00 19860326 19860623
17 178.00 -67.00 19860326 19860623
17 179.00 -67.00 19860326 19860623
17 153.00 -53.00 19860329 19860626
17 154.00 -52.00 19860329 19860626
17 155.00 -52.00 19860329 19860626
17 153.00 -51.00 19860330 19860627
17 153.00 -52.00 19860401 19860629
17 152.00 -51.00 19860401 19860629
17 -161.00 -76.00 19860406 19860704
17 -149.00 -75.00 19860406 19860704
17 -158.00 -74.00 19860406 19860704
17 -157.00 -74.00 19860406 19860704
17 -156.00 -74.00 19860406 19860704
17 -152.00 -74.00 19860406 19860704
17 -144.00 -74.00 19860406 19860704
17 -142.00 -73.00 19860406 19860704
17 -156.00 -69.00 19860412 19860710
17 -163.00 -68.00 19860412 19860710
17 -162.00 -68.00 19860412 19860710
17 -161.00 -68.00 19860412 19860710
17 -160.00 -68.00 19860412 19860710
17 -159.00 -68.00 19860412 19860710
17 -148.00 -75.00 19860413 19860711
17 -150.00 -74.00 19860413 19860711
17 -149.00 -74.00 19860413 19860711
17 -148.00 -74.00 19860413 19860711
17 -147.00 -74.00 19860413 19860711
17 -146.00 -74.00 19860413 19860711
17 -145.00 -74.00 19860413 19860711
17 -150.00 -73.00 19860413 19860711
17 -149.00 -73.00 19860413 19860711
17 -148.00 -73.00 19860413 19860711
17 -147.00 -73.00 19860413 19860711
17 -146.00 -73.00 19860413 19860711
17 -145.00 -73.00 19860413 19860711
17 -144.00 -73.00 19860413 19860711
17 -143.00 -73.00 19860413 19860711
17 -149.00 -72.00 19860413 19860711
17 -148.00 -72.00 19860413 19860711
17 -147.00 -72.00 19860413 19860711
17 -146.00 -72.00 19860413 19860711
17 -145.00 -72.00 19860413 19860711
17 -144.00 -72.00 19860413 19860711
17 -143.00 -72.00 19860413 19860711
17 -141.00 -72.00 19860413 19860711
17 -154.00 -70.00 19860413 19860711
17 -153.00 -70.00 19860413 19860711
17 -155.00 -69.00 19860413 19860711
17 -158.00 -68.00 19860413 19860711
17 -157.00 -68.00 19860413 19860711
17 -156.00 -68.00 19860413 19860711
17 -161.00 -67.00 19860413 19860711
17 -160.00 -67.00 19860413 19860711
17 -159.00 -67.00 19860413 19860711
17 174.00 -65.00 19860420 19860718
17 175.00 -65.00 19860420 19860718
17 -173.00 -69.00 19860422 19860720
17 -172.00 -69.00 19860422 19860720
17 -179.00 -68.00 19860422 19860720
17 -178.00 -68.00 19860422 19860720
17 -177.00 -68.00 19860422 19860720
17 -176.00 -68.00 19860422 19860720
17 -175.00 -68.00 19860422 19860720
17 -174.00 -68.00 19860422 19860720
17 -178.00 -67.00 19860422 19860720
17 -179.00 -69.00 19860423 19860721
17 -178.00 -69.00 19860423 19860721
17 -180.00 -68.00 19860423 19860721
17 -179.00 -67.00 19860423 19860721
17 159.00 -62.00 19860423 19860721
17 160.00 -62.00 19860423 19860721
17 170.00 -62.00 19860423 19860721
17 158.00 -61.00 19860423 19860721
17 159.00 -61.00 19860423 19860721
17 160.00 -61.00 19860423 19860721
17 161.00 -61.00 19860423 19860721
17 157.00 -60.00 19860423 19860721
17 158.00 -60.00 19860423 19860721
17 159.00 -60.00 19860423 19860721
17 162.00 -60.00 19860423 19860721
17 163.00 -60.00 19860423 19860721
17 157.00 -59.00 19860423 19860721
17 158.00 -59.00 19860423 19860721
17 159.00 -59.00 19860423 19860721
17 160.00 -59.00 19860423 19860721
17 161.00 -59.00 19860423 19860721
17 162.00 -59.00 19860423 19860721
17 159.00 -58.00 19860423 19860721
17 -177.00 -69.00 19860424 19860722
17 -176.00 -69.00 19860424 19860722
17 -175.00 -69.00 19860424 19860722
17 -174.00 -69.00 19860424 19860722
17 169.00 -64.00 19860424 19860722
17 172.00 -64.00 19860424 19860722
17 173.00 -64.00 19860424 19860722
17 174.00 -64.00 19860424 19860722
17 175.00 -64.00 19860424 19860722
17 169.00 -63.00 19860424 19860722
17 173.00 -63.00 19860424 19860722
17 165.00 -62.00 19860424 19860722
17 166.00 -62.00 19860424 19860722
17 167.00 -62.00 19860424 19860722
17 168.00 -62.00 19860424 19860722
17 169.00 -62.00 19860424 19860722
17 162.00 -61.00 19860425 19860723
17 163.00 -61.00 19860425 19860723
17 164.00 -61.00 19860425 19860723
17 165.00 -61.00 19860425 19860723
17 166.00 -61.00 19860425 19860723
17 167.00 -61.00 19860425 19860723
17 168.00 -61.00 19860425 19860723
17 169.00 -61.00 19860425 19860723
17 164.00 -60.00 19860425 19860723
17 166.00 -60.00 19860425 19860723
17 167.00 -60.00 19860425 19860723
17 168.00 -60.00 19860425 19860723
17 170.00 -64.00 19860427 19860725
17 165.00 -60.00 19860427 19860725
17 164.00 -59.00 19860427 19860725
17 -148.00 -71.00 19860502 19860730
17 -146.00 -71.00 19860502 19860730
17 -145.00 -71.00 19860502 19860730
17 -152.00 -70.00 19860502 19860730
17 -151.00 -70.00 19860502 19860730
17 -150.00 -70.00 19860502 19860730
17 -149.00 -70.00 19860502 19860730
17 -148.00 -70.00 19860502 19860730
17 -147.00 -70.00 19860502 19860730
17 -146.00 -70.00 19860502 19860730
17 -154.00 -69.00 19860502 19860730
17 -153.00 -69.00 19860502 19860730
17 -152.00 -69.00 19860502 19860730
17 -151.00 -69.00 19860502 19860730
17 -150.00 -69.00 19860502 19860730
17 -149.00 -69.00 19860502 19860730
17 -148.00 -69.00 19860502 19860730
17 -147.00 -69.00 19860502 19860730
17 -146.00 -69.00 19860502 19860730
17 -155.00 -68.00 19860502 19860730
17 -154.00 -68.00 19860502 19860730
17 -153.00 -68.00 19860502 19860730
17 -152.00 -68.00 19860502 19860730
17 -151.00 -68.00 19860502 19860730
17 -150.00 -68.00 19860502 19860730
17 -149.00 -68.00 19860502 19860730
17 -148.00 -68.00 19860502 19860730
17 -156.00 -67.00 19860502 19860730
17 -155.00 -67.00 19860502 19860730
17 -154.00 -67.00 19860502 19860730
17 -153.00 -67.00 19860502 19860730
17 -152.00 -67.00 19860502 19860730
17 -151.00 -67.00 19860502 19860730
17 -150.00 -67.00 19860502 19860730
17 -149.00 -67.00 19860502 19860730
17 -155.00 -66.00 19860502 19860730
17 -154.00 -66.00 19860502 19860730
17 -153.00 -66.00 19860502 19860730
17 -152.00 -66.00 19860502 19860730
17 -151.00 -66.00 19860502 19860730
17 -156.00 -65.00 19860502 19860730
17 -155.00 -65.00 19860502 19860730
17 -154.00 -65.00 19860502 19860730
17 -153.00 -65.00 19860502 19860730
17 -156.00 -64.00 19860502 19860730
17 -155.00 -64.00 19860502 19860730
17 -154.00 -64.00 19860502 19860730
17 -139.00 -72.00 19860503 19860731
17 -138.00 -72.00 19860503 19860731
17 -137.00 -72.00 19860503 19860731
17 -136.00 -72.00 19860503 19860731
17 -135.00 -72.00 19860503 19860731
17 -151.00 -71.00 19860503 19860731
17 -150.00 -71.00 19860503 19860731
17 -149.00 -71.00 19860503 19860731
17 -147.00 -71.00 19860503 19860731
17 -144.00 -71.00 19860503 19860731
17 -143.00 -71.00 19860503 19860731
17 -142.00 -71.00 19860503 19860731
17 -141.00 -71.00 19860503 19860731
17 -140.00 -71.00 19860503 19860731
17 -139.00 -71.00 19860503 19860731
17 -138.00 -71.00 19860503 19860731
17 -158.00 -73.00 19860506 19860803
17 -156.00 -73.00 19860506 19860803
17 -155.00 -73.00 19860506 19860803
17 -154.00 -73.00 19860506 19860803
17 -153.00 -73.00 19860506 19860803
17 -152.00 -73.00 19860506 19860803
17 -151.00 -73.00 19860506 19860803
17 -158.00 -72.00 19860506 19860803
17 -157.00 -72.00 19860506 19860803
17 -156.00 -72.00 19860506 19860803
17 -155.00 -72.00 19860506 19860803
17 -154.00 -72.00 19860506 19860803
17 -153.00 -72.00 19860506 19860803
17 -152.00 -72.00 19860506 19860803
17 -151.00 -72.00 19860506 19860803
17 -150.00 -72.00 19860506 19860803
17 -158.00 -71.00 19860506 19860803
17 -157.00 -71.00 19860506 19860803
17 -156.00 -71.00 19860506 19860803
17 -155.00 -71.00 19860506 19860803
17 -154.00 -71.00 19860506 19860803
17 -153.00 -71.00 19860506 19860803
17 -152.00 -71.00 19860506 19860803
17 -158.00 -70.00 19860506 19860803
17 -157.00 -70.00 19860506 19860803
17 -156.00 -70.00 19860506 19860803
17 -155.00 -70.00 19860506 19860803
17 -159.00 -69.00 19860506 19860803
17 -158.00 -69.00 19860506 19860803
17 -157.00 -69.00 19860506 19860803
17 151.00 -53.00 19860507 19860804
17 152.00 -53.00 19860507 19860804
17 -168.00 -72.00 19860509 19860806
17 -167.00 -72.00 19860509 19860806
17 -166.00 -72.00 19860509 19860806
17 -165.00 -72.00 19860509 19860806
17 -164.00 -72.00 19860509 19860806
17 -163.00 -72.00 19860509 19860806
17 -169.00 -71.00 19860509 19860806
17 -168.00 -71.00 19860509 19860806
17 -167.00 -71.00 19860509 19860806
17 -166.00 -71.00 19860509 19860806
17 -172.00 -70.00 19860509 19860806
17 -171.00 -70.00 19860509 19860806
17 -170.00 -70.00 19860509 19860806
17 -169.00 -70.00 19860509 19860806
17 -171.00 -69.00 19860509 19860806
17 -170.00 -69.00 19860509 19860806
17 -155.00 -74.00 19860510 19860807
17 -154.00 -74.00 19860510 19860807
17 -161.00 -73.00 19860510 19860807
17 -160.00 -73.00 19860510 19860807
17 -159.00 -73.00 19860510 19860807
17 -157.00 -73.00 19860510 19860807
17 -162.00 -72.00 19860510 19860807
17 -161.00 -72.00 19860510 19860807
17 -160.00 -72.00 19860510 19860807
17 -159.00 -72.00 19860510 19860807
17 -165.00 -71.00 19860510 19860807
17 -164.00 -71.00 19860510 19860807
17 -163.00 -71.00 19860510 19860807
17 -162.00 -71.00 19860510 19860807
17 -161.00 -71.00 19860510 19860807
17 -160.00 -71.00 19860510 19860807
17 -159.00 -71.00 19860510 19860807
17 -168.00 -70.00 19860510 19860807
17 -167.00 -70.00 19860510 19860807
17 -166.00 -70.00 19860510 19860807
17 -165.00 -70.00 19860510 19860807
17 -161.00 -70.00 19860510 19860807
17 -160.00 -70.00 19860510 19860807
17 -159.00 -70.00 19860510 19860807
17 -161.00 -69.00 19860510 19860807
17 -160.00 -69.00 19860511 19860808
17 170.00 -63.00 19860511 19860808
17 171.00 -63.00 19860511 19860808
17 172.00 -63.00 19860511 19860808
17 151.00 -52.00 19860526 19860823
17 152.00 -52.00 19860526 19860823

Patch 18 of 3734, Core period: 20050520-20050825
18 -160.00 -68.00 20050216 20050516
18 -159.00 -68.00 20050217 20050517
18 -158.00 -68.00 20050217 20050517
18 -157.00 -68.00 20050217 20050517
18 -160.00 -69.00 20050223 20050523
18 -159.00 -69.00 20050223 20050523
18 -158.00 -69.00 20050224 20050524
18 -163.00 -68.00 20050224 20050524
18 -162.00 -68.00 20050224 20050524
18 -161.00 -68.00 20050224 20050524
18 -166.00 -69.00 20050303 20050531
18 -165.00 -69.00 20050303 20050531
18 -164.00 -69.00 20050303 20050531
18 -163.00 -69.00 20050303 20050531
18 -161.00 -69.00 20050303 20050531
18 -164.00 -68.00 20050303 20050531
18 -162.00 -69.00 20050306 20050603
18 -161.00 -71.00 20050421 20050719
18 -160.00 -71.00 20050421 20050719
18 -159.00 -71.00 20050421 20050719
18 -161.00 -70.00 20050421 20050719
18 -160.00 -70.00 20050421 20050719
18 -159.00 -70.00 20050421 20050719
18 -158.00 -70.00 20050421 20050719
18 -163.00 -77.00 20050422 20050720
18 -162.00 -77.00 20050422 20050720
18 -161.00 -77.00 20050422 20050720
18 -161.00 -76.00 20050422 20050720
18 -160.00 -76.00 20050428 20050726
18 -172.00 -76.00 20050519 20050816
18 -175.00 -75.00 20050519 20050816
18 -174.00 -75.00 20050519 20050816
18 -173.00 -75.00 20050519 20050816
18 -172.00 -75.00 20050519 20050816
18 -171.00 -75.00 20050519 20050816
18 -170.00 -75.00 20050519 20050816
18 -169.00 -75.00 20050519 20050816
18 -168.00 -75.00 20050519 20050816
18 -167.00 -75.00 20050519 20050816
18 -166.00 -75.00 20050519 20050816
18 -165.00 -75.00 20050519 20050816
18 -164.00 -75.00 20050519 20050816
18 -163.00 -75.00 20050519 20050816
18 -178.00 -74.00 20050519 20050816
18 -177.00 -74.00 20050519 20050816
18 -176.00 -74.00 20050519 20050816
18 -175.00 -74.00 20050519 20050816
18 -174.00 -74.00 20050519 20050816
18 -173.00 -74.00 20050519 20050816
18 -172.00 -74.00 20050519 20050816
18 -171.00 -74.00 20050519 20050816
18 -170.00 -74.00 20050519 20050816
18 -169.00 -74.00 20050519 20050816
18 -168.00 -74.00 20050519 20050816
18 -167.00 -74.00 20050519 20050816
18 -166.00 -74.00 20050519 20050816
18 -165.00 -74.00 20050519 20050816
18 -164.00 -74.00 20050519 20050816
18 -163.00 -74.00 20050519 20050816
18 -162.00 -74.00 20050519 20050816
18 -161.00 -74.00 20050519 20050816
18 -180.00 -73.00 20050519 20050816
18 -179.00 -73.00 20050519 20050816
18 -178.00 -73.00 20050519 20050816
18 -177.00 -73.00 20050519 20050816
18 -176.00 -73.00 20050519 20050816
18 -175.00 -73.00 20050519 20050816
18 -174.00 -73.00 20050519 20050816
18 -173.00 -73.00 20050519 20050816
18 -172.00 -73.00 20050519 20050816
18 -165.00 -73.00 20050519 20050816
18 -177.00 -72.00 20050519 20050816
18 -176.00 -72.00 20050519 20050816
18 -175.00 -72.00 20050519 20050816
18 -166.00 -78.00 20050520 20050817
18 -170.00 -77.00 20050520 20050817
18 -169.00 -77.00 20050520 20050817
18 -168.00 -77.00 20050520 20050817
18 -167.00 -77.00 20050520 20050817
18 -166.00 -77.00 20050520 20050817
18 -165.00 -77.00 20050520 20050817
18 -171.00 -76.00 20050520 20050817
18 -170.00 -76.00 20050520 20050817
18 -169.00 -76.00 20050520 20050817
18 -168.00 -76.00 20050520 20050817
18 -167.00 -76.00 20050520 20050817
18 -166.00 -76.00 20050520 20050817
18 -165.00 -76.00 20050520 20050817
18 -164.00 -76.00 20050520 20050817
18 -165.00 -78.00 20050522 20050819
18 -164.00 -77.00 20050522 20050819
18 -163.00 -76.00 20050522 20050819
18 -162.00 -76.00 20050522 20050819
18 -162.00 -75.00 20050522 20050819
18 -161.00 -75.00 20050522 20050819
18 -160.00 -75.00 20050522 20050819
18 -160.00 -74.00 20050522 20050819
18 -163.00 -73.00 20050522 20050819
18 -162.00 -73.00 20050522 20050819
18 -161.00 -73.00 20050522 20050819
18 -160.00 -73.00 20050522 20050819
18 -159.00 -73.00 20050522 20050819
18 -160.00 -72.00 20050522 20050819
18 -159.00 -76.00 20050527 20050824
18 -158.00 -76.00 20050527 20050824
18 -157.00 -76.00 20050527 20050824
18 -156.00 -76.00 20050527 20050824
18 -155.00 -76.00 20050527 20050824
18 -154.00 -76.00 20050527 20050824
18 -159.00 -75.00 20050527 20050824
18 -158.00 -75.00 20050527 20050824
18 -157.00 -75.00 20050527 20050824
18 -156.00 -75.00 20050527 20050824
18 -155.00 -75.00 20050527 20050824
18 -154.00 -75.00 20050527 20050824
18 -159.00 -74.00 20050527 20050824
18 -158.00 -74.00 20050527 20050824
18 -157.00 -74.00 20050527 20050824
18 -156.00 -74.00 20050527 20050824
18 -164.00 -73.00 20050527 20050824
18 -153.00 -76.00 20050528 20050825
18 -152.00 -76.00 20050528 20050825
18 -151.00 -76.00 20050528 20050825
18 -150.00 -76.00 20050528 20050825
18 -149.00 -76.00 20050528 20050825
18 -148.00 -76.00 20050528 20050825
18 -153.00 -75.00 20050528 20050825
18 -152.00 -75.00 20050528 20050825
18 -151.00 -75.00 20050528 20050825
18 -150.00 -75.00 20050528 20050825
18 -149.00 -75.00 20050528 20050825
18 -148.00 -75.00 20050528 20050825
18 -155.00 -74.00 20050528 20050825
18 -154.00 -74.00 20050528 20050825
18 -153.00 -74.00 20050528 20050825
18 -152.00 -74.00 20050528 20050825
18 -151.00 -74.00 20050528 20050825
18 -150.00 -74.00 20050528 20050825
18 -149.00 -74.00 20050528 20050825
18 -148.00 -74.00 20050528 20050825
18 -147.00 -74.00 20050528 20050825

Patch 19 of 3734, Core period: 19950307-19950608
19 -162.00 -72.00 19950203 19950503
19 -161.00 -72.00 19950203 19950503
19 -160.00 -72.00 19950220 19950520
19 -163.00 -72.00 19950227 19950527
19 -163.00 -71.00 19950227 19950527
19 -159.00 -71.00 19950227 19950527
19 -158.00 -71.00 19950227 19950527
19 -166.00 -70.00 19950301 19950529
19 166.00 -68.00 19950303 19950531
19 -169.00 -71.00 19950304 19950601
19 -168.00 -71.00 19950304 19950601
19 -167.00 -71.00 19950304 19950601
19 -166.00 -71.00 19950304 19950601
19 -165.00 -71.00 19950304 19950601
19 -164.00 -71.00 19950304 19950601
19 -169.00 -70.00 19950304 19950601
19 -168.00 -70.00 19950304 19950601
19 -167.00 -70.00 19950304 19950601
19 171.00 -69.00 19950305 19950602
19 172.00 -69.00 19950305 19950602
19 167.00 -68.00 19950305 19950602
19 168.00 -68.00 19950305 19950602
19 169.00 -68.00 19950305 19950602
19 170.00 -68.00 19950305 19950602
19 171.00 -68.00 19950305 19950602
19 172.00 -68.00 19950305 19950602
19 173.00 -68.00 19950305 19950602
19 173.00 -69.00 19950306 19950603
19 174.00 -69.00 19950306 19950603
19 174.00 -68.00 19950306 19950603
19 175.00 -68.00 19950306 19950603
19 -174.00 -70.00 19950309 19950606
19 -174.00 -69.00 19950309 19950606
19 -173.00 -69.00 19950309 19950606
19 -172.00 -69.00 19950309 19950606
19 -167.00 -69.00 19950309 19950606
19 175.00 -69.00 19950309 19950606
19 176.00 -69.00 19950309 19950606
19 -175.00 -68.00 19950309 19950606
19 -174.00 -68.00 19950309 19950606
19 -173.00 -68.00 19950309 19950606
19 176.00 -68.00 19950309 19950606
19 175.00 -67.00 19950309 19950606
19 176.00 -67.00 19950309 19950606
19 -180.00 -70.00 19950310 19950607
19 -179.00 -70.00 19950310 19950607
19 -178.00 -70.00 19950310 19950607
19 -177.00 -70.00 19950310 19950607
19 -176.00 -70.00 19950310 19950607
19 -175.00 -70.00 19950310 19950607
19 -173.00 -70.00 19950310 19950607
19 -172.00 -70.00 19950310 19950607
19 -171.00 -70.00 19950310 19950607
19 -170.00 -70.00 19950310 19950607
19 176.00 -70.00 19950310 19950607
19 177.00 -70.00 19950310 19950607
19 178.00 -70.00 19950310 19950607
19 179.00 -70.00 19950310 19950607
19 -180.00 -69.00 19950310 19950607
19 -179.00 -69.00 19950310 19950607
19 -178.00 -69.00 19950310 19950607
19 -177.00 -69.00 19950310 19950607
19 -176.00 -69.00 19950310 19950607
19 -175.00 -69.00 19950310 19950607
19 -171.00 -69.00 19950310 19950607
19 -170.00 -69.00 19950310 19950607
19 -169.00 -69.00 19950310 19950607
19 -168.00 -69.00 19950310 19950607
19 177.00 -69.00 19950310 19950607
19 178.00 -69.00 19950310 19950607
19 179.00 -69.00 19950310 19950607
19 -180.00 -68.00 19950310 19950607
19 -179.00 -68.00 19950310 19950607
19 -178.00 -68.00 19950310 19950607
19 -177.00 -68.00 19950310 19950607
19 -176.00 -68.00 19950310 19950607
19 177.00 -68.00 19950310 19950607
19 178.00 -68.00 19950310 19950607
19 179.00 -68.00 19950310 19950607
19 -180.00 -67.00 19950310 19950607
19 -179.00 -67.00 19950310 19950607
19 -178.00 -67.00 19950310 19950607
19 -177.00 -67.00 19950310 19950607
19 177.00 -67.00 19950310 19950607
19 178.00 -67.00 19950310 19950607
19 179.00 -67.00 19950310 19950607
19 -160.00 -68.00 19950324 19950621
19 -159.00 -68.00 19950324 19950621
19 -166.00 -69.00 19950325 19950622
19 -161.00 -68.00 19950325 19950622
19 -160.00 -71.00 19950327 19950624
19 -165.00 -70.00 19950327 19950624
19 -164.00 -70.00 19950327 19950624
19 -163.00 -70.00 19950327 19950624
19 -162.00 -70.00 19950327 19950624
19 -161.00 -70.00 19950327 19950624
19 -160.00 -70.00 19950327 19950624
19 -159.00 -70.00 19950327 19950624
19 -158.00 -70.00 19950327 19950624
19 -165.00 -69.00 19950327 19950624
19 -164.00 -69.00 19950327 19950624
19 -163.00 -69.00 19950327 19950624
19 -162.00 -69.00 19950327 19950624
19 -161.00 -69.00 19950327 19950624
19 -160.00 -69.00 19950327 19950624
19 -159.00 -69.00 19950327 19950624
19 -164.00 -68.00 19950327 19950624
19 -163.00 -68.00 19950327 19950624
19 -162.00 -68.00 19950327 19950624
19 -162.00 -71.00 19950328 19950625
19 -161.00 -71.00 19950328 19950625
19 -179.00 -71.00 19950419 19950717

Patch 20 of 3734, Core period: 19840202-19840501
20 -177.00 -69.00 19840201 19840430
20 -176.00 -69.00 19840201 19840430
20 -175.00 -69.00 19840201 19840430
20 -174.00 -69.00 19840201 19840430
20 -173.00 -69.00 19840201 19840430
20 -172.00 -69.00 19840201 19840430
20 -180.00 -68.00 19840201 19840430
20 -179.00 -68.00 19840201 19840430
20 -178.00 -68.00 19840201 19840430
20 -177.00 -68.00 19840201 19840430
20 -176.00 -68.00 19840201 19840430
20 177.00 -68.00 19840201 19840430
20 178.00 -68.00 19840201 19840430
20 179.00 -68.00 19840201 19840430
20 174.00 -67.00 19840201 19840430
20 175.00 -67.00 19840201 19840430
20 176.00 -67.00 19840201 19840430
20 177.00 -67.00 19840201 19840430
20 -179.00 -69.00 19840205 19840504
20 -178.00 -69.00 19840205 19840504
20 174.00 -68.00 19840207 19840506
20 175.00 -68.00 19840207 19840506
20 176.00 -68.00 19840207 19840506

Patch 21 of 3734, Core period: 19970220-19970530
21 -171.00 -70.00 19970120 19970419
21 -170.00 -70.00 19970120 19970419
21 -169.00 -70.00 19970120 19970419
21 -168.00 -70.00 19970120 19970419
21 -175.00 -69.00 19970120 19970419
21 -174.00 -69.00 19970120 19970419
21 -173.00 -69.00 19970120 19970419
21 -172.00 -69.00 19970120 19970419
21 -171.00 -69.00 19970120 19970419
21 -170.00 -69.00 19970120 19970419
21 -169.00 -69.00 19970120 19970419
21 -167.00 -71.00 19970125 19970424
21 -166.00 -71.00 19970125 19970424
21 -165.00 -71.00 19970125 19970424
21 -164.00 -71.00 19970125 19970424
21 -172.00 -70.00 19970125 19970424
21 -167.00 -70.00 19970125 19970424
21 -166.00 -70.00 19970125 19970424
21 -176.00 -69.00 19970125 19970424
21 169.00 -69.00 19970125 19970424
21 175.00 -69.00 19970125 19970424
21 163.00 -68.00 19970125 19970424
21 164.00 -68.00 19970125 19970424
21 165.00 -68.00 19970125 19970424
21 166.00 -68.00 19970125 19970424
21 167.00 -68.00 19970125 19970424
21 169.00 -67.00 19970125 19970424
21 -175.00 -70.00 19970126 19970425
21 -174.00 -70.00 19970126 19970425
21 -173.00 -70.00 19970126 19970425
21 172.00 -70.00 19970201 19970501
21 173.00 -70.00 19970201 19970501
21 174.00 -70.00 19970201 19970501
21 175.00 -70.00 19970201 19970501
21 170.00 -69.00 19970201 19970501
21 171.00 -69.00 19970201 19970501
21 172.00 -69.00 19970201 19970501
21 173.00 -69.00 19970201 19970501
21 174.00 -69.00 19970201 19970501
21 176.00 -69.00 19970201 19970501
21 168.00 -68.00 19970201 19970501
21 169.00 -68.00 19970201 19970501
21 170.00 -68.00 19970201 19970501
21 171.00 -68.00 19970201 19970501
21 172.00 -68.00 19970201 19970501
21 173.00 -68.00 19970201 19970501
21 174.00 -68.00 19970201 19970501
21 170.00 -67.00 19970207 19970507
21 171.00 -67.00 19970207 19970507
21 -180.00 -68.00 19970208 19970508
21 -179.00 -68.00 19970208 19970508
21 -178.00 -68.00 19970208 19970508
21 -177.00 -68.00 19970208 19970508
21 175.00 -68.00 19970208 19970508
21 176.00 -68.00 19970208 19970508
21 177.00 -68.00 19970208 19970508
21 178.00 -68.00 19970208 19970508
21 179.00 -68.00 19970208 19970508
21 -180.00 -67.00 19970208 19970508
21 -179.00 -67.00 19970208 19970508
21 172.00 -67.00 19970208 19970508
21 173.00 -67.00 19970208 19970508
21 174.00 -67.00 19970208 19970508
21 175.00 -67.00 19970208 19970508
21 176.00 -67.00 19970208 19970508
21 177.00 -67.00 19970208 19970508
21 179.00 -67.00 19970208 19970508
21 -160.00 -69.00 19970214 19970514
21 -163.00 -71.00 19970219 19970519
21 -176.00 -68.00 19970219 19970519
21 -175.00 -68.00 19970219 19970519
21 -159.00 -68.00 19970219 19970519
21 -158.00 -68.00 19970219 19970519
21 -157.00 -68.00 19970219 19970519
21 -156.00 -68.00 19970219 19970519
21 -178.00 -67.00 19970219 19970519
21 -177.00 -67.00 19970219 19970519
21 -176.00 -67.00 19970219 19970519
21 -172.00 -67.00 19970219 19970519
21 -165.00 -67.00 19970219 19970519
21 -164.00 -67.00 19970219 19970519
21 -163.00 -67.00 19970219 19970519
21 -162.00 -67.00 19970219 19970519
21 -161.00 -67.00 19970219 19970519
21 -160.00 -67.00 19970219 19970519
21 -159.00 -67.00 19970219 19970519
21 -158.00 -67.00 19970219 19970519
21 -157.00 -67.00 19970219 19970519
21 -156.00 -67.00 19970219 19970519
21 -155.00 -67.00 19970219 19970519
21 -154.00 -67.00 19970219 19970519
21 -153.00 -67.00 19970219 19970519
21 -152.00 -67.00 19970219 19970519
21 -151.00 -67.00 19970219 19970519
21 -159.00 -66.00 19970219 19970519
21 -158.00 -66.00 19970219 19970519
21 -157.00 -66.00 19970219 19970519
21 -156.00 -66.00 19970219 19970519
21 -155.00 -66.00 19970219 19970519
21 -154.00 -66.00 19970219 19970519
21 -153.00 -66.00 19970219 19970519
21 -152.00 -66.00 19970219 19970519
21 -159.00 -65.00 19970219 19970519
21 -158.00 -65.00 19970219 19970519
21 -157.00 -65.00 19970219 19970519
21 -156.00 -65.00 19970219 19970519
21 -155.00 -65.00 19970219 19970519
21 -154.00 -65.00 19970219 19970519
21 -157.00 -64.00 19970219 19970519
21 -156.00 -64.00 19970219 19970519
21 -161.00 -63.00 19970219 19970519
21 -160.00 -63.00 19970219 19970519
21 -159.00 -63.00 19970219 19970519
21 -158.00 -63.00 19970219 19970519
21 -157.00 -63.00 19970219 19970519
21 -165.00 -70.00 19970220 19970520
21 -164.00 -70.00 19970220 19970520
21 -163.00 -70.00 19970220 19970520
21 -162.00 -70.00 19970220 19970520
21 -168.00 -69.00 19970220 19970520
21 -167.00 -69.00 19970220 19970520
21 -166.00 -69.00 19970220 19970520
21 -165.00 -69.00 19970220 19970520
21 -164.00 -69.00 19970220 19970520
21 -163.00 -69.00 19970220 19970520
21 -162.00 -69.00 19970220 19970520
21 -161.00 -69.00 19970220 19970520
21 -167.00 -68.00 19970220 19970520
21 -166.00 -68.00 19970220 19970520
21 -165.00 -68.00 19970220 19970520
21 -164.00 -68.00 19970220 19970520
21 -163.00 -68.00 19970220 19970520
21 -162.00 -68.00 19970220 19970520
21 -161.00 -68.00 19970220 19970520
21 -160.00 -68.00 19970220 19970520
21 -174.00 -67.00 19970220 19970520
21 -173.00 -67.00 19970220 19970520
21 -150.00 -67.00 19970220 19970520
21 -149.00 -67.00 19970220 19970520
21 -148.00 -67.00 19970220 19970520
21 -147.00 -67.00 19970220 19970520
21 -146.00 -67.00 19970220 19970520
21 -145.00 -67.00 19970220 19970520
21 -174.00 -66.00 19970220 19970520
21 -173.00 -66.00 19970220 19970520
21 -172.00 -66.00 19970220 19970520
21 -171.00 -66.00 19970220 19970520
21 -170.00 -66.00 19970220 19970520
21 -169.00 -66.00 19970220 19970520
21 -151.00 -66.00 19970220 19970520
21 -150.00 -66.00 19970220 19970520
21 -149.00 -66.00 19970220 19970520
21 -148.00 -66.00 19970220 19970520
21 -147.00 -66.00 19970220 19970520
21 -146.00 -66.00 19970220 19970520
21 -177.00 -65.00 19970220 19970520
21 -176.00 -65.00 19970220 19970520
21 -175.00 -65.00 19970220 19970520
21 -150.00 -65.00 19970220 19970520
21 -149.00 -65.00 19970220 19970520
21 -148.00 -65.00 19970220 19970520
21 -147.00 -65.00 19970220 19970520
21 -146.00 -65.00 19970220 19970520
21 -149.00 -64.00 19970220 19970520
21 -148.00 -64.00 19970220 19970520
21 -163.00 -66.00 19970221 19970521
21 -162.00 -66.00 19970221 19970521
21 -161.00 -66.00 19970221 19970521
21 -160.00 -66.00 19970221 19970521
21 -174.00 -65.00 19970221 19970521
21 -172.00 -65.00 19970221 19970521
21 -171.00 -65.00 19970221 19970521
21 -170.00 -65.00 19970221 19970521
21 -162.00 -65.00 19970221 19970521
21 -153.00 -65.00 19970221 19970521
21 -152.00 -65.00 19970221 19970521
21 -151.00 -65.00 19970221 19970521
21 -177.00 -64.00 19970221 19970521
21 -176.00 -64.00 19970221 19970521
21 -175.00 -64.00 19970221 19970521
21 -152.00 -64.00 19970221 19970521
21 -156.00 -63.00 19970221 19970521
21 -158.00 -62.00 19970221 19970521
21 -174.00 -64.00 19970223 19970523
21 -173.00 -64.00 19970223 19970523
21 -171.00 -68.00 19970224 19970524
21 -170.00 -68.00 19970224 19970524
21 -169.00 -68.00 19970224 19970524
21 -168.00 -68.00 19970224 19970524
21 -171.00 -67.00 19970224 19970524
21 -170.00 -67.00 19970224 19970524
21 -169.00 -67.00 19970224 19970524
21 -168.00 -67.00 19970224 19970524
21 -167.00 -67.00 19970224 19970524
21 -166.00 -67.00 19970224 19970524
21 -168.00 -66.00 19970224 19970524
21 -167.00 -66.00 19970224 19970524
21 -166.00 -66.00 19970224 19970524
21 -165.00 -66.00 19970224 19970524
21 -164.00 -66.00 19970224 19970524
21 -173.00 -65.00 19970224 19970524
21 -169.00 -65.00 19970224 19970524
21 -168.00 -65.00 19970224 19970524
21 -167.00 -65.00 19970224 19970524
21 -166.00 -65.00 19970224 19970524
21 -164.00 -65.00 19970224 19970524
21 -163.00 -65.00 19970224 19970524
21 -172.00 -64.00 19970224 19970524
21 -171.00 -64.00 19970224 19970524
21 -170.00 -64.00 19970224 19970524
21 -169.00 -64.00 19970224 19970524
21 -168.00 -64.00 19970224 19970524
21 -164.00 -64.00 19970224 19970524
21 -163.00 -64.00 19970224 19970524
21 -173.00 -63.00 19970224 19970524
21 -172.00 -63.00 19970224 19970524
21 -171.00 -63.00 19970224 19970524
21 -170.00 -63.00 19970224 19970524
21 -174.00 -62.00 19970224 19970524
21 -173.00 -62.00 19970224 19970524
21 -172.00 -62.00 19970224 19970524
21 -176.00 -61.00 19970224 19970524
21 -175.00 -61.00 19970224 19970524
21 -174.00 -61.00 19970224 19970524
21 -173.00 -61.00 19970224 19970524
21 -176.00 -60.00 19970224 19970524
21 -175.00 -60.00 19970224 19970524
21 -174.00 -60.00 19970224 19970524
21 -173.00 -60.00 19970224 19970524
21 -151.00 -64.00 19970225 19970525
21 -150.00 -64.00 19970225 19970525
21 -145.00 -66.00 19970227 19970527
21 -165.00 -65.00 19970301 19970529
21 -167.00 -64.00 19970301 19970529
21 -166.00 -64.00 19970301 19970529
21 -165.00 -64.00 19970301 19970529
21 -176.00 -63.00 19970301 19970529
21 -175.00 -63.00 19970301 19970529
21 -174.00 -63.00 19970301 19970529
21 -169.00 -63.00 19970301 19970529
21 -168.00 -63.00 19970301 19970529
21 -167.00 -63.00 19970301 19970529
21 -176.00 -62.00 19970301 19970529
21 -175.00 -62.00 19970301 19970529
21 -155.00 -64.00 19970302 19970530
21 -154.00 -64.00 19970302 19970530
21 -153.00 -64.00 19970302 19970530
21 -161.00 -65.00 19970304 19970601
21 -166.00 -63.00 19970304 19970601
21 -171.00 -62.00 19970304 19970601
21 -170.00 -62.00 19970304 19970601
21 -169.00 -62.00 19970304 19970601
21 -172.00 -61.00 19970304 19970601
21 -171.00 -61.00 19970304 19970601
21 -170.00 -61.00 19970304 19970601
21 -169.00 -61.00 19970304 19970601
21 -172.00 -60.00 19970304 19970601
21 -160.00 -65.00 19970306 19970603
21 -162.00 -64.00 19970307 19970604
21 -161.00 -64.00 19970307 19970604
21 -158.00 -64.00 19970319 19970616
21 -162.00 -63.00 19970319 19970616
21 -142.00 -69.00 19970323 19970620
21 -141.00 -69.00 19970323 19970620
21 -142.00 -68.00 19970323 19970620
21 -141.00 -70.00 19970324 19970621
21 -140.00 -70.00 19970324 19970621
21 -139.00 -70.00 19970324 19970621
21 -140.00 -69.00 19970324 19970621
21 -139.00 -69.00 19970324 19970621
21 -160.00 -64.00 19970325 19970622
21 -159.00 -64.00 19970325 19970622
21 -141.00 -68.00 19970326 19970623
21 -140.00 -68.00 19970326 19970623
21 -144.00 -67.00 19970326 19970623
21 -143.00 -67.00 19970326 19970623
21 -142.00 -67.00 19970326 19970623
21 -144.00 -66.00 19970326 19970623
21 -143.00 -66.00 19970326 19970623
21 -142.00 -66.00 19970326 19970623
21 -177.00 -59.00 19970408 19970706
21 -176.00 -59.00 19970408 19970706
21 -175.00 -59.00 19970408 19970706
21 -174.00 -59.00 19970408 19970706
21 -177.00 -58.00 19970408 19970706
21 -162.00 -62.00 19970413 19970711
21 -161.00 -62.00 19970413 19970711
21 -160.00 -62.00 19970413 19970711
21 -159.00 -62.00 19970413 19970711
21 -164.00 -61.00 19970413 19970711
21 -163.00 -61.00 19970413 19970711
21 -164.00 -60.00 19970413 19970711
21 -172.00 -58.00 19970414 19970712
21 -171.00 -58.00 19970414 19970712
21 -170.00 -58.00 19970414 19970712
21 -169.00 -58.00 19970414 19970712
21 -172.00 -57.00 19970414 19970712
21 -171.00 -57.00 19970414 19970712
21 -170.00 -57.00 19970414 19970712
21 -173.00 -56.00 19970414 19970712
21 -172.00 -56.00 19970414 19970712
21 -174.00 -55.00 19970414 19970712
21 -173.00 -55.00 19970414 19970712
21 -174.00 -54.00 19970414 19970712
21 -175.00 -53.00 19970415 19970713
21 -174.00 -53.00 19970415 19970713
21 -175.00 -52.00 19970415 19970713
21 -162.00 -61.00 19970420 19970718
21 -161.00 -61.00 19970420 19970718
21 -163.00 -60.00 19970420 19970718
21 -162.00 -60.00 19970423 19970721
21 -161.00 -60.00 19970423 19970721
21 -164.00 -59.00 19970423 19970721
21 -165.00 -59.00 19970426 19970724
21 -166.00 -58.00 19970426 19970724
21 -165.00 -58.00 19970426 19970724
21 -173.00 -54.00 19970427 19970725
21 -168.00 -59.00 19970429 19970727
21 -167.00 -59.00 19970429 19970727
21 -166.00 -59.00 19970429 19970727
21 -168.00 -58.00 19970429 19970727
21 -167.00 -58.00 19970429 19970727
21 -171.00 -56.00 19970506 19970803
21 -172.00 -55.00 19970506 19970803

Patch 22 of 3734, Core period: 20170325-20170901
22 174.00 -60.00 20170122 20170421
22 173.00 -59.00 20170126 20170425
22 171.00 -59.00 20170127 20170426
22 172.00 -59.00 20170127 20170426
22 171.00 -58.00 20170127 20170426
22 172.00 -58.00 20170127 20170426
22 170.00 -59.00 20170217 20170517
22 169.00 -59.00 20170228 20170528
22 169.00 -60.00 20170301 20170529
22 163.00 -61.00 20170312 20170609
22 164.00 -61.00 20170312 20170609
22 168.00 -61.00 20170312 20170609
22 162.00 -60.00 20170312 20170609
22 163.00 -60.00 20170312 20170609
22 164.00 -60.00 20170312 20170609
22 165.00 -60.00 20170312 20170609
22 166.00 -60.00 20170312 20170609
22 167.00 -60.00 20170312 20170609
22 -156.00 -62.00 20170313 20170610
22 -169.00 -61.00 20170313 20170610
22 -168.00 -61.00 20170313 20170610
22 -169.00 -60.00 20170313 20170610
22 -168.00 -60.00 20170313 20170610
22 -170.00 -61.00 20170314 20170611
22 -165.00 -60.00 20170318 20170615
22 -164.00 -60.00 20170318 20170615
22 -163.00 -60.00 20170318 20170615
22 -162.00 -60.00 20170318 20170615
22 -161.00 -60.00 20170318 20170615
22 165.00 -62.00 20170321 20170618
22 162.00 -61.00 20170321 20170618
22 167.00 -62.00 20170322 20170619
22 -175.00 -64.00 20170323 20170620
22 -174.00 -64.00 20170323 20170620
22 -173.00 -64.00 20170323 20170620
22 -177.00 -63.00 20170323 20170620
22 -176.00 -63.00 20170323 20170620
22 -175.00 -63.00 20170323 20170620
22 -174.00 -63.00 20170323 20170620
22 -173.00 -63.00 20170323 20170620
22 -172.00 -62.00 20170323 20170620
22 -171.00 -62.00 20170323 20170620
22 -162.00 -61.00 20170323 20170620
22 -161.00 -61.00 20170323 20170620
22 170.00 -65.00 20170324 20170621
22 -159.00 -64.00 20170324 20170621
22 -158.00 -64.00 20170324 20170621
22 -157.00 -64.00 20170324 20170621
22 166.00 -64.00 20170324 20170621
22 167.00 -64.00 20170324 20170621
22 -161.00 -63.00 20170324 20170621
22 -160.00 -63.00 20170324 20170621
22 -159.00 -63.00 20170324 20170621
22 -158.00 -63.00 20170324 20170621
22 -157.00 -63.00 20170324 20170621
22 -156.00 -63.00 20170324 20170621
22 -162.00 -62.00 20170324 20170621
22 -161.00 -62.00 20170324 20170621
22 -160.00 -62.00 20170324 20170621
22 -159.00 -62.00 20170324 20170621
22 -158.00 -62.00 20170324 20170621
22 -157.00 -62.00 20170324 20170621
22 168.00 -64.00 20170325 20170622
22 169.00 -64.00 20170325 20170622
22 173.00 -66.00 20170327 20170624
22 171.00 -65.00 20170327 20170624
22 172.00 -65.00 20170327 20170624
22 173.00 -65.00 20170327 20170624
22 174.00 -65.00 20170327 20170624
22 175.00 -65.00 20170327 20170624
22 176.00 -65.00 20170327 20170624
22 177.00 -65.00 20170327 20170624
22 -179.00 -64.00 20170327 20170624
22 -178.00 -64.00 20170327 20170624
22 -177.00 -64.00 20170327 20170624
22 -176.00 -64.00 20170327 20170624
22 170.00 -64.00 20170327 20170624
22 171.00 -64.00 20170327 20170624
22 172.00 -64.00 20170327 20170624
22 173.00 -64.00 20170327 20170624
22 174.00 -64.00 20170327 20170624
22 175.00 -64.00 20170327 20170624
22 -179.00 -63.00 20170327 20170624
22 -178.00 -63.00 20170327 20170624
22 170.00 -63.00 20170327 20170624
22 171.00 -63.00 20170327 20170624
22 172.00 -63.00 20170327 20170624
22 173.00 -63.00 20170327 20170624
22 174.00 -63.00 20170327 20170624
22 168.00 -62.00 20170327 20170624
22 169.00 -62.00 20170327 20170624
22 170.00 -62.00 20170327 20170624
22 169.00 -61.00 20170327 20170624
22 168.00 -60.00 20170327 20170624
22 174.00 -62.00 20170328 20170625
22 175.00 -62.00 20170328 20170625
22 176.00 -62.00 20170328 20170625
22 -180.00 -64.00 20170329 20170626
22 176.00 -64.00 20170329 20170626
22 177.00 -64.00 20170329 20170626
22 178.00 -64.00 20170329 20170626
22 179.00 -64.00 20170329 20170626
22 -180.00 -63.00 20170329 20170626
22 175.00 -63.00 20170329 20170626
22 176.00 -63.00 20170329 20170626
22 177.00 -63.00 20170329 20170626
22 178.00 -63.00 20170329 20170626
22 179.00 -63.00 20170329 20170626
22 -162.00 -72.00 20170330 20170627
22 -163.00 -71.00 20170401 20170629
22 169.00 -66.00 20170403 20170701
22 170.00 -66.00 20170403 20170701
22 171.00 -66.00 20170403 20170701
22 172.00 -66.00 20170403 20170701
22 174.00 -66.00 20170403 20170701
22 175.00 -66.00 20170403 20170701
22 169.00 -65.00 20170403 20170701
22 178.00 -65.00 20170403 20170701
22 -164.00 -61.00 20170404 20170702
22 -163.00 -61.00 20170404 20170702
22 -167.00 -60.00 20170404 20170702
22 -166.00 -60.00 20170404 20170702
22 166.00 -65.00 20170415 20170713
22 167.00 -65.00 20170415 20170713
22 168.00 -65.00 20170415 20170713
22 177.00 -66.00 20170513 20170810
22 178.00 -66.00 20170513 20170810
22 166.00 -62.00 20170524 20170821
22 -169.00 -70.00 20170601 20170829
22 -168.00 -70.00 20170601 20170829
22 -167.00 -70.00 20170601 20170829
22 -166.00 -70.00 20170601 20170829
22 -165.00 -70.00 20170601 20170829
22 -164.00 -70.00 20170601 20170829
22 -163.00 -70.00 20170601 20170829
22 -162.00 -70.00 20170601 20170829
22 174.00 -67.00 20170602 20170830
22 175.00 -67.00 20170602 20170830
22 176.00 -67.00 20170602 20170830
22 177.00 -67.00 20170602 20170830
22 178.00 -67.00 20170602 20170830
22 -173.00 -69.00 20170603 20170831
22 -172.00 -69.00 20170603 20170831
22 -171.00 -69.00 20170603 20170831
22 -170.00 -69.00 20170603 20170831
22 -169.00 -69.00 20170603 20170831
22 -168.00 -69.00 20170603 20170831
22 -167.00 -69.00 20170603 20170831
22 -166.00 -69.00 20170603 20170831
22 -165.00 -69.00 20170603 20170831
22 -164.00 -69.00 20170603 20170831
22 -163.00 -69.00 20170603 20170831
22 -177.00 -68.00 20170603 20170831
22 -176.00 -68.00 20170603 20170831
22 -175.00 -68.00 20170603 20170831
22 -174.00 -68.00 20170603 20170831
22 -173.00 -68.00 20170603 20170831
22 -172.00 -68.00 20170603 20170831
22 -171.00 -68.00 20170603 20170831
22 -170.00 -68.00 20170603 20170831
22 -169.00 -68.00 20170603 20170831
22 -168.00 -68.00 20170603 20170831
22 -167.00 -68.00 20170603 20170831
22 -166.00 -68.00 20170603 20170831
22 -180.00 -67.00 20170603 20170831
22 -179.00 -67.00 20170603 20170831
22 -178.00 -67.00 20170603 20170831
22 -177.00 -67.00 20170603 20170831
22 -176.00 -67.00 20170603 20170831
22 -175.00 -67.00 20170603 20170831
22 -174.00 -67.00 20170603 20170831
22 -173.00 -67.00 20170603 20170831
22 -172.00 -67.00 20170603 20170831
22 -171.00 -67.00 20170603 20170831
22 179.00 -67.00 20170603 20170831
22 -180.00 -66.00 20170603 20170831
22 -179.00 -66.00 20170603 20170831
22 -178.00 -66.00 20170603 20170831
22 -177.00 -66.00 20170603 20170831
22 -176.00 -66.00 20170603 20170831
22 -175.00 -66.00 20170603 20170831
22 -174.00 -66.00 20170603 20170831
22 -173.00 -66.00 20170603 20170831
22 -172.00 -66.00 20170603 20170831
22 -171.00 -66.00 20170603 20170831
22 176.00 -66.00 20170603 20170831
22 179.00 -66.00 20170603 20170831
22 -180.00 -65.00 20170603 20170831
22 -179.00 -65.00 20170603 20170831
22 -178.00 -65.00 20170603 20170831
22 -177.00 -65.00 20170603 20170831
22 -176.00 -65.00 20170603 20170831
22 -175.00 -65.00 20170603 20170831
22 -174.00 -65.00 20170603 20170831
22 -173.00 -65.00 20170603 20170831
22 179.00 -65.00 20170603 20170831
22 -165.00 -68.00 20170704 20171001
22 -164.00 -68.00 20170704 20171001

Patch 23 of 3734, Core period: 19820216-19820517
23 177.00 -68.00 19820127 19820426
23 175.00 -67.00 19820204 19820504
23 -174.00 -66.00 19820204 19820504
23 -173.00 -66.00 19820204 19820504
23 -172.00 -66.00 19820205 19820505
23 -171.00 -66.00 19820205 19820505
23 -170.00 -70.00 19820209 19820509
23 -169.00 -70.00 19820209 19820509
23 -168.00 -70.00 19820209 19820509
23 -167.00 -70.00 19820210 19820510
23 -166.00 -70.00 19820210 19820510
23 -180.00 -67.00 19820215 19820515
23 177.00 -67.00 19820215 19820515
23 178.00 -67.00 19820215 19820515
23 179.00 -67.00 19820215 19820515
23 176.00 -66.00 19820215 19820515
23 -172.00 -69.00 19820216 19820516
23 -171.00 -69.00 19820216 19820516
23 -170.00 -69.00 19820216 19820516
23 -177.00 -68.00 19820216 19820516
23 -176.00 -68.00 19820216 19820516
23 -175.00 -68.00 19820216 19820516
23 -174.00 -68.00 19820216 19820516
23 -173.00 -68.00 19820216 19820516
23 -179.00 -67.00 19820216 19820516
23 -178.00 -67.00 19820216 19820516
23 -177.00 -67.00 19820216 19820516
23 -176.00 -67.00 19820216 19820516
23 -175.00 -67.00 19820216 19820516
23 -174.00 -67.00 19820216 19820516
23 -173.00 -67.00 19820216 19820516
23 -172.00 -67.00 19820216 19820516
23 -175.00 -66.00 19820216 19820516
23 -172.00 -70.00 19820217 19820517
23 -174.00 -69.00 19820217 19820517
23 -173.00 -69.00 19820217 19820517
23 -172.00 -68.00 19820217 19820517
23 -171.00 -68.00 19820217 19820517
23 -173.00 -70.00 19820218 19820518
23 176.00 -67.00 19820219 19820519
23 173.00 -66.00 19820219 19820519
23 175.00 -66.00 19820219 19820519
23 174.00 -67.00 19820301 19820529
23 174.00 -66.00 19820301 19820529

Patch 24 of 3734, Core period: 19930412-19930711
24 -172.00 -65.00 19930409 19930707
24 -171.00 -65.00 19930409 19930707
24 -168.00 -63.00 19930409 19930707
24 -176.00 -65.00 19930410 19930708
24 -175.00 -65.00 19930410 19930708
24 -174.00 -65.00 19930410 19930708
24 -173.00 -65.00 19930410 19930708
24 -177.00 -64.00 19930410 19930708
24 -176.00 -64.00 19930410 19930708
24 -175.00 -64.00 19930410 19930708
24 -174.00 -64.00 19930410 19930708
24 -173.00 -64.00 19930410 19930708
24 -172.00 -64.00 19930410 19930708
24 -171.00 -64.00 19930410 19930708
24 -170.00 -64.00 19930410 19930708
24 -175.00 -63.00 19930410 19930708
24 -174.00 -63.00 19930410 19930708
24 -173.00 -63.00 19930410 19930708
24 -172.00 -63.00 19930410 19930708
24 -171.00 -63.00 19930410 19930708
24 -170.00 -63.00 19930410 19930708
24 -169.00 -63.00 19930410 19930708
24 170.00 -62.00 19930411 19930709
24 171.00 -62.00 19930411 19930709
24 172.00 -62.00 19930411 19930709
24 173.00 -62.00 19930411 19930709
24 174.00 -62.00 19930411 19930709
24 173.00 -61.00 19930411 19930709
24 174.00 -61.00 19930411 19930709
24 175.00 -61.00 19930411 19930709
24 175.00 -60.00 19930411 19930709
24 179.00 -64.00 19930412 19930710
24 -180.00 -63.00 19930412 19930710
24 -179.00 -63.00 19930412 19930710
24 -178.00 -63.00 19930412 19930710
24 -176.00 -63.00 19930412 19930710
24 175.00 -63.00 19930412 19930710
24 176.00 -63.00 19930412 19930710
24 177.00 -63.00 19930412 19930710
24 178.00 -63.00 19930412 19930710
24 179.00 -63.00 19930412 19930710
24 -180.00 -62.00 19930412 19930710
24 -179.00 -62.00 19930412 19930710
24 -178.00 -62.00 19930412 19930710
24 -177.00 -62.00 19930412 19930710
24 -176.00 -62.00 19930412 19930710
24 -175.00 -62.00 19930412 19930710
24 -174.00 -62.00 19930412 19930710
24 175.00 -62.00 19930412 19930710
24 176.00 -62.00 19930412 19930710
24 177.00 -62.00 19930412 19930710
24 178.00 -62.00 19930412 19930710
24 179.00 -62.00 19930412 19930710
24 -180.00 -61.00 19930412 19930710
24 -179.00 -61.00 19930412 19930710
24 -178.00 -61.00 19930412 19930710
24 -177.00 -61.00 19930412 19930710
24 -176.00 -61.00 19930412 19930710
24 -175.00 -61.00 19930412 19930710
24 -174.00 -61.00 19930412 19930710
24 -173.00 -61.00 19930412 19930710
24 168.00 -61.00 19930412 19930710
24 169.00 -61.00 19930412 19930710
24 170.00 -61.00 19930412 19930710
24 171.00 -61.00 19930412 19930710
24 176.00 -61.00 19930412 19930710
24 177.00 -61.00 19930412 19930710
24 178.00 -61.00 19930412 19930710
24 179.00 -61.00 19930412 19930710
24 167.00 -60.00 19930412 19930710
24 168.00 -60.00 19930412 19930710
24 169.00 -60.00 19930412 19930710
24 170.00 -60.00 19930412 19930710
24 172.00 -60.00 19930412 19930710
24 173.00 -60.00 19930412 19930710
24 174.00 -60.00 19930412 19930710
24 176.00 -60.00 19930412 19930710
24 177.00 -60.00 19930412 19930710
24 178.00 -60.00 19930412 19930710
24 179.00 -60.00 19930412 19930710
24 166.00 -59.00 19930412 19930710
24 167.00 -59.00 19930412 19930710
24 168.00 -59.00 19930412 19930710
24 169.00 -59.00 19930412 19930710
24 170.00 -59.00 19930412 19930710
24 171.00 -59.00 19930412 19930710
24 172.00 -59.00 19930412 19930710
24 173.00 -59.00 19930412 19930710
24 174.00 -59.00 19930412 19930710
24 166.00 -58.00 19930412 19930710
24 167.00 -58.00 19930412 19930710
24 168.00 -58.00 19930412 19930710
24 169.00 -58.00 19930412 19930710
24 170.00 -58.00 19930412 19930710
24 171.00 -58.00 19930412 19930710
24 168.00 -57.00 19930412 19930710
24 -180.00 -64.00 19930413 19930711
24 -179.00 -64.00 19930413 19930711
24 -178.00 -64.00 19930413 19930711
24 -177.00 -63.00 19930413 19930711
24 171.00 -63.00 19930413 19930711
24 172.00 -63.00 19930413 19930711
24 173.00 -63.00 19930413 19930711
24 174.00 -63.00 19930413 19930711
24 168.00 -62.00 19930413 19930711
24 169.00 -62.00 19930413 19930711
24 167.00 -61.00 19930413 19930711
24 165.00 -60.00 19930413 19930711
24 166.00 -60.00 19930413 19930711
24 164.00 -59.00 19930413 19930711
24 165.00 -59.00 19930413 19930711
24 167.00 -57.00 19930413 19930711
24 175.00 -59.00 19930414 19930712
24 172.00 -58.00 19930414 19930712
24 169.00 -57.00 19930414 19930712
24 172.00 -61.00 19930426 19930724
24 171.00 -60.00 19930426 19930724
24 168.00 -56.00 19930503 19930731
24 -180.00 -60.00 19930506 19930803

Patch 25 of 3734, Core period: 19990308-19990620
25 -162.00 -60.00 19990110 19990409
25 -163.00 -61.00 19990111 19990410
25 -162.00 -61.00 19990111 19990410
25 -161.00 -61.00 19990111 19990410
25 -172.00 -65.00 19990216 19990516
25 -171.00 -65.00 19990216 19990516
25 -170.00 -65.00 19990216 19990516
25 -169.00 -65.00 19990216 19990516
25 -168.00 -65.00 19990216 19990516
25 -167.00 -65.00 19990216 19990516
25 -166.00 -65.00 19990216 19990516
25 -165.00 -65.00 19990216 19990516
25 -164.00 -65.00 19990216 19990516
25 -157.00 -65.00 19990216 19990516
25 -156.00 -65.00 19990216 19990516
25 -170.00 -64.00 19990216 19990516
25 -169.00 -64.00 19990216 19990516
25 -168.00 -64.00 19990216 19990516
25 -167.00 -64.00 19990216 19990516
25 -166.00 -64.00 19990216 19990516
25 -165.00 -64.00 19990216 19990516
25 -164.00 -64.00 19990216 19990516
25 -163.00 -64.00 19990216 19990516
25 -157.00 -64.00 19990216 19990516
25 -156.00 -64.00 19990216 19990516
25 -162.00 -63.00 19990216 19990516
25 -161.00 -63.00 19990216 19990516
25 -160.00 -63.00 19990216 19990516
25 -163.00 -65.00 19990218 19990518
25 -162.00 -65.00 19990218 19990518
25 -161.00 -65.00 19990218 19990518
25 -160.00 -65.00 19990218 19990518
25 -159.00 -65.00 19990218 19990518
25 -158.00 -65.00 19990218 19990518
25 -162.00 -64.00 19990218 19990518
25 -161.00 -64.00 19990218 19990518
25 -160.00 -64.00 19990218 19990518
25 -159.00 -64.00 19990218 19990518
25 -158.00 -64.00 19990218 19990518
25 167.00 -63.00 19990301 19990529
25 166.00 -62.00 19990301 19990529
25 167.00 -62.00 19990301 19990529
25 168.00 -62.00 19990301 19990529
25 168.00 -64.00 19990304 19990601
25 169.00 -64.00 19990304 19990601
25 170.00 -64.00 19990304 19990601
25 171.00 -64.00 19990304 19990601
25 168.00 -63.00 19990304 19990601
25 169.00 -63.00 19990304 19990601
25 170.00 -63.00 19990306 19990603
25 176.00 -63.00 19990306 19990603
25 177.00 -63.00 19990306 19990603
25 178.00 -63.00 19990306 19990603
25 179.00 -63.00 19990306 19990603
25 -176.00 -64.00 19990307 19990604
25 -175.00 -64.00 19990307 19990604
25 -173.00 -64.00 19990307 19990604
25 -172.00 -64.00 19990307 19990604
25 -171.00 -64.00 19990307 19990604
25 172.00 -64.00 19990307 19990604
25 173.00 -64.00 19990307 19990604
25 174.00 -64.00 19990307 19990604
25 175.00 -64.00 19990307 19990604
25 176.00 -64.00 19990307 19990604
25 171.00 -63.00 19990307 19990604
25 172.00 -63.00 19990307 19990604
25 165.00 -62.00 19990307 19990604
25 177.00 -62.00 19990310 19990607
25 178.00 -62.00 19990310 19990607
25 -159.00 -63.00 19990312 19990609
25 -158.00 -63.00 19990313 19990610
25 -157.00 -63.00 19990313 19990610
25 168.00 -61.00 19990314 19990611
25 169.00 -61.00 19990314 19990611
25 170.00 -61.00 19990314 19990611
25 163.00 -60.00 19990314 19990611
25 164.00 -60.00 19990314 19990611
25 165.00 -60.00 19990314 19990611
25 166.00 -60.00 19990314 19990611
25 167.00 -60.00 19990314 19990611
25 168.00 -60.00 19990314 19990611
25 163.00 -59.00 19990314 19990611
25 164.00 -59.00 19990314 19990611
25 165.00 -59.00 19990314 19990611
25 166.00 -59.00 19990314 19990611
25 167.00 -59.00 19990314 19990611
25 177.00 -61.00 19990315 19990612
25 169.00 -60.00 19990315 19990612
25 -178.00 -59.00 19990315 19990612
25 -173.00 -56.00 19990315 19990612
25 -180.00 -61.00 19990316 19990613
25 178.00 -61.00 19990316 19990613
25 179.00 -61.00 19990316 19990613
25 -177.00 -59.00 19990317 19990614
25 -176.00 -59.00 19990317 19990614
25 -175.00 -59.00 19990317 19990614
25 -174.00 -59.00 19990317 19990614
25 -173.00 -59.00 19990317 19990614
25 -172.00 -59.00 19990317 19990614
25 -173.00 -57.00 19990317 19990614
25 -172.00 -61.00 19990318 19990615
25 -165.00 -61.00 19990318 19990615
25 -164.00 -61.00 19990318 19990615
25 -171.00 -60.00 19990318 19990615
25 -165.00 -60.00 19990318 19990615
25 -164.00 -60.00 19990318 19990615
25 -163.00 -60.00 19990318 19990615
25 -167.00 -59.00 19990318 19990615
25 -166.00 -59.00 19990318 19990615
25 -165.00 -59.00 19990318 19990615
25 -164.00 -59.00 19990318 19990615
25 -170.00 -58.00 19990318 19990615
25 -172.00 -57.00 19990318 19990615
25 -171.00 -57.00 19990318 19990615
25 -170.00 -57.00 19990318 19990615
25 -171.00 -56.00 19990318 19990615
25 -170.00 -56.00 19990318 19990615
25 -177.00 -62.00 19990319 19990616
25 -173.00 -62.00 19990319 19990616
25 -179.00 -61.00 19990319 19990616
25 -178.00 -61.00 19990319 19990616
25 -177.00 -61.00 19990319 19990616
25 -174.00 -61.00 19990319 19990616
25 -173.00 -61.00 19990319 19990616
25 -180.00 -60.00 19990319 19990616
25 -179.00 -60.00 19990319 19990616
25 -178.00 -60.00 19990319 19990616
25 -177.00 -60.00 19990319 19990616
25 -176.00 -60.00 19990319 19990616
25 -173.00 -60.00 19990319 19990616
25 -172.00 -60.00 19990319 19990616
25 179.00 -60.00 19990319 19990616
25 178.00 -59.00 19990319 19990616
25 179.00 -59.00 19990319 19990616
25 -180.00 -63.00 19990320 19990617
25 -179.00 -63.00 19990320 19990617
25 -178.00 -63.00 19990320 19990617
25 -177.00 -63.00 19990320 19990617
25 -176.00 -63.00 19990320 19990617
25 -175.00 -63.00 19990320 19990617
25 -174.00 -63.00 19990320 19990617
25 -180.00 -62.00 19990320 19990617
25 -176.00 -62.00 19990320 19990617
25 -175.00 -62.00 19990320 19990617
25 -174.00 -62.00 19990320 19990617
25 179.00 -62.00 19990320 19990617
25 -176.00 -61.00 19990320 19990617
25 -175.00 -61.00 19990320 19990617
25 173.00 -63.00 19990321 19990618
25 174.00 -63.00 19990321 19990618
25 175.00 -63.00 19990321 19990618
25 169.00 -62.00 19990321 19990618
25 170.00 -62.00 19990321 19990618
25 171.00 -62.00 19990321 19990618
25 173.00 -62.00 19990321 19990618
25 174.00 -62.00 19990321 19990618
25 175.00 -62.00 19990321 19990618
25 176.00 -62.00 19990321 19990618
25 164.00 -61.00 19990321 19990618
25 165.00 -61.00 19990321 19990618
25 166.00 -61.00 19990321 19990618
25 167.00 -61.00 19990321 19990618
25 174.00 -61.00 19990321 19990618
25 175.00 -61.00 19990321 19990618
25 176.00 -61.00 19990321 19990618
25 162.00 -60.00 19990321 19990618
25 177.00 -60.00 19990321 19990618
25 178.00 -60.00 19990321 19990618
25 -171.00 -59.00 19990321 19990618
25 -169.00 -56.00 19990321 19990618
25 -173.00 -63.00 19990322 19990619
25 -172.00 -63.00 19990322 19990619
25 -171.00 -63.00 19990322 19990619
25 -170.00 -63.00 19990322 19990619
25 -169.00 -63.00 19990322 19990619
25 -168.00 -63.00 19990322 19990619
25 -172.00 -62.00 19990322 19990619
25 -171.00 -62.00 19990322 19990619
25 -170.00 -62.00 19990322 19990619
25 -171.00 -61.00 19990322 19990619
25 -170.00 -61.00 19990322 19990619
25 -169.00 -61.00 19990322 19990619
25 -168.00 -61.00 19990322 19990619
25 -167.00 -61.00 19990322 19990619
25 -166.00 -61.00 19990322 19990619
25 -170.00 -60.00 19990322 19990619
25 -169.00 -60.00 19990322 19990619
25 -168.00 -60.00 19990322 19990619
25 -167.00 -60.00 19990322 19990619
25 -166.00 -60.00 19990322 19990619
25 -170.00 -59.00 19990322 19990619
25 -169.00 -59.00 19990322 19990619
25 -168.00 -59.00 19990322 19990619
25 -169.00 -58.00 19990322 19990619
25 -168.00 -58.00 19990322 19990619
25 -167.00 -58.00 19990322 19990619
25 -169.00 -57.00 19990322 19990619
25 -168.00 -57.00 19990322 19990619
25 161.00 -60.00 19990331 19990628
25 159.00 -59.00 19990405 19990703
25 160.00 -59.00 19990405 19990703
25 161.00 -59.00 19990405 19990703
25 162.00 -59.00 19990405 19990703
25 156.00 -58.00 19990405 19990703
25 157.00 -58.00 19990405 19990703
25 158.00 -58.00 19990405 19990703
25 159.00 -58.00 19990405 19990703
25 160.00 -58.00 19990405 19990703
25 161.00 -58.00 19990405 19990703
25 162.00 -58.00 19990405 19990703
25 155.00 -57.00 19990405 19990703
25 156.00 -57.00 19990405 19990703
25 157.00 -57.00 19990405 19990703
25 158.00 -57.00 19990405 19990703
25 174.00 -60.00 19990409 19990707
25 175.00 -60.00 19990409 19990707
25 176.00 -60.00 19990409 19990707
25 175.00 -59.00 19990409 19990707
25 176.00 -59.00 19990409 19990707
25 177.00 -59.00 19990409 19990707
25 160.00 -61.00 19990414 19990712
25 162.00 -61.00 19990414 19990712
25 163.00 -61.00 19990414 19990712
25 -173.00 -58.00 19990427 19990725
25 -172.00 -58.00 19990427 19990725
25 -171.00 -58.00 19990427 19990725
25 -175.00 -57.00 19990427 19990725
25 -174.00 -57.00 19990427 19990725
25 159.00 -61.00 19990428 19990726
25 160.00 -60.00 19990428 19990726
25 156.00 -59.00 19990428 19990726
25 -180.00 -58.00 19990509 19990806
25 -179.00 -58.00 19990509 19990806
25 -180.00 -57.00 19990513 19990810
25 178.00 -57.00 19990513 19990810
25 179.00 -57.00 19990513 19990810

Patch 26 of 3734, Core period: 19850803-19851031
26 176.00 -60.00 19850801 19851029
26 177.00 -60.00 19850801 19851029
26 -175.00 -63.00 19850802 19851030
26 -176.00 -62.00 19850802 19851030
26 -180.00 -61.00 19850802 19851030
26 -179.00 -61.00 19850802 19851030
26 -178.00 -61.00 19850802 19851030
26 178.00 -61.00 19850802 19851030
26 179.00 -61.00 19850802 19851030
26 -180.00 -60.00 19850802 19851030
26 178.00 -60.00 19850802 19851030
26 179.00 -60.00 19850802 19851030
26 -177.00 -61.00 19850804 19851101
26 -179.00 -60.00 19850804 19851101
26 -178.00 -60.00 19850804 19851101
26 -177.00 -60.00 19850804 19851101

Patch 27 of 3734, Core period: 20130427-20130726
27 -166.00 -56.00 20130302 20130530
27 -165.00 -56.00 20130302 20130530
27 -171.00 -57.00 20130425 20130723
27 -167.00 -60.00 20130426 20130724
27 -166.00 -60.00 20130426 20130724
27 -165.00 -60.00 20130426 20130724
27 -164.00 -60.00 20130426 20130724
27 -163.00 -60.00 20130426 20130724
27 -162.00 -60.00 20130426 20130724
27 176.00 -60.00 20130426 20130724
27 177.00 -60.00 20130426 20130724
27 178.00 -60.00 20130426 20130724
27 179.00 -60.00 20130426 20130724
27 -169.00 -59.00 20130426 20130724
27 -168.00 -59.00 20130426 20130724
27 -167.00 -59.00 20130426 20130724
27 -166.00 -59.00 20130426 20130724
27 -165.00 -59.00 20130426 20130724
27 -164.00 -59.00 20130426 20130724
27 -170.00 -58.00 20130426 20130724
27 -169.00 -58.00 20130426 20130724
27 -168.00 -58.00 20130426 20130724
27 -167.00 -58.00 20130426 20130724
27 -166.00 -58.00 20130426 20130724
27 -165.00 -58.00 20130426 20130724
27 -170.00 -57.00 20130426 20130724
27 -166.00 -57.00 20130426 20130724
27 -180.00 -61.00 20130427 20130725
27 -179.00 -61.00 20130427 20130725
27 -178.00 -61.00 20130427 20130725
27 -177.00 -61.00 20130427 20130725
27 -176.00 -61.00 20130427 20130725
27 -175.00 -61.00 20130427 20130725
27 -174.00 -61.00 20130427 20130725
27 -173.00 -61.00 20130427 20130725
27 -172.00 -61.00 20130427 20130725
27 -171.00 -61.00 20130427 20130725
27 -180.00 -60.00 20130427 20130725
27 -179.00 -60.00 20130427 20130725
27 -178.00 -60.00 20130427 20130725
27 -177.00 -60.00 20130427 20130725
27 -176.00 -60.00 20130427 20130725
27 -175.00 -60.00 20130427 20130725
27 -174.00 -60.00 20130427 20130725
27 -173.00 -60.00 20130427 20130725
27 -172.00 -60.00 20130427 20130725
27 -171.00 -60.00 20130427 20130725
27 -170.00 -60.00 20130427 20130725
27 -169.00 -60.00 20130427 20130725
27 -168.00 -60.00 20130427 20130725
27 -180.00 -59.00 20130427 20130725
27 -179.00 -59.00 20130427 20130725
27 -178.00 -59.00 20130427 20130725
27 -177.00 -59.00 20130427 20130725
27 -176.00 -59.00 20130427 20130725
27 -175.00 -59.00 20130427 20130725
27 -174.00 -59.00 20130427 20130725
27 -173.00 -59.00 20130427 20130725
27 -172.00 -59.00 20130427 20130725
27 -171.00 -59.00 20130427 20130725
27 -170.00 -59.00 20130427 20130725
27 178.00 -59.00 20130427 20130725
27 179.00 -59.00 20130427 20130725
27 -180.00 -58.00 20130427 20130725
27 -179.00 -58.00 20130427 20130725
27 -178.00 -58.00 20130427 20130725
27 -177.00 -58.00 20130427 20130725
27 -176.00 -58.00 20130427 20130725
27 -175.00 -58.00 20130427 20130725
27 -174.00 -58.00 20130427 20130725
27 -173.00 -58.00 20130427 20130725
27 -172.00 -58.00 20130427 20130725
27 -171.00 -58.00 20130427 20130725
27 -179.00 -57.00 20130427 20130725
27 -178.00 -57.00 20130427 20130725
27 -177.00 -57.00 20130427 20130725
27 -176.00 -57.00 20130427 20130725
27 -175.00 -57.00 20130427 20130725
27 -174.00 -57.00 20130427 20130725
27 -173.00 -57.00 20130427 20130725
27 -172.00 -57.00 20130427 20130725
27 -161.00 -60.00 20130429 20130727
27 -160.00 -60.00 20130429 20130727
27 -165.00 -57.00 20130430 20130728

Patch 28 of 3734, Core period: 19980122-19980608
28 -171.00 -57.00 19971215 19980314
28 -170.00 -57.00 19971215 19980314
28 -169.00 -57.00 19971215 19980314
28 -171.00 -56.00 19971215 19980314
28 -170.00 -56.00 19971215 19980314
28 -167.00 -57.00 19971223 19980322
28 -166.00 -57.00 19971223 19980322
28 -169.00 -56.00 19971223 19980322
28 -168.00 -56.00 19971223 19980322
28 -167.00 -56.00 19971223 19980322
28 -166.00 -56.00 19971223 19980322
28 -168.00 -57.00 19971227 19980326
28 -164.00 -57.00 19980106 19980405
28 -179.00 -60.00 19980110 19980409
28 -178.00 -60.00 19980110 19980409
28 -177.00 -60.00 19980110 19980409
28 -176.00 -60.00 19980110 19980409
28 175.00 -58.00 19980110 19980409
28 -168.00 -58.00 19980111 19980410
28 -165.00 -57.00 19980111 19980410
28 178.00 -60.00 19980113 19980412
28 176.00 -59.00 19980113 19980412
28 162.00 -54.00 19980113 19980412
28 166.00 -54.00 19980113 19980412
28 167.00 -54.00 19980113 19980412
28 159.00 -53.00 19980113 19980412
28 160.00 -53.00 19980113 19980412
28 161.00 -53.00 19980113 19980412
28 162.00 -53.00 19980113 19980412
28 163.00 -53.00 19980113 19980412
28 164.00 -53.00 19980113 19980412
28 165.00 -53.00 19980113 19980412
28 166.00 -53.00 19980113 19980412
28 167.00 -53.00 19980113 19980412
28 155.00 -52.00 19980113 19980412
28 159.00 -52.00 19980113 19980412
28 160.00 -52.00 19980113 19980412
28 161.00 -52.00 19980113 19980412
28 162.00 -52.00 19980113 19980412
28 163.00 -52.00 19980113 19980412
28 165.00 -52.00 19980113 19980412
28 166.00 -52.00 19980113 19980412
28 167.00 -52.00 19980113 19980412
28 -180.00 -60.00 19980114 19980413
28 179.00 -60.00 19980114 19980413
28 177.00 -59.00 19980114 19980413
28 178.00 -59.00 19980114 19980413
28 176.00 -58.00 19980114 19980413
28 177.00 -58.00 19980114 19980413
28 178.00 -58.00 19980114 19980413
28 -180.00 -57.00 19980114 19980413
28 176.00 -57.00 19980114 19980413
28 177.00 -57.00 19980114 19980413
28 178.00 -57.00 19980114 19980413
28 179.00 -57.00 19980114 19980413
28 -178.00 -58.00 19980118 19980417
28 -177.00 -58.00 19980118 19980417
28 -176.00 -58.00 19980118 19980417
28 -180.00 -59.00 19980120 19980419
28 -179.00 -59.00 19980120 19980419
28 -178.00 -59.00 19980120 19980419
28 -177.00 -59.00 19980120 19980419
28 -176.00 -59.00 19980120 19980419
28 -175.00 -59.00 19980120 19980419
28 179.00 -59.00 19980120 19980419
28 -180.00 -58.00 19980120 19980419
28 -179.00 -58.00 19980120 19980419
28 179.00 -58.00 19980120 19980419
28 179.00 -61.00 19980121 19980420
28 172.00 -60.00 19980121 19980420
28 173.00 -60.00 19980121 19980420
28 175.00 -60.00 19980121 19980420
28 176.00 -60.00 19980121 19980420
28 177.00 -60.00 19980121 19980420
28 168.00 -59.00 19980121 19980420
28 169.00 -59.00 19980121 19980420
28 171.00 -59.00 19980121 19980420
28 172.00 -59.00 19980121 19980420
28 173.00 -59.00 19980121 19980420
28 174.00 -59.00 19980121 19980420
28 175.00 -59.00 19980121 19980420
28 168.00 -58.00 19980121 19980420
28 169.00 -58.00 19980121 19980420
28 170.00 -58.00 19980121 19980420
28 171.00 -58.00 19980121 19980420
28 -180.00 -61.00 19980122 19980421
28 -179.00 -61.00 19980122 19980421
28 -178.00 -61.00 19980122 19980421
28 -177.00 -61.00 19980122 19980421
28 -176.00 -61.00 19980122 19980421
28 -175.00 -61.00 19980122 19980421
28 -174.00 -61.00 19980122 19980421
28 -175.00 -60.00 19980122 19980421
28 -174.00 -60.00 19980122 19980421
28 -173.00 -60.00 19980122 19980421
28 163.00 -55.00 19980122 19980421
28 160.00 -51.00 19980122 19980421
28 -176.00 -62.00 19980127 19980426
28 169.00 -57.00 19980128 19980427
28 170.00 -57.00 19980128 19980427
28 168.00 -56.00 19980128 19980427
28 168.00 -55.00 19980202 19980502
28 171.00 -57.00 19980203 19980503
28 170.00 -56.00 19980203 19980503
28 171.00 -56.00 19980203 19980503
28 172.00 -56.00 19980203 19980503
28 169.00 -55.00 19980203 19980503
28 170.00 -55.00 19980203 19980503
28 171.00 -55.00 19980203 19980503
28 172.00 -55.00 19980203 19980503
28 173.00 -55.00 19980203 19980503
28 168.00 -54.00 19980203 19980503
28 173.00 -54.00 19980203 19980503
28 172.00 -58.00 19980204 19980504
28 173.00 -58.00 19980204 19980504
28 174.00 -58.00 19980204 19980504
28 172.00 -57.00 19980204 19980504
28 173.00 -57.00 19980204 19980504
28 174.00 -57.00 19980204 19980504
28 175.00 -57.00 19980204 19980504
28 173.00 -56.00 19980204 19980504
28 174.00 -56.00 19980204 19980504
28 175.00 -56.00 19980204 19980504
28 176.00 -56.00 19980204 19980504
28 174.00 -55.00 19980204 19980504
28 175.00 -55.00 19980204 19980504
28 -164.00 -60.00 19980206 19980506
28 -166.00 -59.00 19980206 19980506
28 -165.00 -59.00 19980206 19980506
28 -164.00 -59.00 19980206 19980506
28 -167.00 -58.00 19980206 19980506
28 -166.00 -58.00 19980206 19980506
28 -165.00 -58.00 19980206 19980506
28 159.00 -49.00 19980206 19980506
28 -163.00 -60.00 19980207 19980507
28 169.00 -56.00 19980207 19980507
28 169.00 -54.00 19980207 19980507
28 170.00 -54.00 19980207 19980507
28 171.00 -54.00 19980207 19980507
28 172.00 -54.00 19980207 19980507
28 168.00 -53.00 19980207 19980507
28 169.00 -53.00 19980207 19980507
28 170.00 -53.00 19980207 19980507
28 171.00 -53.00 19980207 19980507
28 172.00 -53.00 19980207 19980507
28 164.00 -52.00 19980207 19980507
28 168.00 -52.00 19980207 19980507
28 161.00 -51.00 19980207 19980507
28 162.00 -51.00 19980207 19980507
28 163.00 -51.00 19980207 19980507
28 164.00 -51.00 19980207 19980507
28 159.00 -50.00 19980207 19980507
28 160.00 -50.00 19980207 19980507
28 161.00 -50.00 19980207 19980507
28 162.00 -50.00 19980207 19980507
28 163.00 -50.00 19980207 19980507
28 173.00 -53.00 19980214 19980514
28 -173.00 -61.00 19980217 19980517
28 -149.00 -66.00 19980219 19980519
28 -148.00 -66.00 19980219 19980519
28 -147.00 -66.00 19980219 19980519
28 -149.00 -65.00 19980219 19980519
28 -148.00 -65.00 19980219 19980519
28 -147.00 -65.00 19980219 19980519
28 -146.00 -65.00 19980219 19980519
28 161.00 -49.00 19980219 19980519
28 162.00 -49.00 19980219 19980519
28 160.00 -48.00 19980219 19980519
28 161.00 -48.00 19980219 19980519
28 159.00 -47.00 19980219 19980519
28 160.00 -47.00 19980219 19980519
28 159.00 -46.00 19980219 19980519
28 157.00 -53.00 19980220 19980520
28 156.00 -52.00 19980220 19980520
28 157.00 -52.00 19980220 19980520
28 158.00 -52.00 19980220 19980520
28 157.00 -51.00 19980220 19980520
28 -160.00 -65.00 19980221 19980521
28 -159.00 -65.00 19980221 19980521
28 -158.00 -65.00 19980221 19980521
28 -157.00 -65.00 19980221 19980521
28 -156.00 -65.00 19980221 19980521
28 -162.00 -64.00 19980221 19980521
28 -161.00 -64.00 19980221 19980521
28 -160.00 -64.00 19980221 19980521
28 -159.00 -64.00 19980221 19980521
28 -158.00 -64.00 19980221 19980521
28 -157.00 -64.00 19980221 19980521
28 -161.00 -63.00 19980221 19980521
28 -160.00 -63.00 19980221 19980521
28 -146.00 -67.00 19980222 19980522
28 -145.00 -67.00 19980223 19980523
28 -144.00 -67.00 19980223 19980523
28 -143.00 -67.00 19980223 19980523
28 -146.00 -66.00 19980223 19980523
28 -145.00 -66.00 19980223 19980523
28 -144.00 -66.00 19980223 19980523
28 -143.00 -66.00 19980223 19980523
28 -168.00 -64.00 19980227 19980527
28 -166.00 -65.00 19980228 19980528
28 -165.00 -65.00 19980228 19980528
28 -167.00 -64.00 19980228 19980528
28 -166.00 -64.00 19980228 19980528
28 -165.00 -64.00 19980228 19980528
28 -164.00 -64.00 19980228 19980528
28 -163.00 -66.00 19980301 19980529
28 -162.00 -66.00 19980301 19980529
28 -161.00 -66.00 19980301 19980529
28 -164.00 -65.00 19980301 19980529
28 -163.00 -65.00 19980301 19980529
28 -162.00 -65.00 19980301 19980529
28 -161.00 -65.00 19980301 19980529
28 -163.00 -64.00 19980301 19980529
28 -166.00 -63.00 19980303 19980531
28 -165.00 -63.00 19980304 19980601
28 -150.00 -66.00 19980306 19980603
28 -151.00 -65.00 19980306 19980603
28 -150.00 -65.00 19980306 19980603
28 -153.00 -61.00 19980307 19980604
28 -152.00 -61.00 19980307 19980604
28 -151.00 -64.00 19980308 19980605
28 -150.00 -64.00 19980308 19980605
28 -149.00 -64.00 19980308 19980605
28 -148.00 -64.00 19980308 19980605
28 -151.00 -63.00 19980308 19980605
28 -150.00 -63.00 19980308 19980605
28 -149.00 -63.00 19980308 19980605
28 -159.00 -63.00 19980310 19980607
28 -158.00 -63.00 19980310 19980607
28 -157.00 -63.00 19980310 19980607
28 -161.00 -62.00 19980310 19980607
28 -160.00 -62.00 19980310 19980607
28 -159.00 -62.00 19980310 19980607
28 -158.00 -62.00 19980310 19980607
28 -157.00 -62.00 19980310 19980607
28 -163.00 -61.00 19980310 19980607
28 -162.00 -61.00 19980310 19980607
28 -161.00 -61.00 19980310 19980607
28 -156.00 -61.00 19980310 19980607
28 -155.00 -61.00 19980310 19980607
28 -154.00 -61.00 19980310 19980607
28 -155.00 -65.00 19980313 19980610
28 -154.00 -65.00 19980313 19980610
28 -153.00 -65.00 19980313 19980610
28 -152.00 -65.00 19980313 19980610
28 -156.00 -64.00 19980313 19980610
28 -155.00 -64.00 19980313 19980610
28 -154.00 -64.00 19980313 19980610
28 -153.00 -64.00 19980313 19980610
28 -152.00 -64.00 19980313 19980610
28 -156.00 -63.00 19980314 19980611
28 -155.00 -63.00 19980314 19980611
28 -154.00 -63.00 19980314 19980611
28 -153.00 -63.00 19980314 19980611
28 -152.00 -63.00 19980314 19980611
28 -148.00 -63.00 19980314 19980611
28 -156.00 -62.00 19980314 19980611
28 -155.00 -62.00 19980314 19980611
28 -154.00 -62.00 19980314 19980611
28 -153.00 -62.00 19980314 19980611
28 -152.00 -62.00 19980314 19980611
28 -151.00 -62.00 19980314 19980611
28 -150.00 -62.00 19980314 19980611
28 -151.00 -61.00 19980314 19980611
28 -169.00 -63.00 19980316 19980613
28 -168.00 -63.00 19980316 19980613
28 -167.00 -63.00 19980316 19980613
28 -172.00 -62.00 19980316 19980613
28 -171.00 -62.00 19980316 19980613
28 -170.00 -62.00 19980316 19980613
28 -169.00 -62.00 19980316 19980613
28 -168.00 -62.00 19980316 19980613
28 -167.00 -62.00 19980316 19980613
28 -166.00 -62.00 19980316 19980613
28 -171.00 -61.00 19980316 19980613
28 -170.00 -61.00 19980316 19980613
28 -169.00 -61.00 19980316 19980613
28 167.00 -61.00 19980320 19980617
28 163.00 -60.00 19980320 19980617
28 161.00 -58.00 19980320 19980617
28 -170.00 -63.00 19980322 19980619
28 163.00 -58.00 19980322 19980619
28 164.00 -60.00 19980323 19980620
28 165.00 -60.00 19980323 19980620
28 166.00 -60.00 19980323 19980620
28 167.00 -60.00 19980323 19980620
28 162.00 -59.00 19980323 19980620
28 163.00 -59.00 19980323 19980620
28 164.00 -59.00 19980323 19980620
28 165.00 -59.00 19980323 19980620
28 166.00 -59.00 19980323 19980620
28 167.00 -59.00 19980323 19980620
28 162.00 -58.00 19980323 19980620
28 168.00 -61.00 19980326 19980623
28 169.00 -61.00 19980326 19980623
28 168.00 -60.00 19980326 19980623
28 169.00 -60.00 19980326 19980623
28 -168.00 -61.00 19980404 19980702
28 -164.00 -63.00 19980405 19980703
28 -163.00 -63.00 19980405 19980703
28 -162.00 -63.00 19980405 19980703
28 -165.00 -62.00 19980405 19980703
28 -164.00 -62.00 19980405 19980703
28 -163.00 -62.00 19980405 19980703
28 -162.00 -62.00 19980405 19980703
28 -165.00 -61.00 19980405 19980703
28 -164.00 -61.00 19980405 19980703
28 -167.00 -61.00 19980406 19980704
28 -166.00 -61.00 19980406 19980704
28 -171.00 -60.00 19980509 19980806

Patch 29 of 3734, Core period: 20160213-20160516
29 -180.00 -60.00 20160129 20160427
29 179.00 -60.00 20160129 20160427
29 -180.00 -59.00 20160129 20160427
29 177.00 -59.00 20160129 20160427
29 178.00 -59.00 20160129 20160427
29 179.00 -59.00 20160129 20160427
29 -179.00 -61.00 20160201 20160430
29 178.00 -60.00 20160201 20160430
29 -178.00 -61.00 20160212 20160511
29 -179.00 -60.00 20160212 20160511
29 -176.00 -62.00 20160213 20160512
29 -175.00 -62.00 20160213 20160512
29 -177.00 -61.00 20160213 20160512
29 -176.00 -61.00 20160213 20160512
29 -175.00 -61.00 20160213 20160512
29 -178.00 -60.00 20160213 20160512
29 -177.00 -60.00 20160213 20160512
29 -176.00 -60.00 20160213 20160512
29 -179.00 -59.00 20160213 20160512
29 -178.00 -59.00 20160213 20160512
29 -177.00 -59.00 20160213 20160512
29 -178.00 -58.00 20160213 20160512
29 -177.00 -58.00 20160213 20160512
29 -173.00 -60.00 20160216 20160515
29 -176.00 -59.00 20160216 20160515
29 -175.00 -59.00 20160216 20160515
29 -174.00 -59.00 20160216 20160515
29 -173.00 -59.00 20160216 20160515
29 -176.00 -58.00 20160216 20160515
29 -175.00 -58.00 20160216 20160515
29 -174.00 -61.00 20160217 20160516
29 -173.00 -61.00 20160217 20160516
29 -175.00 -60.00 20160217 20160516
29 -174.00 -60.00 20160217 20160516

Patch 30 of 3734, Core period: 20100314-20100617
30 -180.00 -60.00 20100211 20100511
30 -179.00 -60.00 20100211 20100511
30 -178.00 -60.00 20100211 20100511
30 -177.00 -60.00 20100211 20100511
30 -176.00 -60.00 20100211 20100511
30 179.00 -60.00 20100211 20100511
30 -180.00 -59.00 20100211 20100511
30 -179.00 -59.00 20100211 20100511
30 179.00 -59.00 20100211 20100511
30 -167.00 -64.00 20100313 20100610
30 -174.00 -61.00 20100313 20100610
30 -173.00 -61.00 20100313 20100610
30 -172.00 -61.00 20100313 20100610
30 -171.00 -61.00 20100313 20100610
30 -166.00 -64.00 20100314 20100611
30 -179.00 -61.00 20100317 20100614
30 -178.00 -61.00 20100317 20100614
30 -177.00 -61.00 20100317 20100614
30 -176.00 -61.00 20100317 20100614
30 -171.00 -64.00 20100319 20100616
30 -170.00 -64.00 20100319 20100616
30 -175.00 -63.00 20100319 20100616
30 -174.00 -63.00 20100319 20100616
30 -173.00 -63.00 20100319 20100616
30 -172.00 -63.00 20100319 20100616
30 -171.00 -63.00 20100319 20100616
30 -170.00 -63.00 20100319 20100616
30 -177.00 -62.00 20100319 20100616
30 -176.00 -62.00 20100319 20100616
30 -175.00 -62.00 20100319 20100616
30 -174.00 -62.00 20100319 20100616
30 -173.00 -62.00 20100319 20100616
30 -172.00 -62.00 20100319 20100616
30 -171.00 -62.00 20100319 20100616
30 -170.00 -62.00 20100319 20100616
30 -169.00 -62.00 20100319 20100616
30 -175.00 -61.00 20100319 20100616
30 -170.00 -61.00 20100319 20100616
30 -169.00 -63.00 20100321 20100618
30 -168.00 -63.00 20100321 20100618
30 -179.00 -63.00 20100322 20100619
30 -178.00 -63.00 20100322 20100619
30 -178.00 -62.00 20100322 20100619
30 -177.00 -64.00 20100324 20100621
30 -176.00 -64.00 20100324 20100621
30 -172.00 -64.00 20100324 20100621
30 -177.00 -63.00 20100324 20100621
30 -176.00 -63.00 20100324 20100621
30 -169.00 -61.00 20100324 20100621

Patch 31 of 3734, Core period: 20050212-20050518
31 -168.00 -59.00 20050112 20050411
31 -167.00 -59.00 20050122 20050421
31 -166.00 -59.00 20050122 20050421
31 -166.00 -61.00 20050211 20050511
31 -167.00 -60.00 20050211 20050511
31 -165.00 -60.00 20050211 20050511
31 -177.00 -59.00 20050211 20050511
31 -176.00 -59.00 20050211 20050511
31 -175.00 -59.00 20050211 20050511
31 -174.00 -59.00 20050211 20050511
31 -173.00 -59.00 20050211 20050511
31 -172.00 -59.00 20050211 20050511
31 -171.00 -59.00 20050211 20050511
31 -170.00 -59.00 20050211 20050511
31 -169.00 -59.00 20050211 20050511
31 -179.00 -58.00 20050211 20050511
31 -176.00 -58.00 20050211 20050511
31 -175.00 -58.00 20050211 20050511
31 -174.00 -58.00 20050211 20050511
31 -173.00 -58.00 20050211 20050511
31 -172.00 -58.00 20050211 20050511
31 -171.00 -58.00 20050211 20050511
31 -170.00 -58.00 20050211 20050511
31 -172.00 -62.00 20050212 20050512
31 -171.00 -62.00 20050212 20050512
31 -170.00 -62.00 20050212 20050512
31 -175.00 -61.00 20050212 20050512
31 -174.00 -61.00 20050212 20050512
31 -173.00 -61.00 20050212 20050512
31 -172.00 -61.00 20050212 20050512
31 -171.00 -61.00 20050212 20050512
31 -170.00 -61.00 20050212 20050512
31 -169.00 -61.00 20050212 20050512
31 -168.00 -61.00 20050212 20050512
31 -167.00 -61.00 20050212 20050512
31 -178.00 -60.00 20050212 20050512
31 -177.00 -60.00 20050212 20050512
31 -176.00 -60.00 20050212 20050512
31 -175.00 -60.00 20050212 20050512
31 -174.00 -60.00 20050212 20050512
31 -173.00 -60.00 20050212 20050512
31 -172.00 -60.00 20050212 20050512
31 -171.00 -60.00 20050212 20050512
31 -170.00 -60.00 20050212 20050512
31 -169.00 -60.00 20050212 20050512
31 -168.00 -60.00 20050212 20050512
31 -178.00 -61.00 20050214 20050514
31 -177.00 -61.00 20050214 20050514
31 -180.00 -60.00 20050214 20050514
31 -179.00 -60.00 20050214 20050514
31 179.00 -60.00 20050214 20050514
31 -180.00 -59.00 20050214 20050514
31 177.00 -59.00 20050214 20050514
31 -171.00 -64.00 20050217 20050517
31 -170.00 -64.00 20050217 20050517
31 -169.00 -64.00 20050217 20050517
31 -173.00 -63.00 20050217 20050517
31 -172.00 -63.00 20050217 20050517
31 -171.00 -63.00 20050217 20050517
31 -170.00 -63.00 20050217 20050517
31 -169.00 -63.00 20050217 20050517
31 -173.00 -62.00 20050217 20050517
31 -166.00 -60.00 20050217 20050517
31 -169.00 -58.00 20050217 20050517
31 -175.00 -63.00 20050221 20050521
31 -174.00 -63.00 20050221 20050521
31 -176.00 -64.00 20050223 20050523
31 -175.00 -64.00 20050223 20050523
31 -173.00 -64.00 20050223 20050523
31 -172.00 -64.00 20050223 20050523
31 -165.00 -61.00 20050223 20050523
31 -164.00 -61.00 20050223 20050523
31 -163.00 -61.00 20050223 20050523
31 -164.00 -60.00 20050223 20050523
31 177.00 -60.00 20050305 20050602
31 178.00 -60.00 20050305 20050602
31 178.00 -59.00 20050305 20050602
31 179.00 -59.00 20050305 20050602

Patch 32 of 3734, Core period: 20070209-20070609
32 -178.00 -59.00 20070114 20070413
32 -177.00 -59.00 20070114 20070413
32 -179.00 -61.00 20070207 20070507
32 -178.00 -61.00 20070207 20070507
32 -177.00 -60.00 20070208 20070508
32 -180.00 -60.00 20070215 20070515
32 -179.00 -60.00 20070215 20070515
32 -178.00 -60.00 20070215 20070515
32 178.00 -60.00 20070215 20070515
32 179.00 -60.00 20070215 20070515
32 -176.00 -59.00 20070311 20070608
32 178.00 -59.00 20070311 20070608
32 179.00 -59.00 20070311 20070608
32 -178.00 -58.00 20070311 20070608
32 -175.00 -59.00 20070312 20070609
32 -174.00 -59.00 20070312 20070609
32 -177.00 -58.00 20070312 20070609
32 -176.00 -58.00 20070312 20070609

Patch 33 of 3734, Core period: 19830216-19830522
33 -176.00 -59.00 19830215 19830515
33 -175.00 -59.00 19830215 19830515
33 -174.00 -59.00 19830215 19830515
33 -173.00 -59.00 19830215 19830515
33 -178.00 -58.00 19830215 19830515
33 -177.00 -58.00 19830215 19830515
33 -180.00 -60.00 19830221 19830521
33 -179.00 -60.00 19830221 19830521
33 -178.00 -60.00 19830221 19830521
33 -177.00 -60.00 19830221 19830521
33 -176.00 -60.00 19830221 19830521
33 -175.00 -60.00 19830221 19830521
33 -180.00 -59.00 19830221 19830521
33 -179.00 -59.00 19830221 19830521
33 -178.00 -59.00 19830221 19830521
33 -177.00 -59.00 19830221 19830521
33 179.00 -59.00 19830221 19830521
33 -179.00 -58.00 19830225 19830525

Patch 34 of 3734, Core period: 19870316-19870622
34 167.00 -49.00 19870109 19870408
34 169.00 -52.00 19870112 19870411
34 168.00 -52.00 19870113 19870412
34 167.00 -51.00 19870113 19870412
34 168.00 -51.00 19870113 19870412
34 167.00 -50.00 19870113 19870412
34 168.00 -50.00 19870113 19870412
34 169.00 -53.00 19870114 19870413
34 170.00 -53.00 19870114 19870413
34 171.00 -53.00 19870114 19870413
34 170.00 -52.00 19870114 19870413
34 171.00 -52.00 19870114 19870413
34 172.00 -52.00 19870114 19870413
34 169.00 -51.00 19870114 19870413
34 170.00 -51.00 19870114 19870413
34 168.00 -65.00 19870223 19870523
34 164.00 -63.00 19870223 19870523
34 166.00 -64.00 19870228 19870528
34 167.00 -64.00 19870302 19870530
34 168.00 -64.00 19870302 19870530
34 173.00 -64.00 19870302 19870530
34 174.00 -64.00 19870302 19870530
34 165.00 -63.00 19870302 19870530
34 166.00 -63.00 19870302 19870530
34 167.00 -63.00 19870302 19870530
34 169.00 -63.00 19870302 19870530
34 170.00 -63.00 19870302 19870530
34 171.00 -63.00 19870302 19870530
34 165.00 -62.00 19870302 19870530
34 166.00 -62.00 19870302 19870530
34 163.00 -61.00 19870302 19870530
34 161.00 -60.00 19870302 19870530
34 174.00 -66.00 19870304 19870601
34 175.00 -66.00 19870304 19870601
34 176.00 -66.00 19870304 19870601
34 174.00 -65.00 19870304 19870601
34 175.00 -65.00 19870304 19870601
34 -109.00 -65.00 19870305 19870602
34 -108.00 -65.00 19870305 19870602
34 -107.00 -65.00 19870305 19870602
34 -106.00 -65.00 19870305 19870602
34 -105.00 -65.00 19870305 19870602
34 -104.00 -65.00 19870305 19870602
34 -103.00 -65.00 19870305 19870602
34 -111.00 -64.00 19870305 19870602
34 -110.00 -64.00 19870305 19870602
34 -109.00 -64.00 19870305 19870602
34 -108.00 -64.00 19870305 19870602
34 -107.00 -64.00 19870305 19870602
34 -106.00 -64.00 19870305 19870602
34 -105.00 -64.00 19870305 19870602
34 -104.00 -64.00 19870305 19870602
34 -103.00 -64.00 19870305 19870602
34 -102.00 -64.00 19870305 19870602
34 169.00 -64.00 19870305 19870602
34 170.00 -64.00 19870305 19870602
34 171.00 -64.00 19870305 19870602
34 172.00 -64.00 19870305 19870602
34 -115.00 -63.00 19870305 19870602
34 -114.00 -63.00 19870305 19870602
34 -113.00 -63.00 19870305 19870602
34 -112.00 -63.00 19870305 19870602
34 -111.00 -63.00 19870305 19870602
34 -110.00 -63.00 19870305 19870602
34 -109.00 -63.00 19870305 19870602
34 -107.00 -63.00 19870305 19870602
34 -106.00 -63.00 19870305 19870602
34 -101.00 -63.00 19870305 19870602
34 -100.00 -63.00 19870305 19870602
34 168.00 -63.00 19870305 19870602
34 -116.00 -62.00 19870305 19870602
34 -115.00 -62.00 19870305 19870602
34 -119.00 -61.00 19870305 19870602
34 -118.00 -61.00 19870305 19870602
34 -117.00 -61.00 19870305 19870602
34 -116.00 -61.00 19870305 19870602
34 -115.00 -61.00 19870305 19870602
34 -114.00 -61.00 19870305 19870602
34 -120.00 -60.00 19870305 19870602
34 -118.00 -60.00 19870305 19870602
34 -117.00 -60.00 19870305 19870602
34 -116.00 -60.00 19870305 19870602
34 -124.00 -59.00 19870305 19870602
34 -104.00 -67.00 19870306 19870603
34 -104.00 -66.00 19870306 19870603
34 -103.00 -66.00 19870306 19870603
34 -102.00 -66.00 19870306 19870603
34 -101.00 -66.00 19870306 19870603
34 -100.00 -66.00 19870306 19870603
34 -99.00 -66.00 19870306 19870603
34 -102.00 -65.00 19870306 19870603
34 -101.00 -65.00 19870306 19870603
34 -100.00 -65.00 19870306 19870603
34 -99.00 -65.00 19870306 19870603
34 -98.00 -65.00 19870306 19870603
34 -97.00 -65.00 19870306 19870603
34 -96.00 -65.00 19870306 19870603
34 -101.00 -64.00 19870306 19870603
34 -100.00 -64.00 19870306 19870603
34 -99.00 -64.00 19870306 19870603
34 -98.00 -64.00 19870306 19870603
34 -97.00 -64.00 19870306 19870603
34 -114.00 -62.00 19870306 19870603
34 -113.00 -62.00 19870306 19870603
34 -112.00 -62.00 19870306 19870603
34 -111.00 -62.00 19870306 19870603
34 -110.00 -62.00 19870306 19870603
34 -109.00 -62.00 19870306 19870603
34 -113.00 -61.00 19870306 19870603
34 -112.00 -61.00 19870306 19870603
34 -111.00 -61.00 19870306 19870603
34 -115.00 -60.00 19870306 19870603
34 -114.00 -60.00 19870306 19870603
34 -113.00 -60.00 19870306 19870603
34 173.00 -54.00 19870307 19870604
34 172.00 -53.00 19870307 19870604
34 -99.00 -63.00 19870308 19870605
34 -102.00 -62.00 19870308 19870605
34 -103.00 -62.00 19870309 19870606
34 -104.00 -61.00 19870309 19870606
34 -103.00 -61.00 19870309 19870606
34 164.00 -61.00 19870309 19870606
34 165.00 -61.00 19870309 19870606
34 166.00 -61.00 19870309 19870606
34 162.00 -60.00 19870309 19870606
34 -102.00 -63.00 19870310 19870607
34 -128.00 -58.00 19870311 19870608
34 -127.00 -58.00 19870311 19870608
34 -130.00 -57.00 19870311 19870608
34 -103.00 -67.00 19870313 19870610
34 -163.00 -63.00 19870314 19870611
34 -162.00 -63.00 19870314 19870611
34 -161.00 -63.00 19870314 19870611
34 -163.00 -62.00 19870314 19870611
34 167.00 -62.00 19870315 19870612
34 168.00 -62.00 19870315 19870612
34 169.00 -62.00 19870315 19870612
34 170.00 -62.00 19870315 19870612
34 171.00 -62.00 19870315 19870612
34 173.00 -62.00 19870315 19870612
34 174.00 -62.00 19870315 19870612
34 170.00 -61.00 19870315 19870612
34 171.00 -61.00 19870315 19870612
34 -147.00 -57.00 19870315 19870612
34 -146.00 -57.00 19870315 19870612
34 -143.00 -57.00 19870315 19870612
34 -148.00 -56.00 19870315 19870612
34 -147.00 -56.00 19870315 19870612
34 -145.00 -56.00 19870315 19870612
34 -144.00 -56.00 19870315 19870612
34 -143.00 -56.00 19870315 19870612
34 -142.00 -56.00 19870315 19870612
34 -149.00 -55.00 19870315 19870612
34 -148.00 -55.00 19870315 19870612
34 -147.00 -55.00 19870315 19870612
34 -146.00 -55.00 19870315 19870612
34 -152.00 -54.00 19870315 19870612
34 -151.00 -54.00 19870315 19870612
34 -150.00 -54.00 19870315 19870612
34 -149.00 -54.00 19870315 19870612
34 -148.00 -54.00 19870315 19870612
34 -152.00 -53.00 19870315 19870612
34 -151.00 -53.00 19870315 19870612
34 -150.00 -53.00 19870315 19870612
34 -149.00 -53.00 19870315 19870612
34 -102.00 -67.00 19870316 19870613
34 -117.00 -63.00 19870316 19870613
34 -116.00 -63.00 19870316 19870613
34 -118.00 -62.00 19870316 19870613
34 -117.00 -62.00 19870316 19870613
34 175.00 -62.00 19870316 19870613
34 -122.00 -61.00 19870316 19870613
34 -121.00 -61.00 19870316 19870613
34 -120.00 -61.00 19870316 19870613
34 -123.00 -60.00 19870316 19870613
34 -122.00 -60.00 19870316 19870613
34 -121.00 -60.00 19870316 19870613
34 -140.00 -59.00 19870316 19870613
34 -139.00 -59.00 19870316 19870613
34 -138.00 -59.00 19870316 19870613
34 -137.00 -59.00 19870316 19870613
34 -136.00 -59.00 19870316 19870613
34 -126.00 -59.00 19870316 19870613
34 -125.00 -59.00 19870316 19870613
34 -144.00 -58.00 19870316 19870613
34 -143.00 -58.00 19870316 19870613
34 -142.00 -58.00 19870316 19870613
34 -141.00 -58.00 19870316 19870613
34 -140.00 -58.00 19870316 19870613
34 -139.00 -58.00 19870316 19870613
34 -138.00 -58.00 19870316 19870613
34 -137.00 -58.00 19870316 19870613
34 -136.00 -58.00 19870316 19870613
34 -133.00 -58.00 19870316 19870613
34 -132.00 -58.00 19870316 19870613
34 -131.00 -58.00 19870316 19870613
34 -130.00 -58.00 19870316 19870613
34 -129.00 -58.00 19870316 19870613
34 -145.00 -57.00 19870316 19870613
34 -144.00 -57.00 19870316 19870613
34 -142.00 -57.00 19870316 19870613
34 -141.00 -57.00 19870316 19870613
34 -140.00 -57.00 19870316 19870613
34 -135.00 -57.00 19870316 19870613
34 -134.00 -57.00 19870316 19870613
34 -133.00 -57.00 19870316 19870613
34 -132.00 -57.00 19870316 19870613
34 -131.00 -57.00 19870316 19870613
34 -146.00 -56.00 19870316 19870613
34 -135.00 -56.00 19870316 19870613
34 -145.00 -55.00 19870316 19870613
34 -162.00 -62.00 19870317 19870614
34 -165.00 -61.00 19870317 19870614
34 -164.00 -61.00 19870317 19870614
34 -163.00 -61.00 19870317 19870614
34 -164.00 -60.00 19870317 19870614
34 -168.00 -59.00 19870317 19870614
34 -167.00 -59.00 19870317 19870614
34 -166.00 -59.00 19870317 19870614
34 -165.00 -59.00 19870317 19870614
34 -164.00 -59.00 19870317 19870614
34 157.00 -57.00 19870317 19870614
34 158.00 -57.00 19870317 19870614
34 159.00 -57.00 19870317 19870614
34 -134.00 -56.00 19870317 19870614
34 159.00 -52.00 19870317 19870614
34 160.00 -52.00 19870317 19870614
34 161.00 -52.00 19870317 19870614
34 167.00 -61.00 19870318 19870615
34 168.00 -61.00 19870318 19870615
34 169.00 -61.00 19870318 19870615
34 173.00 -61.00 19870318 19870615
34 174.00 -61.00 19870318 19870615
34 165.00 -60.00 19870318 19870615
34 166.00 -60.00 19870318 19870615
34 167.00 -60.00 19870318 19870615
34 158.00 -58.00 19870318 19870615
34 159.00 -58.00 19870318 19870615
34 160.00 -58.00 19870318 19870615
34 156.00 -57.00 19870318 19870615
34 158.00 -56.00 19870318 19870615
34 161.00 -53.00 19870318 19870615
34 163.00 -60.00 19870319 19870616
34 164.00 -60.00 19870319 19870616
34 168.00 -60.00 19870319 19870616
34 169.00 -60.00 19870319 19870616
34 170.00 -60.00 19870319 19870616
34 171.00 -60.00 19870319 19870616
34 172.00 -60.00 19870319 19870616
34 162.00 -59.00 19870319 19870616
34 164.00 -59.00 19870319 19870616
34 165.00 -59.00 19870319 19870616
34 166.00 -59.00 19870319 19870616
34 167.00 -59.00 19870319 19870616
34 168.00 -59.00 19870319 19870616
34 169.00 -59.00 19870319 19870616
34 170.00 -59.00 19870319 19870616
34 -168.00 -58.00 19870319 19870616
34 -167.00 -58.00 19870319 19870616
34 161.00 -58.00 19870319 19870616
34 162.00 -58.00 19870319 19870616
34 163.00 -58.00 19870319 19870616
34 164.00 -58.00 19870319 19870616
34 165.00 -58.00 19870319 19870616
34 166.00 -58.00 19870319 19870616
34 167.00 -58.00 19870319 19870616
34 168.00 -58.00 19870319 19870616
34 169.00 -58.00 19870319 19870616
34 170.00 -58.00 19870319 19870616
34 160.00 -57.00 19870319 19870616
34 161.00 -57.00 19870319 19870616
34 162.00 -57.00 19870319 19870616
34 163.00 -57.00 19870319 19870616
34 164.00 -57.00 19870319 19870616
34 165.00 -57.00 19870319 19870616
34 166.00 -57.00 19870319 19870616
34 167.00 -57.00 19870319 19870616
34 159.00 -56.00 19870319 19870616
34 160.00 -56.00 19870319 19870616
34 161.00 -56.00 19870319 19870616
34 162.00 -56.00 19870319 19870616
34 163.00 -56.00 19870319 19870616
34 164.00 -56.00 19870319 19870616
34 165.00 -56.00 19870319 19870616
34 167.00 -56.00 19870319 19870616
34 162.00 -55.00 19870319 19870616
34 163.00 -55.00 19870319 19870616
34 164.00 -55.00 19870319 19870616
34 165.00 -55.00 19870319 19870616
34 162.00 -54.00 19870319 19870616
34 163.00 -54.00 19870319 19870616
34 164.00 -54.00 19870319 19870616
34 160.00 -53.00 19870319 19870616
34 162.00 -53.00 19870319 19870616
34 163.00 -53.00 19870319 19870616
34 173.00 -60.00 19870320 19870617
34 171.00 -59.00 19870320 19870617
34 -170.00 -58.00 19870320 19870617
34 -169.00 -58.00 19870320 19870617
34 -179.00 -57.00 19870320 19870617
34 168.00 -56.00 19870320 19870617
34 165.00 -54.00 19870320 19870617
34 166.00 -54.00 19870320 19870617
34 -159.00 -63.00 19870321 19870618
34 -178.00 -60.00 19870321 19870618
34 -177.00 -60.00 19870321 19870618
34 -180.00 -59.00 19870321 19870618
34 -179.00 -59.00 19870321 19870618
34 -178.00 -59.00 19870321 19870618
34 -177.00 -59.00 19870321 19870618
34 -176.00 -59.00 19870321 19870618
34 -175.00 -59.00 19870321 19870618
34 -174.00 -59.00 19870321 19870618
34 -180.00 -58.00 19870321 19870618
34 -179.00 -58.00 19870321 19870618
34 -178.00 -58.00 19870321 19870618
34 -177.00 -58.00 19870321 19870618
34 -171.00 -58.00 19870321 19870618
34 177.00 -58.00 19870321 19870618
34 178.00 -58.00 19870321 19870618
34 179.00 -58.00 19870321 19870618
34 -180.00 -57.00 19870321 19870618
34 176.00 -57.00 19870321 19870618
34 177.00 -57.00 19870321 19870618
34 178.00 -57.00 19870321 19870618
34 179.00 -57.00 19870321 19870618
34 -180.00 -56.00 19870321 19870618
34 175.00 -56.00 19870321 19870618
34 176.00 -56.00 19870321 19870618
34 177.00 -56.00 19870321 19870618
34 178.00 -56.00 19870321 19870618
34 179.00 -56.00 19870321 19870618
34 172.00 -55.00 19870321 19870618
34 173.00 -55.00 19870321 19870618
34 174.00 -55.00 19870321 19870618
34 178.00 -55.00 19870321 19870618
34 170.00 -54.00 19870321 19870618
34 171.00 -54.00 19870321 19870618
34 172.00 -54.00 19870321 19870618
34 174.00 -54.00 19870321 19870618
34 175.00 -54.00 19870321 19870618
34 173.00 -53.00 19870321 19870618
34 167.00 -52.00 19870321 19870618
34 -160.00 -63.00 19870322 19870619
34 -161.00 -62.00 19870322 19870619
34 -160.00 -62.00 19870322 19870619
34 -162.00 -61.00 19870322 19870619
34 174.00 -60.00 19870322 19870619
34 175.00 -60.00 19870322 19870619
34 176.00 -60.00 19870322 19870619
34 172.00 -59.00 19870322 19870619
34 173.00 -59.00 19870322 19870619
34 174.00 -59.00 19870322 19870619
34 175.00 -59.00 19870322 19870619
34 176.00 -59.00 19870322 19870619
34 177.00 -59.00 19870322 19870619
34 178.00 -59.00 19870322 19870619
34 -176.00 -58.00 19870322 19870619
34 -175.00 -58.00 19870322 19870619
34 -166.00 -58.00 19870322 19870619
34 -165.00 -58.00 19870322 19870619
34 171.00 -58.00 19870322 19870619
34 172.00 -58.00 19870322 19870619
34 173.00 -58.00 19870322 19870619
34 174.00 -58.00 19870322 19870619
34 175.00 -58.00 19870322 19870619
34 176.00 -58.00 19870322 19870619
34 -178.00 -57.00 19870322 19870619
34 -177.00 -57.00 19870322 19870619
34 -176.00 -57.00 19870322 19870619
34 -175.00 -57.00 19870322 19870619
34 -173.00 -57.00 19870322 19870619
34 -172.00 -57.00 19870322 19870619
34 -171.00 -57.00 19870322 19870619
34 -170.00 -57.00 19870322 19870619
34 -169.00 -57.00 19870322 19870619
34 -168.00 -57.00 19870322 19870619
34 -167.00 -57.00 19870322 19870619
34 -166.00 -57.00 19870322 19870619
34 171.00 -57.00 19870322 19870619
34 172.00 -57.00 19870322 19870619
34 173.00 -57.00 19870322 19870619
34 -178.00 -56.00 19870322 19870619
34 -177.00 -56.00 19870322 19870619
34 -176.00 -56.00 19870322 19870619
34 -175.00 -56.00 19870322 19870619
34 -173.00 -56.00 19870322 19870619
34 -171.00 -56.00 19870322 19870619
34 -170.00 -56.00 19870322 19870619
34 -169.00 -56.00 19870322 19870619
34 -168.00 -56.00 19870322 19870619
34 -167.00 -56.00 19870322 19870619
34 -180.00 -55.00 19870322 19870619
34 -179.00 -55.00 19870322 19870619
34 -171.00 -55.00 19870322 19870619
34 -170.00 -55.00 19870322 19870619
34 -169.00 -55.00 19870322 19870619
34 -168.00 -55.00 19870322 19870619
34 -167.00 -55.00 19870322 19870619
34 179.00 -55.00 19870322 19870619
34 -172.00 -54.00 19870322 19870619
34 -171.00 -54.00 19870322 19870619
34 -173.00 -53.00 19870322 19870619
34 -172.00 -53.00 19870322 19870619
34 -173.00 -52.00 19870322 19870619
34 175.00 -61.00 19870323 19870620
34 176.00 -61.00 19870323 19870620
34 177.00 -61.00 19870323 19870620
34 177.00 -60.00 19870323 19870620
34 178.00 -60.00 19870323 19870620
34 179.00 -60.00 19870323 19870620
34 179.00 -59.00 19870323 19870620
34 -164.00 -58.00 19870323 19870620
34 -165.00 -57.00 19870323 19870620
34 -166.00 -56.00 19870323 19870620
34 -165.00 -56.00 19870323 19870620
34 -174.00 -55.00 19870323 19870620
34 -173.00 -55.00 19870323 19870620
34 -172.00 -55.00 19870323 19870620
34 -174.00 -54.00 19870323 19870620
34 -173.00 -54.00 19870323 19870620
34 -174.00 -53.00 19870323 19870620
34 -175.00 -52.00 19870323 19870620
34 -174.00 -52.00 19870323 19870620
34 -175.00 -51.00 19870323 19870620
34 -174.00 -51.00 19870323 19870620
34 -163.00 -51.00 19870323 19870620
34 -175.00 -50.00 19870323 19870620
34 -164.00 -50.00 19870323 19870620
34 -163.00 -50.00 19870323 19870620
34 -158.00 -62.00 19870324 19870621
34 -157.00 -62.00 19870324 19870621
34 -153.00 -58.00 19870324 19870621
34 -164.00 -57.00 19870324 19870621
34 -162.00 -57.00 19870324 19870621
34 -157.00 -57.00 19870324 19870621
34 -155.00 -57.00 19870324 19870621
34 -154.00 -57.00 19870324 19870621
34 -157.00 -56.00 19870324 19870621
34 -156.00 -56.00 19870324 19870621
34 -162.00 -51.00 19870324 19870621
34 -162.00 -50.00 19870324 19870621
34 155.00 -58.00 19870325 19870622
34 156.00 -58.00 19870325 19870622
34 -158.00 -56.00 19870325 19870622
34 -155.00 -56.00 19870325 19870622
34 -154.00 -56.00 19870325 19870622
34 -159.00 -55.00 19870325 19870622
34 -158.00 -55.00 19870325 19870622
34 -157.00 -55.00 19870325 19870622
34 -156.00 -55.00 19870325 19870622
34 -155.00 -55.00 19870325 19870622
34 -160.00 -54.00 19870325 19870622
34 -159.00 -54.00 19870325 19870622
34 -158.00 -54.00 19870325 19870622
34 -157.00 -54.00 19870325 19870622
34 -156.00 -54.00 19870325 19870622
34 -161.00 -53.00 19870325 19870622
34 -160.00 -53.00 19870325 19870622
34 -159.00 -53.00 19870325 19870622
34 -158.00 -53.00 19870325 19870622
34 -156.00 -53.00 19870325 19870622
34 -162.00 -52.00 19870325 19870622
34 -161.00 -52.00 19870325 19870622
34 -160.00 -52.00 19870325 19870622
34 -156.00 -52.00 19870325 19870622
34 -155.00 -52.00 19870325 19870622
34 -154.00 -52.00 19870325 19870622
34 -161.00 -51.00 19870325 19870622
34 -157.00 -51.00 19870325 19870622
34 -156.00 -51.00 19870325 19870622
34 -161.00 -50.00 19870325 19870622
34 -155.00 -51.00 19870326 19870623
34 -159.00 -56.00 19870327 19870624
34 -161.00 -55.00 19870327 19870624
34 -160.00 -55.00 19870327 19870624
34 -162.00 -54.00 19870327 19870624
34 -161.00 -54.00 19870327 19870624
34 -163.00 -53.00 19870327 19870624
34 -162.00 -53.00 19870327 19870624
34 -163.00 -52.00 19870327 19870624
34 -166.00 -55.00 19870328 19870625
34 -165.00 -55.00 19870328 19870625
34 -162.00 -55.00 19870328 19870625
34 -169.00 -54.00 19870328 19870625
34 -168.00 -54.00 19870328 19870625
34 -167.00 -54.00 19870328 19870625
34 -166.00 -54.00 19870328 19870625
34 -165.00 -54.00 19870328 19870625
34 -170.00 -53.00 19870328 19870625
34 -169.00 -53.00 19870328 19870625
34 -168.00 -53.00 19870328 19870625
34 -167.00 -53.00 19870328 19870625
34 -163.00 -54.00 19870329 19870626
34 -166.00 -53.00 19870329 19870626
34 -161.00 -57.00 19870330 19870627
34 -160.00 -57.00 19870330 19870627
34 -159.00 -57.00 19870330 19870627
34 -158.00 -57.00 19870330 19870627
34 -162.00 -56.00 19870330 19870627
34 -161.00 -56.00 19870330 19870627
34 -160.00 -56.00 19870330 19870627
34 -171.00 -51.00 19870330 19870627
34 -159.00 -58.00 19870331 19870628
34 -158.00 -58.00 19870331 19870628
34 -157.00 -58.00 19870331 19870628
34 -179.00 -61.00 19870404 19870702
34 -178.00 -61.00 19870404 19870702
34 -177.00 -61.00 19870404 19870702
34 -179.00 -60.00 19870404 19870702
34 -170.00 -54.00 19870404 19870702
34 -163.00 -59.00 19870405 19870703
34 -162.00 -59.00 19870405 19870703
34 -161.00 -59.00 19870405 19870703
34 -163.00 -58.00 19870405 19870703
34 -162.00 -58.00 19870405 19870703
34 -161.00 -58.00 19870405 19870703
34 -163.00 -57.00 19870405 19870703
34 -164.00 -56.00 19870405 19870703
34 -163.00 -56.00 19870405 19870703
34 -164.00 -55.00 19870405 19870703
34 -163.00 -55.00 19870405 19870703
34 -164.00 -54.00 19870405 19870703
34 -165.00 -53.00 19870405 19870703
34 -164.00 -53.00 19870405 19870703
34 -166.00 -52.00 19870405 19870703
34 -158.00 -60.00 19870406 19870704
34 -157.00 -60.00 19870406 19870704
34 -160.00 -59.00 19870406 19870704
34 -158.00 -59.00 19870406 19870704
34 -156.00 -62.00 19870407 19870705
34 -156.00 -61.00 19870407 19870705
34 -156.00 -60.00 19870407 19870705
34 -160.00 -58.00 19870409 19870707
34 -150.00 -52.00 19870409 19870707
34 -159.00 -59.00 19870410 19870708
34 -152.00 -50.00 19870410 19870708
34 -150.00 -50.00 19870410 19870708
34 -153.00 -49.00 19870410 19870708
34 -152.00 -49.00 19870410 19870708
34 -151.00 -49.00 19870410 19870708
34 -152.00 -48.00 19870410 19870708
34 -151.00 -48.00 19870410 19870708
34 -154.00 -55.00 19870411 19870709
34 -155.00 -54.00 19870411 19870709
34 -154.00 -54.00 19870411 19870709
34 -153.00 -54.00 19870411 19870709
34 -155.00 -53.00 19870411 19870709
34 -154.00 -53.00 19870411 19870709
34 -153.00 -52.00 19870411 19870709
34 -153.00 -51.00 19870412 19870710
34 -152.00 -51.00 19870412 19870710
34 -151.00 -51.00 19870412 19870710
34 -150.00 -51.00 19870412 19870710
34 -151.00 -50.00 19870412 19870710
34 -172.00 -52.00 19870413 19870711
34 -176.00 -50.00 19870413 19870711
34 -174.00 -50.00 19870413 19870711
34 -171.00 -53.00 19870414 19870712
34 -171.00 -52.00 19870414 19870712
34 -173.00 -51.00 19870414 19870712
34 -172.00 -51.00 19870414 19870712
34 -170.00 -51.00 19870414 19870712
34 -167.00 -51.00 19870414 19870712
34 -173.00 -50.00 19870414 19870712
34 -172.00 -50.00 19870414 19870712
34 -171.00 -50.00 19870414 19870712
34 -153.00 -50.00 19870417 19870715
34 -153.00 -53.00 19870501 19870729
34 157.00 -58.00 19870519 19870816
34 -163.00 -60.00 19870525 19870822
34 -162.00 -60.00 19870525 19870822
34 -161.00 -60.00 19870525 19870822
34 -160.00 -60.00 19870525 19870822
34 -159.00 -60.00 19870525 19870822
34 -161.00 -61.00 19870529 19870826
34 -160.00 -61.00 19870529 19870826
34 -159.00 -61.00 19870529 19870826
34 -161.00 -62.00 19870726 19871023
34 -159.00 -63.00 19870727 19871024
34 -158.00 -63.00 19870727 19871024
34 -157.00 -63.00 19870727 19871024
34 -156.00 -63.00 19870727 19871024
34 -159.00 -62.00 19870727 19871024
34 -160.00 -63.00 19870728 19871025
34 -158.00 -62.00 19870802 19871030
34 -157.00 -62.00 19870802 19871030
34 -156.00 -62.00 19870805 19871102
34 -155.00 -62.00 19870805 19871102
34 -155.00 -63.00 19870816 19871113

Patch 35 of 3734, Core period: 19980619-19980916
35 -173.00 -59.00 19980509 19980806
35 -178.00 -60.00 19980526 19980823
35 -177.00 -60.00 19980526 19980823
35 178.00 -60.00 19980526 19980823
35 179.00 -60.00 19980526 19980823
35 -176.00 -60.00 19980618 19980915
35 -179.00 -59.00 19980618 19980915
35 -178.00 -59.00 19980618 19980915
35 -177.00 -59.00 19980618 19980915
35 -176.00 -59.00 19980618 19980915
35 -175.00 -59.00 19980618 19980915
35 -174.00 -59.00 19980618 19980915
35 179.00 -59.00 19980618 19980915
35 -180.00 -58.00 19980618 19980915
35 -179.00 -58.00 19980618 19980915
35 -178.00 -58.00 19980618 19980915
35 -177.00 -58.00 19980618 19980915
35 -176.00 -58.00 19980618 19980915
35 -180.00 -57.00 19980626 19980923
35 -179.00 -57.00 19980626 19980923
35 -178.00 -57.00 19980626 19980923
35 -177.00 -57.00 19980626 19980923
35 -176.00 -57.00 19980626 19980923

Patch 36 of 3734, Core period: 19920123-19920505
36 170.00 -52.00 19920111 19920409
36 173.00 -55.00 19920112 19920410
36 174.00 -55.00 19920112 19920410
36 172.00 -54.00 19920112 19920410
36 173.00 -54.00 19920112 19920410
36 174.00 -54.00 19920112 19920410
36 175.00 -54.00 19920112 19920410
36 170.00 -53.00 19920112 19920410
36 171.00 -53.00 19920112 19920410
36 172.00 -53.00 19920112 19920410
36 170.00 -56.00 19920119 19920417
36 171.00 -56.00 19920119 19920417
36 172.00 -56.00 19920119 19920417
36 169.00 -55.00 19920119 19920417
36 170.00 -55.00 19920119 19920417
36 171.00 -55.00 19920119 19920417
36 172.00 -55.00 19920119 19920417
36 172.00 -57.00 19920122 19920420
36 173.00 -57.00 19920122 19920420
36 174.00 -59.00 19920123 19920421
36 175.00 -59.00 19920123 19920421
36 176.00 -59.00 19920123 19920421
36 172.00 -58.00 19920123 19920421
36 173.00 -58.00 19920123 19920421
36 174.00 -58.00 19920123 19920421
36 175.00 -58.00 19920123 19920421
36 168.00 -56.00 19920124 19920422
36 169.00 -56.00 19920124 19920422
36 168.00 -55.00 19920124 19920422
36 171.00 -59.00 19920125 19920423
36 172.00 -59.00 19920125 19920423
36 173.00 -59.00 19920125 19920423
36 170.00 -58.00 19920125 19920423
36 171.00 -58.00 19920125 19920423
36 169.00 -57.00 19920125 19920423
36 170.00 -57.00 19920125 19920423
36 171.00 -57.00 19920125 19920423
36 170.00 -59.00 19920129 19920427
36 177.00 -59.00 19920201 19920430
36 178.00 -59.00 19920201 19920430
36 179.00 -59.00 19920201 19920430
36 -180.00 -58.00 19920201 19920430
36 -179.00 -58.00 19920201 19920430
36 178.00 -58.00 19920201 19920430
36 179.00 -58.00 19920201 19920430
36 -180.00 -57.00 19920201 19920430
36 179.00 -57.00 19920201 19920430
36 177.00 -58.00 19920203 19920502
36 164.00 -59.00 19920205 19920504
36 165.00 -59.00 19920205 19920504
36 166.00 -59.00 19920205 19920504
36 167.00 -59.00 19920206 19920505
36 168.00 -59.00 19920206 19920505
36 169.00 -59.00 19920206 19920505
36 176.00 -58.00 19920206 19920505
36 176.00 -57.00 19920206 19920505
36 177.00 -57.00 19920206 19920505
36 178.00 -57.00 19920206 19920505
36 175.00 -56.00 19920206 19920505
36 176.00 -56.00 19920206 19920505
36 177.00 -56.00 19920206 19920505
36 178.00 -56.00 19920206 19920505
36 175.00 -55.00 19920206 19920505
36 168.00 -58.00 19920212 19920511
36 169.00 -58.00 19920212 19920511
36 167.00 -57.00 19920212 19920511
36 168.00 -57.00 19920212 19920511
36 167.00 -56.00 19920212 19920511

Patch 37 of 3734, Core period: 20150313-20150706
37 156.00 -44.00 20141102 20150130
37 156.00 -43.00 20141102 20150130
37 157.00 -43.00 20141103 20150131
37 158.00 -43.00 20150108 20150407
37 159.00 -43.00 20150108 20150407
37 156.00 -42.00 20150108 20150407
37 157.00 -42.00 20150108 20150407
37 158.00 -42.00 20150108 20150407
37 159.00 -42.00 20150108 20150407
37 160.00 -42.00 20150108 20150407
37 157.00 -41.00 20150108 20150407
37 158.00 -41.00 20150108 20150407
37 159.00 -41.00 20150109 20150408
37 160.00 -41.00 20150109 20150408
37 158.00 -40.00 20150109 20150408
37 159.00 -40.00 20150109 20150408
37 161.00 -41.00 20150124 20150423
37 161.00 -46.00 20150213 20150513
37 162.00 -46.00 20150213 20150513
37 163.00 -46.00 20150213 20150513
37 159.00 -45.00 20150213 20150513
37 160.00 -45.00 20150213 20150513
37 157.00 -44.00 20150213 20150513
37 158.00 -44.00 20150213 20150513
37 156.00 -43.00 20150213 20150513
37 162.00 -47.00 20150214 20150514
37 158.00 -45.00 20150214 20150514
37 156.00 -44.00 20150214 20150514
37 157.00 -43.00 20150214 20150514
37 163.00 -47.00 20150216 20150516
37 161.00 -60.00 20150219 20150519
37 162.00 -60.00 20150219 20150519
37 155.00 -57.00 20150220 20150520
37 156.00 -57.00 20150220 20150520
37 154.00 -56.00 20150220 20150520
37 155.00 -56.00 20150220 20150520
37 156.00 -56.00 20150220 20150520
37 152.00 -55.00 20150220 20150520
37 153.00 -55.00 20150220 20150520
37 154.00 -55.00 20150220 20150520
37 152.00 -54.00 20150220 20150520
37 153.00 -54.00 20150220 20150520
37 150.00 -53.00 20150220 20150520
37 151.00 -53.00 20150220 20150520
37 152.00 -53.00 20150220 20150520
37 150.00 -52.00 20150220 20150520
37 157.00 -58.00 20150221 20150521
37 158.00 -58.00 20150221 20150521
37 157.00 -57.00 20150221 20150521
37 157.00 -56.00 20150221 20150521
37 167.00 -53.00 20150223 20150523
37 166.00 -52.00 20150223 20150523
37 164.00 -48.00 20150223 20150523
37 173.00 -59.00 20150228 20150528
37 170.00 -58.00 20150228 20150528
37 171.00 -58.00 20150228 20150528
37 172.00 -58.00 20150228 20150528
37 170.00 -57.00 20150228 20150528
37 172.00 -56.00 20150228 20150528
37 165.00 -49.00 20150228 20150528
37 164.00 -47.00 20150228 20150528
37 160.00 -59.00 20150301 20150529
37 159.00 -58.00 20150301 20150529
37 158.00 -57.00 20150301 20150529
37 172.00 -60.00 20150302 20150530
37 173.00 -60.00 20150302 20150530
37 170.00 -59.00 20150302 20150530
37 171.00 -59.00 20150302 20150530
37 172.00 -59.00 20150302 20150530
37 169.00 -58.00 20150302 20150530
37 162.00 -42.00 20150304 20150601
37 163.00 -42.00 20150304 20150601
37 164.00 -42.00 20150304 20150601
37 162.00 -41.00 20150304 20150601
37 -171.00 -63.00 20150312 20150609
37 -170.00 -63.00 20150312 20150609
37 -169.00 -63.00 20150312 20150609
37 -168.00 -63.00 20150312 20150609
37 -175.00 -62.00 20150312 20150609
37 -174.00 -62.00 20150312 20150609
37 -173.00 -62.00 20150312 20150609
37 -172.00 -62.00 20150312 20150609
37 -171.00 -62.00 20150312 20150609
37 -175.00 -61.00 20150312 20150609
37 166.00 -57.00 20150313 20150610
37 167.00 -57.00 20150313 20150610
37 -170.00 -62.00 20150315 20150612
37 -174.00 -61.00 20150315 20150612
37 -173.00 -61.00 20150315 20150612
37 -172.00 -61.00 20150315 20150612
37 -171.00 -61.00 20150315 20150612
37 -170.00 -61.00 20150315 20150612
37 -169.00 -61.00 20150315 20150612
37 -175.00 -60.00 20150315 20150612
37 -174.00 -60.00 20150315 20150612
37 -173.00 -60.00 20150315 20150612
37 -172.00 -60.00 20150315 20150612
37 -171.00 -60.00 20150315 20150612
37 -174.00 -59.00 20150315 20150612
37 -173.00 -59.00 20150315 20150612
37 -175.00 -58.00 20150315 20150612
37 -174.00 -58.00 20150315 20150612
37 -176.00 -57.00 20150315 20150612
37 -175.00 -57.00 20150315 20150612
37 -175.00 -48.00 20150316 20150613
37 169.00 -59.00 20150319 20150616
37 165.00 -48.00 20150319 20150616
37 -177.00 -60.00 20150320 20150617
37 -176.00 -60.00 20150321 20150618
37 -178.00 -59.00 20150322 20150619
37 -177.00 -59.00 20150322 20150619
37 -176.00 -59.00 20150322 20150619
37 -175.00 -59.00 20150322 20150619
37 -178.00 -58.00 20150322 20150619
37 -177.00 -58.00 20150322 20150619
37 -176.00 -58.00 20150322 20150619
37 -173.00 -58.00 20150323 20150620
37 -172.00 -58.00 20150323 20150620
37 -180.00 -52.00 20150328 20150625
37 163.00 -60.00 20150329 20150626
37 164.00 -60.00 20150329 20150626
37 166.00 -60.00 20150329 20150626
37 177.00 -52.00 20150331 20150628
37 178.00 -52.00 20150331 20150628
37 168.00 -51.00 20150331 20150628
37 169.00 -51.00 20150331 20150628
37 170.00 -51.00 20150331 20150628
37 171.00 -51.00 20150331 20150628
37 172.00 -51.00 20150331 20150628
37 166.00 -50.00 20150331 20150628
37 167.00 -50.00 20150331 20150628
37 168.00 -50.00 20150331 20150628
37 169.00 -50.00 20150331 20150628
37 -171.00 -53.00 20150401 20150629
37 -170.00 -53.00 20150401 20150629
37 -176.00 -52.00 20150401 20150629
37 -175.00 -52.00 20150401 20150629
37 -174.00 -52.00 20150401 20150629
37 -172.00 -52.00 20150401 20150629
37 -178.00 -51.00 20150401 20150629
37 -174.00 -51.00 20150401 20150629
37 173.00 -51.00 20150401 20150629
37 170.00 -50.00 20150401 20150629
37 -179.00 -58.00 20150405 20150703
37 -180.00 -57.00 20150405 20150703
37 -179.00 -57.00 20150405 20150703
37 -178.00 -57.00 20150405 20150703
37 -177.00 -57.00 20150405 20150703
37 -174.00 -57.00 20150405 20150703
37 -173.00 -57.00 20150405 20150703
37 179.00 -57.00 20150405 20150703
37 -180.00 -56.00 20150405 20150703
37 -179.00 -56.00 20150405 20150703
37 -178.00 -56.00 20150405 20150703
37 -177.00 -56.00 20150405 20150703
37 -176.00 -56.00 20150405 20150703
37 -175.00 -56.00 20150405 20150703
37 173.00 -56.00 20150405 20150703
37 174.00 -56.00 20150405 20150703
37 175.00 -56.00 20150405 20150703
37 176.00 -56.00 20150405 20150703
37 177.00 -56.00 20150405 20150703
37 178.00 -56.00 20150405 20150703
37 179.00 -56.00 20150405 20150703
37 -180.00 -55.00 20150405 20150703
37 -179.00 -55.00 20150405 20150703
37 -178.00 -55.00 20150405 20150703
37 -177.00 -55.00 20150405 20150703
37 -176.00 -55.00 20150405 20150703
37 170.00 -55.00 20150405 20150703
37 171.00 -55.00 20150405 20150703
37 172.00 -55.00 20150405 20150703
37 173.00 -55.00 20150405 20150703
37 174.00 -55.00 20150405 20150703
37 175.00 -55.00 20150405 20150703
37 176.00 -55.00 20150405 20150703
37 177.00 -55.00 20150405 20150703
37 178.00 -55.00 20150405 20150703
37 179.00 -55.00 20150405 20150703
37 -180.00 -54.00 20150405 20150703
37 -179.00 -54.00 20150405 20150703
37 -178.00 -54.00 20150405 20150703
37 -177.00 -54.00 20150405 20150703
37 169.00 -54.00 20150405 20150703
37 170.00 -54.00 20150405 20150703
37 171.00 -54.00 20150405 20150703
37 172.00 -54.00 20150405 20150703
37 173.00 -54.00 20150405 20150703
37 174.00 -54.00 20150405 20150703
37 175.00 -54.00 20150405 20150703
37 176.00 -54.00 20150405 20150703
37 177.00 -54.00 20150405 20150703
37 178.00 -54.00 20150405 20150703
37 179.00 -54.00 20150405 20150703
37 -179.00 -53.00 20150405 20150703
37 -178.00 -53.00 20150405 20150703
37 -177.00 -53.00 20150405 20150703
37 168.00 -53.00 20150405 20150703
37 169.00 -53.00 20150405 20150703
37 170.00 -53.00 20150405 20150703
37 171.00 -53.00 20150405 20150703
37 172.00 -53.00 20150405 20150703
37 173.00 -53.00 20150405 20150703
37 174.00 -53.00 20150405 20150703
37 175.00 -53.00 20150405 20150703
37 176.00 -53.00 20150405 20150703
37 177.00 -53.00 20150405 20150703
37 178.00 -53.00 20150405 20150703
37 179.00 -53.00 20150405 20150703
37 167.00 -52.00 20150405 20150703
37 168.00 -52.00 20150405 20150703
37 171.00 -52.00 20150405 20150703
37 172.00 -52.00 20150405 20150703
37 173.00 -52.00 20150405 20150703
37 167.00 -51.00 20150405 20150703
37 -174.00 -56.00 20150406 20150704
37 -173.00 -56.00 20150406 20150704
37 -175.00 -55.00 20150406 20150704
37 -174.00 -55.00 20150406 20150704
37 -173.00 -55.00 20150406 20150704
37 -176.00 -54.00 20150406 20150704
37 -175.00 -54.00 20150406 20150704
37 -174.00 -54.00 20150406 20150704
37 -175.00 -53.00 20150406 20150704
37 -180.00 -53.00 20150407 20150705
37 -176.00 -53.00 20150407 20150705
37 -179.00 -52.00 20150407 20150705
37 174.00 -52.00 20150407 20150705
37 175.00 -52.00 20150407 20150705
37 179.00 -52.00 20150407 20150705
37 -178.00 -52.00 20150409 20150707
37 -177.00 -52.00 20150409 20150707
37 -179.00 -51.00 20150409 20150707
37 -177.00 -51.00 20150409 20150707
37 -175.00 -50.00 20150409 20150707
37 -174.00 -50.00 20150409 20150707
37 -175.00 -49.00 20150409 20150707
37 -175.00 -51.00 20150410 20150708
37 -176.00 -51.00 20150411 20150709
37 166.00 -56.00 20150415 20150713
37 -178.00 -60.00 20150418 20150716
37 171.00 -57.00 20150419 20150717
37 167.00 -56.00 20150419 20150717
37 168.00 -56.00 20150419 20150717
37 170.00 -56.00 20150419 20150717
37 171.00 -56.00 20150419 20150717
37 -178.00 -50.00 20150419 20150717
37 -179.00 -49.00 20150420 20150718
37 -180.00 -48.00 20150421 20150719
37 179.00 -48.00 20150421 20150719
37 165.00 -55.00 20150423 20150721
37 166.00 -55.00 20150423 20150721
37 167.00 -55.00 20150423 20150721
37 168.00 -55.00 20150423 20150721
37 169.00 -55.00 20150423 20150721
37 167.00 -54.00 20150423 20150721
37 168.00 -54.00 20150423 20150721
37 -172.00 -55.00 20150424 20150722
37 -173.00 -54.00 20150425 20150723
37 -172.00 -54.00 20150425 20150723
37 -174.00 -53.00 20150425 20150723
37 -173.00 -53.00 20150425 20150723
37 -172.00 -53.00 20150425 20150723
37 -173.00 -52.00 20150425 20150723
37 -171.00 -55.00 20150430 20150728
37 160.00 -58.00 20150503 20150731
37 158.00 -56.00 20150503 20150731
37 156.00 -55.00 20150503 20150731
37 157.00 -55.00 20150503 20150731
37 156.00 -54.00 20150503 20150731
37 157.00 -54.00 20150503 20150731
37 159.00 -56.00 20150504 20150801
37 158.00 -55.00 20150504 20150801
37 159.00 -55.00 20150504 20150801
37 158.00 -54.00 20150504 20150801
37 159.00 -54.00 20150504 20150801
37 160.00 -54.00 20150504 20150801
37 160.00 -53.00 20150504 20150801
37 164.00 -59.00 20150505 20150802
37 165.00 -59.00 20150505 20150802
37 166.00 -59.00 20150505 20150802
37 168.00 -59.00 20150505 20150802
37 167.00 -58.00 20150505 20150802
37 168.00 -58.00 20150505 20150802
37 166.00 -49.00 20150505 20150802
37 166.00 -48.00 20150505 20150802
37 167.00 -48.00 20150505 20150802
37 167.00 -49.00 20150506 20150803
37 160.00 -55.00 20150509 20150806
37 -171.00 -56.00 20150510 20150807
37 -170.00 -56.00 20150510 20150807
37 -173.00 -50.00 20150511 20150808
37 -172.00 -50.00 20150511 20150808
37 -172.00 -49.00 20150511 20150808
37 -172.00 -57.00 20150512 20150809
37 -171.00 -57.00 20150512 20150809
37 -170.00 -57.00 20150512 20150809
37 -169.00 -57.00 20150512 20150809
37 -172.00 -56.00 20150512 20150809
37 -174.00 -49.00 20150512 20150809
37 -173.00 -49.00 20150512 20150809
37 -174.00 -48.00 20150512 20150809
37 164.00 -54.00 20150527 20150824
37 165.00 -54.00 20150527 20150824
37 166.00 -54.00 20150527 20150824
37 163.00 -53.00 20150527 20150824

Patch 38 of 3734, Core period: 19900228-19900626
38 162.00 -54.00 19900217 19900517
38 163.00 -55.00 19900219 19900519
38 168.00 -56.00 19900220 19900520
38 169.00 -56.00 19900220 19900520
38 170.00 -56.00 19900220 19900520
38 171.00 -56.00 19900220 19900520
38 163.00 -54.00 19900221 19900521
38 164.00 -54.00 19900221 19900521
38 161.00 -53.00 19900221 19900521
38 168.00 -51.00 19900221 19900521
38 172.00 -51.00 19900222 19900522
38 169.00 -51.00 19900223 19900523
38 170.00 -51.00 19900223 19900523
38 171.00 -51.00 19900223 19900523
38 172.00 -54.00 19900226 19900526
38 173.00 -54.00 19900226 19900526
38 170.00 -53.00 19900226 19900526
38 171.00 -53.00 19900226 19900526
38 172.00 -53.00 19900226 19900526
38 173.00 -53.00 19900226 19900526
38 174.00 -53.00 19900226 19900526
38 -180.00 -57.00 19900227 19900527
38 -179.00 -57.00 19900227 19900527
38 -178.00 -57.00 19900227 19900527
38 168.00 -57.00 19900227 19900527
38 169.00 -57.00 19900227 19900527
38 171.00 -55.00 19900227 19900527
38 170.00 -52.00 19900227 19900527
38 171.00 -52.00 19900227 19900527
38 172.00 -52.00 19900227 19900527
38 178.00 -57.00 19900228 19900528
38 179.00 -57.00 19900228 19900528
38 172.00 -56.00 19900228 19900528
38 173.00 -56.00 19900228 19900528
38 174.00 -56.00 19900228 19900528
38 175.00 -56.00 19900228 19900528
38 176.00 -56.00 19900228 19900528
38 177.00 -56.00 19900228 19900528
38 178.00 -56.00 19900228 19900528
38 179.00 -56.00 19900228 19900528
38 172.00 -55.00 19900228 19900528
38 173.00 -55.00 19900228 19900528
38 174.00 -55.00 19900228 19900528
38 175.00 -55.00 19900228 19900528
38 176.00 -55.00 19900228 19900528
38 177.00 -55.00 19900228 19900528
38 178.00 -55.00 19900228 19900528
38 179.00 -55.00 19900228 19900528
38 174.00 -54.00 19900228 19900528
38 175.00 -54.00 19900228 19900528
38 176.00 -54.00 19900228 19900528
38 177.00 -54.00 19900228 19900528
38 178.00 -54.00 19900228 19900528
38 175.00 -53.00 19900228 19900528
38 176.00 -53.00 19900228 19900528
38 173.00 -52.00 19900228 19900528
38 -180.00 -56.00 19900301 19900529
38 164.00 -56.00 19900306 19900603
38 171.00 -54.00 19900307 19900604
38 159.00 -54.00 19900325 19900622
38 160.00 -54.00 19900325 19900622
38 161.00 -54.00 19900325 19900622
38 160.00 -53.00 19900325 19900622
38 169.00 -54.00 19900328 19900625
38 170.00 -54.00 19900328 19900625
38 168.00 -53.00 19900328 19900625
38 167.00 -52.00 19900328 19900625
38 168.00 -52.00 19900328 19900625
38 158.00 -53.00 19900409 19900707
38 159.00 -50.00 19900411 19900709
38 158.00 -49.00 19900411 19900709
38 159.00 -49.00 19900411 19900709
38 157.00 -48.00 19900411 19900709
38 158.00 -48.00 19900411 19900709
38 159.00 -53.00 19900412 19900710
38 157.00 -53.00 19900413 19900711
38 157.00 -52.00 19900413 19900711
38 167.00 -56.00 19900507 19900804
38 164.00 -55.00 19900507 19900804
38 165.00 -55.00 19900507 19900804
38 166.00 -55.00 19900507 19900804
38 167.00 -55.00 19900507 19900804
38 168.00 -55.00 19900507 19900804
38 165.00 -54.00 19900507 19900804
38 166.00 -54.00 19900507 19900804
38 167.00 -54.00 19900507 19900804
38 158.00 -52.00 19900507 19900804
38 159.00 -52.00 19900507 19900804
38 157.00 -51.00 19900507 19900804
38 158.00 -51.00 19900507 19900804

Patch 39 of 3734, Core period: 19951010-19960107
39 -179.00 -58.00 19951009 19960106
39 -178.00 -58.00 19951009 19960106
39 -180.00 -57.00 19951009 19960106
39 178.00 -57.00 19951009 19960106
39 179.00 -57.00 19951009 19960106
39 177.00 -56.00 19951009 19960106
39 178.00 -56.00 19951009 19960106
39 179.00 -56.00 19951009 19960106
39 175.00 -55.00 19951009 19960106
39 176.00 -55.00 19951009 19960106
39 177.00 -55.00 19951009 19960106
39 175.00 -54.00 19951009 19960106
39 176.00 -54.00 19951009 19960106
39 177.00 -54.00 19951009 19960106
39 -179.00 -57.00 19951012 19960109
39 178.00 -55.00 19951012 19960109

Patch 40 of 3734, Core period: 20060826-20061123
40 172.00 -54.00 20060810 20061107
40 -179.00 -58.00 20060825 20061122
40 -180.00 -57.00 20060825 20061122
40 -179.00 -57.00 20060825 20061122
40 -178.00 -57.00 20060825 20061122
40 -177.00 -57.00 20060825 20061122
40 -176.00 -57.00 20060825 20061122
40 176.00 -57.00 20060825 20061122
40 177.00 -57.00 20060825 20061122
40 178.00 -57.00 20060825 20061122
40 179.00 -57.00 20060825 20061122
40 171.00 -56.00 20060825 20061122
40 172.00 -56.00 20060825 20061122
40 174.00 -56.00 20060825 20061122
40 175.00 -56.00 20060825 20061122
40 176.00 -56.00 20060825 20061122
40 177.00 -56.00 20060825 20061122
40 178.00 -56.00 20060825 20061122
40 166.00 -55.00 20060825 20061122
40 167.00 -55.00 20060825 20061122
40 168.00 -55.00 20060825 20061122
40 169.00 -55.00 20060825 20061122
40 170.00 -55.00 20060825 20061122
40 171.00 -55.00 20060825 20061122
40 172.00 -55.00 20060825 20061122
40 173.00 -55.00 20060825 20061122
40 174.00 -55.00 20060825 20061122
40 175.00 -55.00 20060825 20061122
40 169.00 -54.00 20060825 20061122
40 170.00 -54.00 20060825 20061122
40 171.00 -54.00 20060825 20061122
40 173.00 -54.00 20060825 20061122
40 174.00 -54.00 20060825 20061122
40 175.00 -54.00 20060825 20061122
40 176.00 -54.00 20060825 20061122
40 173.00 -53.00 20060825 20061122
40 164.00 -54.00 20060826 20061123
40 165.00 -54.00 20060826 20061123
40 166.00 -54.00 20060826 20061123
40 167.00 -54.00 20060826 20061123
40 168.00 -54.00 20060826 20061123
40 163.00 -53.00 20060826 20061123
40 164.00 -53.00 20060826 20061123
40 165.00 -53.00 20060827 20061124
40 170.00 -53.00 20060827 20061124
40 171.00 -53.00 20060827 20061124
40 172.00 -53.00 20060827 20061124
40 174.00 -53.00 20060827 20061124

Patch 41 of 3734, Core period: 20171225-20180430
41 170.00 -45.00 20171123 20180220
41 178.00 -49.00 20171127 20180224
41 179.00 -49.00 20171127 20180224
41 177.00 -48.00 20171127 20180224
41 178.00 -48.00 20171127 20180224
41 175.00 -47.00 20171205 20180304
41 176.00 -47.00 20171205 20180304
41 177.00 -47.00 20171205 20180304
41 175.00 -46.00 20171205 20180304
41 176.00 -46.00 20171205 20180304
41 177.00 -46.00 20171205 20180304
41 178.00 -47.00 20171206 20180305
41 171.00 -44.00 20171206 20180305
41 171.00 -45.00 20171208 20180307
41 172.00 -44.00 20171209 20180308
41 176.00 -48.00 20171215 20180314
41 176.00 -45.00 20171224 20180323
41 172.00 -43.00 20171224 20180323
41 179.00 -53.00 20180103 20180402
41 178.00 -52.00 20180103 20180402
41 177.00 -51.00 20180103 20180402
41 178.00 -51.00 20180103 20180402
41 177.00 -50.00 20180103 20180402
41 178.00 -50.00 20180103 20180402
41 177.00 -49.00 20180103 20180402
41 176.00 -49.00 20180129 20180428
41 175.00 -48.00 20180129 20180428
41 173.00 -47.00 20180129 20180428
41 174.00 -47.00 20180129 20180428
41 173.00 -46.00 20180129 20180428
41 174.00 -46.00 20180129 20180428
41 172.00 -45.00 20180129 20180428
41 173.00 -45.00 20180129 20180428
41 179.00 -55.00 20180130 20180429
41 177.00 -54.00 20180130 20180429
41 178.00 -54.00 20180130 20180429
41 179.00 -54.00 20180130 20180429
41 176.00 -53.00 20180130 20180429
41 177.00 -53.00 20180130 20180429
41 178.00 -53.00 20180130 20180429
41 175.00 -52.00 20180130 20180429
41 176.00 -52.00 20180130 20180429
41 177.00 -52.00 20180130 20180429
41 174.00 -51.00 20180130 20180429
41 175.00 -51.00 20180130 20180429
41 176.00 -51.00 20180130 20180429
41 173.00 -50.00 20180130 20180429
41 174.00 -50.00 20180130 20180429
41 175.00 -50.00 20180130 20180429
41 176.00 -50.00 20180130 20180429
41 172.00 -49.00 20180130 20180429
41 173.00 -49.00 20180130 20180429
41 174.00 -49.00 20180130 20180429
41 179.00 -52.00 20180131 20180430
41 179.00 -51.00 20180131 20180430
41 177.00 -45.00 20180204 20180504
41 178.00 -56.00 20180210 20180510
41 179.00 -56.00 20180210 20180510
41 177.00 -55.00 20180210 20180510
41 178.00 -55.00 20180210 20180510
41 -180.00 -56.00 20180222 20180522
41 -179.00 -56.00 20180222 20180522
41 -180.00 -55.00 20180222 20180522
41 -180.00 -54.00 20180222 20180522
41 175.00 -49.00 20180223 20180523
41 178.00 -46.00 20180412 20180710

Patch 42 of 3734, Core period: 19880216-19880521
42 176.00 -53.00 19880108 19880406
42 177.00 -53.00 19880108 19880406
42 175.00 -52.00 19880109 19880407
42 176.00 -52.00 19880109 19880407
42 177.00 -52.00 19880215 19880514
42 -179.00 -55.00 19880221 19880520
42 178.00 -55.00 19880221 19880520
42 179.00 -55.00 19880221 19880520
42 -180.00 -54.00 19880221 19880520
42 -179.00 -54.00 19880221 19880520
42 176.00 -54.00 19880221 19880520
42 177.00 -54.00 19880221 19880520
42 178.00 -54.00 19880221 19880520
42 179.00 -54.00 19880221 19880520
42 178.00 -53.00 19880221 19880520
42 179.00 -53.00 19880221 19880520
42 -180.00 -53.00 19880223 19880522

Patch 43 of 3734, Core period: 19950308-19950606
43 -180.00 -54.00 19950228 19950528
43 179.00 -54.00 19950302 19950530
43 177.00 -54.00 19950307 19950604
43 178.00 -54.00 19950307 19950604
43 175.00 -53.00 19950308 19950605
43 176.00 -53.00 19950308 19950605
43 177.00 -53.00 19950308 19950605
43 178.00 -53.00 19950308 19950605
43 175.00 -52.00 19950308 19950605
43 176.00 -52.00 19950308 19950605
43 177.00 -52.00 19950308 19950605
43 -180.00 -53.00 19950407 19950705
43 179.00 -53.00 19950407 19950705

Patch 44 of 3734, Core period: 20161117-20170324
44 173.00 -53.00 20161116 20170213
44 175.00 -53.00 20161116 20170213
44 171.00 -52.00 20161116 20170213
44 172.00 -52.00 20161116 20170213
44 173.00 -52.00 20161116 20170213
44 174.00 -52.00 20161116 20170213
44 175.00 -52.00 20161116 20170213
44 176.00 -52.00 20161116 20170213
44 178.00 -52.00 20161116 20170213
44 170.00 -51.00 20161116 20170213
44 171.00 -51.00 20161116 20170213
44 172.00 -51.00 20161116 20170213
44 173.00 -51.00 20161116 20170213
44 174.00 -51.00 20161116 20170213
44 175.00 -51.00 20161116 20170213
44 176.00 -51.00 20161116 20170213
44 172.00 -50.00 20161116 20170213
44 173.00 -50.00 20161116 20170213
44 174.00 -50.00 20161116 20170213
44 175.00 -50.00 20161116 20170213
44 172.00 -49.00 20161116 20170213
44 177.00 -52.00 20161117 20170214
44 178.00 -51.00 20161117 20170214
44 179.00 -52.00 20161209 20170308
44 177.00 -54.00 20161224 20170323
44 178.00 -54.00 20161224 20170323
44 176.00 -53.00 20161224 20170323
44 177.00 -53.00 20161224 20170323
44 178.00 -53.00 20161224 20170323
44 179.00 -53.00 20161224 20170323
44 -180.00 -54.00 20161225 20170324
44 179.00 -54.00 20161225 20170324
44 -180.00 -53.00 20161225 20170324
44 -180.00 -52.00 20161225 20170324
44 -179.00 -52.00 20161225 20170324

Patch 45 of 3734, Core period: 20160222-20160523
45 -180.00 -54.00 20160221 20160520
45 -180.00 -53.00 20160221 20160520
45 -179.00 -53.00 20160221 20160520
45 179.00 -53.00 20160221 20160520
45 -180.00 -52.00 20160221 20160520
45 -179.00 -52.00 20160221 20160520
45 178.00 -53.00 20160223 20160522
45 178.00 -52.00 20160223 20160522
45 179.00 -52.00 20160223 20160522
45 176.00 -52.00 20160225 20160524
45 177.00 -52.00 20160225 20160524

Patch 46 of 3734, Core period: 20101206-20110406
46 -175.00 -53.00 20101115 20110212
46 -177.00 -52.00 20101115 20110212
46 -176.00 -52.00 20101115 20110212
46 173.00 -49.00 20101123 20110220
46 174.00 -49.00 20101123 20110220
46 170.00 -48.00 20101123 20110220
46 171.00 -48.00 20101123 20110220
46 172.00 -48.00 20101123 20110220
46 173.00 -48.00 20101123 20110220
46 174.00 -48.00 20101123 20110220
46 171.00 -47.00 20101123 20110220
46 172.00 -47.00 20101123 20110220
46 173.00 -47.00 20101123 20110220
46 174.00 -47.00 20101123 20110220
46 174.00 -50.00 20101125 20110222
46 178.00 -53.00 20101126 20110223
46 176.00 -52.00 20101201 20110228
46 174.00 -51.00 20101201 20110228
46 175.00 -50.00 20101201 20110228
46 176.00 -50.00 20101201 20110228
46 172.00 -49.00 20101201 20110228
46 175.00 -49.00 20101201 20110228
46 175.00 -48.00 20101201 20110228
46 176.00 -48.00 20101201 20110228
46 177.00 -52.00 20101202 20110301
46 178.00 -52.00 20101202 20110301
46 -180.00 -51.00 20101202 20110301
46 -179.00 -51.00 20101202 20110301
46 179.00 -51.00 20101202 20110301
46 -180.00 -50.00 20101202 20110301
46 178.00 -50.00 20101202 20110301
46 179.00 -50.00 20101202 20110301
46 178.00 -49.00 20101202 20110301
46 179.00 -49.00 20101202 20110301
46 173.00 -53.00 20101205 20110304
46 -175.00 -52.00 20101205 20110304
46 -174.00 -52.00 20101205 20110304
46 172.00 -52.00 20101205 20110304
46 173.00 -52.00 20101205 20110304
46 -178.00 -51.00 20101205 20110304
46 -177.00 -51.00 20101205 20110304
46 -176.00 -51.00 20101205 20110304
46 -174.00 -51.00 20101205 20110304
46 -173.00 -51.00 20101205 20110304
46 172.00 -51.00 20101205 20110304
46 173.00 -51.00 20101205 20110304
46 -179.00 -50.00 20101205 20110304
46 -178.00 -50.00 20101205 20110304
46 -177.00 -50.00 20101205 20110304
46 -176.00 -50.00 20101205 20110304
46 -175.00 -50.00 20101205 20110304
46 -179.00 -49.00 20101205 20110304
46 -178.00 -49.00 20101205 20110304
46 -177.00 -49.00 20101205 20110304
46 -176.00 -49.00 20101205 20110304
46 -172.00 -51.00 20101206 20110305
46 -171.00 -51.00 20101206 20110305
46 -170.00 -51.00 20101206 20110305
46 -174.00 -50.00 20101206 20110305
46 -173.00 -50.00 20101206 20110305
46 -172.00 -50.00 20101206 20110305
46 -171.00 -50.00 20101206 20110305
46 -175.00 -49.00 20101206 20110305
46 -174.00 -49.00 20101206 20110305
46 -173.00 -49.00 20101206 20110305
46 -172.00 -49.00 20101206 20110305
46 -176.00 -48.00 20101206 20110305
46 -175.00 -48.00 20101206 20110305
46 -174.00 -48.00 20101206 20110305
46 171.00 -49.00 20101216 20110315
46 175.00 -51.00 20101217 20110316
46 176.00 -51.00 20101217 20110316
46 178.00 -51.00 20101217 20110316
46 176.00 -49.00 20101217 20110316
46 -180.00 -52.00 20101218 20110317
46 179.00 -52.00 20101218 20110317
46 169.00 -51.00 20101218 20110317
46 170.00 -51.00 20101218 20110317
46 177.00 -51.00 20101218 20110317
46 168.00 -50.00 20101218 20110317
46 169.00 -50.00 20101218 20110317
46 172.00 -50.00 20101218 20110317
46 170.00 -49.00 20101218 20110317
46 177.00 -49.00 20101218 20110317
46 -167.00 -54.00 20101219 20110318
46 -170.00 -53.00 20101219 20110318
46 -169.00 -53.00 20101219 20110318
46 -168.00 -53.00 20101219 20110318
46 -173.00 -52.00 20101219 20110318
46 -172.00 -52.00 20101219 20110318
46 -171.00 -52.00 20101219 20110318
46 -170.00 -52.00 20101219 20110318
46 -168.00 -56.00 20101220 20110319
46 -176.00 -53.00 20101220 20110319
46 -174.00 -53.00 20101220 20110319
46 -173.00 -53.00 20101220 20110319
46 -172.00 -53.00 20101220 20110319
46 -179.00 -52.00 20101220 20110319
46 -178.00 -52.00 20101220 20110319
46 -170.00 -55.00 20101223 20110322
46 -169.00 -55.00 20101223 20110322
46 -168.00 -55.00 20101223 20110322
46 -173.00 -54.00 20101223 20110322
46 -172.00 -54.00 20101223 20110322
46 -171.00 -54.00 20101223 20110322
46 -170.00 -54.00 20101223 20110322
46 -169.00 -54.00 20101223 20110322
46 -168.00 -54.00 20101223 20110322
46 -171.00 -53.00 20101223 20110322
46 -167.00 -56.00 20101224 20110323
46 -166.00 -56.00 20101224 20110323
46 -165.00 -56.00 20101224 20110323
46 -167.00 -55.00 20101224 20110323
46 -166.00 -55.00 20101224 20110323
46 -169.00 -52.00 20101227 20110326
46 -175.00 -51.00 20101227 20110326
46 -165.00 -55.00 20110106 20110405
46 -166.00 -54.00 20110106 20110405
46 -165.00 -54.00 20110106 20110405
46 -167.00 -53.00 20110106 20110405
46 -166.00 -53.00 20110106 20110405
46 -165.00 -53.00 20110106 20110405
46 -163.00 -53.00 20110106 20110405
46 -162.00 -53.00 20110106 20110405
46 -166.00 -52.00 20110106 20110405
46 -165.00 -52.00 20110106 20110405
46 -164.00 -52.00 20110106 20110405
46 -163.00 -52.00 20110106 20110405
46 -162.00 -52.00 20110106 20110405
46 -166.00 -51.00 20110106 20110405
46 -165.00 -51.00 20110106 20110405
46 -164.00 -51.00 20110106 20110405
46 -163.00 -51.00 20110106 20110405
46 -166.00 -50.00 20110106 20110405
46 -165.00 -50.00 20110106 20110405
46 -164.00 -50.00 20110106 20110405
46 -167.00 -49.00 20110106 20110405
46 -166.00 -49.00 20110106 20110405
46 -167.00 -50.00 20110107 20110406
46 -167.00 -51.00 20110108 20110407
46 -168.00 -52.00 20110111 20110410
46 -168.00 -51.00 20110113 20110412
46 -165.00 -57.00 20110115 20110414
46 -164.00 -57.00 20110115 20110414
46 -167.00 -52.00 20110117 20110416
46 -169.00 -51.00 20110117 20110416
46 -180.00 -49.00 20110117 20110416
46 -180.00 -48.00 20110117 20110416
46 -179.00 -48.00 20110117 20110416
46 179.00 -48.00 20110117 20110416
46 -160.00 -54.00 20110118 20110417
46 -164.00 -53.00 20110118 20110417
46 -167.00 -48.00 20110119 20110418
46 -161.00 -56.00 20110127 20110426
46 -160.00 -56.00 20110127 20110426
46 -163.00 -55.00 20110127 20110426
46 -162.00 -55.00 20110127 20110426
46 -161.00 -55.00 20110127 20110426
46 -160.00 -55.00 20110127 20110426
46 -164.00 -54.00 20110127 20110426
46 -163.00 -54.00 20110127 20110426
46 -158.00 -57.00 20110129 20110428
46 -159.00 -56.00 20110129 20110428
46 -158.00 -56.00 20110129 20110428
46 -159.00 -55.00 20110129 20110428
46 -158.00 -55.00 20110129 20110428
46 -162.00 -54.00 20110129 20110428
46 -161.00 -54.00 20110129 20110428
46 -167.00 -57.00 20110317 20110614
46 -166.00 -57.00 20110317 20110614

Patch 47 of 3734, Core period: 20020327-20020713
47 -171.00 -51.00 20020320 20020617
47 -170.00 -51.00 20020320 20020617
47 -172.00 -50.00 20020320 20020617
47 -171.00 -50.00 20020320 20020617
47 -168.00 -52.00 20020321 20020618
47 -167.00 -52.00 20020321 20020618
47 -168.00 -51.00 20020321 20020618
47 -167.00 -49.00 20020321 20020618
47 -166.00 -49.00 20020321 20020618
47 -172.00 -49.00 20020323 20020620
47 -171.00 -48.00 20020323 20020620
47 -170.00 -48.00 20020323 20020620
47 -169.00 -48.00 20020323 20020620
47 -168.00 -48.00 20020323 20020620
47 -167.00 -48.00 20020323 20020620
47 -172.00 -52.00 20020326 20020623
47 -171.00 -52.00 20020326 20020623
47 -172.00 -51.00 20020326 20020623
47 -173.00 -50.00 20020326 20020623
47 -171.00 -53.00 20020327 20020624
47 -170.00 -53.00 20020327 20020624
47 -174.00 -50.00 20020327 20020624
47 -174.00 -49.00 20020327 20020624
47 -173.00 -49.00 20020327 20020624
47 -175.00 -48.00 20020327 20020624
47 -174.00 -48.00 20020327 20020624
47 -173.00 -48.00 20020327 20020624
47 -172.00 -48.00 20020327 20020624
47 -172.00 -47.00 20020327 20020624
47 -171.00 -47.00 20020327 20020624
47 -170.00 -47.00 20020327 20020624
47 -171.00 -45.00 20020327 20020624
47 -170.00 -45.00 20020327 20020624
47 -170.00 -52.00 20020328 20020625
47 -169.00 -53.00 20020329 20020626
47 -168.00 -53.00 20020329 20020626
47 -169.00 -52.00 20020329 20020626
47 -167.00 -51.00 20020329 20020626
47 -174.00 -47.00 20020330 20020627
47 -172.00 -46.00 20020330 20020627
47 -171.00 -46.00 20020330 20020627
47 -173.00 -45.00 20020330 20020627
47 -172.00 -45.00 20020330 20020627
47 -179.00 -50.00 20020414 20020712
47 -179.00 -48.00 20020414 20020712
47 -177.00 -47.00 20020414 20020712
47 -176.00 -47.00 20020414 20020712
47 -178.00 -46.00 20020414 20020712
47 -177.00 -46.00 20020414 20020712
47 -178.00 -47.00 20020416 20020714
47 -176.00 -48.00 20020417 20020715
47 -180.00 -50.00 20020423 20020721
47 -180.00 -49.00 20020423 20020721
47 -179.00 -49.00 20020423 20020721
47 179.00 -49.00 20020423 20020721
47 -179.00 -46.00 20020425 20020723
47 -180.00 -45.00 20020425 20020723
47 -179.00 -45.00 20020425 20020723
47 -172.00 -44.00 20020521 20020818
47 -171.00 -44.00 20020521 20020818
47 -172.00 -43.00 20020521 20020818
47 -171.00 -43.00 20020521 20020818

Patch 48 of 3734, Core period: 19921108-19930308
48 179.00 -49.00 19921106 19930203
48 -180.00 -49.00 19921107 19930204
48 -179.00 -49.00 19921107 19930204
48 -178.00 -49.00 19921107 19930204
48 -179.00 -48.00 19921206 19930305
48 -177.00 -50.00 19921207 19930306
48 -178.00 -48.00 19921207 19930306
48 -176.00 -50.00 19921208 19930307
48 -175.00 -50.00 19921208 19930307
48 -177.00 -49.00 19921208 19930307
48 -176.00 -49.00 19921208 19930307
48 -177.00 -48.00 19921208 19930307
48 -176.00 -48.00 19921208 19930307

Patch 49 of 3734, Core period: 20040114-20040417
49 179.00 -44.00 20031218 20040316
49 -177.00 -46.00 20031219 20040317
49 -176.00 -46.00 20031219 20040317
49 -175.00 -46.00 20031219 20040317
49 -178.00 -45.00 20031219 20040317
49 -177.00 -45.00 20031219 20040317
49 -176.00 -45.00 20031219 20040317
49 -175.00 -45.00 20031219 20040317
49 -178.00 -44.00 20031219 20040317
49 -177.00 -44.00 20031219 20040317
49 -176.00 -44.00 20031219 20040317
49 -178.00 -43.00 20031219 20040317
49 -174.00 -47.00 20031220 20040318
49 178.00 -43.00 20031229 20040327
49 177.00 -44.00 20040112 20040410
49 -180.00 -48.00 20040113 20040411
49 -179.00 -48.00 20040113 20040411
49 -178.00 -48.00 20040113 20040411
49 178.00 -48.00 20040113 20040411
49 179.00 -48.00 20040113 20040411
49 179.00 -47.00 20040113 20040411
49 -166.00 -49.00 20040114 20040412
49 -176.00 -49.00 20040116 20040414
49 -177.00 -48.00 20040116 20040414
49 -180.00 -47.00 20040116 20040414
49 -179.00 -47.00 20040116 20040414
49 -178.00 -47.00 20040116 20040414
49 178.00 -47.00 20040116 20040414
49 -180.00 -46.00 20040116 20040414
49 178.00 -46.00 20040116 20040414
49 179.00 -46.00 20040116 20040414
49 -180.00 -45.00 20040116 20040414
49 177.00 -45.00 20040116 20040414
49 178.00 -45.00 20040116 20040414
49 179.00 -45.00 20040116 20040414
49 178.00 -44.00 20040116 20040414
49 -174.00 -51.00 20040118 20040416
49 -175.00 -50.00 20040118 20040416
49 -174.00 -50.00 20040118 20040416
49 -175.00 -49.00 20040118 20040416
49 -174.00 -49.00 20040118 20040416
49 -173.00 -49.00 20040118 20040416
49 -176.00 -48.00 20040118 20040416
49 -175.00 -48.00 20040118 20040416
49 -174.00 -48.00 20040118 20040416
49 -171.00 -48.00 20040118 20040416
49 -177.00 -47.00 20040118 20040416
49 -176.00 -47.00 20040118 20040416
49 -175.00 -47.00 20040118 20040416
49 -172.00 -47.00 20040118 20040416
49 -171.00 -47.00 20040118 20040416
49 -170.00 -47.00 20040118 20040416
49 -179.00 -46.00 20040118 20040416
49 -178.00 -46.00 20040118 20040416
49 -174.00 -46.00 20040118 20040416
49 -173.00 -46.00 20040118 20040416
49 -172.00 -46.00 20040118 20040416
49 -171.00 -46.00 20040118 20040416
49 -179.00 -45.00 20040118 20040416
49 -173.00 -45.00 20040118 20040416
49 -170.00 -48.00 20040119 20040417
49 -169.00 -48.00 20040119 20040417
49 -172.00 -49.00 20040120 20040418
49 -167.00 -48.00 20040120 20040418
49 -167.00 -50.00 20040121 20040419
49 -168.00 -49.00 20040121 20040419
49 -167.00 -49.00 20040121 20040419
49 -173.00 -50.00 20040122 20040420
49 -172.00 -50.00 20040122 20040420
49 -174.00 -45.00 20040129 20040427
49 178.00 -49.00 20040201 20040430

Patch 50 of 3734, Core period: 19950403-19950725
50 174.00 -40.00 19950306 19950603
50 -179.00 -42.00 19950309 19950606
50 -178.00 -44.00 19950312 19950609
50 -179.00 -43.00 19950312 19950609
50 -178.00 -43.00 19950312 19950609
50 174.00 -41.00 19950317 19950614
50 175.00 -41.00 19950317 19950614
50 177.00 -41.00 19950319 19950616
50 175.00 -42.00 19950323 19950620
50 176.00 -42.00 19950324 19950621
50 -180.00 -41.00 19950324 19950621
50 -179.00 -41.00 19950324 19950621
50 176.00 -43.00 19950402 19950630
50 177.00 -42.00 19950402 19950630
50 173.00 -43.00 19950403 19950701
50 174.00 -43.00 19950403 19950701
50 175.00 -43.00 19950403 19950701
50 -177.00 -39.00 19950404 19950702
50 -177.00 -38.00 19950404 19950702
50 -176.00 -38.00 19950404 19950702
50 -176.00 -37.00 19950404 19950702
50 -180.00 -45.00 19950418 19950716
50 -179.00 -45.00 19950418 19950716
50 173.00 -39.00 19950419 19950717
50 176.00 -44.00 19950420 19950718
50 -178.00 -39.00 19950423 19950721
50 -178.00 -40.00 19950424 19950722
50 -176.00 -40.00 19950424 19950722
50 -180.00 -44.00 19950425 19950723
50 -179.00 -44.00 19950425 19950723
50 -180.00 -43.00 19950425 19950723
50 177.00 -43.00 19950425 19950723
50 178.00 -43.00 19950425 19950723
50 179.00 -43.00 19950425 19950723
50 -180.00 -42.00 19950425 19950723
50 -176.00 -39.00 19950425 19950723
50 -175.00 -39.00 19950425 19950723
50 -175.00 -38.00 19950425 19950723
50 -175.00 -37.00 19950425 19950723
50 -174.00 -37.00 19950425 19950723
50 -178.00 -45.00 19950426 19950724
50 -177.00 -44.00 19950426 19950724
50 -176.00 -44.00 19950426 19950724
50 -177.00 -40.00 19950426 19950724
50 -176.00 -36.00 19950426 19950724
50 -175.00 -36.00 19950426 19950724
50 -174.00 -36.00 19950426 19950724
50 173.00 -38.00 19950511 19950808
50 -174.00 -38.00 19950516 19950813
50 174.00 -39.00 19950526 19950823
50 174.00 -38.00 19950526 19950823
50 179.00 -44.00 19950527 19950824
50 -174.00 -40.00 19950528 19950825
50 -174.00 -39.00 19950528 19950825

Patch 51 of 3734, Core period: 20110227-20110723
51 178.00 -41.00 20110225 20110525
51 178.00 -40.00 20110225 20110525
51 179.00 -40.00 20110225 20110525
51 178.00 -39.00 20110225 20110525
51 179.00 -39.00 20110225 20110525
51 -180.00 -42.00 20110226 20110526
51 -180.00 -41.00 20110226 20110526
51 -179.00 -41.00 20110226 20110526
51 179.00 -41.00 20110226 20110526
51 -179.00 -42.00 20110227 20110527
51 -180.00 -40.00 20110227 20110527
51 179.00 -43.00 20110331 20110628
51 179.00 -42.00 20110415 20110713
51 177.00 -38.00 20110423 20110721
51 -180.00 -38.00 20110424 20110722
51 178.00 -38.00 20110424 20110722
51 179.00 -38.00 20110424 20110722
51 177.00 -37.00 20110424 20110722
51 178.00 -37.00 20110424 20110722
51 179.00 -37.00 20110424 20110722
51 178.00 -36.00 20110424 20110722
51 179.00 -36.00 20110424 20110722

Patch 52 of 3734, Core period: 20100512-20100815
52 173.00 -43.00 20100510 20100807
52 174.00 -43.00 20100511 20100808
52 178.00 -42.00 20100511 20100808
52 -180.00 -40.00 20100511 20100808
52 -180.00 -39.00 20100511 20100808
52 -180.00 -38.00 20100511 20100808
52 179.00 -38.00 20100511 20100808
52 -179.00 -40.00 20100512 20100809
52 -179.00 -39.00 20100512 20100809
52 -178.00 -39.00 20100512 20100809
52 175.00 -43.00 20100515 20100812
52 175.00 -42.00 20100515 20100812
52 176.00 -42.00 20100515 20100812
52 176.00 -43.00 20100517 20100814
52 177.00 -43.00 20100517 20100814
52 177.00 -42.00 20100517 20100814
52 179.00 -42.00 20100517 20100814
52 178.00 -41.00 20100517 20100814
52 179.00 -41.00 20100517 20100814
52 178.00 -40.00 20100517 20100814
52 179.00 -40.00 20100517 20100814
52 179.00 -39.00 20100517 20100814
52 -180.00 -41.00 20100624 20100921
52 -179.00 -41.00 20100624 20100921

Patch 53 of 3734, Core period: 19810531-19810831
53 -180.00 -41.00 19810511 19810808
53 -179.00 -41.00 19810517 19810814
53 -179.00 -40.00 19810518 19810815
53 -177.00 -42.00 19810530 19810827
53 -176.00 -42.00 19810530 19810827
53 -173.00 -42.00 19810530 19810827
53 -178.00 -41.00 19810530 19810827
53 -177.00 -41.00 19810530 19810827
53 -176.00 -41.00 19810530 19810827
53 -175.00 -41.00 19810530 19810827
53 -174.00 -41.00 19810530 19810827
53 -180.00 -40.00 19810530 19810827
53 -174.00 -43.00 19810531 19810828
53 -173.00 -43.00 19810531 19810828
53 -175.00 -42.00 19810531 19810828
53 -174.00 -42.00 19810531 19810828
53 -173.00 -41.00 19810531 19810828
53 -173.00 -45.00 19810601 19810829
53 -174.00 -44.00 19810601 19810829
53 -173.00 -44.00 19810601 19810829
53 -178.00 -40.00 19810602 19810830
53 -177.00 -40.00 19810602 19810830
53 -176.00 -40.00 19810602 19810830
53 -180.00 -39.00 19810602 19810830
53 -179.00 -39.00 19810602 19810830
53 -178.00 -39.00 19810602 19810830
53 -177.00 -39.00 19810602 19810830
53 179.00 -39.00 19810602 19810830
53 -180.00 -38.00 19810602 19810830
53 -179.00 -38.00 19810602 19810830
53 179.00 -38.00 19810602 19810830
53 -174.00 -45.00 19810615 19810912

Patch 54 of 3734, Core period: 19920613-19921002
54 174.00 -46.00 19920605 19920902
54 175.00 -45.00 19920605 19920902
54 173.00 -45.00 19920612 19920909
54 174.00 -45.00 19920612 19920909
54 175.00 -44.00 19920612 19920909
54 176.00 -44.00 19920612 19920909
54 173.00 -44.00 19920704 19921001
54 174.00 -44.00 19920704 19921001
54 173.00 -43.00 19920704 19921001
54 174.00 -43.00 19920704 19921001
54 175.00 -43.00 19920704 19921001
54 177.00 -42.00 19920704 19921001
54 178.00 -42.00 19920704 19921001
54 -179.00 -41.00 19920704 19921001
54 -178.00 -41.00 19920704 19921001
54 177.00 -41.00 19920704 19921001
54 178.00 -41.00 19920704 19921001
54 -180.00 -40.00 19920704 19921001
54 179.00 -40.00 19920704 19921001
54 177.00 -43.00 19920717 19921014
54 178.00 -43.00 19920717 19921014
54 176.00 -43.00 19920724 19921021

Patch 55 of 3734, Core period: 20090425-20090730
55 179.00 -38.00 20090418 20090716
55 -180.00 -37.00 20090418 20090716
55 179.00 -37.00 20090418 20090716
55 -178.00 -40.00 20090419 20090717
55 -179.00 -39.00 20090419 20090717
55 -178.00 -39.00 20090419 20090717
55 179.00 -39.00 20090419 20090717
55 -180.00 -38.00 20090419 20090717
55 -179.00 -38.00 20090419 20090717
55 -178.00 -38.00 20090419 20090717
55 -179.00 -37.00 20090419 20090717
55 -178.00 -41.00 20090424 20090722
55 -177.00 -41.00 20090428 20090726
55 -176.00 -41.00 20090428 20090726
55 -177.00 -40.00 20090428 20090726
55 -177.00 -38.00 20090430 20090728
55 -178.00 -37.00 20090430 20090728
55 -177.00 -37.00 20090430 20090728
55 -176.00 -37.00 20090430 20090728
55 -179.00 -36.00 20090430 20090728
55 -176.00 -36.00 20090430 20090728
55 -170.00 -41.00 20090501 20090729
55 -171.00 -40.00 20090501 20090729
55 -170.00 -40.00 20090501 20090729
55 -173.00 -39.00 20090501 20090729
55 -172.00 -39.00 20090501 20090729
55 -171.00 -39.00 20090501 20090729
55 -170.00 -39.00 20090501 20090729
55 -176.00 -38.00 20090501 20090729
55 -174.00 -38.00 20090501 20090729
55 -173.00 -38.00 20090501 20090729
55 -172.00 -38.00 20090501 20090729
55 -171.00 -38.00 20090501 20090729
55 -175.00 -37.00 20090501 20090729
55 -174.00 -37.00 20090501 20090729
55 -173.00 -37.00 20090501 20090729
55 -175.00 -36.00 20090501 20090729
55 -174.00 -36.00 20090501 20090729
55 -170.00 -38.00 20090607 20090904
55 -172.00 -37.00 20090607 20090904
55 -171.00 -37.00 20090607 20090904
55 -170.00 -37.00 20090607 20090904
55 -173.00 -36.00 20090607 20090904
55 -172.00 -36.00 20090607 20090904
55 -171.00 -36.00 20090607 20090904

Patch 56 of 3734, Core period: 19961213-19970501
56 176.00 -32.00 19961210 19970309
56 175.00 -31.00 19961210 19970309
56 177.00 -34.00 19961211 19970310
56 178.00 -34.00 19961211 19970310
56 176.00 -33.00 19961211 19970310
56 177.00 -33.00 19961211 19970310
56 179.00 -38.00 19961212 19970311
56 -180.00 -36.00 19961212 19970311
56 179.00 -36.00 19961212 19970311
56 178.00 -35.00 19961212 19970311
56 179.00 -35.00 19961212 19970311
56 -174.00 -40.00 19961213 19970312
56 -175.00 -39.00 19961213 19970312
56 176.00 -31.00 19961223 19970322
56 179.00 -39.00 19961226 19970325
56 -180.00 -37.00 19961226 19970325
56 179.00 -37.00 19961226 19970325
56 -179.00 -36.00 19961227 19970326
56 -177.00 -38.00 19961229 19970328
56 -176.00 -38.00 19961229 19970328
56 -177.00 -37.00 19961229 19970328
56 -170.00 -39.00 19970102 19970401
56 -171.00 -38.00 19970102 19970401
56 -170.00 -38.00 19970102 19970401
56 -179.00 -37.00 19970109 19970408
56 -171.00 -39.00 19970112 19970411
56 -171.00 -40.00 19970115 19970414
56 -178.00 -38.00 19970125 19970424
56 -178.00 -37.00 19970127 19970426
56 -175.00 -38.00 19970130 19970429
56 -176.00 -37.00 19970130 19970429
56 -173.00 -39.00 19970131 19970430
56 -172.00 -39.00 19970131 19970430
56 -174.00 -38.00 19970131 19970430
56 -173.00 -38.00 19970131 19970430
56 -172.00 -38.00 19970131 19970430
56 -179.00 -38.00 19970211 19970511
56 -174.00 -39.00 19970212 19970512
56 -173.00 -40.00 19970213 19970513
56 -173.00 -41.00 19970214 19970514
56 -172.00 -40.00 19970214 19970514
56 -178.00 -39.00 19970306 19970603

Patch 57 of 3734, Core period: 19981103-19990131
57 178.00 -33.00 19981026 19990123
57 -179.00 -36.00 19981102 19990130
57 -178.00 -36.00 19981102 19990130
57 -180.00 -35.00 19981102 19990130
57 -179.00 -35.00 19981102 19990130
57 -180.00 -34.00 19981102 19990130
57 179.00 -34.00 19981102 19990130
57 -180.00 -33.00 19981102 19990130
57 179.00 -33.00 19981102 19990130
57 -180.00 -32.00 19981102 19990130
57 178.00 -32.00 19981102 19990130
57 179.00 -32.00 19981102 19990130

Patch 58 of 3734, Core period: 20110214-20110618
58 -177.00 -31.00 20110207 20110507
58 -176.00 -36.00 20110208 20110508
58 -177.00 -32.00 20110208 20110508
58 -176.00 -35.00 20110212 20110512
58 -177.00 -33.00 20110213 20110513
58 -176.00 -33.00 20110213 20110513
58 -179.00 -32.00 20110213 20110513
58 -178.00 -32.00 20110213 20110513
58 -177.00 -34.00 20110308 20110605
58 -180.00 -34.00 20110319 20110616
58 -180.00 -33.00 20110319 20110616
58 -178.00 -35.00 20110320 20110617
58 -177.00 -35.00 20110320 20110617
58 -179.00 -34.00 20110320 20110617
58 -178.00 -34.00 20110320 20110617
58 -179.00 -33.00 20110320 20110617
58 -178.00 -33.00 20110320 20110617
58 -180.00 -32.00 20110320 20110617
58 -179.00 -35.00 20110326 20110623
58 -177.00 -37.00 20110425 20110723
58 -176.00 -37.00 20110425 20110723
58 -179.00 -36.00 20110425 20110723
58 -178.00 -36.00 20110425 20110723
58 -177.00 -36.00 20110425 20110723

Patch 59 of 3734, Core period: 19961211-19970312
59 -180.00 -32.00 19961209 19970308
59 -179.00 -32.00 19961209 19970308
59 -180.00 -31.00 19961209 19970308
59 -180.00 -30.00 19961209 19970308
59 -179.00 -30.00 19961209 19970308
59 -180.00 -29.00 19961209 19970308
59 179.00 -31.00 19961210 19970309
59 178.00 -30.00 19961210 19970309
59 179.00 -30.00 19961210 19970309
59 177.00 -29.00 19961210 19970309
59 178.00 -29.00 19961210 19970309
59 179.00 -29.00 19961210 19970309
59 177.00 -28.00 19961210 19970309
59 178.00 -28.00 19961210 19970309
59 177.00 -27.00 19961210 19970309
59 -178.00 -32.00 19961211 19970310
59 -179.00 -29.00 19961211 19970310
59 -178.00 -30.00 19961212 19970311
59 -178.00 -29.00 19961212 19970311
59 177.00 -26.00 19961212 19970311
59 178.00 -26.00 19961212 19970311
59 177.00 -25.00 19961212 19970311
59 178.00 -25.00 19961213 19970312
59 179.00 -25.00 19961213 19970312
59 177.00 -24.00 19961213 19970312
59 178.00 -24.00 19961213 19970312
59 -177.00 -32.00 19961226 19970325
59 -176.00 -33.00 19970124 19970423

Patch 60 of 3734, Core period: 20080128-20080501
60 -172.00 -33.00 20071109 20080206
60 -173.00 -34.00 20071118 20080215
60 -173.00 -33.00 20071123 20080220
60 176.00 -27.00 20071203 20080301
60 175.00 -26.00 20071203 20080301
60 176.00 -26.00 20071203 20080301
60 176.00 -29.00 20071204 20080302
60 176.00 -28.00 20071204 20080302
60 -174.00 -34.00 20071220 20080318
60 -176.00 -33.00 20071220 20080318
60 -175.00 -33.00 20071220 20080318
60 -175.00 -32.00 20080112 20080410
60 -174.00 -32.00 20080113 20080411
60 -176.00 -31.00 20080113 20080411
60 173.00 -24.00 20080127 20080425
60 171.00 -25.00 20080128 20080426
60 172.00 -25.00 20080128 20080426
60 173.00 -25.00 20080128 20080426
60 170.00 -24.00 20080128 20080426
60 171.00 -24.00 20080128 20080426
60 172.00 -24.00 20080128 20080426
60 175.00 -31.00 20080130 20080428
60 174.00 -28.00 20080130 20080428
60 175.00 -28.00 20080130 20080428
60 173.00 -27.00 20080130 20080428
60 174.00 -27.00 20080130 20080428
60 172.00 -26.00 20080130 20080428
60 173.00 -26.00 20080130 20080428
60 174.00 -26.00 20080130 20080428
60 -180.00 -30.00 20080131 20080429
60 175.00 -27.00 20080131 20080429
60 -180.00 -31.00 20080201 20080430
60 -179.00 -31.00 20080201 20080430
60 176.00 -31.00 20080201 20080430
60 177.00 -31.00 20080201 20080430
60 178.00 -31.00 20080201 20080430
60 179.00 -31.00 20080201 20080430
60 173.00 -30.00 20080201 20080430
60 174.00 -30.00 20080201 20080430
60 175.00 -30.00 20080201 20080430
60 176.00 -30.00 20080201 20080430
60 177.00 -30.00 20080201 20080430
60 178.00 -30.00 20080201 20080430
60 175.00 -29.00 20080201 20080430
60 -174.00 -33.00 20080202 20080501
60 -177.00 -32.00 20080202 20080501
60 -176.00 -32.00 20080202 20080501
60 -178.00 -31.00 20080202 20080501
60 -177.00 -31.00 20080202 20080501
60 -179.00 -30.00 20080202 20080501
60 -179.00 -32.00 20080203 20080502
60 172.00 -30.00 20080208 20080507
60 173.00 -32.00 20080210 20080509
60 174.00 -32.00 20080210 20080509
60 174.00 -31.00 20080220 20080519
60 173.00 -31.00 20080226 20080525

Patch 61 of 3734, Core period: 20131126-20140420
61 -179.00 -26.00 20131119 20140216
61 179.00 -26.00 20131119 20140216
61 -177.00 -30.00 20131125 20140222
61 -180.00 -28.00 20131125 20140222
61 -179.00 -28.00 20131125 20140222
61 179.00 -28.00 20131125 20140222
61 -179.00 -27.00 20131125 20140222
61 179.00 -27.00 20131125 20140222
61 -180.00 -26.00 20131125 20140222
61 -180.00 -25.00 20131125 20140222
61 179.00 -25.00 20131125 20140222
61 179.00 -24.00 20131125 20140222
61 -177.00 -29.00 20131126 20140223
61 -178.00 -29.00 20140120 20140419
61 -180.00 -27.00 20140120 20140419
61 -177.00 -31.00 20140209 20140509
61 -178.00 -30.00 20140209 20140509
61 -179.00 -29.00 20140209 20140509

Patch 62 of 3734, Core period: 20130226-20130604
62 -168.00 -34.00 20130209 20130509
62 -169.00 -33.00 20130209 20130509
62 -174.00 -28.00 20130213 20130513
62 -163.00 -33.00 20130214 20130514
62 -159.00 -35.00 20130216 20130516
62 -158.00 -35.00 20130216 20130516
62 -163.00 -36.00 20130221 20130521
62 -162.00 -36.00 20130221 20130521
62 -161.00 -36.00 20130221 20130521
62 -160.00 -36.00 20130221 20130521
62 -164.00 -35.00 20130221 20130521
62 -163.00 -35.00 20130221 20130521
62 -162.00 -35.00 20130221 20130521
62 -161.00 -35.00 20130221 20130521
62 -160.00 -35.00 20130221 20130521
62 -165.00 -34.00 20130221 20130521
62 -164.00 -34.00 20130221 20130521
62 -163.00 -34.00 20130221 20130521
62 -162.00 -34.00 20130221 20130521
62 -161.00 -34.00 20130221 20130521
62 -162.00 -33.00 20130222 20130522
62 -163.00 -32.00 20130222 20130522
62 -164.00 -36.00 20130225 20130525
62 -165.00 -38.00 20130226 20130526
62 -164.00 -38.00 20130226 20130526
62 -163.00 -38.00 20130226 20130526
62 -165.00 -37.00 20130226 20130526
62 -164.00 -37.00 20130226 20130526
62 -163.00 -37.00 20130226 20130526
62 -178.00 -26.00 20130303 20130531
62 -180.00 -25.00 20130303 20130531
62 -172.00 -33.00 20130304 20130601
62 -171.00 -33.00 20130304 20130601
62 -173.00 -32.00 20130304 20130601
62 -172.00 -32.00 20130304 20130601
62 -171.00 -32.00 20130304 20130601
62 -174.00 -31.00 20130304 20130601
62 -173.00 -31.00 20130304 20130601
62 -172.00 -31.00 20130304 20130601
62 -171.00 -31.00 20130304 20130601
62 -175.00 -30.00 20130304 20130601
62 -174.00 -30.00 20130304 20130601
62 -173.00 -30.00 20130304 20130601
62 -176.00 -29.00 20130304 20130601
62 -175.00 -29.00 20130304 20130601
62 -174.00 -29.00 20130304 20130601
62 -177.00 -28.00 20130304 20130601
62 -176.00 -28.00 20130304 20130601
62 -175.00 -28.00 20130304 20130601
62 -178.00 -27.00 20130304 20130601
62 -177.00 -27.00 20130304 20130601
62 -179.00 -26.00 20130304 20130601
62 -166.00 -37.00 20130305 20130602
62 -167.00 -36.00 20130305 20130602
62 -166.00 -36.00 20130305 20130602
62 -165.00 -36.00 20130305 20130602
62 -170.00 -35.00 20130305 20130602
62 -169.00 -35.00 20130305 20130602
62 -167.00 -35.00 20130305 20130602
62 -166.00 -35.00 20130305 20130602
62 -165.00 -35.00 20130305 20130602
62 -171.00 -34.00 20130305 20130602
62 -170.00 -34.00 20130305 20130602
62 -169.00 -34.00 20130305 20130602
62 -170.00 -33.00 20130305 20130602
62 -170.00 -32.00 20130305 20130602
62 179.00 -25.00 20130306 20130603
62 177.00 -24.00 20130306 20130603
62 -176.00 -30.00 20130307 20130604
62 -177.00 -29.00 20130307 20130604
62 -178.00 -28.00 20130307 20130604
62 -180.00 -26.00 20130307 20130604
62 -162.00 -32.00 20130312 20130609
62 178.00 -25.00 20130321 20130618
62 -157.00 -35.00 20130324 20130621
62 -157.00 -34.00 20130324 20130621
62 -170.00 -31.00 20130329 20130626
62 -174.00 -32.00 20130422 20130720
62 -175.00 -31.00 20130422 20130720
62 -175.00 -33.00 20130512 20130809
62 -174.00 -34.00 20130513 20130810
62 -173.00 -34.00 20130513 20130810
62 -176.00 -33.00 20130516 20130813
62 -172.00 -36.00 20130520 20130817
62 -174.00 -36.00 20130525 20130822
62 -173.00 -36.00 20130525 20130822
62 -173.00 -35.00 20130525 20130822
62 -172.00 -35.00 20130525 20130822
62 -172.00 -34.00 20130525 20130822

Patch 63 of 3734, Core period: 19811230-19820405
63 -180.00 -25.00 19811228 19820327
63 -179.00 -25.00 19811228 19820327
63 -178.00 -25.00 19811228 19820327
63 179.00 -25.00 19811228 19820327
63 -178.00 -24.00 19811228 19820327
63 178.00 -24.00 19811229 19820328
63 176.00 -23.00 19811230 19820329
63 177.00 -23.00 19811230 19820329
63 -179.00 -24.00 19820103 19820402
63 -180.00 -24.00 19820104 19820403
63 179.00 -24.00 19820104 19820403
63 178.00 -23.00 19820104 19820403
63 -180.00 -21.00 19820104 19820403
63 -180.00 -23.00 19820105 19820404
63 179.00 -23.00 19820105 19820404
63 -180.00 -22.00 19820105 19820404
63 178.00 -22.00 19820105 19820404
63 179.00 -22.00 19820105 19820404
63 178.00 -21.00 19820105 19820404
63 179.00 -21.00 19820105 19820404
63 178.00 -20.00 19820105 19820404
63 179.00 -20.00 19820105 19820404
63 178.00 -19.00 19820105 19820404

Patch 64 of 3734, Core period: 20180111-20180501
64 178.00 -19.00 20180109 20180408
64 -178.00 -24.00 20180110 20180409
64 -179.00 -22.00 20180110 20180409
64 -178.00 -22.00 20180110 20180409
64 -180.00 -21.00 20180110 20180409
64 -177.00 -21.00 20180110 20180409
64 -176.00 -21.00 20180110 20180409
64 -177.00 -20.00 20180110 20180409
64 -176.00 -20.00 20180110 20180409
64 179.00 -20.00 20180110 20180409
64 -179.00 -19.00 20180110 20180409
64 -176.00 -19.00 20180110 20180409
64 -175.00 -19.00 20180110 20180409
64 -178.00 -18.00 20180110 20180409
64 -177.00 -18.00 20180110 20180409
64 -177.00 -22.00 20180111 20180410
64 -179.00 -21.00 20180111 20180410
64 -178.00 -21.00 20180111 20180410
64 178.00 -22.00 20180131 20180430
64 178.00 -21.00 20180131 20180430
64 179.00 -21.00 20180131 20180430
64 178.00 -20.00 20180131 20180430
64 -180.00 -23.00 20180201 20180501
64 -179.00 -23.00 20180201 20180501
64 -178.00 -23.00 20180201 20180501
64 179.00 -23.00 20180201 20180501
64 -180.00 -22.00 20180201 20180501
64 179.00 -22.00 20180201 20180501

Patch 65 of 3734, Core period: 20101126-20110408
65 -173.00 -19.00 20101031 20110128
65 -172.00 -19.00 20101031 20110128
65 -172.00 -23.00 20101111 20110208
65 -173.00 -15.00 20101117 20110214
65 -176.00 -17.00 20101119 20110216
65 -175.00 -17.00 20101119 20110216
65 -174.00 -16.00 20101119 20110216
65 -173.00 -16.00 20101119 20110216
65 -175.00 -19.00 20101120 20110217
65 -174.00 -19.00 20101120 20110217
65 -175.00 -18.00 20101120 20110217
65 -174.00 -18.00 20101120 20110217
65 -176.00 -19.00 20101121 20110218
65 -176.00 -18.00 20101121 20110218
65 -177.00 -17.00 20101121 20110218
65 -176.00 -20.00 20101122 20110219
65 -177.00 -18.00 20101122 20110219
65 172.00 -17.00 20101123 20110220
65 171.00 -17.00 20101124 20110221
65 169.00 -16.00 20101124 20110221
65 170.00 -16.00 20101124 20110221
65 171.00 -16.00 20101124 20110221
65 174.00 -20.00 20101125 20110222
65 173.00 -19.00 20101125 20110222
65 174.00 -19.00 20101125 20110222
65 175.00 -19.00 20101125 20110222
65 172.00 -18.00 20101125 20110222
65 173.00 -18.00 20101125 20110222
65 174.00 -18.00 20101125 20110222
65 169.00 -17.00 20101125 20110222
65 170.00 -17.00 20101125 20110222
65 173.00 -22.00 20101126 20110223
65 174.00 -22.00 20101126 20110223
65 173.00 -21.00 20101126 20110223
65 174.00 -21.00 20101126 20110223
65 170.00 -18.00 20101126 20110223
65 170.00 -24.00 20101208 20110307
65 172.00 -22.00 20101208 20110307
65 172.00 -21.00 20101208 20110307
65 170.00 -19.00 20101208 20110307
65 169.00 -18.00 20101208 20110307
65 173.00 -24.00 20101209 20110308
65 174.00 -24.00 20101209 20110308
65 173.00 -23.00 20101209 20110308
65 174.00 -23.00 20101209 20110308
65 171.00 -18.00 20101212 20110311
65 168.00 -24.00 20101215 20110314
65 169.00 -24.00 20101215 20110314
65 171.00 -19.00 20101219 20110318
65 171.00 -23.00 20101220 20110319
65 172.00 -23.00 20101220 20110319
65 171.00 -22.00 20101220 20110319
65 170.00 -20.00 20101220 20110319
65 171.00 -25.00 20101222 20110321
65 -171.00 -24.00 20110103 20110402
65 170.00 -22.00 20110104 20110403
65 -177.00 -20.00 20110104 20110403
65 -177.00 -22.00 20110105 20110404
65 -180.00 -21.00 20110105 20110404
65 -179.00 -21.00 20110105 20110404
65 -178.00 -21.00 20110105 20110404
65 -177.00 -21.00 20110105 20110404
65 -180.00 -20.00 20110105 20110404
65 179.00 -20.00 20110105 20110404
65 -172.00 -24.00 20110106 20110405
65 -172.00 -26.00 20110107 20110406
65 -173.00 -25.00 20110107 20110406
65 -172.00 -25.00 20110107 20110406
65 -176.00 -24.00 20110107 20110406
65 -175.00 -24.00 20110107 20110406
65 -174.00 -24.00 20110107 20110406
65 -173.00 -24.00 20110107 20110406
65 -178.00 -23.00 20110107 20110406
65 -177.00 -23.00 20110107 20110406
65 -176.00 -23.00 20110107 20110406
65 -176.00 -22.00 20110107 20110406
65 -176.00 -21.00 20110107 20110406
65 171.00 -21.00 20110107 20110406
65 172.00 -20.00 20110107 20110406
65 173.00 -20.00 20110107 20110406
65 -171.00 -27.00 20110108 20110407
65 -171.00 -25.00 20110108 20110407
65 170.00 -21.00 20110108 20110407
65 171.00 -20.00 20110108 20110407
65 172.00 -19.00 20110108 20110407
65 175.00 -24.00 20110110 20110409
65 176.00 -24.00 20110110 20110409
65 175.00 -23.00 20110110 20110409
65 176.00 -23.00 20110110 20110409
65 -178.00 -22.00 20110110 20110409
65 179.00 -21.00 20110110 20110409
65 178.00 -20.00 20110110 20110409
65 177.00 -23.00 20110111 20110410
65 177.00 -21.00 20110111 20110410
65 178.00 -21.00 20110111 20110410
65 175.00 -20.00 20110111 20110410
65 176.00 -20.00 20110111 20110410
65 177.00 -22.00 20110112 20110411
65 178.00 -22.00 20110112 20110411
65 176.00 -22.00 20110205 20110505
65 176.00 -21.00 20110205 20110505
65 175.00 -21.00 20110217 20110517
65 177.00 -24.00 20110218 20110518
65 178.00 -28.00 20110306 20110603
65 177.00 -27.00 20110306 20110603
65 178.00 -27.00 20110306 20110603
65 177.00 -26.00 20110306 20110603
65 178.00 -26.00 20110307 20110604
65 177.00 -25.00 20110307 20110604
65 178.00 -25.00 20110307 20110604
65 -178.00 -24.00 20110308 20110605
65 -177.00 -24.00 20110308 20110605
65 179.00 -25.00 20110504 20110801

Patch 66 of 3734, Core period: 20120103-20120415
66 -167.00 -21.00 20111110 20120207
66 -180.00 -14.00 20111110 20120207
66 -180.00 -15.00 20111111 20120208
66 -178.00 -20.00 20111113 20120210
66 -177.00 -20.00 20111113 20120210
66 -176.00 -20.00 20111207 20120305
66 -169.00 -19.00 20111220 20120318
66 -168.00 -19.00 20111226 20120324
66 -176.00 -17.00 20111226 20120324
66 -167.00 -19.00 20111227 20120325
66 -173.00 -19.00 20120101 20120330
66 -171.00 -20.00 20120102 20120331
66 -170.00 -20.00 20120102 20120331
66 -169.00 -20.00 20120102 20120331
66 -168.00 -20.00 20120102 20120331
66 -172.00 -19.00 20120102 20120331
66 -171.00 -19.00 20120102 20120331
66 -170.00 -19.00 20120102 20120331
66 -177.00 -18.00 20120102 20120331
66 -176.00 -18.00 20120102 20120331
66 -175.00 -18.00 20120102 20120331
66 -174.00 -18.00 20120102 20120331
66 -178.00 -17.00 20120102 20120331
66 -177.00 -17.00 20120102 20120331
66 -178.00 -16.00 20120102 20120331
66 -179.00 -15.00 20120102 20120331
66 -170.00 -21.00 20120103 20120401
66 -169.00 -21.00 20120103 20120401
66 -168.00 -21.00 20120103 20120401
66 -176.00 -19.00 20120103 20120401
66 -175.00 -19.00 20120103 20120401
66 -174.00 -19.00 20120103 20120401
66 178.00 -17.00 20120104 20120402
66 177.00 -17.00 20120112 20120410
66 178.00 -16.00 20120112 20120410
66 -180.00 -20.00 20120116 20120414
66 -179.00 -20.00 20120116 20120414
66 179.00 -20.00 20120116 20120414
66 -180.00 -19.00 20120116 20120414
66 -179.00 -19.00 20120116 20120414
66 177.00 -19.00 20120116 20120414
66 178.00 -19.00 20120116 20120414
66 179.00 -19.00 20120116 20120414
66 177.00 -18.00 20120116 20120414
66 -180.00 -21.00 20120117 20120415
66 -179.00 -21.00 20120117 20120415
66 -178.00 -21.00 20120117 20120415
66 178.00 -20.00 20120117 20120415

Patch 67 of 3734, Core period: 20071204-20080329
67 -180.00 -19.00 20071111 20080208
67 -179.00 -19.00 20071111 20080208
67 178.00 -19.00 20071202 20080229
67 179.00 -19.00 20071202 20080229
67 179.00 -20.00 20071203 20080301
67 178.00 -20.00 20071229 20080327
67 173.00 -21.00 20071230 20080328
67 174.00 -21.00 20071230 20080328
67 173.00 -20.00 20071230 20080328
67 174.00 -20.00 20071230 20080328
67 175.00 -20.00 20071230 20080328
67 176.00 -20.00 20071230 20080328
67 177.00 -20.00 20071230 20080328
67 175.00 -19.00 20071230 20080328
67 176.00 -19.00 20071230 20080328
67 177.00 -19.00 20071230 20080328
67 174.00 -19.00 20071231 20080329
67 173.00 -19.00 20080101 20080330
67 173.00 -18.00 20080101 20080330

Patch 68 of 3734, Core period: 20081231-20090401
68 179.00 -18.00 20081217 20090316
68 178.00 -17.00 20081221 20090320
68 -179.00 -18.00 20081222 20090321
68 -180.00 -18.00 20081226 20090325
68 175.00 -20.00 20081230 20090329
68 173.00 -18.00 20081230 20090329
68 176.00 -20.00 20081231 20090330
68 177.00 -20.00 20081231 20090330
68 178.00 -20.00 20090101 20090331
68 175.00 -19.00 20090101 20090331
68 176.00 -19.00 20090101 20090331
68 177.00 -19.00 20090101 20090331
68 178.00 -19.00 20090101 20090331
68 174.00 -18.00 20090101 20090331
68 175.00 -18.00 20090101 20090331
68 176.00 -18.00 20090101 20090331
68 177.00 -18.00 20090101 20090331
68 178.00 -18.00 20090101 20090331
68 177.00 -17.00 20090101 20090331

Patch 69 of 3734, Core period: 19901214-19910315
69 -170.00 -17.00 19901209 19910308
69 -168.00 -19.00 19901210 19910309
69 -179.00 -15.00 19901211 19910310
69 -178.00 -15.00 19901211 19910310
69 -177.00 -15.00 19901211 19910310
69 -176.00 -15.00 19901211 19910310
69 -175.00 -15.00 19901211 19910310
69 -180.00 -14.00 19901211 19910310
69 -179.00 -16.00 19901212 19910311
69 179.00 -16.00 19901212 19910311
69 -180.00 -15.00 19901212 19910311
69 -171.00 -19.00 19901213 19910312
69 -170.00 -19.00 19901213 19910312
69 -169.00 -19.00 19901213 19910312
69 -172.00 -18.00 19901213 19910312
69 -171.00 -18.00 19901213 19910312
69 -170.00 -18.00 19901213 19910312
69 -174.00 -17.00 19901213 19910312
69 -173.00 -17.00 19901213 19910312
69 -172.00 -17.00 19901213 19910312
69 -171.00 -17.00 19901213 19910312
69 -175.00 -16.00 19901213 19910312
69 -174.00 -16.00 19901213 19910312
69 -177.00 -19.00 19901214 19910313
69 -176.00 -19.00 19901214 19910313
69 -177.00 -18.00 19901214 19910313
69 -178.00 -17.00 19901214 19910313
69 -177.00 -17.00 19901214 19910313
69 -176.00 -17.00 19901214 19910313
69 -175.00 -17.00 19901214 19910313
69 -178.00 -16.00 19901214 19910313
69 -177.00 -16.00 19901214 19910313
69 -176.00 -16.00 19901214 19910313
69 179.00 -14.00 19901214 19910313
69 179.00 -13.00 19901214 19910313
69 -176.00 -20.00 19901215 19910314
69 -179.00 -19.00 19901215 19910314
69 -178.00 -19.00 19901215 19910314
69 -180.00 -18.00 19901215 19910314
69 -179.00 -18.00 19901215 19910314
69 -178.00 -18.00 19901215 19910314
69 178.00 -17.00 19901215 19910314
69 179.00 -17.00 19901215 19910314
69 178.00 -16.00 19901215 19910314
69 178.00 -14.00 19901215 19910314
69 178.00 -13.00 19901215 19910314
69 -174.00 -18.00 19901216 19910315
69 -173.00 -18.00 19901216 19910315

Patch 70 of 3734, Core period: 19881129-19890314
70 166.00 -11.00 19881025 19890122
70 167.00 -11.00 19881025 19890122
70 161.00 -26.00 19881030 19890127
70 162.00 -26.00 19881030 19890127
70 161.00 -25.00 19881030 19890127
70 162.00 -25.00 19881030 19890127
70 160.00 -24.00 19881030 19890127
70 161.00 -24.00 19881030 19890127
70 164.00 -27.00 19881031 19890128
70 163.00 -26.00 19881031 19890128
70 165.00 -21.00 19881102 19890130
70 161.00 -22.00 19881119 19890216
70 162.00 -22.00 19881119 19890216
70 162.00 -21.00 19881119 19890216
70 161.00 -20.00 19881119 19890216
70 162.00 -20.00 19881119 19890216
70 165.00 -20.00 19881119 19890216
70 161.00 -19.00 19881119 19890216
70 162.00 -19.00 19881119 19890216
70 163.00 -19.00 19881119 19890216
70 164.00 -19.00 19881119 19890216
70 165.00 -19.00 19881119 19890216
70 162.00 -18.00 19881119 19890216
70 163.00 -18.00 19881119 19890216
70 164.00 -18.00 19881119 19890216
70 161.00 -23.00 19881120 19890217
70 163.00 -21.00 19881120 19890217
70 164.00 -21.00 19881120 19890217
70 163.00 -20.00 19881120 19890217
70 165.00 -14.00 19881122 19890219
70 166.00 -14.00 19881122 19890219
70 163.00 -13.00 19881122 19890219
70 164.00 -13.00 19881123 19890220
70 162.00 -12.00 19881123 19890220
70 166.00 -16.00 19881127 19890224
70 165.00 -15.00 19881127 19890224
70 164.00 -14.00 19881127 19890224
70 170.00 -13.00 19881127 19890224
70 169.00 -12.00 19881127 19890224
70 170.00 -12.00 19881127 19890224
70 171.00 -12.00 19881127 19890224
70 169.00 -19.00 19881128 19890225
70 167.00 -18.00 19881128 19890225
70 168.00 -18.00 19881128 19890225
70 168.00 -17.00 19881128 19890225
70 167.00 -16.00 19881128 19890225
70 168.00 -16.00 19881128 19890225
70 169.00 -16.00 19881128 19890225
70 166.00 -15.00 19881128 19890225
70 167.00 -15.00 19881128 19890225
70 168.00 -15.00 19881128 19890225
70 169.00 -15.00 19881128 19890225
70 167.00 -14.00 19881128 19890225
70 165.00 -13.00 19881128 19890225
70 170.00 -16.00 19881129 19890226
70 170.00 -15.00 19881129 19890226
70 168.00 -14.00 19881129 19890226
70 166.00 -13.00 19881129 19890226
70 167.00 -13.00 19881129 19890226
70 169.00 -13.00 19881129 19890226
70 163.00 -12.00 19881129 19890226
70 164.00 -12.00 19881129 19890226
70 165.00 -12.00 19881129 19890226
70 166.00 -12.00 19881129 19890226
70 176.00 -12.00 19881129 19890226
70 162.00 -11.00 19881129 19890226
70 163.00 -11.00 19881129 19890226
70 164.00 -11.00 19881129 19890226
70 165.00 -11.00 19881129 19890226
70 162.00 -10.00 19881129 19890226
70 163.00 -10.00 19881129 19890226
70 169.00 -14.00 19881130 19890227
70 170.00 -14.00 19881130 19890227
70 168.00 -13.00 19881130 19890227
70 171.00 -13.00 19881130 19890227
70 167.00 -12.00 19881130 19890227
70 168.00 -12.00 19881130 19890227
70 167.00 -22.00 19881201 19890228
70 168.00 -22.00 19881201 19890228
70 166.00 -21.00 19881201 19890228
70 167.00 -21.00 19881201 19890228
70 168.00 -21.00 19881201 19890228
70 169.00 -21.00 19881201 19890228
70 166.00 -20.00 19881201 19890228
70 167.00 -20.00 19881201 19890228
70 168.00 -20.00 19881201 19890228
70 169.00 -20.00 19881201 19890228
70 170.00 -20.00 19881201 19890228
70 166.00 -19.00 19881201 19890228
70 167.00 -19.00 19881201 19890228
70 168.00 -19.00 19881201 19890228
70 166.00 -18.00 19881201 19890228
70 174.00 -13.00 19881201 19890228
70 166.00 -22.00 19881202 19890301
70 169.00 -22.00 19881202 19890301
70 -180.00 -12.00 19881207 19890306
70 177.00 -12.00 19881207 19890306
70 178.00 -12.00 19881207 19890306
70 179.00 -12.00 19881207 19890306
70 175.00 -13.00 19881208 19890307
70 175.00 -14.00 19881209 19890308
70 172.00 -14.00 19881210 19890309
70 173.00 -14.00 19881210 19890309
70 174.00 -14.00 19881210 19890309
70 179.00 -16.00 19881211 19890310
70 -180.00 -15.00 19881211 19890310
70 -179.00 -15.00 19881211 19890310
70 176.00 -16.00 19881212 19890311
70 177.00 -16.00 19881212 19890311
70 178.00 -16.00 19881212 19890311
70 174.00 -15.00 19881212 19890311
70 175.00 -15.00 19881212 19890311
70 176.00 -15.00 19881212 19890311
70 -180.00 -14.00 19881212 19890311
70 171.00 -14.00 19881212 19890311
70 172.00 -17.00 19881213 19890312
70 173.00 -17.00 19881213 19890312
70 174.00 -17.00 19881213 19890312
70 175.00 -17.00 19881213 19890312
70 176.00 -17.00 19881213 19890312
70 177.00 -17.00 19881213 19890312
70 178.00 -17.00 19881213 19890312
70 171.00 -16.00 19881213 19890312
70 172.00 -16.00 19881213 19890312
70 173.00 -16.00 19881213 19890312
70 174.00 -16.00 19881213 19890312
70 175.00 -16.00 19881213 19890312
70 171.00 -15.00 19881213 19890312
70 172.00 -15.00 19881213 19890312
70 173.00 -15.00 19881213 19890312
70 174.00 -20.00 19881214 19890313
70 175.00 -20.00 19881214 19890313
70 176.00 -20.00 19881214 19890313
70 174.00 -19.00 19881214 19890313
70 175.00 -19.00 19881214 19890313
70 173.00 -18.00 19881214 19890313
70 174.00 -18.00 19881214 19890313
70 175.00 -18.00 19881214 19890313
70 167.00 -24.00 19881215 19890314
70 168.00 -23.00 19881215 19890314
70 168.00 -24.00 19881218 19890317
70 169.00 -24.00 19881218 19890317
70 174.00 -22.00 19881221 19890320
70 175.00 -22.00 19881221 19890320
70 176.00 -22.00 19881221 19890320
70 174.00 -21.00 19881221 19890320
70 175.00 -21.00 19881221 19890320
70 -179.00 -16.00 19890106 19890405
70 -178.00 -16.00 19890106 19890405
70 -175.00 -19.00 19890108 19890407
70 -176.00 -18.00 19890108 19890407
70 -176.00 -19.00 19890109 19890408
70 -177.00 -18.00 19890109 19890408
70 -178.00 -17.00 19890109 19890408
70 -177.00 -17.00 19890109 19890408
70 162.00 -16.00 19890109 19890408
70 163.00 -16.00 19890109 19890408
70 166.00 -23.00 19890110 19890409
70 167.00 -23.00 19890110 19890409
70 -179.00 -18.00 19890110 19890409
70 -178.00 -18.00 19890110 19890409
70 -180.00 -17.00 19890110 19890409
70 -179.00 -17.00 19890110 19890409
70 162.00 -17.00 19890110 19890409
70 163.00 -17.00 19890110 19890409
70 179.00 -17.00 19890110 19890409
70 -180.00 -16.00 19890110 19890409
70 165.00 -18.00 19890111 19890410
70 164.00 -17.00 19890111 19890410
70 165.00 -17.00 19890111 19890410
70 166.00 -17.00 19890111 19890410
70 164.00 -16.00 19890111 19890410
70 165.00 -16.00 19890111 19890410
70 163.00 -15.00 19890112 19890411
70 164.00 -15.00 19890112 19890411

Patch 71 of 3734, Core period: 20071105-20080328
71 -168.00 -16.00 20070925 20071223
71 -157.00 -16.00 20071007 20080104
71 -177.00 -15.00 20071019 20080116
71 -177.00 -16.00 20071021 20080118
71 -165.00 -13.00 20071026 20080123
71 -165.00 -12.00 20071026 20080123
71 -169.00 -11.00 20071026 20080123
71 -167.00 -11.00 20071026 20080123
71 -166.00 -11.00 20071026 20080123
71 -169.00 -10.00 20071026 20080123
71 -168.00 -10.00 20071026 20080123
71 -167.00 -16.00 20071027 20080124
71 -166.00 -16.00 20071027 20080124
71 -165.00 -16.00 20071027 20080124
71 -168.00 -15.00 20071027 20080124
71 -167.00 -15.00 20071027 20080124
71 -166.00 -15.00 20071027 20080124
71 -168.00 -14.00 20071027 20080124
71 -167.00 -14.00 20071027 20080124
71 -166.00 -14.00 20071027 20080124
71 -167.00 -13.00 20071027 20080124
71 -166.00 -13.00 20071027 20080124
71 -167.00 -12.00 20071027 20080124
71 -168.00 -11.00 20071027 20080124
71 -173.00 -17.00 20071028 20080125
71 -172.00 -17.00 20071028 20080125
71 -171.00 -17.00 20071028 20080125
71 -170.00 -17.00 20071028 20080125
71 -174.00 -16.00 20071028 20080125
71 -173.00 -16.00 20071028 20080125
71 -172.00 -16.00 20071028 20080125
71 -171.00 -16.00 20071028 20080125
71 -170.00 -16.00 20071028 20080125
71 -169.00 -16.00 20071028 20080125
71 -174.00 -15.00 20071028 20080125
71 -173.00 -15.00 20071028 20080125
71 -172.00 -15.00 20071028 20080125
71 -169.00 -15.00 20071028 20080125
71 -173.00 -14.00 20071028 20080125
71 -171.00 -14.00 20071028 20080125
71 -169.00 -14.00 20071028 20080125
71 -164.00 -13.00 20071028 20080125
71 -166.00 -12.00 20071028 20080125
71 -173.00 -11.00 20071028 20080125
71 -173.00 -10.00 20071028 20080125
71 -176.00 -16.00 20071029 20080126
71 -176.00 -15.00 20071029 20080126
71 -175.00 -15.00 20071029 20080126
71 -176.00 -14.00 20071029 20080126
71 -175.00 -14.00 20071029 20080126
71 -174.00 -14.00 20071029 20080126
71 179.00 -15.00 20071031 20080128
71 179.00 -14.00 20071031 20080128
71 -161.00 -16.00 20071104 20080201
71 -180.00 -15.00 20071104 20080201
71 -179.00 -15.00 20071104 20080201
71 -180.00 -14.00 20071104 20080201
71 -179.00 -14.00 20071104 20080201
71 -178.00 -14.00 20071104 20080201
71 -180.00 -13.00 20071104 20080201
71 -179.00 -13.00 20071104 20080201
71 -178.00 -13.00 20071104 20080201
71 174.00 -13.00 20071104 20080201
71 175.00 -13.00 20071104 20080201
71 176.00 -13.00 20071104 20080201
71 179.00 -13.00 20071104 20080201
71 -180.00 -12.00 20071104 20080201
71 -179.00 -12.00 20071104 20080201
71 174.00 -12.00 20071104 20080201
71 175.00 -12.00 20071104 20080201
71 176.00 -12.00 20071104 20080201
71 177.00 -12.00 20071104 20080201
71 178.00 -12.00 20071104 20080201
71 179.00 -12.00 20071104 20080201
71 175.00 -11.00 20071104 20080201
71 176.00 -11.00 20071104 20080201
71 174.00 -10.00 20071104 20080201
71 178.00 -16.00 20071105 20080202
71 179.00 -16.00 20071105 20080202
71 -161.00 -15.00 20071105 20080202
71 -160.00 -15.00 20071105 20080202
71 176.00 -15.00 20071105 20080202
71 177.00 -15.00 20071105 20080202
71 178.00 -15.00 20071105 20080202
71 174.00 -14.00 20071105 20080202
71 175.00 -14.00 20071105 20080202
71 176.00 -14.00 20071105 20080202
71 177.00 -14.00 20071105 20080202
71 178.00 -14.00 20071105 20080202
71 177.00 -13.00 20071105 20080202
71 178.00 -13.00 20071105 20080202
71 174.00 -11.00 20071105 20080202
71 -165.00 -17.00 20071106 20080203
71 -164.00 -16.00 20071106 20080203
71 -160.00 -16.00 20071106 20080203
71 -159.00 -16.00 20071106 20080203
71 -158.00 -16.00 20071106 20080203
71 -162.00 -15.00 20071106 20080203
71 -164.00 -17.00 20071107 20080204
71 -158.00 -15.00 20071107 20080204
71 -163.00 -14.00 20071109 20080206
71 -161.00 -19.00 20071110 20080207
71 -160.00 -19.00 20071110 20080207
71 -174.00 -18.00 20071110 20080207
71 -162.00 -14.00 20071110 20080207
71 -176.00 -17.00 20071111 20080208
71 -163.00 -17.00 20071112 20080209
71 -163.00 -15.00 20071113 20080210
71 170.00 -12.00 20071114 20080211
71 -161.00 -17.00 20071115 20080212
71 -160.00 -17.00 20071115 20080212
71 -163.00 -16.00 20071115 20080212
71 -164.00 -15.00 20071115 20080212
71 -164.00 -14.00 20071115 20080212
71 171.00 -12.00 20071115 20080212
71 172.00 -12.00 20071115 20080212
71 173.00 -12.00 20071115 20080212
71 166.00 -11.00 20071115 20080212
71 171.00 -11.00 20071115 20080212
71 172.00 -11.00 20071115 20080212
71 173.00 -11.00 20071115 20080212
71 166.00 -10.00 20071115 20080212
71 167.00 -10.00 20071115 20080212
71 171.00 -10.00 20071115 20080212
71 172.00 -10.00 20071115 20080212
71 173.00 -10.00 20071115 20080212
71 165.00 -9.00 20071115 20080212
71 166.00 -9.00 20071115 20080212
71 170.00 -9.00 20071115 20080212
71 -165.00 -15.00 20071116 20080213
71 -165.00 -14.00 20071116 20080213
71 169.00 -11.00 20071116 20080213
71 170.00 -11.00 20071116 20080213
71 168.00 -10.00 20071116 20080213
71 169.00 -10.00 20071116 20080213
71 170.00 -10.00 20071116 20080213
71 167.00 -9.00 20071116 20080213
71 168.00 -9.00 20071116 20080213
71 169.00 -9.00 20071116 20080213
71 -172.00 -11.00 20071119 20080216
71 -171.00 -11.00 20071119 20080216
71 -170.00 -11.00 20071119 20080216
71 -162.00 -17.00 20071120 20080217
71 -167.00 -10.00 20071120 20080217
71 -162.00 -16.00 20071121 20080218
71 -163.00 -20.00 20071124 20080221
71 -163.00 -19.00 20071124 20080221
71 -162.00 -19.00 20071124 20080221
71 -164.00 -18.00 20071124 20080221
71 -163.00 -18.00 20071124 20080221
71 -162.00 -18.00 20071124 20080221
71 -160.00 -18.00 20071124 20080221
71 -162.00 -21.00 20071125 20080222
71 -161.00 -21.00 20071125 20080222
71 -162.00 -20.00 20071125 20080222
71 -161.00 -20.00 20071125 20080222
71 -164.00 -20.00 20071209 20080307
71 -163.00 -21.00 20071211 20080309
71 165.00 -12.00 20071215 20080313
71 -167.00 -26.00 20071229 20080327
71 -166.00 -26.00 20071229 20080327
71 -168.00 -25.00 20071229 20080327
71 -167.00 -25.00 20071229 20080327
71 -169.00 -24.00 20071229 20080327
71 -168.00 -24.00 20071229 20080327
71 -170.00 -23.00 20071229 20080327
71 -176.00 -22.00 20071229 20080327
71 -174.00 -22.00 20071229 20080327
71 -173.00 -22.00 20071229 20080327
71 -175.00 -21.00 20071229 20080327
71 -174.00 -21.00 20071229 20080327
71 -176.00 -20.00 20071229 20080327
71 -175.00 -20.00 20071229 20080327
71 -167.00 -24.00 20071230 20080328
71 -169.00 -23.00 20071230 20080328
71 -168.00 -23.00 20071230 20080328
71 -167.00 -23.00 20071230 20080328
71 -172.00 -22.00 20071230 20080328
71 -171.00 -22.00 20071230 20080328
71 -170.00 -22.00 20071230 20080328
71 -169.00 -22.00 20071230 20080328
71 -168.00 -22.00 20071230 20080328
71 -167.00 -22.00 20071230 20080328
71 -173.00 -21.00 20071230 20080328
71 -172.00 -21.00 20071230 20080328
71 -171.00 -21.00 20071230 20080328
71 -170.00 -21.00 20071230 20080328
71 -169.00 -21.00 20071230 20080328
71 -174.00 -20.00 20071230 20080328
71 -173.00 -20.00 20071230 20080328
71 -172.00 -20.00 20071230 20080328
71 -171.00 -20.00 20071230 20080328
71 -170.00 -20.00 20071230 20080328
71 -175.00 -19.00 20071230 20080328
71 -174.00 -19.00 20071230 20080328
71 -173.00 -19.00 20071230 20080328
71 -172.00 -19.00 20071230 20080328
71 -171.00 -19.00 20071230 20080328
71 -166.00 -23.00 20071231 20080329
71 -165.00 -23.00 20071231 20080329
71 -166.00 -22.00 20071231 20080329
71 -165.00 -22.00 20071231 20080329
71 -168.00 -21.00 20071231 20080329
71 -167.00 -21.00 20071231 20080329
71 -166.00 -21.00 20071231 20080329
71 -169.00 -20.00 20071231 20080329
71 -168.00 -20.00 20071231 20080329
71 -170.00 -19.00 20071231 20080329
71 -164.00 -23.00 20080101 20080330
71 -164.00 -22.00 20080101 20080330
71 -165.00 -21.00 20080101 20080330
71 -163.00 -22.00 20080102 20080331
71 -164.00 -21.00 20080102 20080331
71 -168.00 -26.00 20080104 20080402
71 -165.00 -26.00 20080105 20080403
71 -165.00 -25.00 20080106 20080404
71 -166.00 -24.00 20080106 20080404
71 -165.00 -24.00 20080106 20080404
71 -163.00 -26.00 20080107 20080405
71 -162.00 -26.00 20080107 20080405
71 -164.00 -25.00 20080107 20080405
71 -163.00 -25.00 20080107 20080405
71 -164.00 -24.00 20080107 20080405

Patch 72 of 3734, Core period: 20111228-20120402
72 -167.00 -21.00 20111110 20120207
72 -180.00 -14.00 20111110 20120207
72 -180.00 -15.00 20111111 20120208
72 179.00 -14.00 20111112 20120209
72 -178.00 -20.00 20111113 20120210
72 -177.00 -20.00 20111113 20120210
72 -176.00 -20.00 20111207 20120305
72 -169.00 -19.00 20111220 20120318
72 -168.00 -19.00 20111226 20120324
72 -176.00 -17.00 20111226 20120324
72 -167.00 -19.00 20111227 20120325
72 -173.00 -19.00 20120101 20120330
72 -171.00 -20.00 20120102 20120331
72 -170.00 -20.00 20120102 20120331
72 -169.00 -20.00 20120102 20120331
72 -168.00 -20.00 20120102 20120331
72 -172.00 -19.00 20120102 20120331
72 -171.00 -19.00 20120102 20120331
72 -170.00 -19.00 20120102 20120331
72 -177.00 -18.00 20120102 20120331
72 -176.00 -18.00 20120102 20120331
72 -175.00 -18.00 20120102 20120331
72 -174.00 -18.00 20120102 20120331
72 -178.00 -17.00 20120102 20120331
72 -177.00 -17.00 20120102 20120331
72 -178.00 -16.00 20120102 20120331
72 -179.00 -15.00 20120102 20120331
72 -170.00 -21.00 20120103 20120401
72 -169.00 -21.00 20120103 20120401
72 -168.00 -21.00 20120103 20120401
72 -176.00 -19.00 20120103 20120401
72 -175.00 -19.00 20120103 20120401
72 -174.00 -19.00 20120103 20120401
72 -180.00 -20.00 20120116 20120414
72 -179.00 -20.00 20120116 20120414
72 -180.00 -19.00 20120116 20120414
72 -179.00 -19.00 20120116 20120414
72 -180.00 -21.00 20120117 20120415
72 -179.00 -21.00 20120117 20120415
72 -178.00 -21.00 20120117 20120415

Patch 73 of 3734, Core period: 19841219-19850319
73 -179.00 -15.00 19841218 19850317
73 -178.00 -15.00 19841218 19850317
73 -177.00 -15.00 19841218 19850317
73 -180.00 -14.00 19841218 19850317
73 -179.00 -14.00 19841218 19850317
73 -178.00 -14.00 19841218 19850317
73 179.00 -14.00 19841218 19850317
73 -180.00 -13.00 19841219 19850318
73 -179.00 -13.00 19841219 19850318
73 -179.00 -12.00 19841222 19850321
73 -180.00 -12.00 19841223 19850322

Patch 74 of 3734, Core period: 20161128-20170303
74 176.00 -13.00 20161015 20170112
74 177.00 -12.00 20161127 20170224
74 178.00 -12.00 20161127 20170224
74 179.00 -12.00 20161127 20170224
74 179.00 -15.00 20161202 20170301
74 -180.00 -14.00 20161202 20170301
74 179.00 -14.00 20161202 20170301
74 -180.00 -13.00 20161202 20170301
74 179.00 -13.00 20161202 20170301
74 176.00 -11.00 20161203 20170302
74 176.00 -12.00 20161204 20170303
74 178.00 -16.00 20161208 20170307
74 -180.00 -12.00 20170106 20170405

Patch 75 of 3734, Core period: 20171113-20180220
75 179.00 -13.00 20171111 20180208
75 -177.00 -15.00 20171112 20180209
75 -180.00 -14.00 20171112 20180209
75 -179.00 -14.00 20171112 20180209
75 -178.00 -14.00 20171112 20180209
75 -177.00 -14.00 20171112 20180209
75 -176.00 -14.00 20171112 20180209
75 178.00 -12.00 20171112 20180209
75 -178.00 -13.00 20171118 20180215
75 -179.00 -12.00 20171118 20180215
75 179.00 -12.00 20171119 20180216
75 177.00 -11.00 20171119 20180216
75 178.00 -11.00 20171119 20180216
75 179.00 -11.00 20171119 20180216
75 -179.00 -10.00 20171119 20180216
75 179.00 -10.00 20171119 20180216
75 -180.00 -12.00 20171121 20180218
75 -180.00 -11.00 20171121 20180218
75 -179.00 -11.00 20171121 20180218
75 175.00 -11.00 20171122 20180219
75 176.00 -11.00 20171122 20180219
75 -180.00 -10.00 20171122 20180219
75 174.00 -10.00 20171122 20180219
75 175.00 -10.00 20171122 20180219
75 176.00 -10.00 20171122 20180219
75 -177.00 -11.00 20171126 20180223
75 -178.00 -11.00 20171128 20180225
75 -178.00 -10.00 20171128 20180225
75 -177.00 -10.00 20171128 20180225
75 177.00 -10.00 20171207 20180306

Patch 76 of 3734, Core period: 20161128-20170303
76 176.00 -13.00 20161015 20170112
76 177.00 -12.00 20161127 20170224
76 178.00 -12.00 20161127 20170224
76 179.00 -12.00 20161127 20170224
76 -180.00 -14.00 20161202 20170301
76 179.00 -14.00 20161202 20170301
76 -180.00 -13.00 20161202 20170301
76 179.00 -13.00 20161202 20170301
76 176.00 -11.00 20161203 20170302
76 176.00 -12.00 20161204 20170303
76 -180.00 -12.00 20170106 20170405

Patch 77 of 3734, Core period: 20051125-20060301
77 -174.00 -14.00 20051115 20060212
77 -173.00 -14.00 20051115 20060212
77 -176.00 -13.00 20051116 20060213
77 -176.00 -17.00 20051121 20060218
77 -176.00 -16.00 20051121 20060218
77 -174.00 -16.00 20051121 20060218
77 -174.00 -15.00 20051121 20060218
77 -176.00 -14.00 20051121 20060218
77 -175.00 -14.00 20051121 20060218
77 -178.00 -14.00 20051122 20060219
77 -168.00 -18.00 20051123 20060220
77 -166.00 -20.00 20051124 20060221
77 -165.00 -20.00 20051124 20060221
77 -164.00 -20.00 20051124 20060221
77 -168.00 -19.00 20051124 20060221
77 -167.00 -19.00 20051124 20060221
77 -166.00 -19.00 20051124 20060221
77 -165.00 -19.00 20051124 20060221
77 -164.00 -19.00 20051124 20060221
77 -167.00 -18.00 20051124 20060221
77 -166.00 -18.00 20051124 20060221
77 -165.00 -18.00 20051124 20060221
77 -164.00 -18.00 20051124 20060221
77 -168.00 -17.00 20051124 20060221
77 -167.00 -17.00 20051124 20060221
77 -166.00 -17.00 20051124 20060221
77 -165.00 -17.00 20051124 20060221
77 -168.00 -16.00 20051124 20060221
77 -167.00 -16.00 20051124 20060221
77 -166.00 -16.00 20051124 20060221
77 -169.00 -15.00 20051124 20060221
77 -168.00 -15.00 20051124 20060221
77 -170.00 -14.00 20051124 20060221
77 -169.00 -14.00 20051124 20060221
77 -170.00 -19.00 20051125 20060222
77 -169.00 -19.00 20051125 20060222
77 -170.00 -18.00 20051125 20060222
77 -169.00 -18.00 20051125 20060222
77 -170.00 -17.00 20051125 20060222
77 -169.00 -17.00 20051125 20060222
77 -170.00 -16.00 20051125 20060222
77 -173.00 -15.00 20051125 20060222
77 -178.00 -12.00 20051125 20060222
77 -178.00 -11.00 20051125 20060222
77 -177.00 -11.00 20051125 20060222
77 -171.00 -19.00 20051126 20060223
77 -175.00 -17.00 20051126 20060223
77 -175.00 -16.00 20051126 20060223
77 -173.00 -16.00 20051126 20060223
77 -175.00 -15.00 20051126 20060223
77 -171.00 -15.00 20051126 20060223
77 -171.00 -14.00 20051126 20060223
77 -172.00 -17.00 20051127 20060224
77 -171.00 -17.00 20051127 20060224
77 -172.00 -16.00 20051127 20060224
77 -171.00 -16.00 20051127 20060224
77 -172.00 -15.00 20051127 20060224
77 -169.00 -16.00 20051128 20060225
77 -170.00 -15.00 20051128 20060225
77 176.00 -12.00 20051129 20060226
77 176.00 -11.00 20051129 20060226
77 177.00 -12.00 20051201 20060228
77 175.00 -11.00 20051202 20060301
77 -177.00 -14.00 20051219 20060318
77 -179.00 -13.00 20051219 20060318
77 -178.00 -13.00 20051219 20060318
77 -177.00 -15.00 20051220 20060319
77 -176.00 -15.00 20051220 20060319
77 -166.00 -21.00 20051223 20060322
77 -165.00 -21.00 20051224 20060323
77 -180.00 -12.00 20051226 20060325
77 -179.00 -12.00 20051226 20060325
77 178.00 -12.00 20051226 20060325
77 179.00 -12.00 20051226 20060325
77 172.00 -10.00 20051226 20060325
77 174.00 -10.00 20051226 20060325
77 -173.00 -19.00 20051227 20060326
77 -172.00 -19.00 20051227 20060326
77 -174.00 -18.00 20051227 20060326
77 171.00 -10.00 20051227 20060326
77 174.00 -11.00 20060107 20060406
77 173.00 -10.00 20060107 20060406

Patch 78 of 3734, Core period: 20121108-20130221
78 -177.00 -14.00 20121104 20130201
78 -176.00 -14.00 20121104 20130201
78 -175.00 -14.00 20121104 20130201
78 -174.00 -14.00 20121104 20130201
78 -178.00 -13.00 20121104 20130201
78 -176.00 -13.00 20121104 20130201
78 -175.00 -13.00 20121104 20130201
78 -174.00 -13.00 20121106 20130203
78 -173.00 -13.00 20121106 20130203
78 -180.00 -12.00 20121106 20130203
78 -179.00 -12.00 20121106 20130203
78 -178.00 -12.00 20121106 20130203
78 -177.00 -12.00 20121106 20130203
78 -176.00 -12.00 20121107 20130204
78 -175.00 -12.00 20121107 20130204
78 -174.00 -12.00 20121107 20130204
78 -173.00 -14.00 20121108 20130205
78 -173.00 -12.00 20121108 20130205
78 -171.00 -12.00 20121108 20130205
78 -176.00 -11.00 20121108 20130205
78 -175.00 -11.00 20121108 20130205
78 -174.00 -11.00 20121108 20130205
78 -175.00 -15.00 20121109 20130206
78 -171.00 -13.00 20121109 20130206
78 -170.00 -13.00 20121109 20130206
78 -172.00 -12.00 20121109 20130206
78 -170.00 -12.00 20121109 20130206
78 -176.00 -15.00 20121110 20130207
78 -177.00 -15.00 20121111 20130208
78 -175.00 -10.00 20121111 20130208
78 -174.00 -10.00 20121115 20130212
78 -169.00 -10.00 20121121 20130218
78 -171.00 -10.00 20121122 20130219
78 -170.00 -10.00 20121122 20130219
78 -173.00 -11.00 20121123 20130220
78 -172.00 -11.00 20121123 20130220
78 -173.00 -10.00 20121123 20130220
78 -172.00 -10.00 20121123 20130220
78 -176.00 -9.00 20121123 20130220
78 -175.00 -9.00 20121123 20130220
78 -174.00 -9.00 20121123 20130220
78 -172.00 -15.00 20121211 20130310
78 -171.00 -14.00 20121211 20130310
78 -170.00 -14.00 20121211 20130310
78 -177.00 -11.00 20121213 20130312
78 -172.00 -16.00 20121224 20130323
78 -171.00 -16.00 20121224 20130323
78 -178.00 -18.00 20121231 20130330
78 -177.00 -18.00 20121231 20130330
78 -176.00 -18.00 20130101 20130331
78 -178.00 -17.00 20130101 20130331
78 -177.00 -17.00 20130101 20130331
78 -176.00 -17.00 20130101 20130331
78 -178.00 -16.00 20130101 20130331

Patch 79 of 3734, Core period: 19821216-19830513
79 -157.00 -11.00 19820913 19821211
79 -156.00 -11.00 19820915 19821213
79 -85.00 2.00 19821014 19830111
79 -84.00 2.00 19821014 19830111
79 -83.00 2.00 19821014 19830111
79 -85.00 3.00 19821014 19830111
79 -86.00 2.00 19821015 19830112
79 -162.00 -1.00 19821022 19830119
79 -128.00 -20.00 19821023 19830120
79 -129.00 -19.00 19821023 19830120
79 -162.00 0.00 19821023 19830120
79 -127.00 -20.00 19821024 19830121
79 -130.00 -19.00 19821024 19830121
79 -127.00 -19.00 19821024 19830121
79 -116.00 -28.00 19821025 19830122
79 -116.00 -27.00 19821025 19830122
79 -119.00 -25.00 19821025 19830122
79 -120.00 -24.00 19821025 19830122
79 -126.00 -20.00 19821025 19830122
79 -115.00 -28.00 19821026 19830123
79 -115.00 -29.00 19821027 19830124
79 -129.00 3.00 19821027 19830124
79 -128.00 3.00 19821027 19830124
79 -127.00 3.00 19821027 19830124
79 -126.00 3.00 19821027 19830124
79 -133.00 4.00 19821027 19830124
79 -132.00 4.00 19821027 19830124
79 -131.00 4.00 19821027 19830124
79 -130.00 4.00 19821027 19830124
79 -129.00 4.00 19821027 19830124
79 -134.00 4.00 19821028 19830125
79 -129.00 -24.00 19821029 19830126
79 -128.00 -24.00 19821030 19830127
79 -84.00 1.00 19821030 19830127
79 -83.00 1.00 19821030 19830127
79 -86.00 1.00 19821031 19830128
79 -87.00 2.00 19821031 19830128
79 -131.00 3.00 19821102 19830130
79 -130.00 3.00 19821102 19830130
79 -85.00 0.00 19821104 19830201
79 -87.00 1.00 19821104 19830201
79 -159.00 -10.00 19821105 19830202
79 -154.00 -12.00 19821106 19830203
79 -153.00 -12.00 19821106 19830203
79 -161.00 -10.00 19821106 19830203
79 -160.00 -10.00 19821106 19830203
79 -86.00 0.00 19821106 19830203
79 -156.00 -13.00 19821107 19830204
79 -155.00 -13.00 19821107 19830204
79 -156.00 -12.00 19821107 19830204
79 -155.00 -12.00 19821107 19830204
79 -157.00 -13.00 19821108 19830205
79 -114.00 -29.00 19821111 19830208
79 -128.00 -23.00 19821111 19830208
79 -161.00 0.00 19821111 19830208
79 -164.00 1.00 19821111 19830208
79 -163.00 1.00 19821111 19830208
79 -126.00 2.00 19821111 19830208
79 -158.00 -3.00 19821112 19830209
79 -163.00 -2.00 19821112 19830209
79 -162.00 -2.00 19821112 19830209
79 -159.00 -2.00 19821112 19830209
79 -158.00 -2.00 19821112 19830209
79 -161.00 -1.00 19821112 19830209
79 -127.00 2.00 19821112 19830209
79 -127.00 -24.00 19821113 19830210
79 -156.00 -4.00 19821113 19830210
79 -155.00 -4.00 19821113 19830210
79 -157.00 -3.00 19821113 19830210
79 -156.00 -3.00 19821113 19830210
79 -155.00 -3.00 19821113 19830210
79 -118.00 -26.00 19821114 19830211
79 -122.00 -22.00 19821114 19830211
79 -121.00 -22.00 19821114 19830211
79 -131.00 2.00 19821117 19830214
79 -130.00 2.00 19821117 19830214
79 -129.00 2.00 19821117 19830214
79 -132.00 3.00 19821117 19830214
79 -136.00 2.00 19821118 19830215
79 -135.00 2.00 19821118 19830215
79 -133.00 2.00 19821118 19830215
79 -132.00 2.00 19821118 19830215
79 -136.00 3.00 19821118 19830215
79 -135.00 3.00 19821118 19830215
79 -134.00 3.00 19821118 19830215
79 -133.00 3.00 19821118 19830215
79 -117.00 -26.00 19821119 19830216
79 -116.00 -26.00 19821119 19830216
79 -118.00 -25.00 19821119 19830216
79 -117.00 -25.00 19821119 19830216
79 -116.00 -25.00 19821119 19830216
79 -119.00 -24.00 19821119 19830216
79 -118.00 -24.00 19821119 19830216
79 -117.00 -24.00 19821119 19830216
79 -117.00 -23.00 19821119 19830216
79 -120.00 -22.00 19821119 19830216
79 -118.00 -22.00 19821119 19830216
79 -117.00 -22.00 19821119 19830216
79 -116.00 -22.00 19821119 19830216
79 -115.00 -22.00 19821119 19830216
79 -123.00 -21.00 19821119 19830216
79 -122.00 -21.00 19821119 19830216
79 -121.00 -21.00 19821119 19830216
79 -120.00 -21.00 19821119 19830216
79 -119.00 -21.00 19821119 19830216
79 -118.00 -21.00 19821119 19830216
79 -117.00 -21.00 19821119 19830216
79 -116.00 -21.00 19821119 19830216
79 -125.00 -20.00 19821119 19830216
79 -124.00 -20.00 19821119 19830216
79 -123.00 -20.00 19821119 19830216
79 -122.00 -20.00 19821119 19830216
79 -121.00 -20.00 19821119 19830216
79 -120.00 -20.00 19821119 19830216
79 -119.00 -20.00 19821119 19830216
79 -118.00 -20.00 19821119 19830216
79 -126.00 -19.00 19821119 19830216
79 -125.00 -19.00 19821119 19830216
79 -124.00 -19.00 19821119 19830216
79 -123.00 -19.00 19821119 19830216
79 -122.00 -19.00 19821119 19830216
79 -121.00 -19.00 19821119 19830216
79 -120.00 -19.00 19821119 19830216
79 -127.00 -18.00 19821119 19830216
79 -126.00 -18.00 19821119 19830216
79 -125.00 -18.00 19821119 19830216
79 -124.00 -18.00 19821119 19830216
79 -123.00 -18.00 19821119 19830216
79 -122.00 -18.00 19821119 19830216
79 -121.00 -18.00 19821119 19830216
79 -120.00 -18.00 19821119 19830216
79 -127.00 -17.00 19821119 19830216
79 -126.00 -17.00 19821119 19830216
79 -125.00 -17.00 19821119 19830216
79 -124.00 -17.00 19821119 19830216
79 -123.00 -17.00 19821119 19830216
79 -121.00 -17.00 19821119 19830216
79 -120.00 -17.00 19821119 19830216
79 -118.00 -17.00 19821119 19830216
79 -139.00 3.00 19821119 19830216
79 -138.00 3.00 19821119 19830216
79 -137.00 3.00 19821119 19830216
79 -114.00 -28.00 19821120 19830217
79 -115.00 -26.00 19821120 19830217
79 -116.00 -24.00 19821120 19830217
79 -115.00 -21.00 19821120 19830217
79 -117.00 -20.00 19821120 19830217
79 -116.00 -20.00 19821120 19830217
79 -115.00 -20.00 19821120 19830217
79 -119.00 -19.00 19821120 19830217
79 -118.00 -19.00 19821120 19830217
79 -117.00 -19.00 19821120 19830217
79 -116.00 -19.00 19821120 19830217
79 -115.00 -19.00 19821120 19830217
79 -119.00 -18.00 19821120 19830217
79 -118.00 -18.00 19821120 19830217
79 -117.00 -18.00 19821120 19830217
79 -122.00 -17.00 19821120 19830217
79 -119.00 -17.00 19821120 19830217
79 -126.00 -16.00 19821120 19830217
79 -125.00 -16.00 19821120 19830217
79 -124.00 -16.00 19821120 19830217
79 -123.00 -16.00 19821120 19830217
79 -122.00 -16.00 19821120 19830217
79 -121.00 -16.00 19821120 19830217
79 -120.00 -16.00 19821120 19830217
79 -124.00 -15.00 19821120 19830217
79 -123.00 -15.00 19821120 19830217
79 -122.00 -15.00 19821120 19830217
79 -142.00 3.00 19821120 19830217
79 -141.00 3.00 19821120 19830217
79 -150.00 2.00 19821121 19830218
79 -149.00 2.00 19821121 19830218
79 -152.00 2.00 19821122 19830219
79 -151.00 2.00 19821122 19830219
79 -174.00 -6.00 19821123 19830220
79 -154.00 -5.00 19821125 19830222
79 -153.00 -5.00 19821125 19830222
79 -171.00 -4.00 19821125 19830222
79 -152.00 -4.00 19821125 19830222
79 -151.00 -4.00 19821125 19830222
79 -171.00 -3.00 19821125 19830222
79 -156.00 -1.00 19821125 19830222
79 -159.00 0.00 19821125 19830222
79 -158.00 0.00 19821125 19830222
79 -157.00 0.00 19821125 19830222
79 -156.00 0.00 19821125 19830222
79 -155.00 0.00 19821125 19830222
79 -154.00 0.00 19821125 19830222
79 -153.00 0.00 19821125 19830222
79 -152.00 0.00 19821125 19830222
79 -151.00 0.00 19821125 19830222
79 -150.00 0.00 19821125 19830222
79 -149.00 0.00 19821125 19830222
79 -159.00 1.00 19821125 19830222
79 -158.00 1.00 19821125 19830222
79 -157.00 1.00 19821125 19830222
79 -154.00 1.00 19821125 19830222
79 -153.00 1.00 19821125 19830222
79 -152.00 1.00 19821125 19830222
79 -151.00 1.00 19821125 19830222
79 -150.00 1.00 19821125 19830222
79 -149.00 1.00 19821125 19830222
79 -148.00 1.00 19821125 19830222
79 -147.00 1.00 19821125 19830222
79 -146.00 1.00 19821125 19830222
79 -148.00 2.00 19821125 19830222
79 -147.00 2.00 19821125 19830222
79 -146.00 2.00 19821125 19830222
79 -145.00 2.00 19821125 19830222
79 -144.00 2.00 19821125 19830222
79 -143.00 2.00 19821125 19830222
79 -173.00 -5.00 19821126 19830223
79 -172.00 -5.00 19821126 19830223
79 -152.00 -5.00 19821126 19830223
79 -151.00 -5.00 19821126 19830223
79 -172.00 -4.00 19821126 19830223
79 -157.00 -4.00 19821126 19830223
79 -154.00 -4.00 19821126 19830223
79 -153.00 -4.00 19821126 19830223
79 -152.00 -3.00 19821126 19830223
79 -151.00 -3.00 19821126 19830223
79 -160.00 -2.00 19821126 19830223
79 -157.00 -2.00 19821126 19830223
79 -156.00 -2.00 19821126 19830223
79 -152.00 -2.00 19821126 19830223
79 -151.00 -2.00 19821126 19830223
79 -159.00 -1.00 19821126 19830223
79 -158.00 -1.00 19821126 19830223
79 -157.00 -1.00 19821126 19830223
79 -155.00 -1.00 19821126 19830223
79 -154.00 -1.00 19821126 19830223
79 -153.00 -1.00 19821126 19830223
79 -152.00 -1.00 19821126 19830223
79 -151.00 -1.00 19821126 19830223
79 -150.00 -1.00 19821126 19830223
79 -142.00 2.00 19821126 19830223
79 -172.00 -6.00 19821127 19830224
79 -171.00 -5.00 19821127 19830224
79 -162.00 -5.00 19821127 19830224
79 -156.00 -5.00 19821127 19830224
79 -155.00 -5.00 19821127 19830224
79 -158.00 -4.00 19821127 19830224
79 -160.00 -3.00 19821127 19830224
79 -159.00 -3.00 19821127 19830224
79 -150.00 -12.00 19821128 19830225
79 -168.00 -4.00 19821128 19830225
79 -167.00 -4.00 19821128 19830225
79 -166.00 -4.00 19821128 19830225
79 -130.00 -1.00 19821128 19830225
79 -129.00 0.00 19821128 19830225
79 -128.00 0.00 19821128 19830225
79 -127.00 0.00 19821128 19830225
79 -143.00 1.00 19821128 19830225
79 -142.00 1.00 19821128 19830225
79 -135.00 1.00 19821128 19830225
79 -132.00 1.00 19821128 19830225
79 -131.00 1.00 19821128 19830225
79 -130.00 1.00 19821128 19830225
79 -129.00 1.00 19821128 19830225
79 -128.00 1.00 19821128 19830225
79 -127.00 1.00 19821128 19830225
79 -126.00 1.00 19821128 19830225
79 -148.00 -14.00 19821129 19830226
79 -149.00 -13.00 19821129 19830226
79 152.00 -8.00 19821129 19830226
79 153.00 -8.00 19821129 19830226
79 -173.00 -6.00 19821129 19830226
79 -136.00 0.00 19821129 19830226
79 -135.00 0.00 19821129 19830226
79 -145.00 1.00 19821129 19830226
79 -141.00 1.00 19821129 19830226
79 -136.00 1.00 19821129 19830226
79 -137.00 2.00 19821129 19830226
79 -152.00 -13.00 19821130 19830227
79 -161.00 -5.00 19821130 19830227
79 -160.00 -5.00 19821130 19830227
79 -159.00 -5.00 19821130 19830227
79 -158.00 -5.00 19821130 19830227
79 -157.00 -5.00 19821130 19830227
79 -161.00 -4.00 19821130 19830227
79 -160.00 -4.00 19821130 19830227
79 -159.00 -4.00 19821130 19830227
79 -161.00 -3.00 19821130 19830227
79 -139.00 0.00 19821130 19830227
79 -138.00 0.00 19821130 19830227
79 -137.00 0.00 19821130 19830227
79 -140.00 1.00 19821130 19830227
79 -139.00 1.00 19821130 19830227
79 -138.00 1.00 19821130 19830227
79 -141.00 2.00 19821130 19830227
79 -140.00 2.00 19821130 19830227
79 -139.00 2.00 19821130 19830227
79 -138.00 2.00 19821130 19830227
79 -140.00 3.00 19821130 19830227
79 -165.00 -4.00 19821201 19830228
79 -162.00 -4.00 19821201 19830228
79 -163.00 -3.00 19821201 19830228
79 -162.00 -3.00 19821201 19830228
79 -158.00 -10.00 19821203 19830302
79 -137.00 -1.00 19821203 19830302
79 -136.00 -1.00 19821203 19830302
79 -135.00 -1.00 19821203 19830302
79 -84.00 0.00 19821203 19830302
79 -83.00 0.00 19821203 19830302
79 151.00 -8.00 19821204 19830303
79 176.00 -5.00 19821204 19830303
79 -136.00 -2.00 19821204 19830303
79 175.00 -5.00 19821205 19830304
79 173.00 -4.00 19821205 19830304
79 -87.00 0.00 19821205 19830304
79 -86.00 -1.00 19821206 19830305
79 -114.00 -22.00 19821207 19830306
79 -113.00 -22.00 19821207 19830306
79 -137.00 -2.00 19821208 19830307
79 -114.00 -19.00 19821209 19830308
79 -113.00 -19.00 19821209 19830308
79 -116.00 -18.00 19821209 19830308
79 -115.00 -18.00 19821209 19830308
79 -117.00 -17.00 19821209 19830308
79 -116.00 -17.00 19821209 19830308
79 163.00 -5.00 19821209 19830308
79 166.00 -5.00 19821209 19830308
79 167.00 -5.00 19821209 19830308
79 169.00 -5.00 19821209 19830308
79 170.00 -5.00 19821209 19830308
79 171.00 -5.00 19821209 19830308
79 172.00 -5.00 19821209 19830308
79 173.00 -5.00 19821209 19830308
79 174.00 -5.00 19821209 19830308
79 -138.00 -1.00 19821209 19830308
79 -150.00 -7.00 19821210 19830309
79 160.00 -5.00 19821210 19830309
79 161.00 -5.00 19821210 19830309
79 162.00 -5.00 19821210 19830309
79 -86.00 -2.00 19821210 19830309
79 -85.00 -2.00 19821210 19830309
79 -90.00 -1.00 19821211 19830310
79 -85.00 -1.00 19821211 19830310
79 -148.00 0.00 19821211 19830310
79 -116.00 -16.00 19821212 19830311
79 -120.00 -15.00 19821212 19830311
79 -147.00 -13.00 19821212 19830311
79 -146.00 -13.00 19821212 19830311
79 -150.00 -4.00 19821212 19830311
79 -149.00 -2.00 19821212 19830311
79 -149.00 -1.00 19821212 19830311
79 -148.00 -1.00 19821212 19830311
79 -147.00 -1.00 19821212 19830311
79 -119.00 -16.00 19821213 19830312
79 -118.00 -16.00 19821213 19830312
79 -117.00 -16.00 19821213 19830312
79 157.00 -5.00 19821213 19830312
79 158.00 -5.00 19821213 19830312
79 -150.00 -2.00 19821213 19830312
79 -148.00 -2.00 19821213 19830312
79 -147.00 -2.00 19821213 19830312
79 -144.00 0.00 19821213 19830312
79 -140.00 0.00 19821213 19830312
79 -143.00 -16.00 19821214 19830313
79 -142.00 -16.00 19821214 19830313
79 -143.00 -15.00 19821214 19830313
79 -142.00 -15.00 19821214 19830313
79 -121.00 -15.00 19821214 19830313
79 -145.00 -14.00 19821214 19830313
79 -142.00 -14.00 19821214 19830313
79 -144.00 -3.00 19821214 19830313
79 -144.00 -2.00 19821214 19830313
79 -146.00 -1.00 19821214 19830313
79 -145.00 -1.00 19821214 19830313
79 -141.00 -1.00 19821214 19830313
79 -140.00 -1.00 19821214 19830313
79 -143.00 0.00 19821214 19830313
79 -142.00 0.00 19821214 19830313
79 -141.00 0.00 19821214 19830313
79 -144.00 -14.00 19821215 19830314
79 -145.00 -3.00 19821215 19830314
79 -143.00 -3.00 19821215 19830314
79 -141.00 -2.00 19821215 19830314
79 -89.00 -2.00 19821215 19830314
79 -139.00 -1.00 19821215 19830314
79 -143.00 -14.00 19821216 19830315
79 -144.00 -11.00 19821216 19830315
79 -143.00 -11.00 19821216 19830315
79 -144.00 -10.00 19821216 19830315
79 -146.00 -12.00 19821218 19830317
79 -145.00 -9.00 19821218 19830317
79 -144.00 -9.00 19821218 19830317
79 154.00 -7.00 19821218 19830317
79 -147.00 -12.00 19821219 19830318
79 -150.00 -11.00 19821219 19830318
79 152.00 -9.00 19821219 19830318
79 154.00 -8.00 19821219 19830318
79 155.00 -8.00 19821219 19830318
79 155.00 -7.00 19821219 19830318
79 156.00 -7.00 19821219 19830318
79 157.00 -7.00 19821219 19830318
79 -153.00 -11.00 19821220 19830319
79 -152.00 -11.00 19821220 19830319
79 153.00 -9.00 19821220 19830319
79 -127.00 -3.00 19821220 19830319
79 -162.00 -9.00 19821221 19830320
79 -161.00 -9.00 19821221 19830320
79 -126.00 -3.00 19821221 19830320
79 -126.00 -2.00 19821221 19830320
79 -125.00 -2.00 19821221 19830320
79 -127.00 -1.00 19821221 19830320
79 -141.00 -15.00 19821222 19830321
79 -140.00 -15.00 19821222 19830321
79 -139.00 -15.00 19821222 19830321
79 -141.00 -14.00 19821222 19830321
79 -140.00 -14.00 19821222 19830321
79 -167.00 -10.00 19821222 19830321
79 -166.00 -9.00 19821222 19830321
79 -165.00 -9.00 19821222 19830321
79 156.00 -8.00 19821222 19830321
79 -130.00 -3.00 19821222 19830321
79 -129.00 -3.00 19821222 19830321
79 -128.00 -3.00 19821222 19830321
79 -131.00 -2.00 19821222 19830321
79 -130.00 -2.00 19821222 19830321
79 -129.00 -2.00 19821222 19830321
79 -128.00 -2.00 19821222 19830321
79 -127.00 -2.00 19821222 19830321
79 -104.00 2.00 19821222 19830321
79 -138.00 -15.00 19821223 19830322
79 -137.00 -15.00 19821223 19830322
79 -139.00 -2.00 19821223 19830322
79 -138.00 -2.00 19821223 19830322
79 -129.00 -1.00 19821223 19830322
79 -128.00 -1.00 19821223 19830322
79 -124.00 -1.00 19821223 19830322
79 -131.00 -23.00 19821224 19830323
79 -130.00 -23.00 19821224 19830323
79 -136.00 -15.00 19821224 19830323
79 154.00 -9.00 19821224 19830323
79 150.00 -8.00 19821224 19830323
79 150.00 -9.00 19821225 19830324
79 151.00 -9.00 19821225 19830324
79 172.00 -7.00 19821225 19830324
79 173.00 -7.00 19821225 19830324
79 174.00 -7.00 19821225 19830324
79 172.00 -6.00 19821225 19830324
79 173.00 -6.00 19821225 19830324
79 -139.00 -16.00 19821226 19830325
79 149.00 -8.00 19821226 19830325
79 176.00 -7.00 19821226 19830325
79 178.00 -7.00 19821226 19830325
79 179.00 -7.00 19821226 19830325
79 178.00 -6.00 19821226 19830325
79 -85.00 -3.00 19821226 19830325
79 -84.00 -3.00 19821226 19830325
79 -83.00 -3.00 19821226 19830325
79 -84.00 -2.00 19821226 19830325
79 -83.00 -2.00 19821226 19830325
79 -169.00 -10.00 19821227 19830326
79 -168.00 -10.00 19821227 19830326
79 -164.00 -9.00 19821227 19830326
79 -163.00 -9.00 19821227 19830326
79 -174.00 -8.00 19821227 19830326
79 -167.00 -8.00 19821227 19830326
79 -166.00 -8.00 19821227 19830326
79 -165.00 -8.00 19821227 19830326
79 -164.00 -8.00 19821227 19830326
79 -163.00 -8.00 19821227 19830326
79 -162.00 -8.00 19821227 19830326
79 -161.00 -8.00 19821227 19830326
79 -155.00 -8.00 19821227 19830326
79 -154.00 -8.00 19821227 19830326
79 -151.00 -8.00 19821227 19830326
79 -150.00 -8.00 19821227 19830326
79 -174.00 -7.00 19821227 19830326
79 -165.00 -7.00 19821227 19830326
79 -164.00 -7.00 19821227 19830326
79 -163.00 -7.00 19821227 19830326
79 -162.00 -7.00 19821227 19830326
79 -161.00 -7.00 19821227 19830326
79 -159.00 -7.00 19821227 19830326
79 -158.00 -7.00 19821227 19830326
79 -157.00 -7.00 19821227 19830326
79 -156.00 -7.00 19821227 19830326
79 -155.00 -7.00 19821227 19830326
79 166.00 -7.00 19821227 19830326
79 170.00 -7.00 19821227 19830326
79 171.00 -7.00 19821227 19830326
79 175.00 -7.00 19821227 19830326
79 -166.00 -6.00 19821227 19830326
79 -165.00 -6.00 19821227 19830326
79 -164.00 -6.00 19821227 19830326
79 -159.00 -6.00 19821227 19830326
79 -158.00 -6.00 19821227 19830326
79 -157.00 -6.00 19821227 19830326
79 -156.00 -6.00 19821227 19830326
79 163.00 -6.00 19821227 19830326
79 164.00 -6.00 19821227 19830326
79 165.00 -6.00 19821227 19830326
79 166.00 -6.00 19821227 19830326
79 167.00 -6.00 19821227 19830326
79 -166.00 -5.00 19821227 19830326
79 -165.00 -5.00 19821227 19830326
79 -136.00 -16.00 19821228 19830327
79 -148.00 -11.00 19821228 19830327
79 -147.00 -11.00 19821228 19830327
79 -171.00 -10.00 19821228 19830327
79 -170.00 -10.00 19821228 19830327
79 -149.00 -9.00 19821228 19830327
79 -148.00 -9.00 19821228 19830327
79 -147.00 -9.00 19821228 19830327
79 -146.00 -9.00 19821228 19830327
79 -149.00 -8.00 19821228 19830327
79 -148.00 -8.00 19821228 19830327
79 -147.00 -8.00 19821228 19830327
79 -160.00 -7.00 19821228 19830327
79 164.00 -7.00 19821228 19830327
79 165.00 -7.00 19821228 19830327
79 -162.00 -6.00 19821228 19830327
79 -161.00 -6.00 19821228 19830327
79 -160.00 -6.00 19821228 19830327
79 159.00 -6.00 19821228 19830327
79 161.00 -6.00 19821228 19830327
79 162.00 -6.00 19821228 19830327
79 170.00 -6.00 19821228 19830327
79 171.00 -6.00 19821228 19830327
79 -167.00 -5.00 19821228 19830327
79 -121.00 1.00 19821228 19830327
79 -157.00 -9.00 19821229 19830328
79 -160.00 -8.00 19821229 19830328
79 -159.00 -8.00 19821229 19830328
79 -158.00 -8.00 19821229 19830328
79 -157.00 -8.00 19821229 19830328
79 168.00 -8.00 19821229 19830328
79 169.00 -8.00 19821229 19830328
79 170.00 -8.00 19821229 19830328
79 171.00 -8.00 19821229 19830328
79 158.00 -7.00 19821229 19830328
79 163.00 -7.00 19821229 19830328
79 167.00 -7.00 19821229 19830328
79 168.00 -7.00 19821229 19830328
79 169.00 -7.00 19821229 19830328
79 -171.00 -6.00 19821229 19830328
79 -170.00 -6.00 19821229 19830328
79 -163.00 -6.00 19821229 19830328
79 157.00 -6.00 19821229 19830328
79 158.00 -6.00 19821229 19830328
79 -164.00 -5.00 19821229 19830328
79 -163.00 -5.00 19821229 19830328
79 -120.00 -1.00 19821229 19830328
79 -119.00 -1.00 19821229 19830328
79 -118.00 -1.00 19821229 19830328
79 -117.00 -1.00 19821229 19830328
79 -116.00 -1.00 19821229 19830328
79 -121.00 0.00 19821229 19830328
79 -120.00 0.00 19821229 19830328
79 -119.00 0.00 19821229 19830328
79 -118.00 0.00 19821229 19830328
79 -117.00 0.00 19821229 19830328
79 -130.00 -24.00 19821230 19830329
79 -179.00 -10.00 19821230 19830329
79 -178.00 -10.00 19821230 19830329
79 153.00 -10.00 19821230 19830329
79 -160.00 -9.00 19821230 19830329
79 -159.00 -9.00 19821230 19830329
79 -158.00 -9.00 19821230 19830329
79 -156.00 -8.00 19821230 19830329
79 -126.00 -26.00 19821231 19830330
79 -125.00 -26.00 19821231 19830330
79 -127.00 -25.00 19821231 19830330
79 -126.00 -25.00 19821231 19830330
79 -125.00 -25.00 19821231 19830330
79 -124.00 -25.00 19821231 19830330
79 -171.00 -7.00 19821231 19830330
79 -169.00 -6.00 19821231 19830330
79 -168.00 -6.00 19821231 19830330
79 155.00 -6.00 19821231 19830330
79 156.00 -6.00 19821231 19830330
79 -168.00 -5.00 19821231 19830330
79 -108.00 2.00 19821231 19830330
79 -123.00 -25.00 19830101 19830331
79 -122.00 -25.00 19830101 19830331
79 -121.00 -25.00 19830101 19830331
79 -124.00 -24.00 19830101 19830331
79 -123.00 -24.00 19830101 19830331
79 -122.00 -24.00 19830101 19830331
79 -168.00 -9.00 19830101 19830331
79 167.00 -9.00 19830101 19830331
79 168.00 -9.00 19830101 19830331
79 169.00 -9.00 19830101 19830331
79 -168.00 -8.00 19830101 19830331
79 -175.00 -7.00 19830101 19830331
79 -168.00 -7.00 19830101 19830331
79 -167.00 -7.00 19830101 19830331
79 -166.00 -7.00 19830101 19830331
79 -167.00 -6.00 19830101 19830331
79 -121.00 -24.00 19830102 19830401
79 -122.00 -23.00 19830102 19830401
79 -79.00 -12.00 19830102 19830401
79 -78.00 -12.00 19830102 19830401
79 -79.00 -11.00 19830102 19830401
79 -178.00 -9.00 19830102 19830401
79 -167.00 -9.00 19830102 19830401
79 -177.00 -8.00 19830102 19830401
79 -176.00 -8.00 19830102 19830401
79 -175.00 -8.00 19830102 19830401
79 153.00 -7.00 19830102 19830401
79 -123.00 -22.00 19830103 19830402
79 -79.00 -10.00 19830103 19830402
79 172.00 -10.00 19830103 19830402
79 173.00 -10.00 19830103 19830402
79 -180.00 -9.00 19830103 19830402
79 -179.00 -9.00 19830103 19830402
79 170.00 -9.00 19830103 19830402
79 171.00 -9.00 19830103 19830402
79 172.00 -9.00 19830103 19830402
79 173.00 -9.00 19830103 19830402
79 174.00 -9.00 19830103 19830402
79 175.00 -9.00 19830103 19830402
79 176.00 -9.00 19830103 19830402
79 177.00 -9.00 19830103 19830402
79 178.00 -9.00 19830103 19830402
79 179.00 -9.00 19830103 19830402
79 -180.00 -8.00 19830103 19830402
79 -179.00 -8.00 19830103 19830402
79 -178.00 -8.00 19830103 19830402
79 -173.00 -8.00 19830103 19830402
79 -169.00 -8.00 19830103 19830402
79 172.00 -8.00 19830103 19830402
79 173.00 -8.00 19830103 19830402
79 174.00 -8.00 19830103 19830402
79 175.00 -8.00 19830103 19830402
79 176.00 -8.00 19830103 19830402
79 177.00 -8.00 19830103 19830402
79 178.00 -8.00 19830103 19830402
79 179.00 -8.00 19830103 19830402
79 -170.00 -7.00 19830103 19830402
79 -169.00 -7.00 19830103 19830402
79 159.00 -7.00 19830103 19830402
79 160.00 -7.00 19830103 19830402
79 -85.00 -4.00 19830103 19830402
79 -84.00 -4.00 19830103 19830402
79 -150.00 -3.00 19830103 19830402
79 -155.00 -2.00 19830103 19830402
79 -154.00 -2.00 19830103 19830402
79 -153.00 -2.00 19830103 19830402
79 -126.00 -21.00 19830104 19830403
79 -125.00 -21.00 19830104 19830403
79 166.00 -8.00 19830104 19830403
79 167.00 -8.00 19830104 19830403
79 162.00 -7.00 19830104 19830403
79 -153.00 -3.00 19830104 19830403
79 -93.00 -2.00 19830104 19830403
79 -92.00 -2.00 19830104 19830403
79 -120.00 -28.00 19830105 19830404
79 -122.00 -26.00 19830105 19830404
79 -121.00 -26.00 19830105 19830404
79 -170.00 -5.00 19830105 19830404
79 -169.00 -5.00 19830105 19830404
79 -86.00 -5.00 19830105 19830404
79 -85.00 -5.00 19830105 19830404
79 -87.00 -4.00 19830105 19830404
79 -86.00 -4.00 19830105 19830404
79 -95.00 -2.00 19830105 19830404
79 -94.00 -2.00 19830105 19830404
79 -121.00 2.00 19830105 19830404
79 -116.00 3.00 19830105 19830404
79 -115.00 3.00 19830105 19830404
79 -156.00 -11.00 19830106 19830405
79 -114.00 3.00 19830106 19830405
79 -113.00 3.00 19830106 19830405
79 -112.00 3.00 19830106 19830405
79 -158.00 -11.00 19830107 19830406
79 -151.00 -11.00 19830107 19830406
79 -157.00 -10.00 19830107 19830406
79 -156.00 -10.00 19830107 19830406
79 -156.00 -9.00 19830107 19830406
79 -94.00 -1.00 19830107 19830406
79 -83.00 -1.00 19830107 19830406
79 -129.00 -17.00 19830108 19830407
79 -128.00 -17.00 19830108 19830407
79 -157.00 -11.00 19830108 19830407
79 -155.00 -11.00 19830108 19830407
79 -154.00 -11.00 19830108 19830407
79 -125.00 -3.00 19830108 19830407
79 -124.00 -3.00 19830108 19830407
79 -89.00 -3.00 19830108 19830407
79 -88.00 -3.00 19830108 19830407
79 -87.00 -3.00 19830108 19830407
79 -124.00 -2.00 19830108 19830407
79 -123.00 -2.00 19830108 19830407
79 -122.00 -2.00 19830108 19830407
79 -91.00 -2.00 19830108 19830407
79 -90.00 -2.00 19830108 19830407
79 -93.00 -1.00 19830108 19830407
79 -92.00 -1.00 19830108 19830407
79 -91.00 -1.00 19830108 19830407
79 -180.00 -10.00 19830109 19830408
79 174.00 -10.00 19830109 19830408
79 175.00 -10.00 19830109 19830408
79 176.00 -10.00 19830109 19830408
79 177.00 -10.00 19830109 19830408
79 178.00 -10.00 19830109 19830408
79 179.00 -10.00 19830109 19830408
79 -170.00 -4.00 19830109 19830408
79 -169.00 -4.00 19830109 19830408
79 -170.00 -3.00 19830109 19830408
79 -123.00 -3.00 19830109 19830408
79 -121.00 -2.00 19830109 19830408
79 -96.00 -2.00 19830109 19830408
79 -125.00 -4.00 19830110 19830409
79 -124.00 -4.00 19830110 19830409
79 -122.00 -3.00 19830110 19830409
79 -86.00 -3.00 19830110 19830409
79 -110.00 2.00 19830110 19830409
79 -105.00 2.00 19830110 19830409
79 -169.00 -3.00 19830111 19830410
79 -168.00 -3.00 19830111 19830410
79 -91.00 -3.00 19830111 19830410
79 -112.00 2.00 19830111 19830410
79 -109.00 2.00 19830111 19830410
79 -106.00 2.00 19830111 19830410
79 -144.00 -15.00 19830112 19830411
79 -137.00 -14.00 19830112 19830411
79 -136.00 -14.00 19830112 19830411
79 -137.00 -13.00 19830112 19830411
79 -136.00 -13.00 19830112 19830411
79 -141.00 -9.00 19830112 19830411
79 -146.00 -8.00 19830112 19830411
79 -145.00 -8.00 19830112 19830411
79 -143.00 -8.00 19830112 19830411
79 -142.00 -8.00 19830112 19830411
79 -141.00 -8.00 19830112 19830411
79 -140.00 -8.00 19830112 19830411
79 -148.00 -7.00 19830112 19830411
79 -147.00 -7.00 19830112 19830411
79 -146.00 -7.00 19830112 19830411
79 -145.00 -7.00 19830112 19830411
79 -144.00 -7.00 19830112 19830411
79 -143.00 -7.00 19830112 19830411
79 -142.00 -7.00 19830112 19830411
79 -141.00 -7.00 19830112 19830411
79 -140.00 -7.00 19830112 19830411
79 -149.00 -6.00 19830112 19830411
79 -148.00 -6.00 19830112 19830411
79 -147.00 -6.00 19830112 19830411
79 -146.00 -6.00 19830112 19830411
79 -144.00 -6.00 19830112 19830411
79 -143.00 -6.00 19830112 19830411
79 -142.00 -6.00 19830112 19830411
79 -147.00 -5.00 19830112 19830411
79 -146.00 -5.00 19830112 19830411
79 -87.00 -5.00 19830112 19830411
79 -149.00 -4.00 19830112 19830411
79 -147.00 -4.00 19830112 19830411
79 -146.00 -4.00 19830112 19830411
79 -145.00 -4.00 19830112 19830411
79 -154.00 -3.00 19830112 19830411
79 -93.00 -3.00 19830112 19830411
79 -92.00 -3.00 19830112 19830411
79 -113.00 2.00 19830112 19830411
79 -134.00 -16.00 19830113 19830412
79 -133.00 -16.00 19830113 19830412
79 -135.00 -14.00 19830113 19830412
79 -141.00 -10.00 19830113 19830412
79 -140.00 -9.00 19830113 19830412
79 -144.00 -8.00 19830113 19830412
79 -154.00 -7.00 19830113 19830412
79 -153.00 -7.00 19830113 19830412
79 -149.00 -7.00 19830113 19830412
79 -155.00 -6.00 19830113 19830412
79 -154.00 -6.00 19830113 19830412
79 -150.00 -6.00 19830113 19830412
79 -145.00 -6.00 19830113 19830412
79 -145.00 -5.00 19830113 19830412
79 -144.00 -4.00 19830113 19830412
79 -132.00 -16.00 19830114 19830413
79 -135.00 -15.00 19830114 19830413
79 -134.00 -15.00 19830114 19830413
79 -133.00 -15.00 19830114 19830413
79 -139.00 -14.00 19830114 19830413
79 -138.00 -14.00 19830114 19830413
79 -145.00 -13.00 19830114 19830413
79 -144.00 -13.00 19830114 19830413
79 -143.00 -13.00 19830114 19830413
79 -142.00 -13.00 19830114 19830413
79 -141.00 -13.00 19830114 19830413
79 -139.00 -13.00 19830114 19830413
79 -145.00 -12.00 19830114 19830413
79 -149.00 -10.00 19830114 19830413
79 -147.00 -10.00 19830114 19830413
79 -150.00 -9.00 19830114 19830413
79 -152.00 -8.00 19830114 19830413
79 -152.00 -7.00 19830114 19830413
79 -153.00 -6.00 19830114 19830413
79 -120.00 1.00 19830114 19830413
79 -138.00 -13.00 19830115 19830414
79 -144.00 -12.00 19830115 19830414
79 -143.00 -12.00 19830115 19830414
79 -142.00 -12.00 19830115 19830414
79 -141.00 -12.00 19830115 19830414
79 -140.00 -12.00 19830115 19830414
79 -146.00 -11.00 19830115 19830414
79 -145.00 -11.00 19830115 19830414
79 -142.00 -11.00 19830115 19830414
79 -141.00 -11.00 19830115 19830414
79 -140.00 -11.00 19830115 19830414
79 -152.00 -10.00 19830115 19830414
79 -151.00 -10.00 19830115 19830414
79 -150.00 -10.00 19830115 19830414
79 -148.00 -10.00 19830115 19830414
79 -146.00 -10.00 19830115 19830414
79 -145.00 -10.00 19830115 19830414
79 -119.00 1.00 19830115 19830414
79 -118.00 1.00 19830115 19830414
79 -120.00 2.00 19830115 19830414
79 -119.00 2.00 19830115 19830414
79 -139.00 -12.00 19830116 19830415
79 -138.00 -12.00 19830116 19830415
79 -137.00 -12.00 19830116 19830415
79 -136.00 -12.00 19830116 19830415
79 -139.00 -11.00 19830116 19830415
79 -138.00 -11.00 19830116 19830415
79 -78.00 -11.00 19830116 19830415
79 -155.00 -10.00 19830116 19830415
79 -121.00 -3.00 19830116 19830415
79 -117.00 1.00 19830116 19830415
79 -115.00 1.00 19830116 19830415
79 -117.00 2.00 19830116 19830415
79 -116.00 2.00 19830116 19830415
79 -115.00 2.00 19830116 19830415
79 -114.00 2.00 19830116 19830415
79 -154.00 -10.00 19830117 19830416
79 -153.00 -10.00 19830117 19830416
79 -155.00 -9.00 19830117 19830416
79 -154.00 -9.00 19830117 19830416
79 -153.00 -9.00 19830117 19830416
79 -152.00 -9.00 19830117 19830416
79 -151.00 -9.00 19830117 19830416
79 -153.00 -8.00 19830117 19830416
79 -133.00 -5.00 19830118 19830417
79 -132.00 -5.00 19830118 19830417
79 -133.00 -4.00 19830118 19830417
79 -132.00 -4.00 19830118 19830417
79 -116.00 1.00 19830118 19830417
79 -114.00 1.00 19830118 19830417
79 -113.00 1.00 19830118 19830417
79 -134.00 -5.00 19830119 19830418
79 -138.00 -4.00 19830119 19830418
79 -137.00 -4.00 19830119 19830418
79 -136.00 -4.00 19830119 19830418
79 -135.00 -4.00 19830119 19830418
79 -140.00 -2.00 19830119 19830418
79 -135.00 -6.00 19830120 19830419
79 -134.00 -6.00 19830120 19830419
79 -135.00 -5.00 19830120 19830419
79 -139.00 -7.00 19830121 19830420
79 -138.00 -5.00 19830121 19830420
79 -143.00 -4.00 19830121 19830420
79 -110.00 0.00 19830121 19830420
79 -110.00 1.00 19830121 19830420
79 -109.00 1.00 19830121 19830420
79 -108.00 1.00 19830121 19830420
79 -107.00 1.00 19830121 19830420
79 -106.00 1.00 19830121 19830420
79 -129.00 -14.00 19830122 19830421
79 -126.00 -14.00 19830122 19830421
79 -81.00 -10.00 19830122 19830421
79 -138.00 -8.00 19830122 19830421
79 -137.00 -8.00 19830122 19830421
79 -138.00 -7.00 19830122 19830421
79 -137.00 -7.00 19830122 19830421
79 -136.00 -7.00 19830122 19830421
79 -83.00 -4.00 19830122 19830421
79 -119.00 -2.00 19830122 19830421
79 -118.00 -2.00 19830122 19830421
79 -117.00 -2.00 19830122 19830421
79 -83.00 -10.00 19830123 19830422
79 -82.00 -10.00 19830123 19830422
79 -83.00 -9.00 19830124 19830423
79 -131.00 -4.00 19830124 19830423
79 -120.00 -2.00 19830124 19830423
79 -116.00 -2.00 19830124 19830423
79 -125.00 -14.00 19830125 19830424
79 -124.00 -14.00 19830125 19830424
79 -81.00 -6.00 19830125 19830424
79 -80.00 -6.00 19830125 19830424
79 -128.00 -15.00 19830126 19830425
79 -127.00 -15.00 19830126 19830425
79 -126.00 -15.00 19830126 19830425
79 -125.00 -15.00 19830126 19830425
79 -130.00 -14.00 19830126 19830425
79 -128.00 -14.00 19830126 19830425
79 -127.00 -14.00 19830126 19830425
79 -82.00 -9.00 19830126 19830425
79 -81.00 -9.00 19830126 19830425
79 -80.00 -9.00 19830126 19830425
79 -79.00 -9.00 19830126 19830425
79 -83.00 -8.00 19830126 19830425
79 -82.00 -8.00 19830126 19830425
79 -81.00 -8.00 19830126 19830425
79 -80.00 -8.00 19830126 19830425
79 -79.00 -8.00 19830126 19830425
79 -80.00 -7.00 19830126 19830425
79 -79.00 -7.00 19830126 19830425
79 -83.00 -6.00 19830126 19830425
79 -82.00 -6.00 19830126 19830425
79 -127.00 -16.00 19830127 19830426
79 -131.00 -15.00 19830127 19830426
79 -129.00 -15.00 19830127 19830426
79 -134.00 -14.00 19830127 19830426
79 -133.00 -14.00 19830127 19830426
79 -120.00 -3.00 19830127 19830426
79 -131.00 -16.00 19830128 19830427
79 -130.00 -16.00 19830128 19830427
79 -129.00 -16.00 19830128 19830427
79 -128.00 -16.00 19830128 19830427
79 -132.00 -15.00 19830128 19830427
79 -130.00 -15.00 19830128 19830427
79 -132.00 -14.00 19830128 19830427
79 -131.00 -14.00 19830131 19830430
79 -80.00 -11.00 19830131 19830430
79 -80.00 -10.00 19830131 19830430
79 -81.00 -7.00 19830131 19830430
79 -126.00 -4.00 19830131 19830430
79 -135.00 -13.00 19830201 19830501
79 -134.00 -13.00 19830201 19830501
79 -135.00 -12.00 19830201 19830501
79 -82.00 -7.00 19830201 19830501
79 -126.00 -5.00 19830201 19830501
79 -83.00 -5.00 19830202 19830502
79 -123.00 -14.00 19830203 19830503
79 -130.00 -13.00 19830203 19830503
79 -129.00 -13.00 19830203 19830503
79 -128.00 -13.00 19830203 19830503
79 -127.00 -13.00 19830203 19830503
79 -126.00 -13.00 19830203 19830503
79 -125.00 -13.00 19830203 19830503
79 -124.00 -13.00 19830203 19830503
79 -123.00 -13.00 19830203 19830503
79 -126.00 -12.00 19830203 19830503
79 -125.00 -12.00 19830203 19830503
79 -123.00 -12.00 19830203 19830503
79 -121.00 -12.00 19830203 19830503
79 -120.00 -4.00 19830203 19830503
79 -133.00 -13.00 19830204 19830504
79 -132.00 -13.00 19830204 19830504
79 -131.00 -13.00 19830204 19830504
79 -128.00 -12.00 19830204 19830504
79 -124.00 -12.00 19830204 19830504
79 -83.00 -7.00 19830204 19830504
79 -133.00 -6.00 19830204 19830504
79 -132.00 -6.00 19830204 19830504
79 -144.00 -1.00 19830205 19830505
79 -134.00 -12.00 19830206 19830506
79 -133.00 -12.00 19830206 19830506
79 -132.00 -12.00 19830206 19830506
79 -131.00 -12.00 19830206 19830506
79 -127.00 -12.00 19830206 19830506
79 -133.00 -11.00 19830206 19830506
79 -132.00 -11.00 19830206 19830506
79 -131.00 -11.00 19830206 19830506
79 -130.00 -11.00 19830206 19830506
79 -129.00 -11.00 19830206 19830506
79 -128.00 -11.00 19830206 19830506
79 -127.00 -11.00 19830206 19830506
79 -126.00 -11.00 19830206 19830506
79 -125.00 -11.00 19830206 19830506
79 -88.00 -7.00 19830206 19830506
79 -122.00 -14.00 19830207 19830507
79 -122.00 -13.00 19830207 19830507
79 -121.00 -13.00 19830207 19830507
79 -130.00 -12.00 19830207 19830507
79 -131.00 -9.00 19830207 19830507
79 -135.00 -7.00 19830207 19830507
79 -134.00 -7.00 19830207 19830507
79 -133.00 -7.00 19830207 19830507
79 -132.00 -7.00 19830207 19830507
79 -91.00 -6.00 19830207 19830507
79 -90.00 -6.00 19830207 19830507
79 -89.00 -6.00 19830207 19830507
79 -90.00 -5.00 19830207 19830507
79 -129.00 -12.00 19830208 19830508
79 -121.00 -11.00 19830208 19830508
79 -134.00 -8.00 19830208 19830508
79 -130.00 -8.00 19830208 19830508
79 -129.00 -8.00 19830208 19830508
79 -131.00 -7.00 19830208 19830508
79 -130.00 -7.00 19830208 19830508
79 -129.00 -7.00 19830208 19830508
79 -128.00 -7.00 19830208 19830508
79 -131.00 -6.00 19830208 19830508
79 -130.00 -6.00 19830208 19830508
79 -129.00 -6.00 19830208 19830508
79 -128.00 -6.00 19830208 19830508
79 -92.00 -6.00 19830208 19830508
79 -131.00 -5.00 19830208 19830508
79 -130.00 -5.00 19830208 19830508
79 -129.00 -5.00 19830208 19830508
79 -128.00 -5.00 19830208 19830508
79 -127.00 -5.00 19830208 19830508
79 -94.00 -5.00 19830208 19830508
79 -93.00 -5.00 19830208 19830508
79 -92.00 -5.00 19830208 19830508
79 -91.00 -5.00 19830208 19830508
79 -94.00 -4.00 19830208 19830508
79 -93.00 -4.00 19830208 19830508
79 -92.00 -4.00 19830208 19830508
79 -91.00 -4.00 19830208 19830508
79 -94.00 -3.00 19830208 19830508
79 -122.00 -12.00 19830209 19830509
79 -137.00 -11.00 19830209 19830509
79 -136.00 -11.00 19830209 19830509
79 -135.00 -11.00 19830209 19830509
79 -134.00 -11.00 19830209 19830509
79 -124.00 -11.00 19830209 19830509
79 -123.00 -11.00 19830209 19830509
79 -122.00 -11.00 19830209 19830509
79 -137.00 -10.00 19830209 19830509
79 -136.00 -10.00 19830209 19830509
79 -135.00 -10.00 19830209 19830509
79 -134.00 -10.00 19830209 19830509
79 -133.00 -10.00 19830209 19830509
79 -132.00 -10.00 19830209 19830509
79 -131.00 -10.00 19830209 19830509
79 -130.00 -10.00 19830209 19830509
79 -126.00 -10.00 19830209 19830509
79 -125.00 -10.00 19830209 19830509
79 -124.00 -10.00 19830209 19830509
79 -123.00 -10.00 19830209 19830509
79 -134.00 -9.00 19830209 19830509
79 -133.00 -9.00 19830209 19830509
79 -132.00 -9.00 19830209 19830509
79 -130.00 -9.00 19830209 19830509
79 -129.00 -9.00 19830209 19830509
79 -128.00 -9.00 19830209 19830509
79 -127.00 -9.00 19830209 19830509
79 -126.00 -9.00 19830209 19830509
79 -125.00 -9.00 19830209 19830509
79 -124.00 -9.00 19830209 19830509
79 -133.00 -8.00 19830209 19830509
79 -132.00 -8.00 19830209 19830509
79 -131.00 -8.00 19830209 19830509
79 -128.00 -8.00 19830209 19830509
79 -127.00 -8.00 19830209 19830509
79 -126.00 -8.00 19830209 19830509
79 -125.00 -8.00 19830209 19830509
79 -124.00 -8.00 19830209 19830509
79 -127.00 -7.00 19830209 19830509
79 -126.00 -7.00 19830209 19830509
79 -125.00 -7.00 19830209 19830509
79 -124.00 -7.00 19830209 19830509
79 -123.00 -7.00 19830209 19830509
79 -127.00 -6.00 19830209 19830509
79 -126.00 -6.00 19830209 19830509
79 -125.00 -6.00 19830209 19830509
79 -124.00 -6.00 19830209 19830509
79 -123.00 -6.00 19830209 19830509
79 -122.00 -6.00 19830209 19830509
79 -121.00 -6.00 19830209 19830509
79 -120.00 -6.00 19830209 19830509
79 -119.00 -6.00 19830209 19830509
79 -118.00 -6.00 19830209 19830509
79 -123.00 -5.00 19830209 19830509
79 -122.00 -5.00 19830209 19830509
79 -96.00 -4.00 19830209 19830509
79 -95.00 -3.00 19830209 19830509
79 -107.00 -14.00 19830210 19830510
79 -137.00 -9.00 19830210 19830510
79 -136.00 -9.00 19830210 19830510
79 -135.00 -9.00 19830210 19830510
79 -136.00 -8.00 19830210 19830510
79 -135.00 -8.00 19830210 19830510
79 -120.00 -8.00 19830210 19830510
79 -119.00 -8.00 19830210 19830510
79 -119.00 -7.00 19830210 19830510
79 -118.00 -7.00 19830210 19830510
79 -117.00 -6.00 19830210 19830510
79 -125.00 -5.00 19830210 19830510
79 -124.00 -5.00 19830210 19830510
79 -121.00 -5.00 19830210 19830510
79 -118.00 -5.00 19830210 19830510
79 -130.00 -4.00 19830210 19830510
79 -139.00 -3.00 19830210 19830510
79 -137.00 -3.00 19830210 19830510
79 -129.00 -10.00 19830211 19830511
79 -128.00 -10.00 19830211 19830511
79 -127.00 -10.00 19830211 19830511
79 -120.00 -7.00 19830211 19830511
79 -116.00 -6.00 19830211 19830511
79 -115.00 -6.00 19830211 19830511
79 -136.00 -3.00 19830211 19830511
79 -135.00 -3.00 19830211 19830511
79 -133.00 -3.00 19830211 19830511
79 -98.00 -3.00 19830211 19830511
79 -97.00 -3.00 19830211 19830511
79 -96.00 -3.00 19830211 19830511
79 -97.00 -2.00 19830211 19830511
79 -122.00 -10.00 19830212 19830512
79 -123.00 -9.00 19830212 19830512
79 -122.00 -9.00 19830212 19830512
79 -118.00 -9.00 19830212 19830512
79 -123.00 -8.00 19830212 19830512
79 -122.00 -8.00 19830212 19830512
79 -121.00 -8.00 19830212 19830512
79 -118.00 -8.00 19830212 19830512
79 -117.00 -8.00 19830212 19830512
79 -122.00 -7.00 19830212 19830512
79 -121.00 -7.00 19830212 19830512
79 -117.00 -7.00 19830212 19830512
79 -120.00 -5.00 19830212 19830512
79 -119.00 -5.00 19830212 19830512
79 -117.00 -5.00 19830212 19830512
79 -116.00 -5.00 19830212 19830512
79 -115.00 -5.00 19830212 19830512
79 -101.00 -4.00 19830212 19830512
79 -97.00 -4.00 19830212 19830512
79 -132.00 -3.00 19830212 19830512
79 -104.00 -3.00 19830212 19830512
79 -135.00 -2.00 19830212 19830512
79 -134.00 -2.00 19830212 19830512
79 -106.00 -2.00 19830212 19830512
79 -105.00 -2.00 19830212 19830512
79 -104.00 -2.00 19830212 19830512
79 -103.00 -2.00 19830212 19830512
79 -99.00 -2.00 19830212 19830512
79 -98.00 -2.00 19830212 19830512
79 -105.00 -1.00 19830212 19830512
79 -104.00 -1.00 19830212 19830512
79 -103.00 -1.00 19830212 19830512
79 -105.00 0.00 19830212 19830512
79 -110.00 -12.00 19830213 19830513
79 -121.00 -10.00 19830213 19830513
79 -121.00 -9.00 19830213 19830513
79 -120.00 -9.00 19830213 19830513
79 -119.00 -9.00 19830213 19830513
79 -142.00 -2.00 19830213 19830513
79 -109.00 -2.00 19830213 19830513
79 -108.00 -2.00 19830213 19830513
79 -107.00 -2.00 19830213 19830513
79 -112.00 -1.00 19830213 19830513
79 -111.00 -1.00 19830213 19830513
79 -110.00 -1.00 19830213 19830513
79 -109.00 -1.00 19830213 19830513
79 -108.00 -1.00 19830213 19830513
79 -107.00 -1.00 19830213 19830513
79 -106.00 -1.00 19830213 19830513
79 -102.00 -1.00 19830213 19830513
79 -109.00 0.00 19830213 19830513
79 -108.00 0.00 19830213 19830513
79 -107.00 0.00 19830213 19830513
79 -106.00 0.00 19830213 19830513
79 -105.00 1.00 19830213 19830513
79 -109.00 -10.00 19830214 19830514
79 -94.00 -6.00 19830214 19830514
79 -123.00 -4.00 19830214 19830514
79 -122.00 -4.00 19830214 19830514
79 -121.00 -4.00 19830214 19830514
79 -119.00 -4.00 19830214 19830514
79 -118.00 -4.00 19830214 19830514
79 -117.00 -4.00 19830214 19830514
79 -116.00 -4.00 19830214 19830514
79 -115.00 -4.00 19830214 19830514
79 -119.00 -3.00 19830214 19830514
79 -118.00 -3.00 19830214 19830514
79 -117.00 -3.00 19830214 19830514
79 -116.00 -3.00 19830214 19830514
79 -115.00 -3.00 19830214 19830514
79 -114.00 -3.00 19830214 19830514
79 -115.00 -2.00 19830214 19830514
79 -114.00 -2.00 19830214 19830514
79 -143.00 -1.00 19830214 19830514
79 -142.00 -1.00 19830214 19830514
79 -117.00 -15.00 19830215 19830515
79 -116.00 -15.00 19830215 19830515
79 -115.00 -15.00 19830215 19830515
79 -116.00 -14.00 19830215 19830515
79 -115.00 -14.00 19830215 19830515
79 -114.00 -14.00 19830215 19830515
79 -98.00 -12.00 19830215 19830515
79 -110.00 -9.00 19830215 19830515
79 -101.00 -5.00 19830215 19830515
79 -96.00 -5.00 19830215 19830515
79 -118.00 -15.00 19830216 19830516
79 -118.00 -14.00 19830216 19830516
79 -117.00 -14.00 19830216 19830516
79 -119.00 -13.00 19830216 19830516
79 -118.00 -13.00 19830216 19830516
79 -118.00 -11.00 19830216 19830516
79 -118.00 -10.00 19830216 19830516
79 -117.00 -10.00 19830216 19830516
79 -116.00 -10.00 19830216 19830516
79 -115.00 -10.00 19830216 19830516
79 -114.00 -10.00 19830216 19830516
79 -93.00 -6.00 19830216 19830516
79 -103.00 -5.00 19830216 19830516
79 -102.00 -5.00 19830216 19830516
79 -95.00 -5.00 19830216 19830516
79 -102.00 -4.00 19830216 19830516
79 -90.00 -4.00 19830216 19830516
79 -133.00 -2.00 19830216 19830516
79 -132.00 -2.00 19830216 19830516
79 -121.00 -1.00 19830216 19830516
79 -84.00 -1.00 19830216 19830516
79 -119.00 -15.00 19830217 19830517
79 -121.00 -14.00 19830217 19830517
79 -120.00 -14.00 19830217 19830517
79 -119.00 -14.00 19830217 19830517
79 -120.00 -13.00 19830217 19830517
79 -117.00 -13.00 19830217 19830517
79 -120.00 -12.00 19830217 19830517
79 -119.00 -12.00 19830217 19830517
79 -120.00 -11.00 19830217 19830517
79 -119.00 -11.00 19830217 19830517
79 -120.00 -10.00 19830217 19830517
79 -119.00 -10.00 19830217 19830517
79 -85.00 -6.00 19830217 19830517
79 -84.00 -6.00 19830217 19830517
79 -89.00 -5.00 19830217 19830517
79 -88.00 -5.00 19830217 19830517
79 -84.00 -5.00 19830217 19830517
79 -89.00 -4.00 19830217 19830517
79 -88.00 -4.00 19830217 19830517
79 -143.00 -2.00 19830217 19830517
79 -88.00 -2.00 19830217 19830517
79 -87.00 -2.00 19830217 19830517
79 -87.00 -1.00 19830217 19830517
79 -107.00 -10.00 19830218 19830518
79 -85.00 -7.00 19830218 19830518
79 -84.00 -7.00 19830218 19830518
79 -86.00 -6.00 19830218 19830518
79 -131.00 -3.00 19830218 19830518
79 -88.00 -1.00 19830218 19830518
79 -107.00 -12.00 19830219 19830519
79 -106.00 -12.00 19830219 19830519
79 -109.00 -11.00 19830219 19830519
79 -108.00 -11.00 19830219 19830519
79 -84.00 -10.00 19830219 19830519
79 -130.00 -17.00 19830220 19830520
79 -109.00 -12.00 19830220 19830520
79 -108.00 -12.00 19830220 19830520
79 -85.00 -10.00 19830220 19830520
79 -85.00 -9.00 19830220 19830520
79 -84.00 -9.00 19830220 19830520
79 -84.00 -8.00 19830220 19830520
79 -94.00 -7.00 19830220 19830520
79 -89.00 -1.00 19830220 19830520
79 -88.00 -9.00 19830221 19830521
79 -86.00 -9.00 19830221 19830521
79 -88.00 -8.00 19830221 19830521
79 -87.00 -8.00 19830221 19830521
79 -86.00 -8.00 19830221 19830521
79 -85.00 -8.00 19830221 19830521
79 -95.00 -7.00 19830221 19830521
79 -87.00 -7.00 19830221 19830521
79 -86.00 -7.00 19830221 19830521
79 -103.00 0.00 19830221 19830521
79 -102.00 0.00 19830221 19830521
79 -101.00 0.00 19830221 19830521
79 -100.00 0.00 19830221 19830521
79 -99.00 0.00 19830221 19830521
79 -108.00 -10.00 19830222 19830522
79 -105.00 -10.00 19830222 19830522
79 -109.00 -9.00 19830222 19830522
79 -108.00 -9.00 19830222 19830522
79 -104.00 -9.00 19830222 19830522
79 -107.00 -8.00 19830222 19830522
79 -106.00 -8.00 19830222 19830522
79 -89.00 -8.00 19830222 19830522
79 -93.00 -7.00 19830222 19830522
79 -92.00 -7.00 19830222 19830522
79 -91.00 -7.00 19830222 19830522
79 -90.00 -7.00 19830222 19830522
79 -89.00 -7.00 19830222 19830522
79 -103.00 -6.00 19830222 19830522
79 -102.00 -6.00 19830222 19830522
79 -87.00 -9.00 19830223 19830523
79 -109.00 -8.00 19830223 19830523
79 -95.00 -8.00 19830223 19830523
79 -106.00 -6.00 19830223 19830523
79 -101.00 -6.00 19830223 19830523
79 -99.00 -6.00 19830223 19830523
79 -98.00 -6.00 19830223 19830523
79 -97.00 -6.00 19830223 19830523
79 -96.00 -6.00 19830223 19830523
79 -95.00 -6.00 19830223 19830523
79 -99.00 -5.00 19830223 19830523
79 -98.00 1.00 19830224 19830524
79 -97.00 1.00 19830224 19830524
79 -99.00 2.00 19830224 19830524
79 -98.00 2.00 19830224 19830524
79 -97.00 2.00 19830224 19830524
79 -107.00 -9.00 19830225 19830525
79 -106.00 -9.00 19830225 19830525
79 -105.00 -9.00 19830225 19830525
79 -108.00 -8.00 19830225 19830525
79 -100.00 -8.00 19830225 19830525
79 -110.00 -8.00 19830226 19830526
79 -121.00 -28.00 19830227 19830527
79 -122.00 -27.00 19830227 19830527
79 -121.00 -27.00 19830227 19830527
79 -113.00 -10.00 19830228 19830528
79 -112.00 -10.00 19830228 19830528
79 -115.00 -9.00 19830228 19830528
79 -114.00 -9.00 19830228 19830528
79 -113.00 -9.00 19830228 19830528
79 -111.00 -7.00 19830228 19830528
79 -110.00 -7.00 19830228 19830528
79 -111.00 -6.00 19830228 19830528
79 -110.00 -6.00 19830228 19830528
79 -113.00 -2.00 19830228 19830528
79 -112.00 -2.00 19830228 19830528
79 -111.00 -10.00 19830301 19830529
79 -110.00 -10.00 19830301 19830529
79 -112.00 -9.00 19830301 19830529
79 -111.00 -9.00 19830301 19830529
79 -115.00 -8.00 19830301 19830529
79 -114.00 -8.00 19830301 19830529
79 -113.00 -8.00 19830301 19830529
79 -112.00 -8.00 19830301 19830529
79 -111.00 -8.00 19830301 19830529
79 -105.00 -8.00 19830301 19830529
79 -104.00 -8.00 19830301 19830529
79 -103.00 -8.00 19830301 19830529
79 -102.00 -8.00 19830301 19830529
79 -101.00 -8.00 19830301 19830529
79 -114.00 -7.00 19830301 19830529
79 -113.00 -7.00 19830301 19830529
79 -112.00 -7.00 19830301 19830529
79 -109.00 -7.00 19830301 19830529
79 -108.00 -7.00 19830301 19830529
79 -107.00 -7.00 19830301 19830529
79 -106.00 -7.00 19830301 19830529
79 -105.00 -7.00 19830301 19830529
79 -112.00 -6.00 19830301 19830529
79 -109.00 -6.00 19830301 19830529
79 -108.00 -6.00 19830301 19830529
79 -107.00 -6.00 19830301 19830529
79 -111.00 -5.00 19830301 19830529
79 -114.00 -4.00 19830301 19830529
79 -113.00 -3.00 19830301 19830529
79 -112.00 -3.00 19830301 19830529
79 -118.00 -12.00 19830302 19830530
79 -117.00 -12.00 19830302 19830530
79 -116.00 -12.00 19830302 19830530
79 -115.00 -12.00 19830302 19830530
79 -111.00 -12.00 19830302 19830530
79 -117.00 -11.00 19830302 19830530
79 -116.00 -11.00 19830302 19830530
79 -115.00 -11.00 19830302 19830530
79 -114.00 -11.00 19830302 19830530
79 -113.00 -11.00 19830302 19830530
79 -112.00 -11.00 19830302 19830530
79 -111.00 -11.00 19830302 19830530
79 -110.00 -11.00 19830302 19830530
79 -117.00 -9.00 19830302 19830530
79 -116.00 -9.00 19830302 19830530
79 -116.00 -8.00 19830302 19830530
79 -116.00 -7.00 19830302 19830530
79 -115.00 -7.00 19830302 19830530
79 -104.00 -7.00 19830302 19830530
79 -103.00 -7.00 19830302 19830530
79 -114.00 -6.00 19830302 19830530
79 -113.00 -6.00 19830302 19830530
79 -112.00 -5.00 19830302 19830530
79 -110.00 -5.00 19830302 19830530
79 -109.00 -5.00 19830302 19830530
79 -108.00 -5.00 19830302 19830530
79 -111.00 -4.00 19830302 19830530
79 -110.00 -4.00 19830302 19830530
79 -109.00 -4.00 19830302 19830530
79 -107.00 -11.00 19830303 19830531
79 -106.00 -10.00 19830303 19830531
79 -102.00 -7.00 19830303 19830531
79 -113.00 -4.00 19830303 19830531
79 -112.00 -4.00 19830303 19830531
79 -101.00 -1.00 19830303 19830531
79 -100.00 -1.00 19830303 19830531
79 -99.00 -1.00 19830303 19830531
79 -109.00 -3.00 19830304 19830601
79 -107.00 -3.00 19830304 19830601
79 -106.00 -3.00 19830304 19830601
79 -105.00 -3.00 19830304 19830601
79 -98.00 -1.00 19830304 19830601
79 -101.00 -7.00 19830305 19830602
79 -100.00 -7.00 19830305 19830602
79 -99.00 -7.00 19830305 19830602
79 -98.00 -7.00 19830305 19830602
79 -100.00 -6.00 19830305 19830602
79 -111.00 -3.00 19830305 19830602
79 -110.00 -3.00 19830305 19830602
79 -111.00 -2.00 19830305 19830602
79 -110.00 -2.00 19830305 19830602
79 -104.00 0.00 19830306 19830603
79 -97.00 -12.00 19830308 19830605
79 -97.00 -1.00 19830308 19830605
79 -96.00 -1.00 19830308 19830605
79 -95.00 -1.00 19830308 19830605
79 -98.00 0.00 19830308 19830605
79 -97.00 0.00 19830308 19830605
79 -96.00 0.00 19830308 19830605
79 -95.00 0.00 19830308 19830605
79 -94.00 0.00 19830308 19830605
79 -103.00 1.00 19830308 19830605
79 -102.00 1.00 19830308 19830605
79 -101.00 1.00 19830308 19830605
79 -100.00 1.00 19830308 19830605
79 -99.00 1.00 19830308 19830605
79 -94.00 1.00 19830308 19830605
79 -93.00 1.00 19830308 19830605
79 -98.00 -11.00 19830309 19830606
79 -97.00 -11.00 19830309 19830606
79 -97.00 -9.00 19830309 19830606
79 -96.00 -8.00 19830309 19830606
79 -88.00 -6.00 19830309 19830606
79 -97.00 -10.00 19830310 19830607
79 -87.00 -6.00 19830310 19830607
79 -97.00 -7.00 19830312 19830609
79 -96.00 -7.00 19830313 19830610
79 -111.00 -13.00 19830314 19830611
79 -114.00 -12.00 19830314 19830611
79 -113.00 -12.00 19830314 19830611
79 -112.00 -12.00 19830314 19830611
79 -99.00 -9.00 19830314 19830611
79 -114.00 -13.00 19830315 19830612
79 -112.00 -13.00 19830315 19830612
79 -98.00 -9.00 19830315 19830612
79 -99.00 -8.00 19830315 19830612
79 -104.00 1.00 19830315 19830612
79 -112.00 -14.00 19830316 19830613
79 -113.00 -13.00 19830316 19830613
79 -110.00 -13.00 19830316 19830613
79 -109.00 -13.00 19830316 19830613
79 -108.00 -13.00 19830316 19830613
79 -97.00 -8.00 19830316 19830613
79 -116.00 -13.00 19830317 19830614
79 -115.00 -13.00 19830317 19830614
79 -98.00 -10.00 19830317 19830614
79 -98.00 -8.00 19830317 19830614
79 -118.00 2.00 19830319 19830616
79 -107.00 -13.00 19830324 19830621
79 -104.00 2.00 19830401 19830629
79 -108.00 2.00 19830403 19830701
79 -107.00 2.00 19830403 19830701
79 -103.00 2.00 19830403 19830701
79 -106.00 2.00 19830411 19830709
79 -105.00 2.00 19830411 19830709
79 -100.00 2.00 19830411 19830709
79 -102.00 2.00 19830413 19830711
79 -101.00 2.00 19830413 19830711
79 -83.00 0.00 19830421 19830719
79 -91.00 0.00 19830422 19830720
79 -90.00 0.00 19830422 19830720
79 -89.00 0.00 19830422 19830720
79 -88.00 0.00 19830422 19830720
79 -87.00 0.00 19830422 19830720
79 -86.00 0.00 19830422 19830720
79 -95.00 1.00 19830422 19830720
79 -92.00 1.00 19830422 19830720
79 -91.00 1.00 19830422 19830720
79 -90.00 1.00 19830422 19830720
79 -89.00 1.00 19830422 19830720
79 -84.00 0.00 19830423 19830721
79 -82.00 0.00 19830423 19830721
79 -107.00 -16.00 19830424 19830722
79 -106.00 -16.00 19830424 19830722
79 -85.00 0.00 19830424 19830722
79 -112.00 -15.00 19830426 19830724
79 -107.00 -15.00 19830426 19830724
79 -106.00 -15.00 19830426 19830724
79 -108.00 -15.00 19830427 19830725
79 -110.00 -14.00 19830427 19830725
79 -109.00 -14.00 19830427 19830725
79 -108.00 -14.00 19830427 19830725
79 -90.00 2.00 19830427 19830725
79 -87.00 1.00 19830428 19830726
79 -86.00 1.00 19830428 19830726
79 -85.00 1.00 19830428 19830726
79 -84.00 1.00 19830428 19830726
79 -96.00 1.00 19830429 19830727
79 -88.00 1.00 19830429 19830727
79 -89.00 2.00 19830429 19830727
79 -88.00 2.00 19830429 19830727
79 -87.00 2.00 19830429 19830727
79 -96.00 2.00 19830430 19830728
[truncated: 6,245,239 more chars]
